# Supplementary material for: Ni-Catalyzed asymmetric reduction of α-keto-β-lactamsviaDKR enabled by proton shuttling
Source: Royal Society of Chemistry journal article supplement (doi:10.1039/d0cc05599a), 2020-01-01
Supplement: d0cc05599a1.pdf [file d0cc05599a1.pdf]

## Supporting Information

### Ni-Catalyzed Asymmetric Reduction of $\alpha$ -Keto- $\beta$ -Lactams via DKR Enabled by Proton Shuttling

Fangyuan Wang<sup>#,†,‡</sup> Xuefeng Tan,<sup>#,‡</sup> Ting Wu,<sup>‡</sup> Long-Sheng Zheng,<sup>‡</sup> Gen-Qiang Chen,<sup>‡,§,\*</sup> Xumu Zhang<sup>‡,\*</sup>

<sup>†</sup> *School of Chemistry and Chemical Engineering, Harbin Institute of Technology, Harbin 150001, People's Republic of China.*

<sup>‡</sup> *Shenzhen Grubbs Institute and Department of Chemistry, Southern University of Science and Technology, Shenzhen 518000, People's Republic of China.*

<sup>§</sup> *Academy for Advanced Interdisciplinary Studies, Southern University of Science and Technology, Shenzhen 518000, People's Republic of China.*

[chengq@sustech.edu.cn](mailto:chengq@sustech.edu.cn), [zhangxm@sustech.edu.cn](mailto:zhangxm@sustech.edu.cn)

<sup>#</sup> *Fangyuan Wang and Xuefeng Tan contributed equally to this work.*

### Content

|                                                                                 |     |
|---------------------------------------------------------------------------------|-----|
| 1. General Information.....                                                     | 2   |
| 2. General Procedures for the Synthesis of Substrates.....                      | 3   |
| 3. Detailed Optimization of the Reaction Conditions.....                        | 15  |
| 4. General Procedure for the Asymmetric Hydrogenation via DKR.....              | 21  |
| 5. Deuterium-labelling Experiments.....                                         | 35  |
| 6. Rationale for the Origin of Diastereoselectivity and Enantioselectivity..... | 37  |
| 7. Synthetic Applications.....                                                  | 38  |
| 8. NMR Spectroscopic Data.....                                                  | 42  |
| 9. HPLC Spectra of the Products.....                                            | 98  |
| 10. References.....                                                             | 156 |

## 1. General Information.

Unless otherwise mentioned, all experiments were carried out under an atmosphere of argon or using standard Schlenk techniques. Solvents and reagents were purchased from commercial suppliers and used without further purification. Column Chromatography was performed with silica gel Merck 60 (300-400 mesh). NMR spectra were recorded on a Bruker DPX 400 spectrometer at 400 MHz for  $^1\text{H}$  NMR, 101 MHz for  $^{13}\text{C}$  NMR and a Bruker DPX 600 spectrometer at 600 MHz for  $^1\text{H}$  NMR, 151 MHz for  $^{13}\text{C}$  NMR.  $\text{CDCl}_3$  and  $d^6$ -DMSO was the solvent used for the NMR analysis, with tetramethylsilane (TMS) as the internal standard. Chemical shifts are reported in ppm and coupling constants are given in Hz. Chemical shifts were reported relative to TMS (0.00 ppm) for  $^1\text{H}$  NMR and relative to  $\text{CDCl}_3$  (77.0 ppm) for  $^{13}\text{C}$  NMR. HPLC analysis was carried out on Agilent 1260 Series instrument using a chiral stationary phase IA or OD-3. PE refers to petroleum ether, and EA refers to ethyl acetate.

## 2. General Procedures for the Synthesis of Substrates.

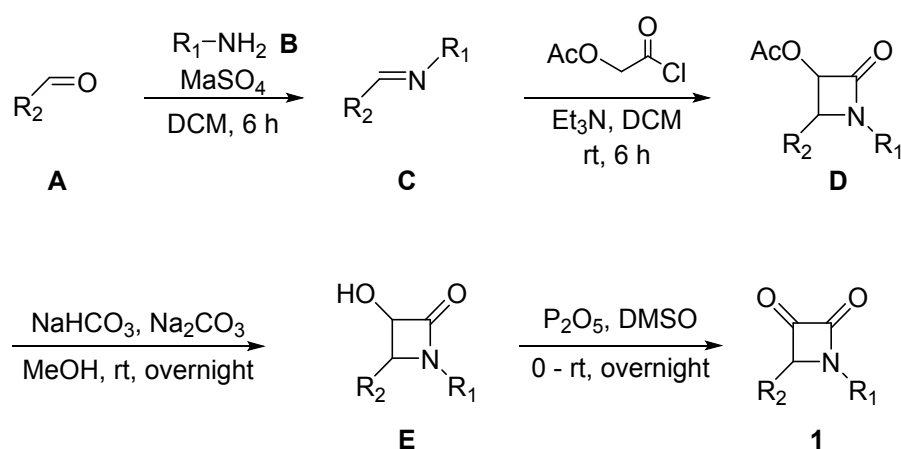

**Scheme S1. Synthetic Routes of Substrates**

**Compound C**<sup>[1]</sup>: To a solution of aldehydes **A** (20 mmol, 1.0 equiv.), primary amines **B** (20 mmol, 1.0 equiv.) in DCM (50 mL) was added  $\text{MgSO}_4$  (40 mmol, 2.0 equiv.). The mixture was stirred at room temperature for 2-16 hours until the start materials was consumed completely, the mixture was filtered and the filter liquor was concentrated under vacuum. The crude product was obtained and used into the next step directly.

**Compound D**<sup>[1a]</sup>: To a solution of crude **C** (20 mmol, 1.0 equiv.) in DCM (50 mL) was added 2-chloro-2-oxoethyl acetate (30 mmol, 1.5 equiv.) and the mixture was cooled to 0 °C.  $\text{Et}_3\text{N}$  (60 mmol, 3.0 equiv.) was added slowly by syringe and then the mixture was stirred at room temperature for 6 hours until the start materials was consumed completely. The mixture was quenched by 20 mL  $\text{H}_2\text{O}$ , and then extracted by DCM (50 mL\*2). The combined organic layers were washed by  $\text{NH}_4\text{Cl}$  and brine, dried over anhydrous  $\text{Na}_2\text{SO}_4$ , filtered and concentrated under vacuum. The crude product was purified by chromatography ( $\text{SiO}_2$ , PE/EA from 20:1 to 4:1). Compound **D** was obtained as a light-yellow solid (57 - 84% yield).

**Compound E**<sup>[1a]</sup>: To a solution of **D** (10 mmol, 1.0 equiv.) in MeOH (30 mL) was added saturated  $\text{NaHCO}_3$  aqueous solution (15 mL), then  $\text{Na}_2\text{CO}_3$  (0.3 equiv.) was added into the mixture and the mixture was stirred at room temperature overnight until the start materials was consumed completely. The mixture was quenched by 20 mL  $\text{H}_2\text{O}$ , and the obtained clear liquid was concentrated under vacuum to remove most

MeOH. After the above process, the mixture was extracted by DCM (50 mL\*2), the combined organic layer was washed by NH<sub>4</sub>Cl and brine, dried over anhydrous Na<sub>2</sub>SO<sub>4</sub>, filtered and concentrated under vacuum. The crude product was used into the next step without further purification.

**Compound 1** <sup>[1b]</sup>: To a solution of **E** (10 mmol, 1.0 equiv.) in DMSO (20 mL) was cooled to 0 °C and added P<sub>2</sub>O<sub>5</sub> (15 mol, 1.5 equiv.) under Ar. The mixture was stirred at room temperature overnight until the start material **E** was consumed completely. The mixture was quenched by saturated NaHCO<sub>3</sub> aqueous solution (20 mL) carefully, and extracted by DCM (50 mL\*2). The combined organic layer was washed by NH<sub>4</sub>Cl and brine, dried over anhydrous Na<sub>2</sub>SO<sub>4</sub>, filtered and concentrated under vacuum to give the crude product. The crude product was purified by chromatography (SiO<sub>2</sub>, PE/EA from 15:1 to 2:1). Compound **1** was obtained as a yellow solid (56 - 82% yield).

#### Characterization Data of Substrate

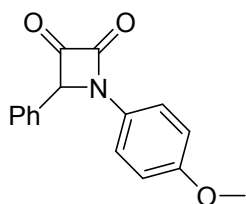

**1-(4-methoxyphenyl)-4-phenylazetidine-2,3-dione (1a)**: This is a known compound.<sup>[1b]</sup> Yellow powder, 2.1 g, 78% yield. <sup>1</sup>H NMR (600 MHz, Chloroform-*d*) δ 7.52 – 7.35 (m, 5H), 7.35 – 7.30 (m, 2H), 6.88 (dd, *J* = 9.0, 1.6 Hz, 2H), 5.55 (s, 1H), 3.78 (s, 3H). <sup>13</sup>C NMR (151 MHz, Chloroform-*d*) δ 190.6, 160.0, 158.0, 131.7, 129.9, 129.5, 129.4, 126.4, 119.8, 114.8, 74.9, 55.5. HRMS (ESI<sup>+</sup>), *m/z* 268.0965 ([*M*+*H*]<sup>+</sup>), calcd for C<sub>16</sub>H<sub>14</sub>NO<sub>3</sub><sup>+</sup>: 268.0968.

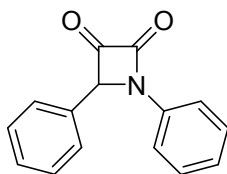

**1,4-diphenylazetidine-2,3-dione (1b)**: This is a known compound.<sup>[1b]</sup> White powder, 1.66 g, 70% yield. <sup>1</sup>H NMR (400 MHz, Chloroform-*d*) δ 7.51 (dd, *J* = 7.8, 1.7 Hz, 2H),

7.45 – 7.28 (m, 7H), 7.22 (t,  $J = 7.4$  Hz, 1H), 5.60 (s, 1H).  $^{13}\text{C}$  NMR (101 MHz, Chloroform-*d*)  $\delta$  190.9, 160.6, 136.4, 131.6, 129.6, 129.6, 129.5, 126.6, 126.3, 118.3, 74.9. HRMS (ESI<sup>+</sup>),  $m/z$  238.0859 ( $[\text{M}+\text{H}]^+$ ), calcd for  $\text{C}_{15}\text{H}_{12}\text{NO}_2^+$ : 238.0863.

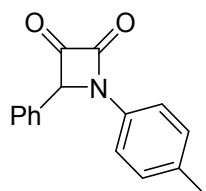

**4-phenyl-1-(*p*-tolyl) azetidione (1c):** This is a new compound. Yellow powder, 2.05 g, 82% yield.  $^1\text{H}$  NMR (400 MHz, Chloroform-*d*)  $\delta$  7.45 – 7.28 (m, 7H), 7.21 – 7.12 (m, 2H), 5.56 (s, 1H), 2.32 (s, 3H).  $^{13}\text{C}$  NMR (101 MHz, Chloroform-*d*)  $\delta$  190.9, 160.4, 136.8, 134.0, 131.7, 130.1, 129.5, 129.4, 126.3, 118.3, 74.9, 21.2. HRMS (ESI<sup>+</sup>),  $m/z$  252.1015 ( $[\text{M}+\text{H}]^+$ ), calcd for  $\text{C}_{16}\text{H}_{14}\text{NO}_2^+$ : 252.1019.

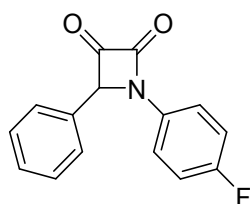

**1-(4-fluorophenyl)-4-phenylazetidione (1d):** This is a known compound. <sup>[1a]</sup> Yellow powder, 1.58 g, 62% yield.  $^1\text{H}$  NMR (400 MHz, Chloroform-*d*)  $\delta$  7.54 – 7.46 (m, 2H), 7.46 – 7.38 (m, 3H), 7.35 – 7.28 (m, 2H), 7.11 – 7.02 (m, 2H), 5.58 (s, 1H).  $^{13}\text{C}$  NMR (101 MHz, Chloroform-*d*)  $\delta$  190.5, 160.3, 161.7, 159.3 (d,  $J = 248.5$  Hz), 132.7, 132.7 (d,  $J = 3.0$  Hz), 131.3, 129.7, 129.6, 126.3, 120.0, 119.9 (d,  $J = 8.1$  Hz), 116.7, 116.5 (d,  $J = 23.2$  Hz). 75.1. HRMS (ESI<sup>+</sup>),  $m/z$  256.0764 ( $[\text{M}+\text{H}]^+$ ), calcd for  $\text{C}_{15}\text{H}_{11}\text{FNO}_2^+$ : 256.0768.

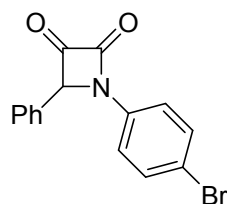

**1-(4-bromophenyl)-4-phenylazetidione (1e):** This is a known compound. <sup>[4]</sup> Yellow powder, 1.85 g, 59% yield.  $^1\text{H}$  NMR (400 MHz, Chloroform-*d*)  $\delta$  7.52 – 7.45

(m, 2H), 7.45 – 7.36 (m, 5H), 7.34 – 7.28 (m, 2H), 5.58 (s, 1H). <sup>13</sup>C NMR (101 MHz, Chloroform-*d*) δ 190.4, 160.6, 135.3, 132.7, 131.1, 129.8, 129.6, 126.3, 119.7, 119.7, 74.9. HRMS (ESI<sup>+</sup>), *m/z* 315.9964 ([M+H]<sup>+</sup>), calcd for C<sub>15</sub>H<sub>11</sub>BrNO<sub>2</sub><sup>+</sup>: 315.9968.

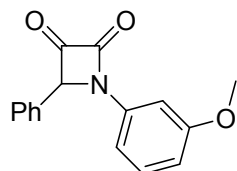

**1-(3-methoxyphenyl)-4-phenylazetidine-2,3-dione (1f):** This is a new compound. Yellow powder, 1.50 g, 56% yield. <sup>1</sup>H NMR (400 MHz, Chloroform-*d*) δ 7.44 – 7.37 (m, 3H), 7.35 – 7.29 (m, 2H), 7.25 – 7.20 (m, 2H), 6.96 – 6.90 (m, 1H), 6.80 – 6.74 (m, 1H), 5.58 (s, 1H), 3.78 (s, 3H). <sup>13</sup>C NMR (101 MHz, Chloroform-*d*) δ 190.9, 160.7, 160.4, 137.4, 131.6, 130.4, 129.6, 129.5, 126.3, 112.6, 110.6, 104.1, 75.1, 55.4. HRMS (ESI<sup>+</sup>), *m/z* 268.0965 ([M+H]<sup>+</sup>), calcd for C<sub>16</sub>H<sub>14</sub>NO<sub>3</sub><sup>+</sup>: 268.0968.

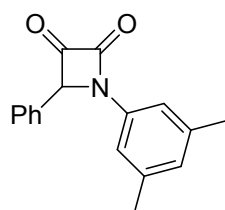

**1-(3,5-dimethylphenyl)-4-phenylazetidine-2,3-dione (1g):** This is a new compound. Yellow powder, 1.96 g, 0.74% yield. <sup>1</sup>H NMR (400 MHz, Chloroform-*d*) δ 7.45 – 7.34 (m, 3H), 7.35 – 7.28 (m, 2H), 7.15 – 7.09 (m, 2H), 6.86 (dt, *J* = 1.7, 0.8 Hz, 1H), 5.57 (s, 1H), 2.28 (s, 6H). <sup>13</sup>C NMR (101 MHz, Chloroform-*d*) δ 191.0, 160.6, 139.5, 136.3, 131.8, 129.4, 128.6, 126.2, 116.0, 74.9, 21.4. HRMS (ESI<sup>+</sup>), *m/z* 266.1171 ([M+H]<sup>+</sup>), calcd for C<sub>17</sub>H<sub>16</sub>NO<sub>2</sub><sup>+</sup>: 266.1176.

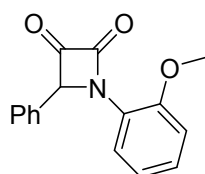

**1-(2-methoxyphenyl)-4-phenylazetidine-2,3-dione (1h):** This is a known compound. <sup>[4]</sup> Yellow powder, 1.52 g, 57% yield. <sup>1</sup>H NMR (400 MHz, Chloroform-*d*) δ 8.06 (dd, *J*

= 7.9, 1.7 Hz, 1H), 7.35 – 7.28 (m, 3H), 7.24 – 7.19 (m, 3H), 7.08– 6.98 (m, 1H), 6.89– 6.83 (m, 1H), 5.95 (s, 1H), 3.66 (s, 3H). <sup>13</sup>C NMR (101 MHz, Chloroform-*d*) δ 193.6, 162.3, 149.8, 133.6, 129.1, 129.0, 128.4, 126.4, 124.3, 123.2, 121.4, 112.3, 77.7, 55.6. HRMS (ESI<sup>+</sup>), *m/z* 268.0965 ([M+H]<sup>+</sup>), calcd for C<sub>16</sub>H<sub>14</sub>NO<sub>3</sub><sup>+</sup>: 268.0968.

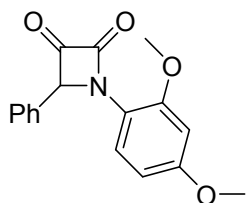

**1-(2,4-dimethoxyphenyl)-4-phenylazetidine-2,3-dione (1i):** This is a new compound. Yellow powder, 1.75 g, 59% yield. <sup>1</sup>H NMR (400 MHz, Chloroform-*d*) δ 7.93 (d, *J* = 8.8 Hz, 1H), 7.36 – 7.28 (m, 3H), 7.25 – 7.19 (m, 2H), 6.54 (dd, *J* = 8.8, 2.6 Hz, 1H), 6.40 (d, *J* = 2.6 Hz, 1H), 5.88 (s, 1H), 3.79 (s, 3H), 3.67 (s, 3H). <sup>13</sup>C NMR (101 MHz, Chloroform-*d*) δ 193.5, 162.0, 159.9, 151.4, 133.5, 129.0, 129.0, 126.5, 124.2, 117.7, 105.0, 99.7, 77.4, 55.6. HRMS (ESI<sup>+</sup>), *m/z* 298.1070 ([M+H]<sup>+</sup>), calcd for C<sub>17</sub>H<sub>16</sub>NO<sub>4</sub><sup>+</sup>: 298.1074.

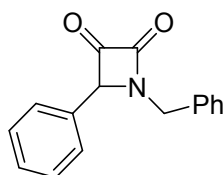

**1-benzyl-4-phenylazetidine-2,3-dione (1j):** This is a known compound. <sup>[5]</sup> White powder, 1.43 g, 57% yield. <sup>1</sup>H NMR (400 MHz, DMSO-*d*<sub>6</sub>) δ 7.44 – 7.14 (m, 10H), 5.29 (s, 1H), 5.02 (d, *J* = 15.3 Hz, 1H), 4.37 (d, *J* = 15.4 Hz, 1H). <sup>13</sup>C NMR (101 MHz, DMSO-*d*<sub>6</sub>) δ 195.0, 164.4, 134.7, 133.1, 129.5, 129.1, 128.8, 128.3, 127.6, 73.8, 45.4. HRMS (ESI<sup>+</sup>), *m/z* 252.1015 ([M+H]<sup>+</sup>), calcd for C<sub>16</sub>H<sub>14</sub>NO<sub>2</sub><sup>+</sup>: 252.1019.

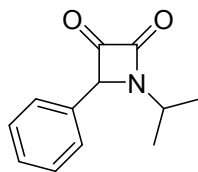

**1-isopropyl-4-phenylazetidine-2,3-dione (1k):** This is a known compound. <sup>[1a]</sup> White powder, 1.14 g, 56% yield. <sup>1</sup>H NMR (400 MHz, Chloroform-*d*)  $\delta$  7.48 – 7.36 (m, 3H), 7.34 – 7.25 (m, 2H), 5.13 (s, 1H), 4.19 (p, *J* = 6.7 Hz, 1H), 1.42 (d, *J* = 6.7 Hz, 3H), 1.17 (d, *J* = 6.7 Hz, 3H). <sup>13</sup>C NMR (101 MHz, Chloroform-*d*)  $\delta$  193.5, 163.9, 133.8, 129.5, 129.2, 127.1, 73.3, 46.6, 21.4, 20.1. HRMS (ESI<sup>+</sup>), *m/z* 204.1017 ([M+H]<sup>+</sup>), calcd for C<sub>12</sub>H<sub>14</sub>NO<sub>2</sub><sup>+</sup>: 204.1019.

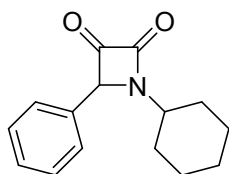

**1-cyclohexyl-4-phenylazetidine-2,3-dione (1l):** This is a known compound. <sup>[4]</sup> White powder, 1.85 g, 76% yield. <sup>1</sup>H NMR (400 MHz, Chloroform-*d*)  $\delta$  7.48 – 7.36 (m, 3H), 7.34 – 7.24 (m, 2H), 5.13 (s, 1H), 3.94 – 3.75 (m, 1H), 2.09 – 1.99 (m, 1H), 1.92 – 1.77 (m, 2H), 1.75 – 1.67 (m, 2H), 1.65 – 1.55 (m, 1H), 1.39 – 1.03 (m, 4H). <sup>13</sup>C NMR (101 MHz, Chloroform-*d*)  $\delta$  193.5, 164.0, 133.9, 129.5, 129.2, 127.1, 77.3, 73.5, 54.3, 31.6, 30.4, 25.0, 24.9. HRMS (ESI<sup>+</sup>), *m/z* 244.1328 ([M+H]<sup>+</sup>), calcd for C<sub>15</sub>H<sub>18</sub>NO<sub>2</sub><sup>+</sup>: 244.1332.

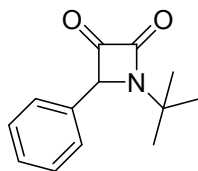

**1-(tert-butyl)-4-phenylazetidine-2,3-dione (1m):** This is a new compound. white powder, 1.56 g, 72% yield. <sup>1</sup>H NMR (400 MHz, Chloroform-*d*)  $\delta$  7.46 – 7.36 (m, 3H), 7.35 – 7.26 (m, 2H), 5.15 (s, 1H), 1.41 (s, 9H). <sup>13</sup>C NMR (101 MHz, Chloroform-*d*)  $\delta$  193.9, 163.7, 135.0, 129.4, 129.2, 127.0, 74.1, 56.8, 28.4. HRMS (ESI<sup>+</sup>), *m/z* 218.1173 ([M+H]<sup>+</sup>), calcd for C<sub>13</sub>H<sub>16</sub>NO<sub>2</sub><sup>+</sup>: 218.1176.



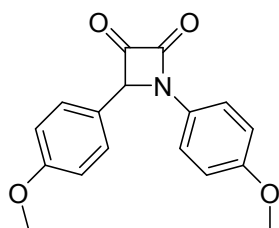

**1,4-bis(4-methoxyphenyl) azetidine-2,3-dione (1n):** This is a known compound. <sup>[1b]</sup> Yellow powder, 2.1 g, 72% yield. <sup>1</sup>H NMR (400 MHz, Chloroform-*d*) δ 7.46 (d, *J* = 9.1 Hz, 2H), 7.29 – 7.21 (m, 2H), 6.96 – 6.85 (m, 4H), 5.51 (s, 1H), 3.79 (s, 6H). <sup>13</sup>C NMR (101 MHz, Chloroform-*d*) δ 191.5, 160.6, 160.2, 157.9, 129.9, 127.8, 123.6, 119.8, 114.9, 114.7, 74.6, 55.5, 55.4. HRMS (ESI<sup>+</sup>), *m/z* 298.1070 ([M+H]<sup>+</sup>), calcd for C<sub>17</sub>H<sub>16</sub>NO<sub>4</sub><sup>+</sup>: 298.1074.

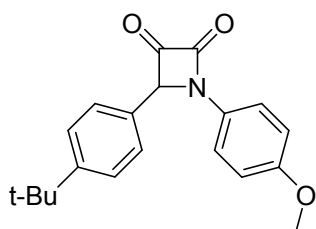

**4-(4-(tert-butyl)phenyl)-1-(4-methoxyphenyl)azetidine-2,3-dione (1o):** This is a new compound. Yellow powder, 2.4 g, 75% yield. <sup>1</sup>H NMR (400 MHz, Chloroform-*d*) δ 7.52 – 7.45 (m, 2H), 7.43 – 7.38 (m, 2H), 7.26 – 7.20 (m, 2H), 6.92 – 6.84 (m, 2H), 5.53 (s, 1H), 3.79 (s, 3H), 1.30 (s, 9H). <sup>13</sup>C NMR (101 MHz, Chloroform-*d*) δ 191.10, 160.12, 157.94, 152.71, 130.03, 128.61, 126.39, 126.09, 119.78, 114.74, 55.51, 34.74, 31.22. HRMS (ESI<sup>+</sup>), *m/z* 324.1591 ([M+H]<sup>+</sup>), calcd for C<sub>20</sub>H<sub>22</sub>NO<sub>3</sub><sup>+</sup>: 324.1594.

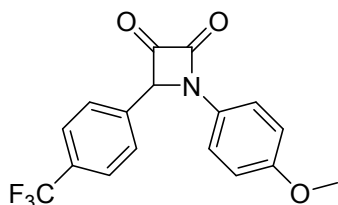

**1-(4-methoxyphenyl)-4-(4-(trifluoromethyl)phenyl)azetidine-2,3-dione (1p):** This is a new compound. Yellow powder, 1.87 g, 56% yield. <sup>1</sup>H NMR (400 MHz, Chloroform-*d*) δ 7.67 (d, *J* = 8.1 Hz, 2H), 7.49 – 7.38 (m, 4H), 6.96 – 6.86 (m, 2H),

5.62 (s, 1H), 3.80 (s, 3H).  $^{13}\text{C}$  NMR (101 MHz, Chloroform-*d*)  $\delta$  189.2, 159.5, 158.2, 135.7, 131.8, 131.5, 129.6, 126.6, {126.5, 126.4, 126.4, 126.4 (q,  $J = 3.5$  Hz)}, 125.0, 122.3, 119.7, 114.9, 74.2, 55.5. HRMS (ESI<sup>+</sup>),  $m/z$  336.0836 ([M+H]<sup>+</sup>), calcd for  $\text{C}_{17}\text{H}_{13}\text{F}_3\text{NO}_3^+$ : 336.0842.

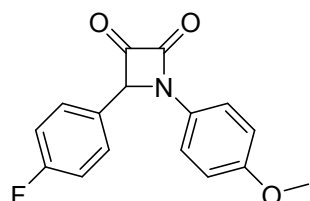

**4-(4-fluorophenyl)-1-(4-methoxyphenyl) azetidine-2,3-dione (1q):** This is a new compound. Yellow powder, 1.9 g, 67% yield.  $^1\text{H}$  NMR (400 MHz, Chloroform-*d*)  $\delta$  7.46 – 7.41 (m, 2H), 7.34 – 7.27 (m, 2H), 7.14 – 7.05 (m, 2H), 6.92 – 6.86 (m, 2H), 5.55 (s, 1H), 3.79 (s, 3H).  $^{13}\text{C}$  NMR (101 MHz, Chloroform-*d*)  $\delta$  190.5, 164.6, 162.1 (d,  $J = 250.5$  Hz), 159.8, 158.1, 129.8, 128.3, 128.2 (d,  $J = 9.1$  Hz), 127.6 (d,  $J = 3.0$  Hz), 119.7, 116.7, 116.5 (d,  $J = 22.2$  Hz), 114.8, 74.1, 55.5. HRMS (ESI<sup>+</sup>),  $m/z$  286.0871 ([M+H]<sup>+</sup>), calcd for  $\text{C}_{16}\text{H}_{13}\text{FNO}_3^+$ : 286.0874.

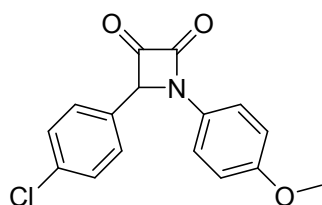

**4-(4-chlorophenyl)-1-(4-methoxyphenyl) azetidine-2,3-dione (1r):** This is a new compound. Yellow powder, 1.81 g, 60% yield.  $^1\text{H}$  NMR (400 MHz, Chloroform-*d*)  $\delta$  7.41 (dd,  $J = 18.8, 8.8$  Hz, 4H), 7.32 – 7.20 (m, 3H), 6.89 (d,  $J = 9.1$  Hz, 2H), 5.53 (s, 1H), 3.80 (s, 3H).  $^{13}\text{C}$  NMR (101 MHz, Chloroform-*d*)  $\delta$  190.0, 159.7, 158.1, 135.6, 130.3, 129.7, 129.7, 127.7, 119.7, 114.9, 55.5. HRMS (ESI<sup>+</sup>),  $m/z$  302.0575 ([M+H]<sup>+</sup>), calcd for  $\text{C}_{16}\text{H}_{13}\text{ClNO}_3^+$ : 302.0578.

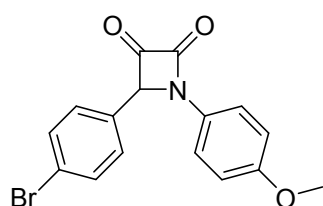

**4-(4-bromophenyl)-1-(4-methoxyphenyl) azetidine-2,3-dione (1s):** This is a known compound. <sup>12</sup> Yellow powder, 1.93 g, 56% yield. <sup>1</sup>H NMR (400 MHz, Chloroform-*d*) δ 7.60 – 7.51 (m, 2H), 7.47 – 7.36 (m, 2H), 7.25 – 7.14 (m, 2H), 6.95 – 6.85 (m, 2H), 5.51 (s, 1H), 3.80 (s, 3H). <sup>13</sup>C NMR (101 MHz, Chloroform-*d*) δ 189.9, 159.7, 158.1, 132.7, 130.8, 129.7, 127.9, 123.7, 119.7, 114.9, 55.6. HRMS (ESI<sup>+</sup>), *m/z* 346.0070 ([M+H]<sup>+</sup>), calcd for C<sub>16</sub>H<sub>13</sub>BrNO<sub>3</sub><sup>+</sup>: 346.0073.

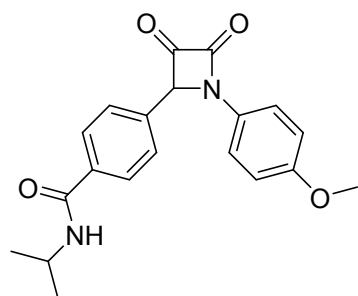

**4-(tert-butyl)-1-(4-methoxyphenyl)azetidine-2,3-dione (1t):** This is a new compound. Yellow powder, 1.4 g, 40% yield. <sup>1</sup>H NMR (400 MHz, Chloroform-*d*) δ 7.8 (d, *J* = 8.1 Hz, 2H), 7.4 (dd, *J* = 25.5, 8.6 Hz, 4H), 6.9 (d, *J* = 9.0 Hz, 2H), 6.1 (d, *J* = 7.4 Hz, 1H), 5.6 (s, 1H), 4.3 (dq, *J* = 13.3, 6.6 Hz, 1H), 3.8 (s, 3H), 1.2 (dd, *J* = 6.5, 1.8 Hz, 6H). <sup>13</sup>C NMR (101 MHz, Chloroform-*d*) δ 189.8, 165.9, 159.7, 158.1, 136.2, 134.9, 129.7, 128.0, 126.5, 119.7, 114.8, 74.5, 55.5, 42.1, 22.8. HRMS (ESI<sup>+</sup>), *m/z* 353.1490 ([M+H]<sup>+</sup>), calcd for C<sub>20</sub>H<sub>21</sub>N<sub>2</sub>O<sub>4</sub><sup>+</sup>: 353.1496.

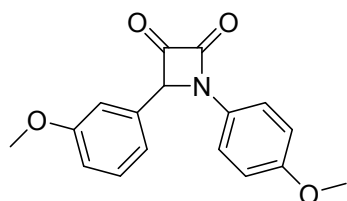

**4-(3-methoxyphenyl)-1-(4-methoxyphenyl)azetidine-2,3-dione (1u):** This is a new compound. Yellow powder, 1.9 g, 65% yield. <sup>1</sup>H NMR (400 MHz, Chloroform-*d*) δ 7.51 – 7.40 (m, 2H), 7.31 (t, *J* = 8.0 Hz, 1H), 6.97 – 6.76 (m, 5H), 5.51 (s, 1H), 3.79 (s, 3H), 3.78 (s, 3H). <sup>13</sup>C NMR (101 MHz, Chloroform-*d*) δ 190.5, 160.4, 160.0, 158.0, 133.3, 130.6, 129.9, 119.7, 118.6, 114.9, 114.8, 112.0, 55.5, 55.4. HRMS (ESI<sup>+</sup>), *m/z* 298.1070 ([M+H]<sup>+</sup>), calcd for C<sub>17</sub>H<sub>16</sub>NO<sub>4</sub><sup>+</sup>: 298.1074.

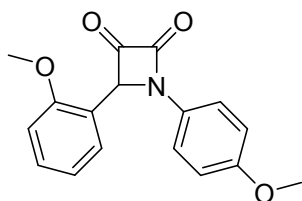

**4-(2-methoxyphenyl)-1-(4-methoxyphenyl)azetidine-2,3-dione (1v):** This is a new compound. Yellow powder, 2.1 g, 72% yield.  $^1\text{H}$  NMR (400 MHz, Chloroform-*d*)  $\delta$  7.48 – 7.42 (m, 2H), 7.38 – 7.30 (m, 1H), 7.30 – 7.23 (m, 1H), 7.01 – 6.92 (m, 1H), 6.92 – 6.87 (m, 1H), 6.87 – 6.81 (m, 2H), 5.71 (s, 1H), 3.81 (s, 3H), 3.76 (s, 3H).  $^{13}\text{C}$  NMR (101 MHz, Chloroform-*d*)  $\delta$  192.2, 160.8, 158.2, 157.6, 131.1, 130.3, 129.9, 121.1, 120.2, 119.4, 114.6, 111.6, 72.4, 55.9, 55.5. HRMS (ESI<sup>+</sup>),  $m/z$  298.1070 ([M+H]<sup>+</sup>), calcd for C<sub>17</sub>H<sub>16</sub>NO<sub>4</sub><sup>+</sup>: 298.1074.

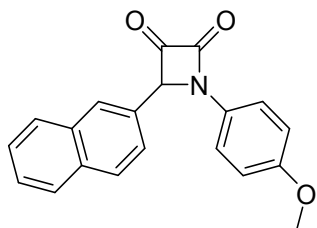

**1-(4-methoxyphenyl)-4-(naphthalen-2-yl)azetidine-2,3-dione (1w):** This is a new compound. Yellow powder, 2.6 g, 82% yield.  $^1\text{H}$  NMR (400 MHz, Chloroform-*d*)  $\delta$  7.92 – 7.77 (m, 4H), 7.57 – 7.46 (m, 4H), 7.41 – 7.34 (m, 1H), 6.91 – 6.82 (m, 2H), 5.70 (s, 1H), 3.76 (s, 3H).  $^{13}\text{C}$  NMR (101 MHz, Chloroform-*d*)  $\delta$  190.6, 160.1, 158.0, 133.7, 133.3, 130.0, 129.6, 129.3, 128.0, 127.9, 127.0, 126.4, 123.0, 119.8, 114.8, 55.5. HRMS (ESI<sup>+</sup>),  $m/z$  318.1119 ([M+H]<sup>+</sup>), calcd for C<sub>20</sub>H<sub>16</sub>NO<sub>3</sub><sup>+</sup>: 318.1125.

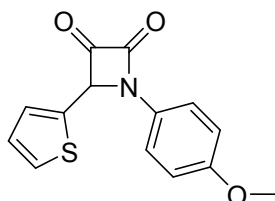

**1-(4-methoxyphenyl)-4-(thiophen-2-yl)azetidine-2,3-dione (1x):** This is a known compound.<sup>[3]</sup> Yellow powder, 1.91 g, 70% yield.  $^1\text{H}$  NMR (400 MHz, Chloroform-*d*)  $\delta$  7.54 – 7.47 (m, 2H), 7.36 (dd,  $J = 5.1, 1.2$  Hz, 1H), 7.16 (ddd,  $J = 3.6, 1.3, 0.6$  Hz, 1H),

7.05 (dd,  $J = 5.1, 3.6$  Hz, 1H), 6.93 – 6.85 (m, 2H), 5.82 (s, 1H), 3.80 (s, 3H).  $^{13}\text{C}$  NMR (101 MHz, Chloroform-*d*)  $\delta$  189.6, 159.6, 158.1, 134.7, 129.6, 127.8, 127.3, 127.2, 119.7, 114.8, 70.6, 55.5. HRMS (ESI<sup>+</sup>),  $m/z$  274.0529 ([M+H]<sup>+</sup>), calcd for  $\text{C}_{14}\text{H}_{12}\text{NO}_3\text{S}^+$ : 274.0532.

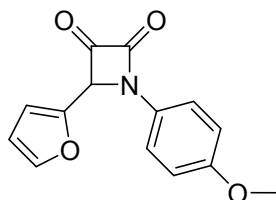

**4-(furan-2-yl)-1-(4-methoxyphenyl)azetidine-2,3-dione (1y):** This is a known compound.<sup>[4]</sup> Yellow powder, 1.54 g, 60% yield.  $^1\text{H}$  NMR (400 MHz, Chloroform-*d*)  $\delta$  7.6 – 7.5 (m, 2H), 7.5 – 7.4 (m, 1H), 7.0 – 6.8 (m, 2H), 6.6 (d,  $J = 3.3$  Hz, 1H), 6.4 (dd,  $J = 3.3, 1.9$  Hz, 1H), 5.6 (s, 1H), 3.8 (s, 3H).  $^{13}\text{C}$  NMR (101 MHz, Chloroform-*d*)  $\delta$  189.3, 159.8, 158.1, 145.3, 144.3, 130.0, 119.3, 114.7, 111.6, 111.0, 68.1, 55.5.

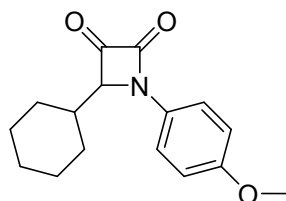

**4-cyclohexyl-1-(4-methoxyphenyl)azetidine-2,3-dione (1z):** This is a new compound. Yellow powder, 1.93 g, 71% yield.  $^1\text{H}$  NMR (400 MHz, Chloroform-*d*)  $\delta$  7.60 – 7.45 (m, 2H), 7.02 – 6.91 (m, 2H), 4.56 (d,  $J = 4.0$  Hz, 1H), 3.84 (s, 3H), 2.21 – 2.07 (m, 1H), 1.87 – 1.62 (m, 5H), 1.54 – 0.77 (m, 5H).  $^{13}\text{C}$  NMR (101 MHz, Chloroform-*d*)  $\delta$  195.4, 159.8, 158.0, 130.1, 119.3, 114.8, 55.6, 36.8, 28.9, 27.1, 26.1, 25.9, 25.6. HRMS (ESI<sup>+</sup>),  $m/z$  274.1432 ([M+H]<sup>+</sup>), calcd for  $\text{C}_{16}\text{H}_{20}\text{NO}_3^+$ : 274.1438.

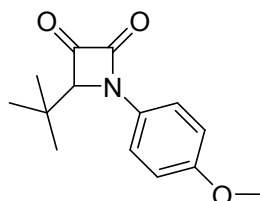

**4-(tert-butyl)-1-(4-methoxyphenyl)azetidine-2,3-dione (1aa):** This is a known compound.<sup>[4]</sup> Yellow powder, 1.85 g, 75% yield.  $^1\text{H}$  NMR (400 MHz, Chloroform-*d*)  $\delta$  7.5 – 7.4 (m, 2H), 7.0 (d,  $J = 9.0$  Hz, 2H), 4.6 (s, 1H), 3.8 (s, 3H), 1.1 (s, 9H).  $^{13}\text{C}$  NMR

(101 MHz, Chloroform-*d*)  $\delta$  195.7, 161.0, 158.1, 129.7, 121.5, 114.5, 80.4, 55.6, 35.2, 27.0.

### 3. Detailed Optimization of the Reaction Conditions.

Table S1. Evaluation of the effects of ligands in the Ir-Catalyzed Hydrogenation of **1a**<sup>a</sup>

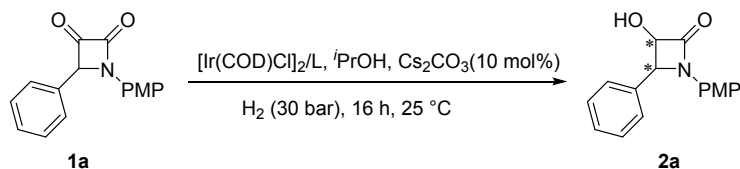

| entry | L                | conv. (%) <sup>b</sup> | dr <sup>c</sup> | ee (%) <sup>d</sup> |
|-------|------------------|------------------------|-----------------|---------------------|
| 1     | <i>f</i> -amphox | >99                    | >20:1           | 1                   |
| 2     | <i>f</i> -amphol | 42                     | >20:1           | 2                   |
| 3     | <i>f</i> -ampha  | 26                     | >20:1           | 13                  |

<sup>a</sup> Reaction conditions: 0.1 mmol of substrate **1a**, 0.25 mol % [Ir(COD)Cl]<sub>2</sub>, 0.5 mol % ligand, 10 mol % Cs<sub>2</sub>CO<sub>3</sub>, *i*PrOH (1.0 mL). <sup>b</sup> Conversions were determined by <sup>1</sup>H NMR spectroscopy. <sup>c</sup> Diastereomeric ratio (dr) were determined by <sup>1</sup>H NMR spectroscopy. <sup>d</sup> Enantiomeric excesses (ee) were determined by HPLC analysis using a chiral stationary phase.

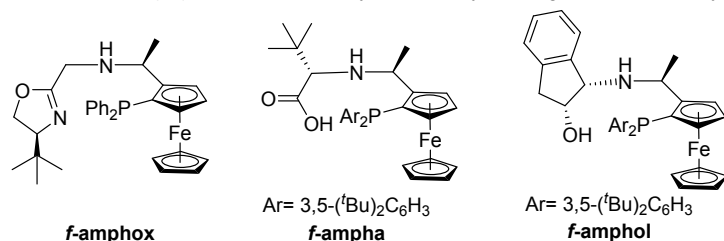

Table S2. Evaluation of the effects of additive in the Ru-Catalyzed Hydrogenation of **1a**<sup>a</sup>

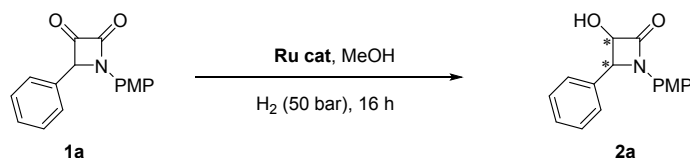

| entry | Ru cat                                                            | additive                             | temp. (°C) | conv.% <sup>b</sup> | dr <sup>c</sup> | ee (%) <sup>d</sup> |
|-------|-------------------------------------------------------------------|--------------------------------------|------------|---------------------|-----------------|---------------------|
| 1     | RuCl <sub>2</sub> (Ph-C <sub>3</sub> -TunePhos)(DMF) <sub>2</sub> | -                                    | 50         | >95                 | >20:1           | 5                   |
| 2     | Ru(OAc) <sub>2</sub> (Ph-C <sub>3</sub> -TunePhos)                | -                                    | 50         | >95                 | >20:1           | 8                   |
| 3     | RuCl <sub>2</sub> (Ph-C <sub>3</sub> -TunePhos)(DMF) <sub>2</sub> | CeCl <sub>3</sub> ·7H <sub>2</sub> O | 25         | >95                 | >20:1           | 7                   |
| 4     | RuCl <sub>2</sub> (Ph-C <sub>3</sub> -TunePhos)(DMF) <sub>2</sub> | <i>p</i> -TsOH·H <sub>2</sub> O      | 25         | 56                  | >20:1           | 10                  |
| 5     | RuCl <sub>2</sub> (Ph-C <sub>3</sub> -TunePhos)(DMF) <sub>2</sub> | AcOH                                 | 25         | 53                  | >20:1           | 33                  |

<sup>a</sup> Reaction conditions: **1a** (0.1 mmol), [Ru] (1 mol%), additive (10 mol%) in MeOH (1 mL) for 16 h. <sup>b</sup> Conversions were determined by <sup>1</sup>H NMR spectroscopy. <sup>c</sup> Diastereomeric ratio (dr) were determined by <sup>1</sup>H NMR spectroscopy. <sup>d</sup> Enantiomeric excesses (ee) were determined by HPLC analysis using a chiral stationary phase.

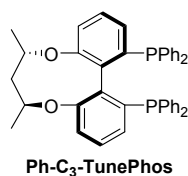

Table S3. Evaluation of the effects of additive in the Ru-Catalyzed Hydrogenation of **1a**<sup>a</sup>

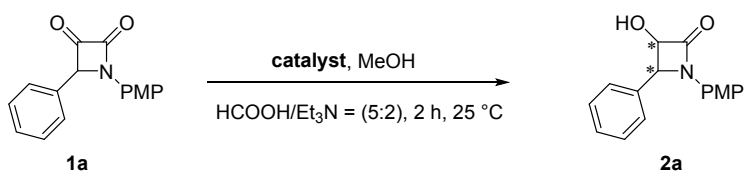

| entry | catalyst     | conv.(%) <sup>b</sup> | dr <sup>c</sup> | ee (%) <sup>d</sup> |
|-------|--------------|-----------------------|-----------------|---------------------|
| 1     | <b>cat.1</b> | >95                   | >20:1           | 0                   |
| 2     | <b>cat.2</b> | >95                   | >20:1           | 3                   |
| 3     | <b>cat.3</b> | >95                   | >20:1           | 2                   |
| 4     | <b>cat.4</b> | >95                   | >20:1           | 1                   |

<sup>a</sup> Reaction conditions: **1a** (0.1 mmol), catalyst (1 mol%), HCOOH/Et<sub>3</sub>N = (5:2) (25  $\mu$ L), MeOH (1 mL), 2 h. <sup>b</sup> Conversions were determined by <sup>1</sup>H NMR spectroscopy. <sup>c</sup> Diastereomeric ratio (dr) were determined by <sup>1</sup>H NMR spectroscopy. <sup>d</sup> Enantiomeric excesses (ee) were determined by HPLC analysis using a chiral stationary phase.

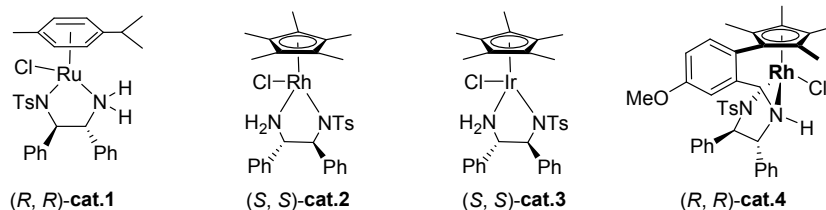



Table S4. Evaluation of the effects of ligands in the Ni-Catalyzed Hydrogenation of **1a**<sup>a</sup>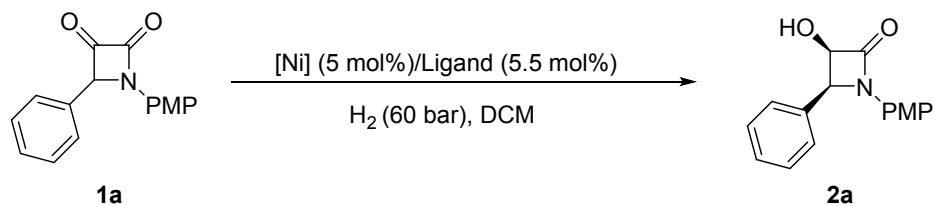

| entry | [Ni]                  | Ligand                         | T (°C) | time (h) | conv. (%) <sup>b</sup> | dr <sup>c</sup> | ee (%) <sup>d</sup> |
|-------|-----------------------|--------------------------------|--------|----------|------------------------|-----------------|---------------------|
| 1     | Ni(OAc) <sub>2</sub>  | (S)-Ph-BPE                     | 80     | 24       | <5                     | --              | --                  |
| 2     | Ni(OAc) <sub>2</sub>  | (S,S)-Me-DuPhos                | 80     | 24       | <5                     | --              | --                  |
| 3     | Ni(OAc) <sub>2</sub>  | (S)-SegPhos                    | 80     | 24       | <5                     | --              | --                  |
| 4     | Ni(OAc) <sub>2</sub>  | (R)-Binap                      | 80     | 24       | <5                     | --              | --                  |
| 5     | Ni(OAc) <sub>2</sub>  | (R, S)-JosiPhos                | 80     | 24       | 18                     | 5:1             | 23                  |
| 6     | Ni(OAc) <sub>2</sub>  | (R, R)-QuinoxP*                | 80     | 24       | 19                     | >20:1           | 77                  |
| 7     | Ni(OAc) <sub>2</sub>  | (S)-Binapine                   | 80     | 24       | 35                     | >20:1           | 95                  |
| 8     | Ni(OAc) <sub>2</sub>  | (R <sub>c</sub> , Sp)-DuanPhos | 80     | 24       | 41                     | >20:1           | 79                  |
| 9     | Ni(OAc) <sub>2</sub>  | (S)-Binapine                   | 65     | 36       | 17                     | >20:1           | 90                  |
| 10    | Ni(OAc) <sub>2</sub>  | (R <sub>c</sub> , Sp)-DuanPhos | 65     | 36       | 50                     | >20:1           | 85                  |
| 11    | Ni(OAc) <sub>2</sub>  | (S)-Binapine                   | 75     | 48       | 43                     | >20:1           | 95                  |
| 12    | Ni(OAc) <sub>2</sub>  | (R <sub>c</sub> , Sp)-DuanPhos | 75     | 48       | 47                     | >20:1           | 82                  |
| 13    | Ni(OAc) <sub>2</sub>  | (S)-Binapine                   | 100    | 24       | 58                     | >20:1           | 95                  |
| 14    | Ni(OAc) <sub>2</sub>  | (R <sub>c</sub> , Sp)-DuanPhos | 100    | 24       | 87                     | >20:1           | 31                  |
| 15    | Ni(OAc) <sub>2</sub>  | (S)-Binapine                   | 100    | 36       | 85                     | >20:1           | 37                  |
| 16    | Ni(OAc) <sub>2</sub>  | (S)-Binapine                   | 100    | 72       | >95                    | >20:1           | 12                  |
| 17    | Ni(OTf) <sub>2</sub>  | (S)-Binapine                   | 100    | 48       | 95                     | 4:1             | rac                 |
| 18    | Ni(COD) <sub>2</sub>  | (S)-Binapine                   | 100    | 48       | 23                     | >20:1           | 94                  |
| 19    | Ni(acac) <sub>2</sub> | (S)-Binapine                   | 100    | 48       | 89                     | >20:1           | 58                  |

<sup>a</sup> All reactions were carried out with a Ni(OAc)<sub>2</sub>/(S)-Binapine/substrate (0.1 mmol) ratio of 1:1.1:20 on 0.1 mmol scale. The catalyst was pre-complexed in DCM (0.1 mL for each reaction vial). <sup>b</sup> Conversions were determined by <sup>1</sup>H NMR spectroscopy. <sup>c</sup> Diastereomeric ratio (dr) were determined by <sup>1</sup>H NMR spectroscopy <sup>d</sup> Enantiomeric excesses (ee) were determined by HPLC analysis using a chiral stationary phase.

Table S5. Evaluation of the effects of solvents in the Ni-Catalyzed Hydrogenation of **1a**<sup>a</sup>

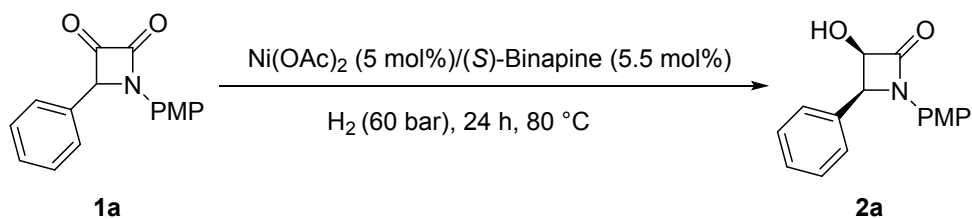

| entry | solvent              | conv. (%) <sup>b</sup> | dr <sup>c</sup> | ee (%) <sup>d</sup> |
|-------|----------------------|------------------------|-----------------|---------------------|
| 1     | DCM                  | 42                     | >20:1           | 95                  |
| 2     | THF                  | 35                     | >20:1           | 93                  |
| 3     | toluene              | 23                     | >20:1           | 96                  |
| 4     | dioxane              | 38                     | >20:1           | 80                  |
| 5     | EA                   | 30                     | >20:1           | 92                  |
| 6     | MeCN                 | 18                     | >20:1           | 74                  |
| 7     | hexane               | <5                     | --              | --                  |
| 8     | MeOH                 | messy                  | --              | --                  |
| 9     | IPA                  | messy                  | --              | --                  |
| 10    | CF <sub>3</sub> COOH | messy                  | --              | --                  |

<sup>a</sup> All reactions were carried out with a Ni(OAc)<sub>2</sub>/(*S*)-Binapine/substrate ratio of 1:1.1:20 on 0.1 mmol scale. The catalyst was pre-complexed in DCM (0.1 mL for each reaction vial). <sup>b</sup> Conversions were determined by <sup>1</sup>H NMR spectroscopy. <sup>c</sup> Diastereomeric ratio (dr) were determined by <sup>1</sup>H NMR spectroscopy. <sup>d</sup> Enantiomeric excesses (ee) were determined by HPLC analysis using a chiral stationary phase.

Table S6. Evaluation of the effects of additives in the Ni-Catalyzed DKR of **1a**<sup>a</sup>

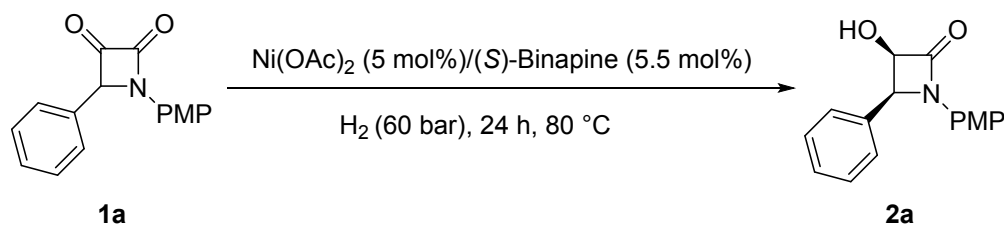

| entry           | additive                          | conv.(%) <sup>b</sup> | dr <sup>c</sup> | ee(%) <sup>d</sup> |
|-----------------|-----------------------------------|-----------------------|-----------------|--------------------|
| 1               | DBU                               | messy                 | --              | --                 |
| 2               | K <sub>2</sub> CO <sub>3</sub>    | messy                 | --              | --                 |
| 3               | NaBAR <sub>F</sub>                | 84                    | 3:1             | 45                 |
| 4               | AgOTf                             | >95                   | 9:1             | 3                  |
| 5               | AlCl <sub>3</sub>                 | <5                    | --              | --                 |
| 6 <sup>e</sup>  | TsOH•H <sub>2</sub> O             | 56                    | >20:1           | 79                 |
| 7               | TsOH•H <sub>2</sub> O             | >95                   | >20:1           | 8                  |
| 8               | AcOH                              | 56                    | >20:1           | 45                 |
| 9 <sup>e</sup>  | BF <sub>3</sub> •OEt <sub>2</sub> | >95                   | 1.3:1           | 3                  |
| 10 <sup>f</sup> | <b>A1</b>                         | messy                 | --              | --                 |
| 11 <sup>f</sup> | <b>A2</b>                         | 75                    | >20:1           | 65                 |
| 12 <sup>f</sup> | <b>A3</b>                         | 7                     | >20:1           | 25                 |
| 13 <sup>f</sup> | <b>A4</b>                         | >95                   | >20:1           | 81                 |
| 14              | <b>A4</b>                         | >95                   | >20:1           | 83.5               |
| 15 <sup>g</sup> | <b>A4</b>                         | 85                    | >20:1           | 93                 |

<sup>a</sup> All reactions were carried out with a Ni(OAc)<sub>2</sub>/(*S*)-Binapine/substrate ratio of 1:1.1:20 on 0.1 mmol scale. Unless otherwise mentioned, the additives were 1.0 equiv. The catalyst was pre-complexed in DCM (0.1 mL for each reaction vial). Another 0.9 mL DCM for each entry <sup>b</sup> Conversions were determined by <sup>1</sup>H NMR spectroscopy. <sup>c</sup> Diastereomeric ratios (dr) were determined by <sup>1</sup>H NMR spectroscopy <sup>d</sup> Enantiomeric excesses (ee) were determined by HPLC analysis using a chiral stationary phase. <sup>e</sup> 0.1 equiv of additive was added. <sup>f</sup> 2.0 equiv of additive was added. <sup>g</sup> 0.5 equiv of additive was added.

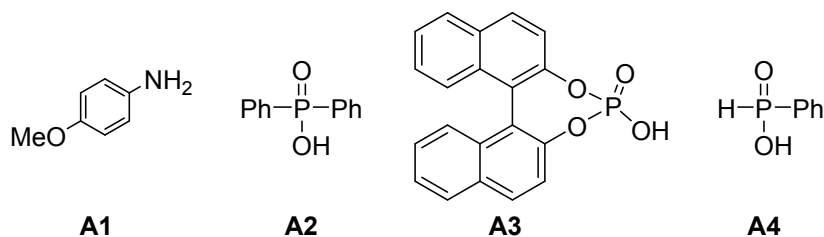

**Table S7.** Further evaluation of the effects of solvents in the Ni-Catalyzed DKR of **1a**<sup>a</sup>

$\text{Ph}-\text{P}(=\text{O})(\text{OH})_2$  (100 mol%)

$\text{Ni}(\text{OAc})_2$  (5 mol%)/(*S*)-Binapine (5.5 mol%)

$\text{H}_2$  (60 bar), 24 h, 80 °C

| entry                | solvent         | conv. (%) <sup>b</sup> | dr <sup>c</sup> | ee(%) <sup>d</sup> |
|----------------------|-----------------|------------------------|-----------------|--------------------|
| 1                    | DCM             | 92                     | >20:1           | 86                 |
| 2                    | THF             | >95                    | >20:1           | 90.5               |
| 3                    | toluene         | 95                     | >20:1           | 92                 |
| <b>4<sup>e</sup></b> | <b>toluene</b>  | <b>&gt;95</b>          | >20:1           | <b>91</b>          |
| 5                    | $\text{CHCl}_3$ | 92                     | >20:1           | 86                 |
| 6                    | hexane          | 80                     | >20:1           | 39                 |
| 7                    | MTBE            | >95                    | >20:1           | 90                 |

<sup>a</sup> All reactions were carried out with a  $\text{Ni}(\text{OAc})_2$ /*S*-Binapine/substrate ratio of 1:1.1:20 on 0.1 mmol scale. The additive was 1.0 equiv. of the substrate. The catalyst was pre-complexed in DCM (0.1 mL for each reaction vial), 0.9 mL other solvent for each. <sup>b</sup> Conversions were determined by <sup>1</sup>H NMR spectroscopy. <sup>c</sup> Diastereomeric ratios (dr) were determined by <sup>1</sup>H NMR spectroscopy. <sup>d</sup> Enantiomeric excesses (ee) were determined by HPLC analysis using a chiral stationary phase. <sup>e</sup> The reaction time was 36 h.

#### 4. General Procedure for the Asymmetric Hydrogenation via DKR.

A stock solution was prepared by mixing Ni(OAc)<sub>2</sub> (9.0 mg, 0.05 mmol) with (*S*)-Binapine (40 mg, 0.055 mmol) in a 1:1.1 molar ratio in DCM (1 mL at room temperature for 30 min in an argon-filled glovebox. An aliquot of the catalyst solution (0.1 mL, 0.005 mmol) was transferred by syringe into the vials charged with different substrates (0.1 mmol for each) and additive **A4** (0.1 mmol for each) in anhydrous toluene (0.9 mL). The vials were subsequently transferred into an autoclave into which hydrogen gas was charged. The reaction was then stirred under H<sub>2</sub> (60 bar) at 80 °C for 36 h. The hydrogen gas was released slowly and carefully after cooled the autoclave to room temperature. The reaction solution was concentrated and the residue was passed through a short column of silica gel (eluent: EA:PE = 5:1 to 2:1) to remove the metal complex and the additive. The ee values of compounds **2** were determined by HPLC analysis on a chiral stationary phase. The physical data were identical in all respect to those previously reported.

#### Characterization Data of 3-hydroxy- $\beta$ -Lactams

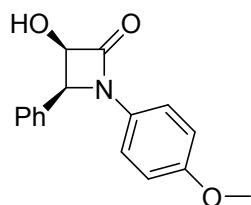

**(3*R*,4*S*)-3-hydroxy-1-(4-methoxyphenyl)-4-phenylazetidin-2-one (2a):** This is a known compound. <sup>[3]</sup> White solid; 23 mg, 87%; 91% ee; [ $\alpha$ ]<sub>D</sub><sup>20</sup> = +81.1 (c 1.0, CHCl<sub>3</sub>); The enantiomeric excess was determined by HPLC on Chiralpak IA column, hexane: isopropanol = 85:15; flow rate = 1.0 mL/min; UV detection at 254 nm; t<sub>R</sub> = 12.1 min (major), 19.3 min (minor). <sup>1</sup>H NMR (400 MHz, Chloroform-*d*)  $\delta$  7.45 – 7.27 (m, 7H), 6.80 (d, *J* = 9.0 Hz, 2H), 5.26 (d, *J* = 5.2 Hz, 1H), 5.18 (dd, *J* = 8.7, 5.2 Hz, 1H), 3.75 (s, 3H), 2.61 (d, *J* = 8.4 Hz, 1H). <sup>13</sup>C NMR (101 MHz, Chloroform-*d*)  $\delta$  165.5, 156.5, 133.2, 130.5, 129.1, 128.9, 127.5, 118.9, 114.4, 77.2, 62.3, 55.5. HRMS (ESI<sup>+</sup>), *m/z* 270.1120 ([M+H]<sup>+</sup>), calcd for C<sub>16</sub>H<sub>16</sub>NO<sub>3</sub><sup>+</sup>: 270.1125.

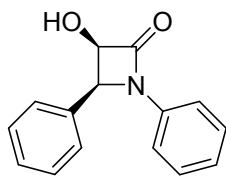

**(3R,4S)-3-hydroxy-1,4-diphenylazetidin-2-one (2b):** This is a known compound. <sup>[11]</sup> White solid, 22 mg, 90% yield, 89% ee,  $[\alpha]_D^{20} = +92.8$  (c 0.5, CHCl<sub>3</sub>); The enantiomeric excess was determined by HPLC on Chiralpak IA column, hexane: isopropanol = 90:10; flow rate = 1.0 mL/min; UV detection at 254 nm;  $t_R = 11.9$  min (major), 12.8 min (minor). <sup>1</sup>H NMR (400 MHz, Chloroform-*d*)  $\delta$  7.45 – 7.37 (m, 3H), 7.34 (dd,  $J = 7.3, 1.5$  Hz, 4H), 7.30 – 7.24 (m, 2H), 7.12 – 7.05 (m, 1H), 5.30 (d,  $J = 5.3$  Hz, 1H), 5.19 (dd,  $J = 8.3, 5.3$  Hz, 1H), 2.89 (d,  $J = 8.4$  Hz, 1H). <sup>13</sup>C NMR (101 MHz, Chloroform-*d*)  $\delta$  166.2, 137.0, 133.0, 129.2, 129.2, 129.0, 127.5, 124.6, 117.6, 77.1, 62.2. HRMS (ESI<sup>+</sup>),  $m/z$  240.1016 ([M+H]<sup>+</sup>), calcd for C<sub>15</sub>H<sub>14</sub>NO<sub>2</sub><sup>+</sup>: 240.1019.

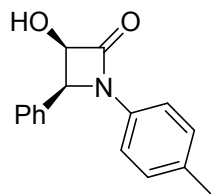

**(3R,4S)-3-hydroxy-4-phenyl-1-(*p*-tolyl)azetidin-2-one (2c):** This is a known compound. <sup>[11]</sup> White solid, 22 mg, 87% yield, 92% ee,  $[\alpha]_D^{20} = +58.6$  (c 0.5, CHCl<sub>3</sub>); The enantiomeric excess was determined by HPLC on Chiralpak IA column, hexane: isopropanol = 85:15; flow rate = 1.0 mL/min; UV detection at 254 nm;  $t_R = 8.8$  min (major), 15.3 min (minor). <sup>1</sup>H NMR (400 MHz, Chloroform-*d*)  $\delta$  7.45 – 7.29 (m, 5H), 7.25 – 7.19 (m, 2H), 7.06 (d,  $J = 8.3$  Hz, 2H), 5.27 (d,  $J = 5.3$  Hz, 1H), 5.18 (s, 1H), 2.95 (s, 1H), 2.27 (s, 3H). <sup>13</sup>C NMR (101 MHz, Chloroform-*d*)  $\delta$  166.2, 134.5, 134.3, 133.2, 129.7, 129.1, 128.9, 127.5, 117.5, 77.1, 62.2, 20.9. HRMS (ESI<sup>+</sup>),  $m/z$  254.1171 ([M+H]<sup>+</sup>), calcd for C<sub>16</sub>H<sub>16</sub>NO<sub>2</sub><sup>+</sup>: 254.1176.

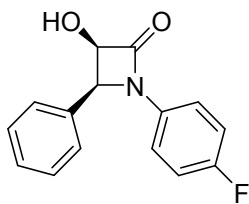

**(3R,4S)-1-(4-fluorophenyl)-3-hydroxy-4-phenylazetidin-2-one (2d):** This is a known compound. <sup>[1a]</sup> White solid, 23 mg, 90% yield, 87% ee, [ $\alpha$ ]<sup>20</sup><sub>D</sub> = +108.4 (c 0.5, CHCl<sub>3</sub>); The enantiomeric excess was determined by HPLC on Chiralpak IA column, hexane: isopropanol = 85:15; flow rate = 1.0 mL/min; UV detection at 254 nm;  $t_R$  = 8.1 min (major), 10.0 min (minor). <sup>1</sup>H NMR (400 MHz, Chloroform-*d*)  $\delta$  7.47 – 7.27 (m, 7H), 7.01 – 6.88 (m, 2H), 5.30 – 5.15 (m, 2H), 3.53 (d,  $J$  = 7.8 Hz, 1H). <sup>13</sup>C NMR (101 MHz, Chloroform-*d*)  $\delta$  166.3, 160.6, 158.2 (d,  $J$  = 245.4 Hz), 133.2 (d,  $J$  = 3.0 Hz), 132.8, 129.1, 129.0, 127.6, 119.1, 119.0 (d,  $J$  = 8.1 Hz), 116.2, 115.9 (d,  $J$  = 22.2 Hz), 77.2, 62.6. HRMS (ESI<sup>+</sup>),  $m/z$  258.0922 ([M+H]<sup>+</sup>), calcd for C<sub>15</sub>H<sub>13</sub>FNO<sub>2</sub><sup>+</sup>: 258.0925.

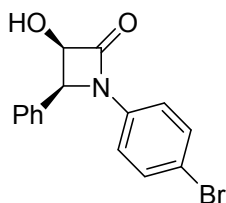

**(3R,4S)-1-(4-bromophenyl)-3-hydroxy-4-phenylazetidin-2-one (2e):** This is a new compound. White solid, 27 mg, 85% yield, 84% ee, [ $\alpha$ ]<sup>20</sup><sub>D</sub> = +112.4 (c 0.5, CHCl<sub>3</sub>); The enantiomeric excess was determined by HPLC on Chiralpak IA column, hexane: isopropanol = 85:15; flow rate = 1.0 mL/min; UV detection at 254 nm;  $t_R$  = 9.5 min (major), 15.2 min (minor). <sup>1</sup>H NMR (400 MHz, Chloroform-*d*)  $\delta$  7.46 – 7.34 (m, 5H), 7.33 – 7.27 (m, 2H), 7.24 – 7.16 (m, 2H), 5.27 (d,  $J$  = 5.3 Hz, 1H), 5.20 (dd,  $J$  = 7.6, 5.2 Hz, 1H), 3.06 (d,  $J$  = 8.3 Hz, 1H). <sup>13</sup>C NMR (101 MHz, Chloroform-*d*)  $\delta$  166.3, 135.9, 132.5, 132.2, 129.2, 129.1, 127.5, 119.1, 117.3, 77.3, 62.4. HRMS (ESI<sup>+</sup>),  $m/z$  318.0122 ([M+H]<sup>+</sup>), calcd for C<sub>15</sub>H<sub>13</sub>BrNO<sub>2</sub><sup>+</sup>: 318.0124.

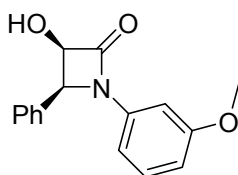

**(3*R*,4*S*)-3-hydroxy-1-(3-methoxyphenyl)-4-phenylazetidin-2-one (2f):** This is a known compound. <sup>[11]</sup> White solid, 22 mg, 82% yield, 84% ee,  $[\alpha]_D^{20} = +60.0$  (c 0.5, CHCl<sub>3</sub>); The enantiomeric excess was determined by HPLC on Chiralpak OD-3 column, hexane: isopropanol = 90:10; flow rate = 1.0 mL/min; UV detection at 254 nm;  $t_R = 12.2$  min (minor), 14.8 min (major). <sup>1</sup>H NMR (600 MHz, Chloroform-*d*)  $\delta$  7.45 – 7.36 (m, 3H), 7.36 – 7.31 (m, 2H), 7.15 (t,  $J = 8.2$  Hz, 1H), 7.05 (t,  $J = 2.3$  Hz, 1H), 6.80 (dd,  $J = 8.1, 2.0$  Hz, 1H), 6.64 (dd,  $J = 8.3, 2.5$  Hz, 1H), 5.29 (d,  $J = 5.4$  Hz, 1H), 5.18 (d,  $J = 5.4$  Hz, 1H), 3.75 (s, 3H), 2.56 (s, 1H). <sup>13</sup>C NMR (151 MHz, Chloroform-*d*)  $\delta$  166.1, 160.2, 138.1, 132.9, 130.0, 129.2, 129.0, 127.4, 110.4, 109.8, 103.6, 77.1, 62.3, 55.3. HRMS (ESI<sup>+</sup>),  $m/z$  270.1120 ( $[M+H]^+$ ), calcd for C<sub>16</sub>H<sub>16</sub>NO<sub>3</sub><sup>+</sup>: 270.1125.

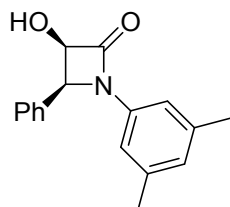

**(3*R*,4*S*)-1-(3,5-dimethylphenyl)-3-hydroxy-4-phenylazetidin-2-one (2g):** This is a new compound. White solid, 22 mg, 81% yield, 90% ee,  $[\alpha]_D^{20} = +86.6$  (c 0.5, CHCl<sub>3</sub>); The enantiomeric excess was determined by HPLC on Chiralpak OD-3 column, hexane: isopropanol = 90:10; flow rate = 1.0 mL/min; UV detection at 254 nm;  $t_R = 8.2$  min (minor), 9.6 min (major). <sup>1</sup>H NMR (400 MHz, Chloroform-*d*)  $\delta$  7.45 – 7.36 (m, 3H), 7.33 (dd,  $J = 7.9, 1.7$  Hz, 2H), 7.00 – 6.95 (m, 2H), 6.73 (s, 1H), 5.28 (d,  $J = 5.3$  Hz, 1H), 5.15 (d,  $J = 5.4$  Hz, 1H), 2.61 (s, 1H), 2.23 (s, 6H). <sup>13</sup>C NMR (101 MHz, Chloroform-*d*)  $\delta$  166.2, 139.0, 136.9, 133.2, 129.1, 128.8, 127.3, 126.4, 115.2, 76.9, 62.1, 21.3. HRMS (ESI<sup>+</sup>),  $m/z$  268.1328 ( $[M+H]^+$ ), calcd for C<sub>17</sub>H<sub>18</sub>NO<sub>2</sub><sup>+</sup>: 268.1332.

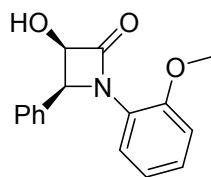



**(3*R*,4*S*)-3-hydroxy-1-(2-methoxyphenyl)-4-phenylazetidin-2-one (2h):** This is a new compound. White solid, 23 mg, 85% yield, 89% ee,  $[\alpha]_D^{20} = +49.7$  (c 0.3, CHCl<sub>3</sub>); The enantiomeric excess was determined by HPLC on Chiralpak IA column, hexane: isopropanol = 90:10; flow rate = 1.0 mL/min; UV detection at 254 nm;  $t_R = 14.5$  min (major), 16.3 min (minor). <sup>1</sup>H NMR (600 MHz, Chloroform-*d*)  $\delta$  8.02 – 7.94 (m, 1H), 7.38 – 7.33 (m, 2H), 7.33 – 7.27 (m, 3H), 7.12 – 7.06 (m, 1H), 6.98 – 6.93 (m, 1H), 6.80 (d, *J* = 8.2 Hz, 1H), 5.66 (d, *J* = 5.3 Hz, 1H), 5.21 (d, *J* = 5.3 Hz, 1H), 3.59 (s, 3H), 2.75 (s, 1H). <sup>13</sup>C NMR (101 MHz, Chloroform-*d*)  $\delta$  167.9, 150.5, 135.1, 128.8, 128.4, 127.3, 126.3, 125.3, 123.3, 121.1, 112.1, 78.1, 65.9, 55.5. HRMS (ESI<sup>+</sup>), *m/z* 270.1120 ([*M*+*H*]<sup>+</sup>), calcd for C<sub>16</sub>H<sub>16</sub>NO<sub>3</sub><sup>+</sup>: 270.1125.

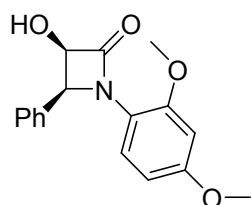

**(3*R*,4*S*)-1-(2,4-dimethoxyphenyl)-3-hydroxy-4-phenylazetidin-2-one (2i):** This is a new compound. White solid, 26 mg, 88% yield, 91% ee,  $[\alpha]_D^{20} = +47.0$  (c 0.5, CHCl<sub>3</sub>); The enantiomeric excess was determined by HPLC on Chiralpak IA column, hexane: isopropanol = 85:15; flow rate = 1.0 mL/min; UV detection at 254 nm;  $t_R = 14.1$  min (major), 19.8 min (minor). <sup>1</sup>H NMR (600 MHz, Chloroform-*d*)  $\delta$  7.77 (dd, *J* = 8.7, 1.5 Hz, 1H), 7.36 (dd, *J* = 8.3, 6.4 Hz, 2H), 7.33 – 7.27 (m, 3H), 6.46 (dd, *J* = 8.8, 2.6 Hz, 1H), 6.37 (d, *J* = 2.6 Hz, 1H), 5.57 (d, *J* = 5.2 Hz, 1H), 5.20 (dd, *J* = 8.0, 5.1 Hz, 1H), 3.75 (s, 3H), 3.62 (s, 3H), 2.69 (d, *J* = 8.2 Hz, 1H). <sup>13</sup>C NMR (151 MHz, Chloroform-*d*)  $\delta$  167.8, 158.5, 152.4, 135.0, 128.8, 128.4, 127.5, 124.7, 118.4, 104.5, 99.8, 78.1, 65.6, 55.5. HRMS (ESI<sup>+</sup>), *m/z* 300.1227 ([*M*+*H*]<sup>+</sup>), calcd for C<sub>17</sub>H<sub>18</sub>NO<sub>4</sub><sup>+</sup>: 300.1230.

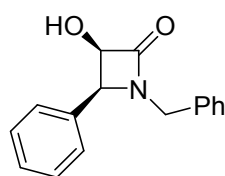

**(3*R*,4*S*)-1-benzyl-3-hydroxy-4-phenylazetidin-2-one (2j):** This is a known compound. <sup>[8]</sup> White solid, 18 mg, 70% yield, 88% ee,  $[\alpha]_D^{20} = +94.0$  (c 0.2, CHCl<sub>3</sub>);

The enantiomeric excess was determined by HPLC on Chiralpak OD-3 column, hexane: isopropanol = 90:10; flow rate = 1.0 mL/min; UV detection at 254 nm;  $t_R$  = 10.0 min (major), 12.9 min (minor).  $^1\text{H}$  NMR (600 MHz, Chloroform-*d*)  $\delta$  7.41 – 7.33 (m, 3H), 7.32 – 7.23 (m, 5H), 7.12 (dd,  $J$  = 7.5, 2.0 Hz, 2H), 5.03 (d,  $J$  = 4.9 Hz, 1H), 4.82 (d,  $J$  = 14.8 Hz, 1H), 4.63 (d,  $J$  = 4.8 Hz, 1H), 3.86 (d,  $J$  = 14.8 Hz, 1H).  $^{13}\text{C}$  NMR (151 MHz, Chloroform-*d*)  $\delta$  169.5, 134.8, 133.5, 128.9, 128.8, 128.6, 128.1, 127.9, 78.0, 62.0, 44.2. HRMS (ESI<sup>+</sup>),  $m/z$  254.1172 ([M+H]<sup>+</sup>), calcd for C<sub>16</sub>H<sub>16</sub>NO<sub>2</sub><sup>+</sup>: 254.1176.

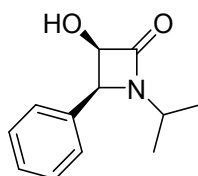

**(3R,4S)-3-hydroxy-1-isopropyl-4-phenylazetidin-2-one (2k):** This is a known compound. <sup>[1a]</sup> White solid, 16 mg, 77% yield, 91% ee,  $[\alpha]_D^{20} = +35.7$  (c 0.7, CHCl<sub>3</sub>); The enantiomeric excess was determined by HPLC on Chiralpak OD-3 column, hexane: isopropanol = 90:10; flow rate = 1.0 mL/min; UV detection at 254 nm;  $t_R$  = 7.9 min (major), 9.6 min (minor).  $^1\text{H}$  NMR (400 MHz, Chloroform-*d*)  $\delta$  7.50 – 7.32 (m, 5H), 4.97 (d,  $J$  = 5.0 Hz, 1H), 4.80 (d,  $J$  = 4.9 Hz, 1H), 3.96 (br, 1H), 3.85 – 3.45 (m, 1H), 1.27 (d,  $J$  = 6.8 Hz, 3H), 1.06 (d,  $J$  = 6.7 Hz, 3H).  $^{13}\text{C}$  NMR (101 MHz, Chloroform-*d*)  $\delta$  169.6, 135.2, 128.6, 128.5, 128.2, 76.6, 61.7, 45.0, 21.3, 20.2. HRMS (ESI<sup>+</sup>),  $m/z$  206.1174 ([M+H]<sup>+</sup>), calcd for C<sub>12</sub>H<sub>16</sub>NO<sub>2</sub><sup>+</sup>: 206.1176.

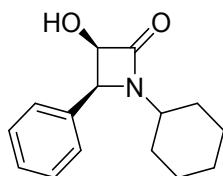

**(3R,4S)-1-cyclohexyl-3-hydroxy-4-phenylazetidin-2-one (2l):** This is a new compound. White solid, 18 mg, 72% yield, 94% ee,  $[\alpha]_D^{20} = +55.2$  (c 0.5, CHCl<sub>3</sub>); The enantiomeric excess was determined by HPLC on Chiralpak IA column, hexane: isopropanol = 95:5; flow rate = 1.0 mL/min; UV detection at 254 nm;  $t_R$  = 17.7 min

(major), 19.2 min (minor).  $^1\text{H}$  NMR (400 MHz, Chloroform-*d*)  $\delta$  7.58 – 7.31 (m, 5H), 4.96 (dd,  $J = 7.5, 4.9$  Hz, 1H), 4.81 (d,  $J = 4.9$  Hz, 1H), 3.92 – 3.77 (m, 1H), 3.52 – 3.33 (m, 1H), 2.09 – 1.86 (m, 1H), 1.88 – 1.68 (m, 2H), 1.68 – 1.48 (m, 3H), 1.35 – 1.21 (m, 1H), 1.21 – 1.11 (m, 2H), 1.11 – 0.98 (m, 1H).  $^{13}\text{C}$  NMR (101 MHz, Chloroform-*d*)  $\delta$  169.6, 135.3, 128.6, 128.6, 128.2, 76.6, 61.8, 52.6, 31.5, 30.5, 25.2, 24.9, 24.9. HRMS (ESI<sup>+</sup>),  $m/z$  246.1485 ([M+H]<sup>+</sup>), calcd for C<sub>15</sub>H<sub>20</sub>NO<sub>2</sub><sup>+</sup>: 246.1489.

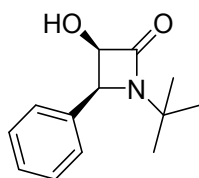

**(3R,4S)-1-(tert-butyl)-3-hydroxy-4-phenylazetidin-2-one (2m):** This is a new compound. White solid, 15 mg, 68% yield, 88% ee,  $[\alpha]_D^{20} = -7.6$  (c 0.7, CHCl<sub>3</sub>); The enantiomeric excess was determined by HPLC on Chiralpak OD-3 column, hexane: isopropanol = 90:10; flow rate = 1.0 mL/min; UV detection at 254 nm;  $t_R = 7.0$  min (major), 9.9 min (minor).  $^1\text{H}$  NMR (400 MHz, Chloroform-*d*)  $\delta$  7.46 – 7.33 (m, 5H), 4.90 (dd,  $J = 7.8, 5.1$  Hz, 1H), 4.86 (d,  $J = 5.1$  Hz, 1H), 2.81 (d,  $J = 7.9$  Hz, 1H), 1.29 (s, 9H).  $^{13}\text{C}$  NMR (101 MHz, Chloroform-*d*)  $\delta$  168.8, 136.0, 128.7, 128.6, 128.0, 75.9, 61.9, 54.4, 28.2. HRMS (ESI<sup>+</sup>),  $m/z$  220.1330 ([M+H]<sup>+</sup>), calcd for C<sub>13</sub>H<sub>18</sub>NO<sub>2</sub><sup>+</sup>: 220.1332.

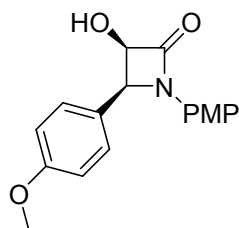

**(3R,4S)-3-hydroxy-1,4-bis(4-methoxyphenyl)azetidin-2-one (2n):** This is a known compound. <sup>[2]</sup> White solid, 27 mg, 91% yield, 92% ee,  $[\alpha]_D^{20} = +115.4$  (c 0.5, CHCl<sub>3</sub>); The enantiomeric excess was determined by HPLC on Chiralpak IA column, hexane: isopropanol = 85:15; flow rate = 1.0 mL/min; UV detection at 254 nm;  $t_R = 18.3$  min (major), 20.6 min (minor).  $^1\text{H}$  NMR (600 MHz, Chloroform-*d*)  $\delta$  7.31 – 7.21 (m, 5H),

6.94 (d,  $J = 8.3$  Hz, 2H), 6.80 (d,  $J = 8.7$  Hz, 2H), 5.22 (d,  $J = 5.2$  Hz, 1H), 5.14 (s, 1H), 3.80 (s, 3H), 3.75 (s, 3H), 2.59 (s, 1H).  $^{13}\text{C}$  NMR (151 MHz, Chloroform- $d$ )  $\delta$  165.6, 160.1, 156.4, 130.6, 128.8, 124.8, 118.9, 114.6, 114.4, 77.1, 61.9, 55.5, 55.3. HRMS (ESI $^+$ ),  $m/z$  300.1227 ([M+H] $^+$ ), calcd for  $\text{C}_{17}\text{H}_{18}\text{NO}_4^+$ : 300.1230.

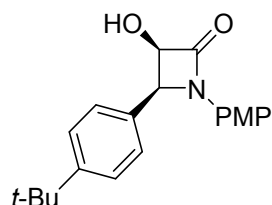

**(3R,4S)-4-(4-(tert-butyl) phenyl)-3-hydroxy-1-(4-methoxyphenyl) azetidin-2-one**

**(2o):** This is a known compound. <sup>[6]</sup> White solid, 28 mg, 88% yield, 87% ee,  $[\alpha]_{\text{D}}^{20} = +58.0$  (c 0.5,  $\text{CHCl}_3$ ); The enantiomeric excess was determined by HPLC on Chiralpak OD-3 column, hexane: isopropanol = 90:10; flow rate = 1.0 mL/min; UV detection at 254 nm;  $t_{\text{R}} = 9.6$  min (minor), 12.3 min (major).  $^1\text{H}$  NMR (400 MHz,  $\text{DMSO}-d_6$ )  $\delta$  7.37 (d,  $J = 8.4$  Hz, 2H), 7.25 – 7.18 (m, 4H), 6.88 (d,  $J = 9.0$  Hz, 2H), 6.06 (d,  $J = 7.0$  Hz, 1H), 5.26 (d,  $J = 5.1$  Hz, 1H), 5.14 (dd,  $J = 6.9, 5.1$  Hz, 1H), 3.68 (s, 3H), 1.26 (s, 9H).  $^{13}\text{C}$  NMR (101 MHz,  $\text{DMSO}-d_6$ )  $\delta$  166.8, 156.0, 150.5, 132.3, 131.2, 128.2, 125.4, 118.7, 114.9, 77.3, 62.0, 55.7, 34.7, 31.6. HRMS (ESI $^+$ ),  $m/z$  326.1748 ([M+H] $^+$ ), calcd for  $\text{C}_{20}\text{H}_{24}\text{NO}_3^+$ : 326.1751.

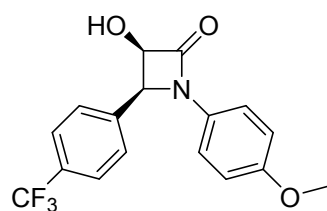

**(3R,4S)-3-hydroxy-1-(4-methoxyphenyl)-4-(4-(trifluoromethyl) phenyl) azetidin-**

**2-one (2p):** This is a new compound. White solid, 28 mg, 82% yield, 90% ee,  $[\alpha]_{\text{D}}^{20} = +112.0$  (c 0.5,  $\text{CHCl}_3$ ); The enantiomeric excess was determined by HPLC on Chiralpak OD-3 column, hexane: isopropanol = 90:10; flow rate = 1.0 mL/min; UV detection at 254 nm;  $t_{\text{R}} = 10.5$  min (minor), 14.0 min (major).  $^1\text{H}$  NMR (400 MHz,  $\text{DMSO}-d_6$ )  $\delta$  7.74 (d,  $J = 8.1$  Hz, 2H), 7.49 (d,  $J = 8.1$  Hz, 2H), 7.22 (d,  $J = 9.0$  Hz, 2H), 6.90 (d,  $J =$

9.0 Hz, 2H), 6.24 (d,  $J = 7.1$  Hz, 1H), 5.45 (d,  $J = 5.1$  Hz, 1H), 5.24 (dd,  $J = 7.1, 5.1$  Hz, 1H), 3.69 (s, 3H).  $^{13}\text{C}$  NMR (101 MHz,  $\text{DMSO-}d_6$ )  $\delta$  166.5, 156.2, 140.5, 131.0, 129.2, { 129.3, 128.9, 128.6, 128.3 (q,  $J = 31.8$  Hz)} {128.8, 126.1, 123.4, 120.7 (q,  $J = 273.2$  Hz)} {125.6, 125.6, 125.5, 125.5 (q,  $J = 4.0$  Hz)} 118.6, 115.0, 77.5, 61.7, 55.7. HRMS (ESI<sup>+</sup>),  $m/z$  338.0993 ([M+H]<sup>+</sup>), calcd for  $\text{C}_{17}\text{H}_{15}\text{F}_3\text{NO}_3^+$ : 338.0999.

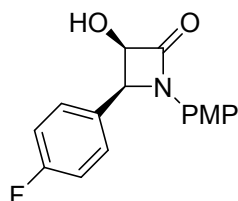

**(3R,4S)-4-(4-fluorophenyl)-3-hydroxy-1-(4-methoxyphenyl)azetidin-2-one (2q):**

This is a known compound. <sup>[7]</sup> White solid, 24 mg, 85% yield, 94% ee,  $[\alpha]_D^{20} = +102.2$  (c 0.5,  $\text{CHCl}_3$ ); The enantiomeric excess was determined by HPLC on Chiralpak IA column, hexane: isopropanol = 90:10; flow rate = 1.0 mL/min; UV detection at 254 nm;  $t_R = 18.8$  min (major), 20.8 min (minor).  $^1\text{H}$  NMR (400 MHz,  $\text{Chloroform-}d$ )  $\delta$  7.35 – 7.29 (m, 2H), 7.27 – 7.22 (m, 2H), 7.13 – 7.03 (m, 2H), 6.86 – 6.75 (m, 2H), 5.23 (d,  $J = 5.1$  Hz, 1H), 5.19 (d,  $J = 5.4$  Hz, 1H), 3.75 (s, 3H), 3.63 (d,  $J = 7.0$  Hz, 1H).  $^{13}\text{C}$  NMR (101 MHz,  $\text{Chloroform-}d$ )  $\delta$  166.2, 164.2, 161.7 (d,  $J = 249.5$  Hz), 156.6, 130.3, 129.5, 129.4 (d,  $J = 8.1$  Hz), 129.1, 129.1 (d,  $J = 3.0$  Hz), 118.9, 116.1, 115.9 (d,  $J = 22.2$  Hz), 114.5, 76.9, 61.9, 55.5. HRMS (ESI<sup>+</sup>),  $m/z$  288.1026 ([M+H]<sup>+</sup>), calcd for  $\text{C}_{16}\text{H}_{15}\text{FNO}_3^+$ : 288.1030.

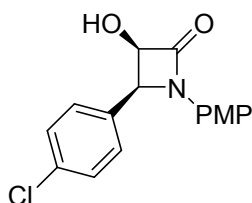

**(3R,4S)-4-(4-chlorophenyl)-3-hydroxy-1-(4-methoxyphenyl)azetidin-2-one (2r):**

This is a new compound. White solid, 24 mg, 81% yield, 94% ee,  $[\alpha]_D^{20} = +126.8$  (c 0.5,  $\text{CHCl}_3$ ); The enantiomeric excess was determined by HPLC on Chiralpak IA column, hexane: isopropanol = 90:10; flow rate = 1.0 mL/min; UV detection at 254 nm;  $t_R = 19.6$  min (major), 22.2 min (minor).  $^1\text{H}$  NMR (400 MHz,  $\text{Chloroform-}d$ )  $\delta$  7.36 (d,

$J = 8.5$  Hz, 2H), 7.30 – 7.20 (m, 4H), 6.86 – 6.75 (m, 2H), 5.20 (d,  $J = 6.9$  Hz, 2H), 3.75 (s, 3H), 3.71 (s, 1H).  $^{13}\text{C}$  NMR (101 MHz, Chloroform-*d*)  $\delta$  166.0, 156.6, 134.7, 131.9, 130.2, 129.2, 129.1, 118.9, 114.5, 61.9, 55.5. HRMS (ESI<sup>+</sup>),  $m/z$  304.0733 ([M+H]<sup>+</sup>), calcd for C<sub>16</sub>H<sub>15</sub>ClNO<sub>3</sub><sup>+</sup>: 304.0735.

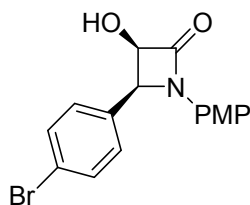

**(3*R*,4*S*)-4-(4-bromophenyl)-3-hydroxy-1-(4-methoxyphenyl)azetidin-2-one (2s):**

This is a new compound. White solid, 30 mg, 86% yield, 90% ee,  $[\alpha]_{\text{D}}^{20} = +112.4$  (c 0.5, CHCl<sub>3</sub>); The enantiomeric excess was determined by HPLC on Chiralpak OD-3 column, hexane: isopropanol = 90:10; flow rate = 1.0 mL/min; UV detection at 254 nm;  $t_{\text{R}} = 13.1$  min (minor), 15.7 min (major).  $^1\text{H}$  NMR (400 MHz, Chloroform-*d*)  $\delta$  7.57 – 7.43 (m, 2H), 7.30 – 7.17 (m, 4H), 6.86 – 6.75 (m, 2H), 5.19 (s, 2H), 3.75 (s, 3H), 3.64 (s, 1H).  $^{13}\text{C}$  NMR (101 MHz, Chloroform-*d*)  $\delta$  165.9, 156.6, 132.5, 132.1, 130.2, 129.4, 122.9, 118.9, 114.5, 62.0, 55.5. HRMS (ESI<sup>+</sup>),  $m/z$  348.0226 ([M+H]<sup>+</sup>), calcd for C<sub>16</sub>H<sub>15</sub>BrNO<sub>3</sub><sup>+</sup>: 348.0230.

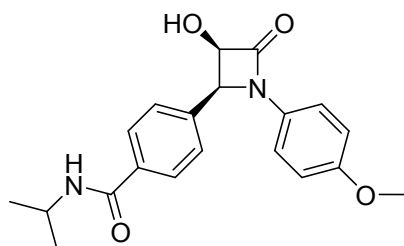

**4-((2*S*,3*R*)-3-hydroxy-1-(4-methoxyphenyl)-4-oxoazetidin-2-yl)-N-**

**isopropylbenzamide (2t):** This is a new compound. White solid, 15 mg, 45% yield, 78% ee,  $[\alpha]_{\text{D}}^{20} = +62.0$  (c 0.3, CHCl<sub>3</sub>); The enantiomeric excess was determined by HPLC on Chiralpak IA column, hexane: isopropanol = 85:15; flow rate = 1.0 mL/min; UV detection at 254 nm;  $t_{\text{R}} = 19.5$  min (minor), 23.6 min (major).  $^1\text{H}$  NMR (600 MHz, DMSO-*d*<sub>6</sub>)  $\delta$  8.2 (d,  $J = 7.7$  Hz, 1H), 7.8 (d,  $J = 8.1$  Hz, 2H), 7.3 (d,  $J = 8.1$  Hz, 2H), 7.2 (d,  $J = 8.9$  Hz, 2H), 6.9 (d,  $J = 8.9$  Hz, 2H), 6.2 (s, 1H), 5.4 (d,  $J = 5.0$  Hz, 1H), 5.2 (d,  $J = 5.0$  Hz, 1H), 4.1 (dq,  $J = 13.5, 6.6$  Hz, 1H), 3.7 (s, 3H), 1.1 (dd,  $J = 6.5, 2.7$  Hz,

7H).  $^{13}\text{C}$  NMR (151 MHz,  $\text{DMSO-}d_6$ )  $\delta$  166.7, 165.7, 156.1, 138.4, 135.0, 131.1, 128.2, 127.6, 118.7, 114.9, 77.5, 62.1, 55.7, 41.4, 22.8. HRMS (ESI<sup>+</sup>),  $m/z$  355.1648 ([M+H]<sup>+</sup>), calcd for  $\text{C}_{20}\text{H}_{23}\text{N}_2\text{O}_4^+$ : 355.1652.

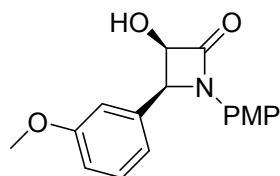

**(3R,4S)-3-hydroxy-4-(3-methoxyphenyl)-1-(4-methoxyphenyl)azetididin-2-one (2u):**

This is a new compound. White solid, 26 mg, 85% yield, 87% ee,  $[\alpha]_D^{20} = +96.8$  (c 0.5,  $\text{CHCl}_3$ ); The enantiomeric excess was determined by HPLC on Chiralpak IA column, hexane: isopropanol = 85:15; flow rate = 1.0 mL/min; UV detection at 254 nm;  $t_R$  = 14.5 min (major), 21.5 min (minor).  $^1\text{H}$  NMR (400 MHz,  $\text{Chloroform-}d$ )  $\delta$  7.39 – 7.20 (m, 3H), 6.97 – 6.81 (m, 3H), 6.83 – 6.72 (m, 2H), 5.25 – 5.10 (m, 2H), 3.75 (d,  $J$  = 10.3 Hz, 6H), 3.35 (d,  $J$  = 8.5 Hz, 1H).  $^{13}\text{C}$  NMR (101 MHz,  $\text{Chloroform-}d$ )  $\delta$  166.0, 160.1, 156.5, 135.0, 130.5, 130.2, 119.7, 118.9, 114.4, 114.2, 113.3, 77.1, 62.4, 55.5, 55.3. HRMS (ESI<sup>+</sup>),  $m/z$  300.1227 ([M+H]<sup>+</sup>), calcd for  $\text{C}_{17}\text{H}_{18}\text{NO}_4^+$ : 300.1230.

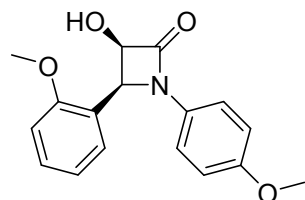

**(3R,4S)-3-hydroxy-4-(2-methoxyphenyl)-1-(4-methoxyphenyl)azetididin-2-one (2v):**

This is a new compound. White solid, 24 mg, 80% yield, 82% ee,  $[\alpha]_D^{20} = +44.8$  (c 0.5,  $\text{CHCl}_3$ ); The enantiomeric excess was determined by HPLC on Chiralpak IA column, hexane: isopropanol = 85:15; flow rate = 1.0 mL/min; UV detection at 254 nm;  $t_R$  = 12.5 min (major), 23.2min (minor).  $^1\text{H}$  NMR (400 MHz,  $\text{Chloroform-}d$ )  $\delta$  7.36 – 7.26 (m, 3H), 7.18 (dd,  $J$  = 7.5, 1.7 Hz, 1H), 7.00 – 6.90 (m, , 2H), 6.84 – 6.75 (m, 2H), 5.49 (d,  $J$  = 5.2 Hz, 1H), 5.18 (dd,  $J$  = 9.4, 5.2 Hz, 1H), 3.87 (s, 3H), 3.74 (s, 3H), 3.08 (d,  $J$  = 9.4 Hz, 1H).  $^{13}\text{C}$  NMR (101 MHz,  $\text{Chloroform-}d$ )  $\delta$  166.1, 157.7, 156.3, 130.9, 129.9, 128.8, 121.6, 121.1, 118.7, 114.4, 111.3, 77.4, 59.2, 55.9, 55.5. HRMS (ESI<sup>+</sup>),  $m/z$  300.1227 ([M+H]<sup>+</sup>), calcd for  $\text{C}_{17}\text{H}_{18}\text{NO}_4^+$ : 300.1230.

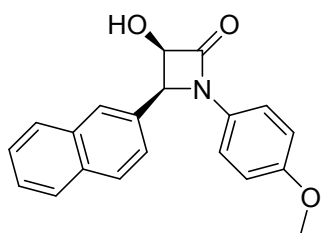

**(3*R*,4*S*)-3-hydroxy-1-(4-methoxyphenyl)-4-(naphthalen-2-yl)azetidin-2-one (2w):**

This is a new compound. White solid, 28 mg, 92% yield, 88% ee,  $[\alpha]_D^{20} = +110.0$  (c 0.5, CHCl<sub>3</sub>); The enantiomeric excess was determined by HPLC on Chiralpak IA column, hexane: isopropanol = 85:15; flow rate = 1.0 mL/min; UV detection at 254 nm;  $t_R = 16.5$  min (major), 24.1 min (minor). <sup>1</sup>H NMR (400 MHz, DMSO-*d*<sub>6</sub>) δ 7.94 – 7.80 (m, 4H), 7.51 (dt, *J* = 6.3, 3.4 Hz, 2H), 7.41 (dd, *J* = 8.6, 1.8 Hz, 1H), 7.30 – 7.19 (m, 2H), 6.92 – 6.82 (m, 2H), 6.15 (d, *J* = 7.1 Hz, 1H), 5.47 (d, *J* = 5.1 Hz, 1H), 5.24 (dd, *J* = 7.1, 5.1 Hz, 1H), 3.66 (s, 3H). <sup>13</sup>C NMR (101 MHz, DMSO-*d*<sub>6</sub>) δ 166.8, 156.1, 133.3, 133.2, 131.3, 128.2, 128.1, 128.0, 127.5, 126.7, 126.5, 126.2, 118.7, 114.9, 77.6, 62.5, 55.7. HRMS (ESI<sup>+</sup>), *m/z* 338.0993 ([*M*+*H*]<sup>+</sup>), calcd for C<sub>20</sub>H<sub>18</sub>NO<sub>3</sub><sup>+</sup>: 320.1281.

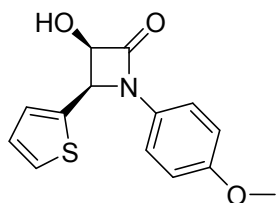

**(3*R*,4*R*)-3-hydroxy-1-(4-methoxyphenyl)-4-(thiophen-2-yl) azetidin-2-one (2x):**

This is a known compound. <sup>[3]</sup> White solid, 24 mg, 88% yield, 87% ee,  $[\alpha]_D^{20} = +60.4$  (c 0.5, CHCl<sub>3</sub>); The enantiomeric excess was determined by HPLC on Chiralpak OD-3 column, hexane: isopropanol = 90:10; flow rate = 1.0 mL/min; UV detection at 254 nm;  $t_R = 19.2$  min (minor), 20.5 min (major). <sup>1</sup>H NMR (400 MHz, DMSO-*d*<sub>6</sub>) δ 7.51 (dd, *J* = 5.0, 1.3 Hz, 1H), 7.30 – 7.23 (m, 2H), 7.18 (dd, *J* = 3.6, 1.3 Hz, 1H), 7.03 (dd, *J* = 5.1, 3.5 Hz, 1H), 6.94 – 6.83 (m, 2H), 6.33 (s, 1H), 5.62 (d, *J* = 4.9 Hz, 1H), 5.18 (d, *J* = 4.5 Hz, 1H), 3.69 (s, 3H). <sup>13</sup>C NMR (101 MHz, DMSO-*d*<sub>6</sub>) δ 166.5, 156.2, 138.7, 131.0, 130.1, 128.2, 127.2, 118.8, 114.9, 77.3, 58.7, 55.7. HRMS (ESI<sup>+</sup>), *m/z* 276.0685 ([*M*+*H*]<sup>+</sup>), calcd for C<sub>14</sub>H<sub>14</sub>NO<sub>3</sub>S<sup>+</sup>: 276.0689.



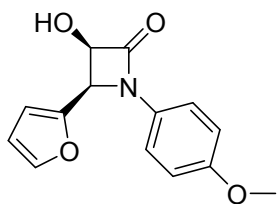

**(3*R*,4*R*)-4-(furan-2-yl)-3-hydroxy-1-(4-methoxyphenyl)azetidin-2-one (2y):** This is a known compound.<sup>[12]</sup> White solid, 22 mg, 85% yield, 82% ee,  $[\alpha]_D^{20} = +115.5$  (c 0.8, CHCl<sub>3</sub>); The enantiomeric excess was determined by HPLC on Chiralpak IA column, hexane: isopropanol = 85:15; flow rate = 1.0 mL/min; UV detection at 254 nm;  $t_R = 11.9$  min (major), 18.9 min (minor). <sup>1</sup>H NMR (400 MHz, DMSO-*d*<sub>6</sub>)  $\delta$  7.7 (dd,  $J = 1.7, 0.7$  Hz, 1H), 7.3 – 7.2 (m, 2H), 6.9 – 6.9 (m, 2H), 6.5 – 6.4 (m, 2H), 6.3 (d,  $J = 7.3$  Hz, 1H), 5.4 (d,  $J = 5.0$  Hz, 1H), 5.2 (dd,  $J = 7.3, 5.0$  Hz, 1H), 3.7 (s, 3H). <sup>13</sup>C NMR (101 MHz, DMSO-*d*<sub>6</sub>)  $\delta$  166.6, 156.1, 149.3, 143.9, 131.3, 118.4, 114.9, 111.1, 110.6, 77.3, 56.5, 55.7.

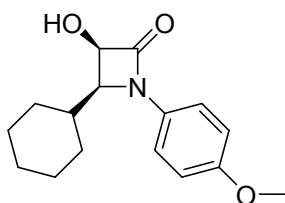

**(3*R*,4*S*)-4-cyclohexyl-3-hydroxy-1-(4-methoxyphenyl)azetidin-2-one (2z):** This is a new compound. White solid, 25 mg, 91% yield, 90% ee,  $[\alpha]_D^{20} = +28.2$  (c 0.5, CHCl<sub>3</sub>); The enantiomeric excess was determined by HPLC on Chiralpak OD-3 column, hexane: isopropanol = 90:10; flow rate = 1.0 mL/min; UV detection at 254 nm;  $t_R = 6.6$  min (minor), 8.5 min (major). <sup>1</sup>H NMR (400 MHz, Chloroform-*d*)  $\delta$  7.42 – 7.28 (m, 2H), 6.92 – 6.80 (m, 2H), 5.07 (t,  $J = 5.1$  Hz, 1H), 4.73 (d,  $J = 6.1$  Hz, 1H), 4.05 (dd,  $J = 7.3, 5.2$  Hz, 1H), 3.79 (s, 3H), 1.90 – 1.81 (m, 1H), 1.76 – 1.59 (m, 4H), 1.35 – 1.07 (m, 6H). <sup>13</sup>C NMR (101 MHz, Chloroform-*d*)  $\delta$  168.5, 156.6, 131.2, 119.9, 114.2, 75.0, 63.4, 55.5, 38.5, 30.2, 29.6, 26.3, 26.2, 26.0. HRMS (ESI<sup>+</sup>),  $m/z$  276.1591 ([M+H]<sup>+</sup>), calcd for C<sub>16</sub>H<sub>22</sub>NO<sub>3</sub><sup>+</sup>: 276.1594.

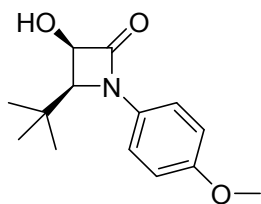

**(3*R*,4*S*)-4-(tert-butyl)-3-hydroxy-1-(4-methoxyphenyl)azetidin-2-one (2aa):** This is a known compound.<sup>[13]</sup> White solid, 17.5 mg, 70% yield, 85% ee,  $[\alpha]_D^{20} = +20.0$  (c 0.3, CHCl<sub>3</sub>); The enantiomeric excess was determined by HPLC on Chiralpak OD-3 column, hexane: isopropanol = 90:10; flow rate = 1.0 mL/min; UV detection at 254 nm;  $t_R = 7.9$  min (minor), 10.9 min (major). <sup>1</sup>H NMR (400 MHz, Chloroform-*d*)  $\delta$  7.3 – 7.3 (m, 2H), 6.9 – 6.8 (m, 2H), 5.1 (t,  $J = 5.7$  Hz, 1H), 4.4 (d,  $J = 6.0$  Hz, 1H), 4.1 (d,  $J = 5.3$  Hz, 1H), 3.8 (s, 3H), 1.1 (s, 9H). <sup>13</sup>C NMR (101 MHz, Chloroform-*d*)  $\delta$  169.1, 157.0, 130.3, 122.0, 114.2, 75.6, 67.9, 55.5, 34.9, 27.2.

## 5. Deuterium-labelling Experiments.

**Deuterium-labelling experiments in the presence of phenylphosphinic acid (A4):** **1a** (0.05 mmol, 1.0 equiv), **A4** (phenylphosphinic acid, 0.05 mmol, 1.0 equiv), CD<sub>3</sub>COOD (50 μL, 0.87 mmol, 17.5 equiv) and *d*<sup>8</sup>-toluene (0.5 mL) were added into 5 NMR tubes, and the mixture was stirred at 80 °C for 0 h, 1 h, 5 h, 17 h and 24 h respectively. The deuteration ratios were determined by <sup>1</sup>H-NMR spectroscopy (Figure S1).

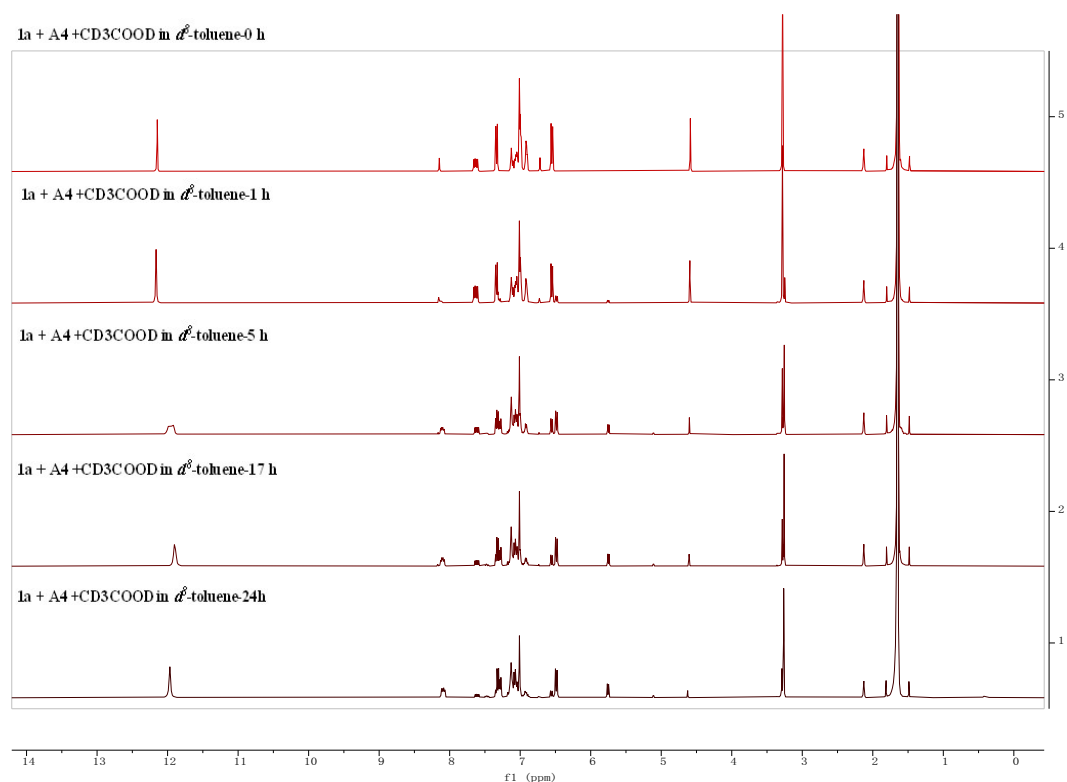

**Figure S1.** <sup>1</sup>H-NMR spectra of the deuteration experiments in the presence of phenylphosphinic acid (**A4**)

**Deuterium-labelling experiments in the absence of phenylphosphinic acid (A4):**  
**1a** (0.05 mmol, 1.0 equiv), CD<sub>3</sub>COOD (50 μL, 0.87 mmol, 17.5 equiv) and *d*<sup>8</sup>-toluene (0.5 mL) were added into **NMR tube 1**, and the mixture was stirred at 80 °C for 24 h.  
**1a** (0.05 mmol, 1.0 equiv) and *d*<sup>8</sup>-toluene (0.5 mL) were added into **NMR tube 1**.  
The deuteration ratio was determined by <sup>1</sup>H-NMR spectroscopy (Figure S2).  
The <sup>1</sup>H-NMR spectroscopy showed both integral ratio of the **H** and O-**CH**<sub>3</sub> in was 1:3.

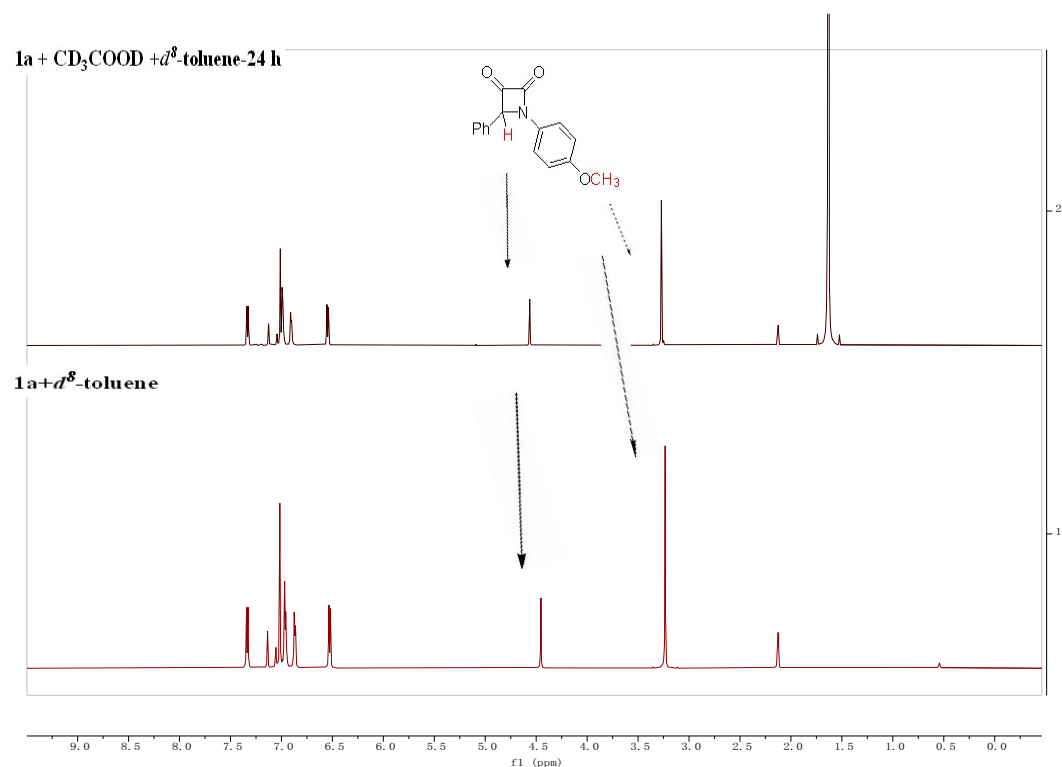

**Figure S2.** <sup>1</sup>H-NMR spectra of the deuteration experiment in the absence of phenylphosphinic acid (**A4**).

## 6. Rationale for the Origin of Diastereoselectivity and Enantioselectivity.

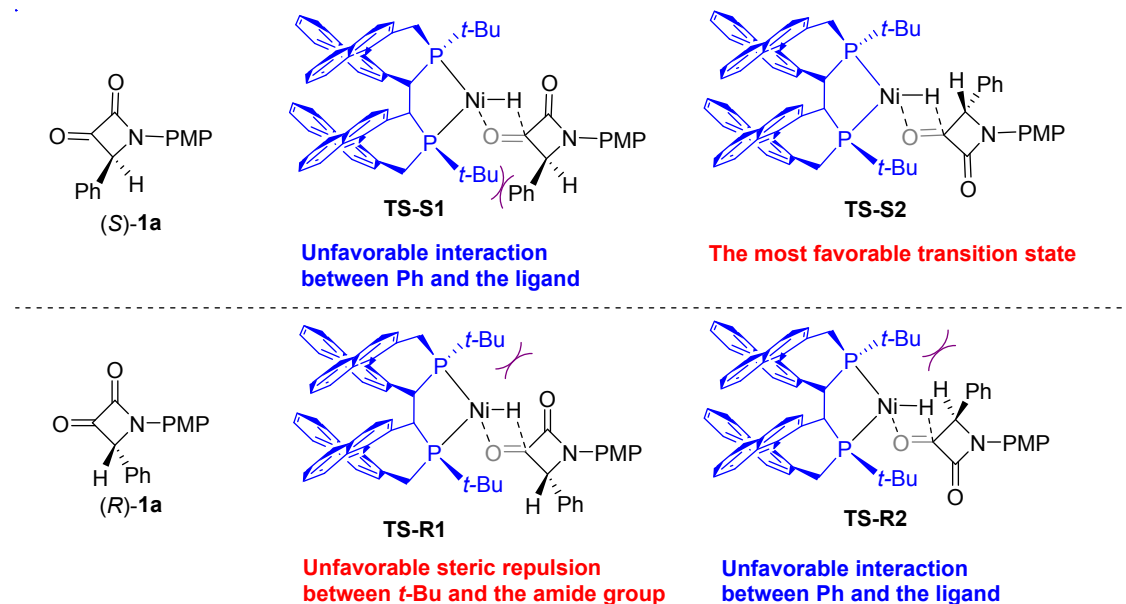

**Figure S3.** Rationale for the origin of diastereoselectivity and enantioselectivity.

According to the previous mechanistic investigations on nickel-catalyzed asymmetric hydrogenation of our group and Wanbin Zhang's group (see: (a) Y. Liu, Z. Yi, X. Yang, H. Wang, C. Yin, M. Wang, X.-Q. Dong, X. Zhang, *ACS Catal.* **2020**, *10*, 11153-11161; (b) Y. Hu, J. Chen, B. Li, Z. Zhang, I. D. Gridnev, W. Zhang, *Angew. Chem., Int. Ed.* **2020**, *59*, 5371-5375. (c) B. Li, J. Chen, Z. Zhang, I. D. Gridnev, W. Zhang, *Angew. Chem., Int. Ed.* **2019**, *58*, 7329-7334.), nickel hydride was identified as the key catalytic species in the current reaction.

As can be seen from Figure S3 above, the origin of diastereoselectivity was the energy difference between **TS-S1** and **TS-S2**, and **TS-R1** and **TS-R2**, the nickel hydride species attacks the carbonyl group from the opposite side of the  $\alpha$ -phenyl group due to the steric repulsion between the phenyl group and the ligand. The origin of enantioselectivity (rate difference observed in the reduction of the *(S)*- vs. the *(R)*- enantiomer of **1a**) was caused by the unfavorable steric interactions between the *t*-Bu group and the amide group of **(R)-1a** in **TS-R1**, and **TS-S2** is the most favorable transition state (**(S)-1a** matches better with the catalyst than **(R)-1a**).

## 7. Synthetic Applications.

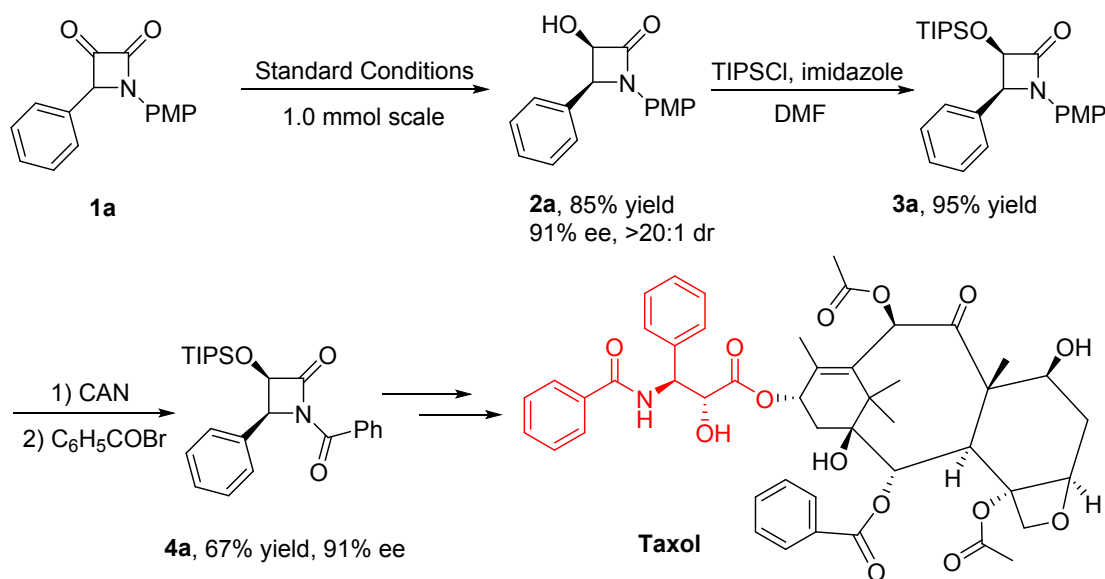

**Compound 2a:** A stock solution was made by mixing Ni(OAc)<sub>2</sub> (9.0 mg, 0.05 mmol) with (*S*)-Binapine (40 mg, 0.055 mmol) in a 1:1.1 molar ratio in DCM (1.0 mL) at room temperature for 30 min in an argon-filled glovebox. The catalyst solution (1.0 mL, 0.005 mmol) was transferred by syringe into the vials charged with substrate **1a** (267 mg, 1.0 mmol) in anhydrous toluene (9.0 mL). The vials were subsequently transferred into an autoclave into which hydrogen gas was charged. The reaction was then stirred under H<sub>2</sub> (50 atm) at 80 °C for 36 h. The hydrogen gas was released slowly and carefully. The reaction solution was concentrated and the residue was purified by column chromatography on silica gel (eluent: PE: EA = 5:1 to 2:1). The ee value of compound **2a** was determined by HPLC analysis on a chiral stationary phase. Pure compound **2a** (215 mg, 85% yield, 91% ee) was afforded after column chromatography.

**Compound 3a** <sup>[10]</sup>: To a solution of **2a** (0.85 mmol, 215 mg, 1.0 equiv.) in anhydrous DMF (1.0 mL) was cooled to 0 °C, imidazole was added (cat. 0.01 equiv.) into the mixture and TIPSCl (1.5 mmol, 340 μL, 1.5 equiv.) was added slowly by syringe. TLC indicated that **2a** was consumed completely. The mixture was cooled to room temperature and quenched by 1 mL H<sub>2</sub>O, the mixture was extracted by DCM (20 mL for 2 times), and the combined organic layer was washed by NaHCO<sub>3</sub>, brine

successively. The obtained organic layer was dried over anhydrous Na<sub>2</sub>SO<sub>4</sub>, filtered and concentrated under vacuum. The residue was purified by chromatography (Si<sub>2</sub>O, PE/EA from 20:1 to 5:1). Compound **3a** was obtained as a light yellow solid (340 mg, 95% yield).

**Compound 4a** <sup>[10]</sup>: (step 1) To a solution of **3a** (0.81 mmol, 340 mg, 1.0 equiv.) in CH<sub>3</sub>CN (5 mL) was cooled to -5 °C, CAN (2.67 mmol, 1.01g, 3.3 equiv.) in 3 mL water was added dropwise. The reaction mixture was stirred for 45 min until TLC indicated the consumption of the starting material. Then the mixture was diluted with EtOAc (10 mL) and washed with saturated aqueous NaHCO<sub>3</sub> (2×10 mL), water (2×5 mL), saturated sodium metabisulfite (2×5 mL) and brine, and then the organic layer was dried over anhydrous Na<sub>2</sub>SO<sub>4</sub>. The crude product was chromatographed on silica gel with 40% EtOAc in hexanes to give the deprotected lactam. (step 2) To a solution of the deprotected lactam in anhydrous CH<sub>2</sub>Cl<sub>2</sub> (1.0 mL) was cooled to 0 °C, triethylamine (285 μL, 1.62 mmol, 2 equiv.) and benzoyl chloride (137 μL, 0.89 mmol, 1.1 equiv.) were added. The mixture was then stirred at room temperature for 3 hours, diluted with EtOAc (10 mL), washed with saturated aqueous NaHCO<sub>3</sub> and brine, and dried over anhydrous Na<sub>2</sub>SO<sub>4</sub>. The crude product was purified by chromatography (15% EtOAc in hexane) to give the β-lactam **4a** (225 mg, 67% yield, 91% ee). <sup>1</sup>H NMR (400 MHz, Chloroform-*d*) δ 8.09 – 7.98 (m, 2H), 7.63 – 7.54 (m, 1H), 7.51 – 7.44 (m, 2H), 7.43 – 7.28 (m, 5H), 5.43 (d, *J* = 6.1 Hz, 1H), 5.25 (d, *J* = 6.1 Hz, 1H), 1.04 – 0.94 (m, 3H), 0.94 – 0.83 (m, 18H). <sup>13</sup>C NMR (101 MHz, Chloroform-*d*) δ 166.3, 165.5, 133.8, 133.4, 132.1, 129.9, 128.4, 128.2, 128.2, 76.6, 61.2, 17.5, 17.4, 11.7.

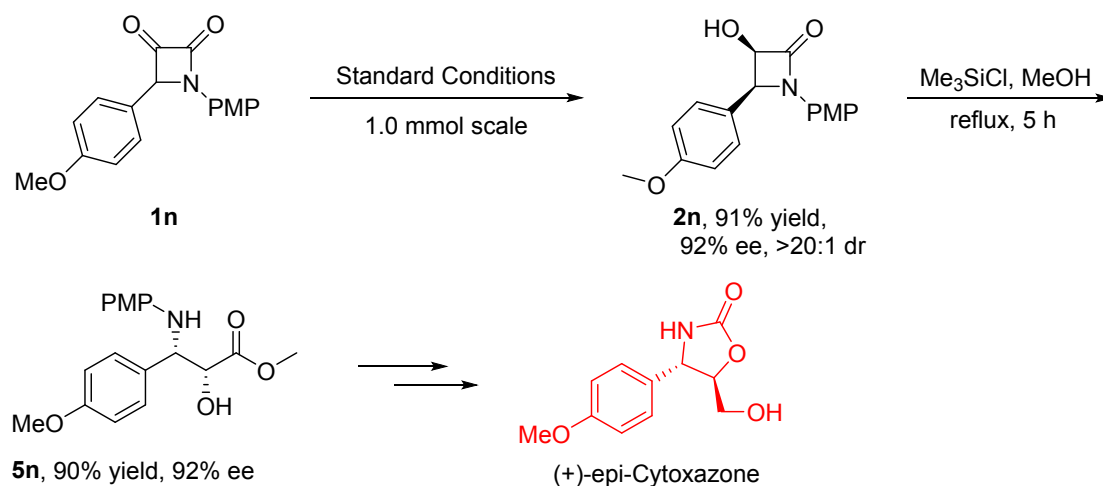

**Compound 2n:** A stock solution was made by mixing  $\text{Ni}(\text{OAc})_2$  (9.0 mg, 0.05 mmol) with (*S*)-Binapine (40 mg, 0.055 mmol) in a 1:1.1 molar ratio in DCM (1.0 mL) at room temperature for 30 min in an argon-filled glovebox. The catalyst solution (1.0 mL, 0.005 mmol) was transferred by syringe into the vial charged with substrate **1n** (297 mg, 1.0 mmol) in anhydrous toluene (9.0 mL). The vial was subsequently transferred into an autoclave into which hydrogen gas was charged. The reaction was then stirred under  $\text{H}_2$  (50 atm) at 80 °C for 36 h. The hydrogen gas was released slowly and carefully. The reaction solution was concentrated and the residue was purified by column chromatography on silica gel (eluent: EA: PE = 5:1 to 2:1). The ee value of compound **2n** was determined by HPLC analysis on a chiral stationary phase. Pure compound **2n** (269 mg, 91% yield, 92% ee) was afforded after column chromatography.

**Compound 5n** <sup>[9]</sup>: To a solution of **2n** (0.9 mmol, 269 mg, 1.0 equiv.) in anhydrous MeOH (2.0 mL) was cooled to 0°C,  $\text{Me}_3\text{SiCl}$  (2.7 mmol, 340  $\mu\text{L}$ , 3.0 equiv.) was added slowly by syringe. TLC indicated that some **2n** was remained and  $\text{Me}_3\text{SiCl}$  (1.8 mmol, 227  $\mu\text{L}$ , 2.0 equiv.) was added into the mixture. The mixture was warmed to room temperature and refluxed for 5 hours. After the starting materials was consumed completely the mixture was cooled to room temperature and quenched by 1 mL  $\text{H}_2\text{O}$ , the mixture was extracted by EtOAc (10 mL for 2 times), and the combined organic layer was washed by  $\text{NaHCO}_3$ , brine successively. The obtained organic layer was dried over anhydrous  $\text{Na}_2\text{SO}_4$ , filtered and concentrated under vacuum. The residue was purified by chromatography ( $\text{Si}_2\text{O}$ , PE/EA from 20:1 to 6:1). Compound **5n** was



obtained as a light yellow solid (265 mg, 90% yield, 92% ee).  $^1\text{H}$  NMR (600 MHz, Chloroform-*d*)  $\delta$  7.33 – 7.22 (m, 2H), 6.90 – 6.82 (m, 2H), 6.73 – 6.65 (m, 2H), 6.56 – 6.46 (m, 2H), 4.79 (d,  $J = 2.9$  Hz, 1H), 4.47 (s, 1H), 4.43 (d,  $J = 2.8$  Hz, 1H), 3.75 (d,  $J = 2.9$  Hz, 6H), 3.67 (s, 3H), 3.21 (s, 1H).  $^{13}\text{C}$  NMR (151 MHz, Chloroform-*d*)  $\delta$  173.5, 159.0, 152.3, 140.5, 131.4, 128.1, 115.4, 114.7, 114.1, 74.8, 59.5, 55.7, 55.2, 52.9.

## 8. NMR Spectroscopic Data.

### $^1\text{H}$ NMR and $^{13}\text{C}$ NMR of 1a

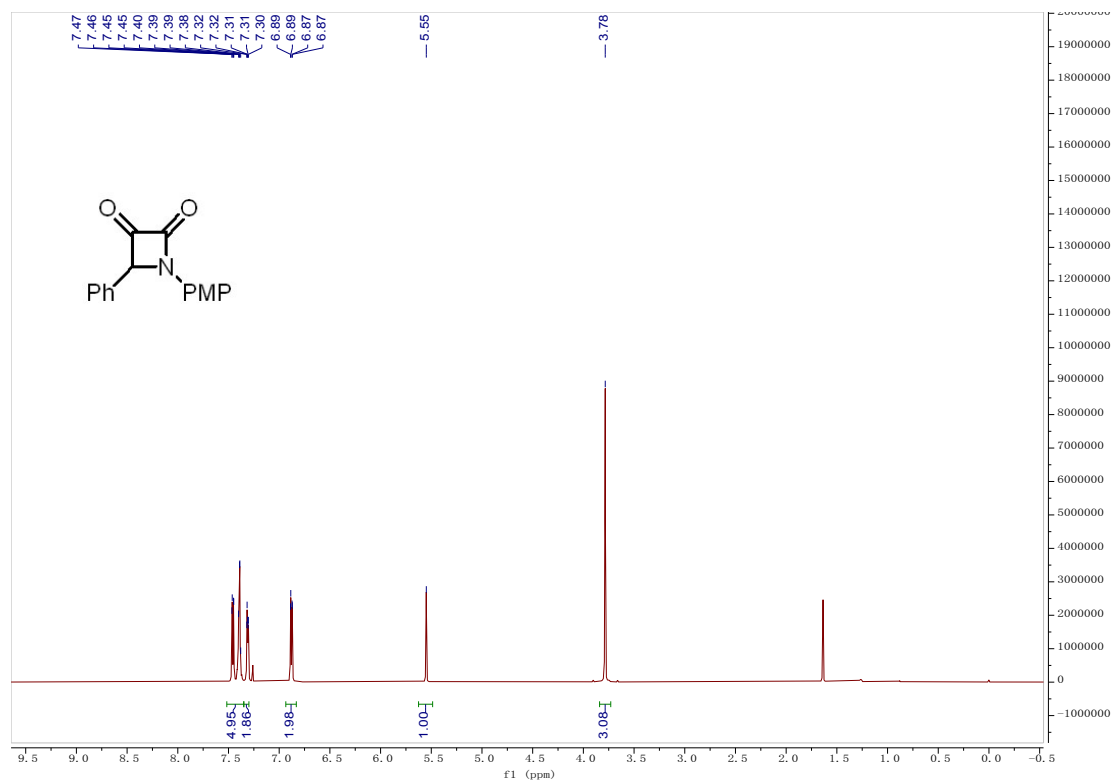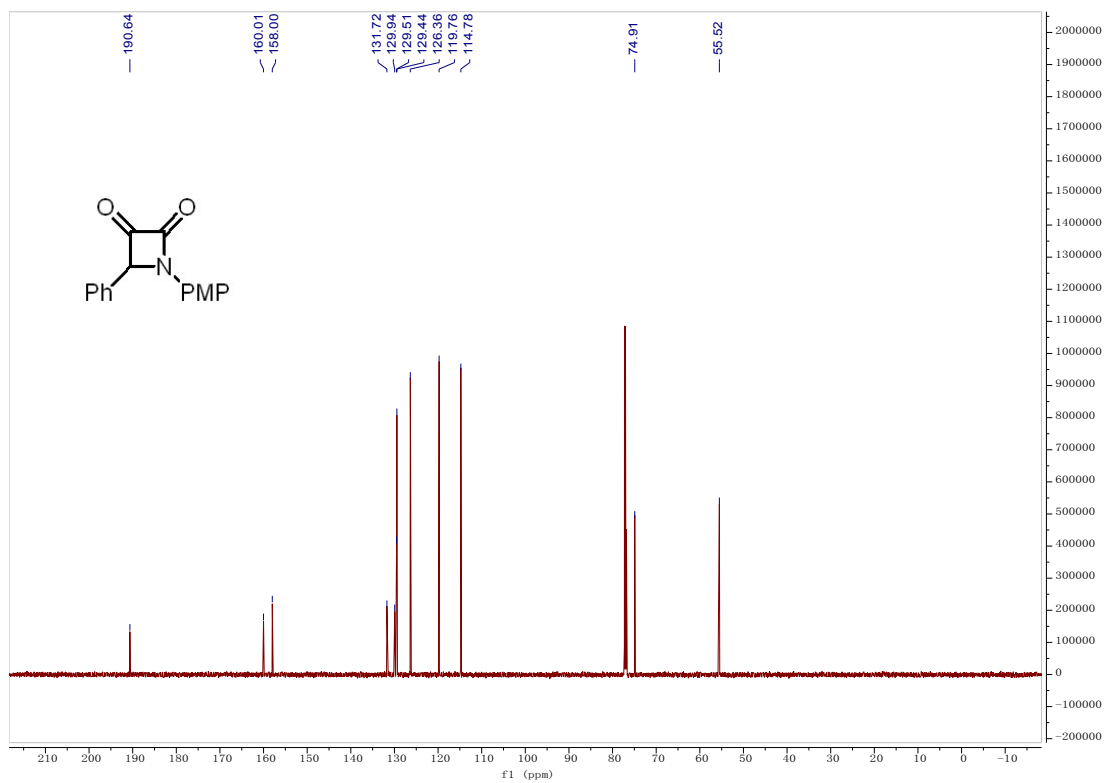

# $^1\text{H}$ NMR and $^{13}\text{C}$ NMR of 1b

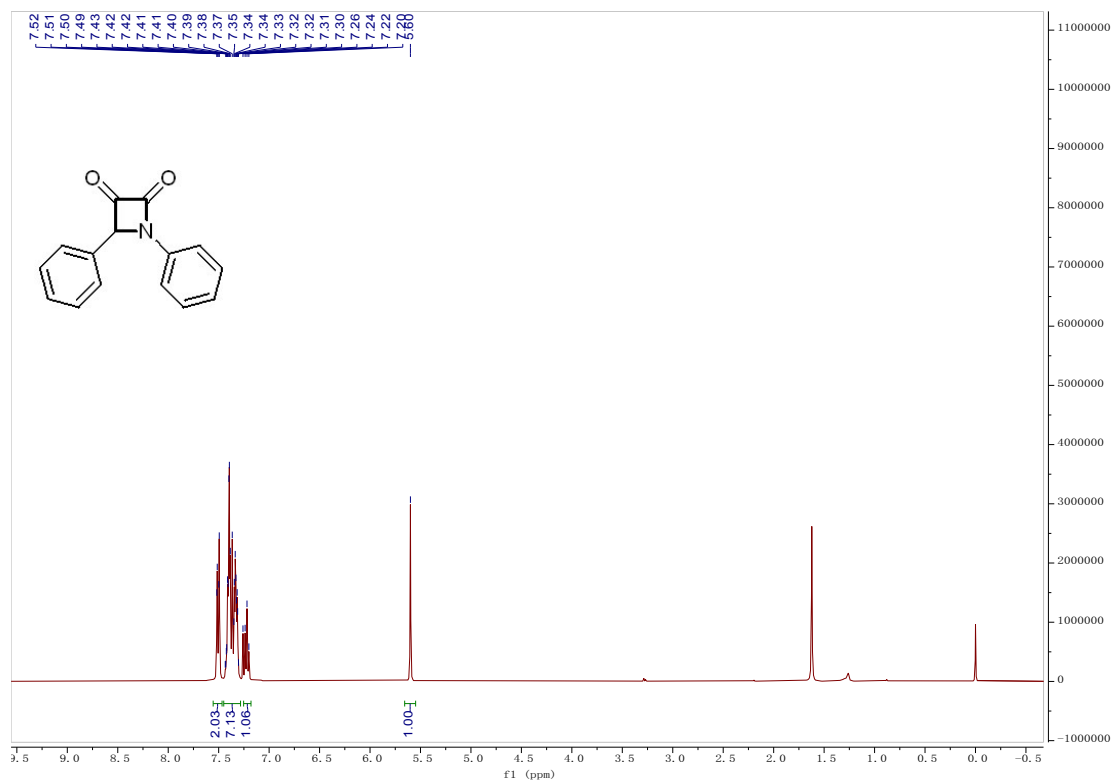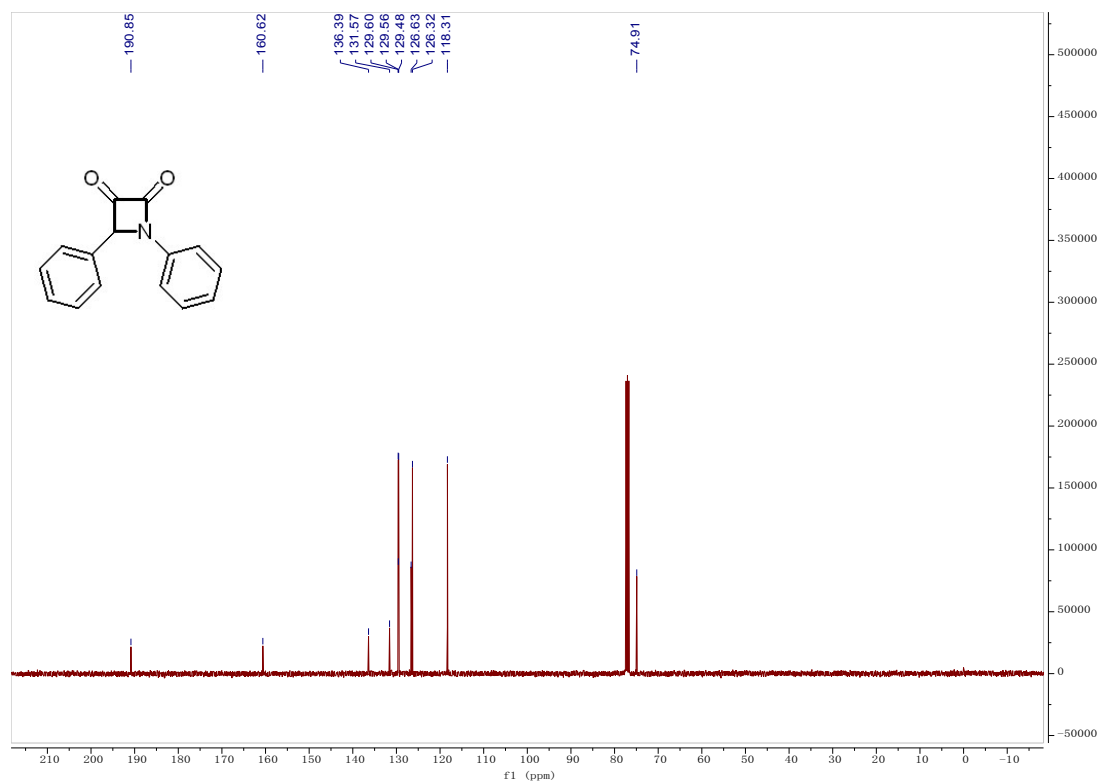

# <sup>1</sup>H NMR and <sup>13</sup>C NMR of 1c

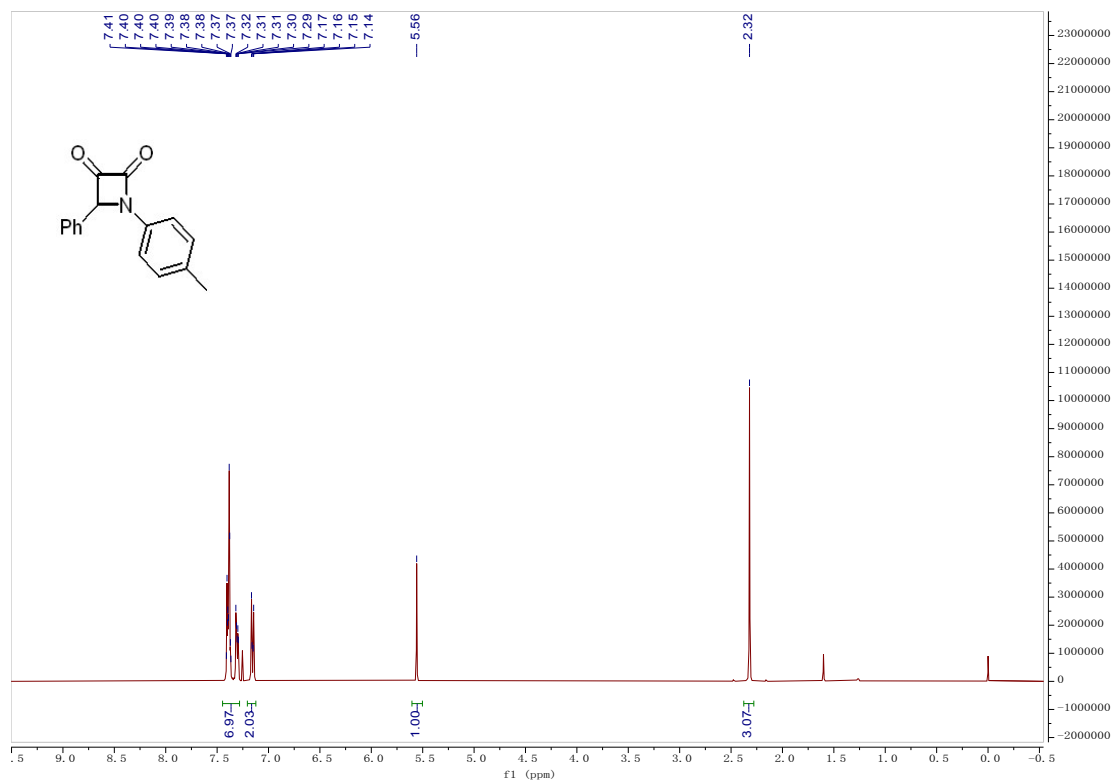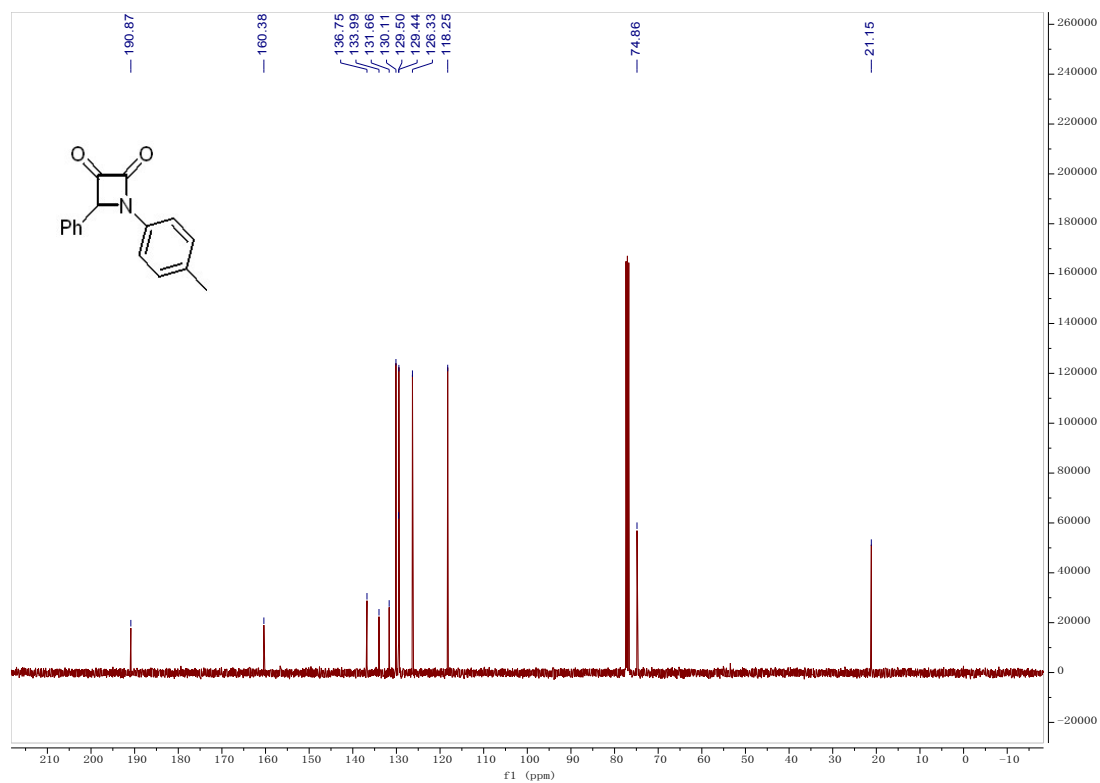

# <sup>1</sup>H NMR and <sup>13</sup>C NMR of 1d

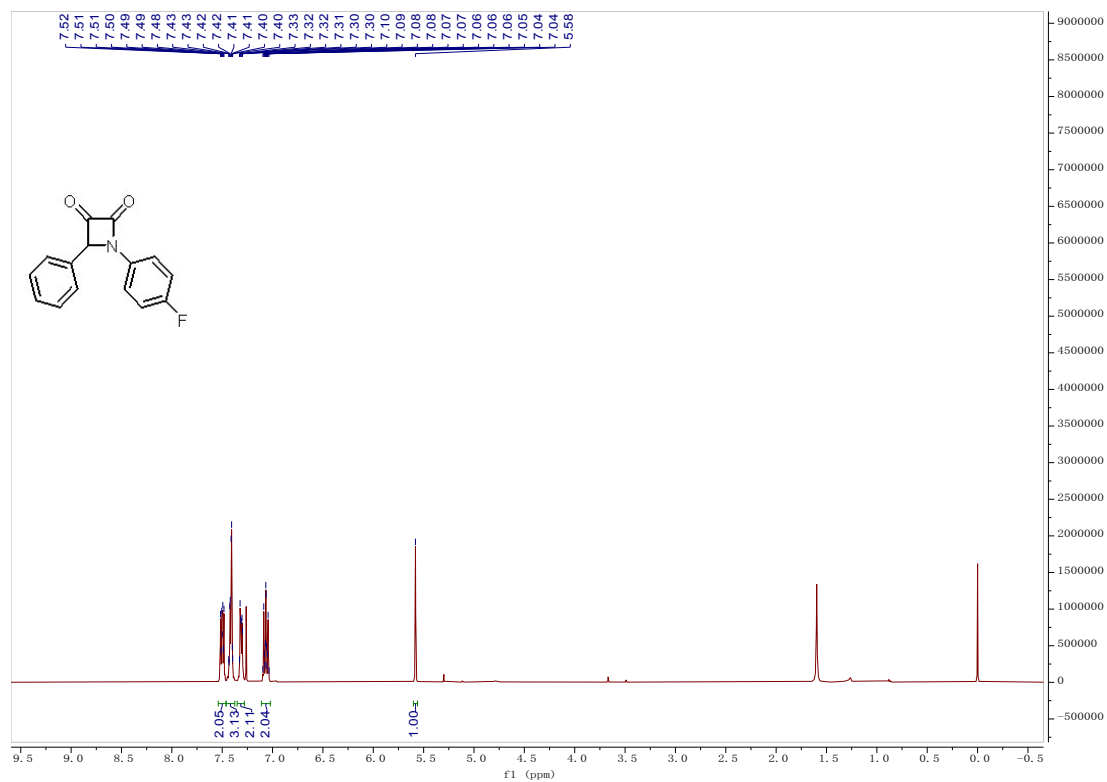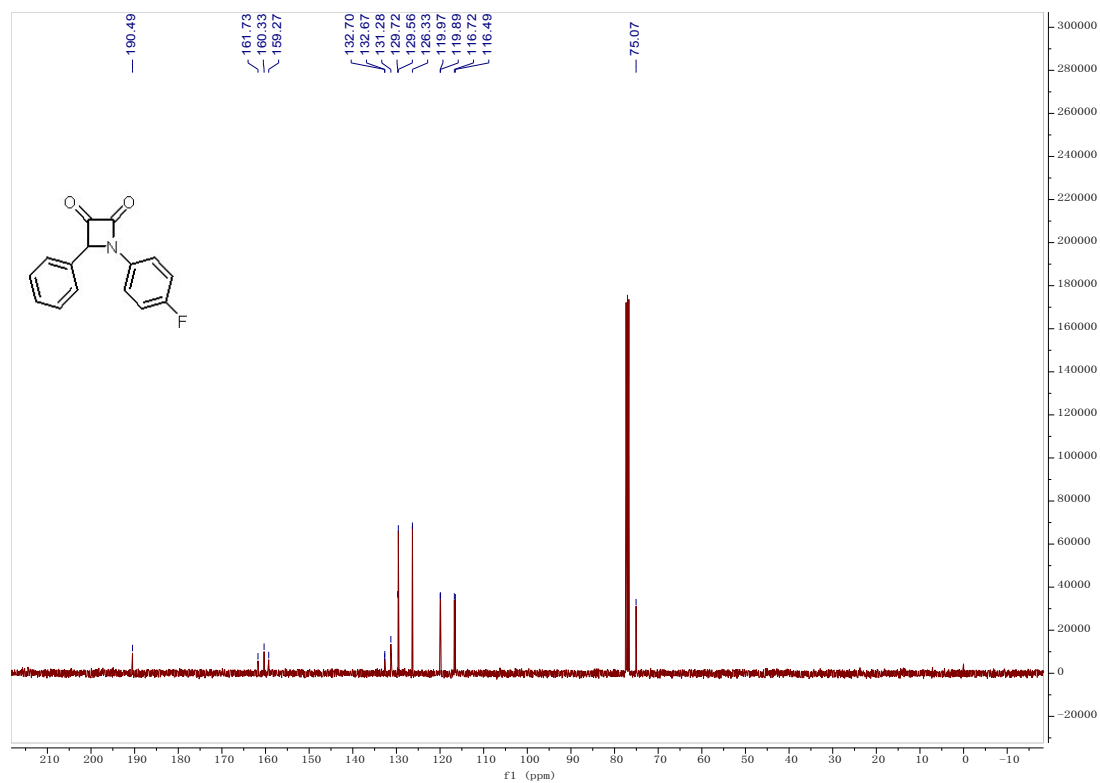

# $^1\text{H}$ NMR and $^{13}\text{C}$ NMR of 1e

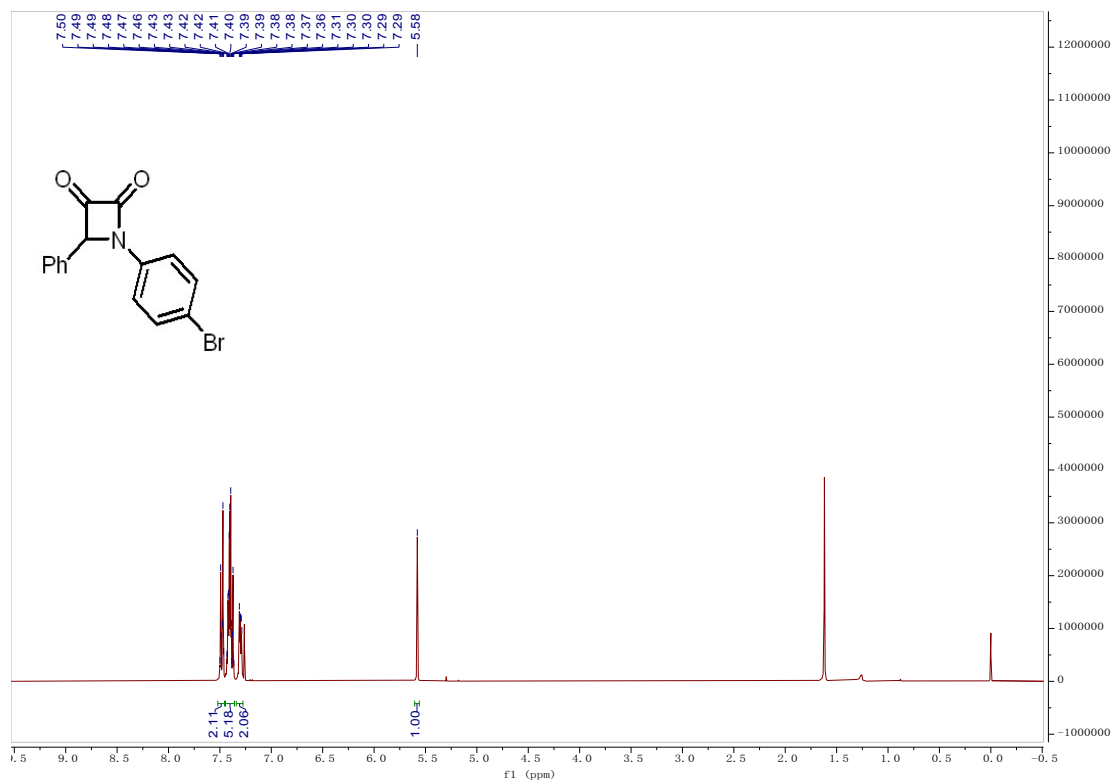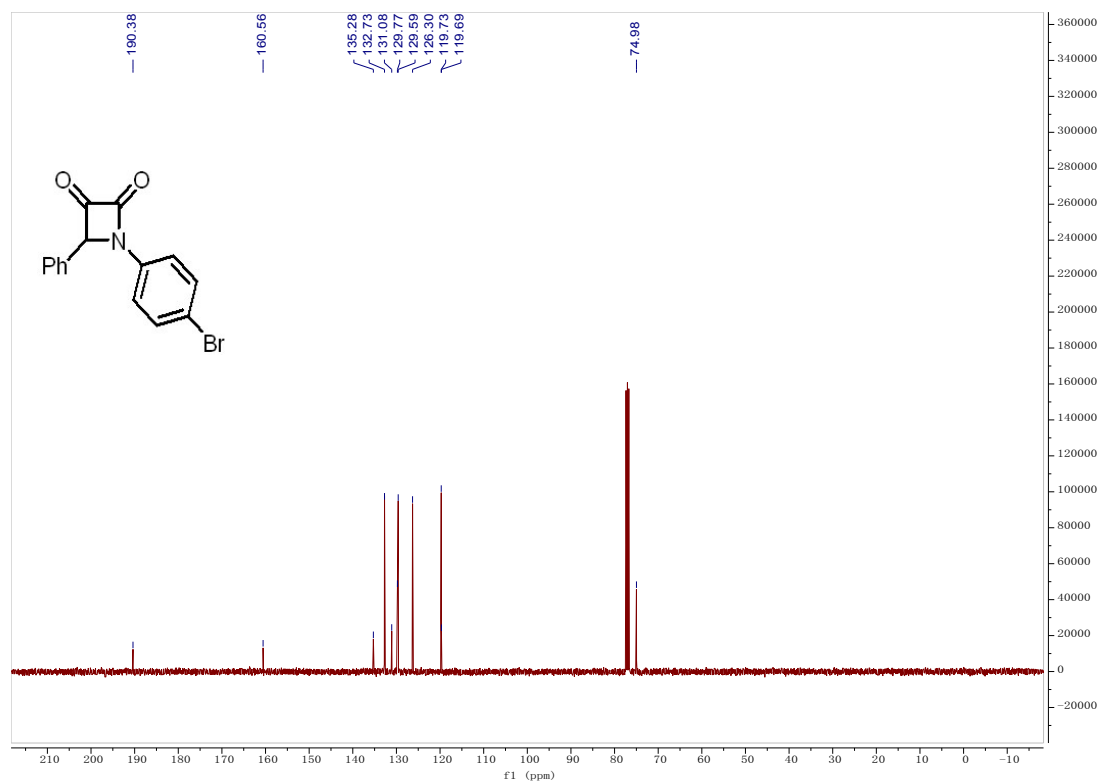

# <sup>1</sup>H NMR and <sup>13</sup>C NMR of 1f

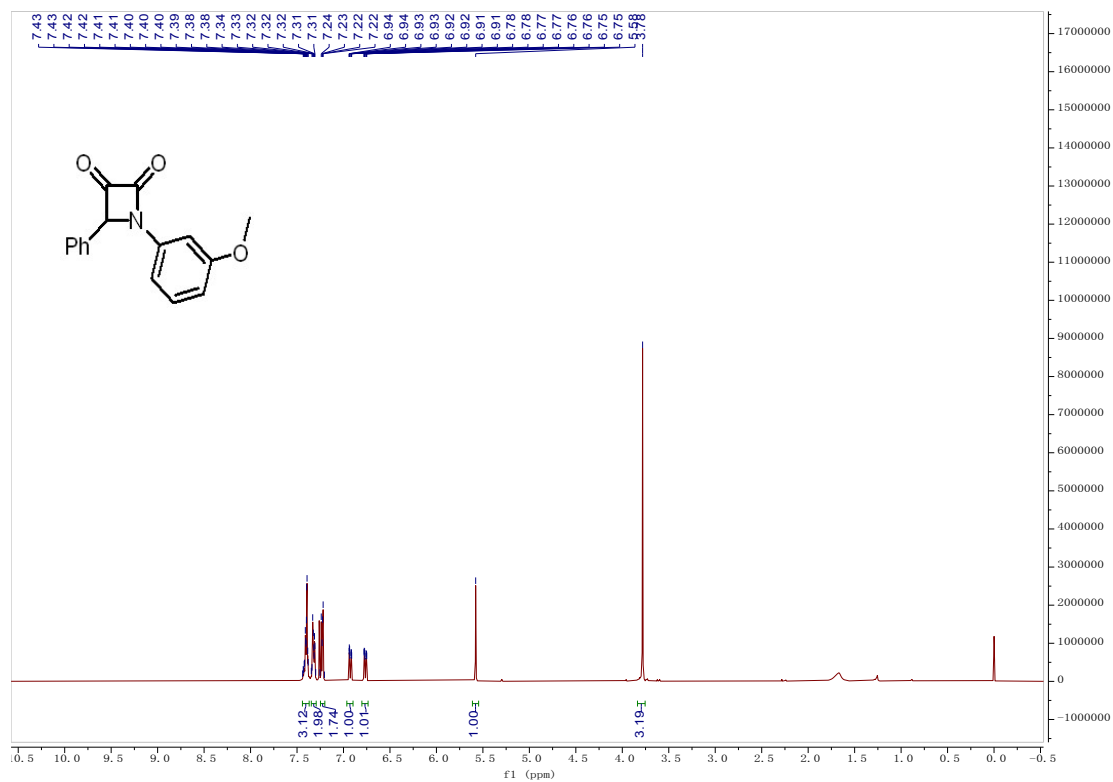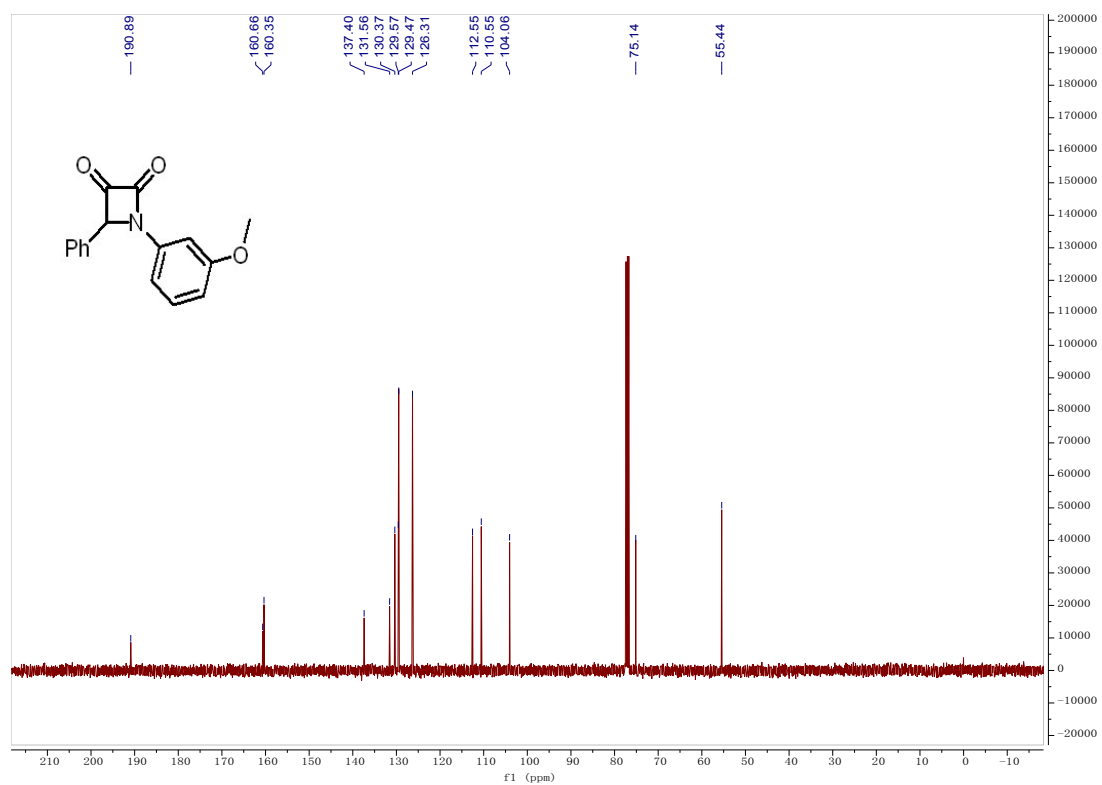

# $^1\text{H}$ NMR and $^{13}\text{C}$ NMR of 1g

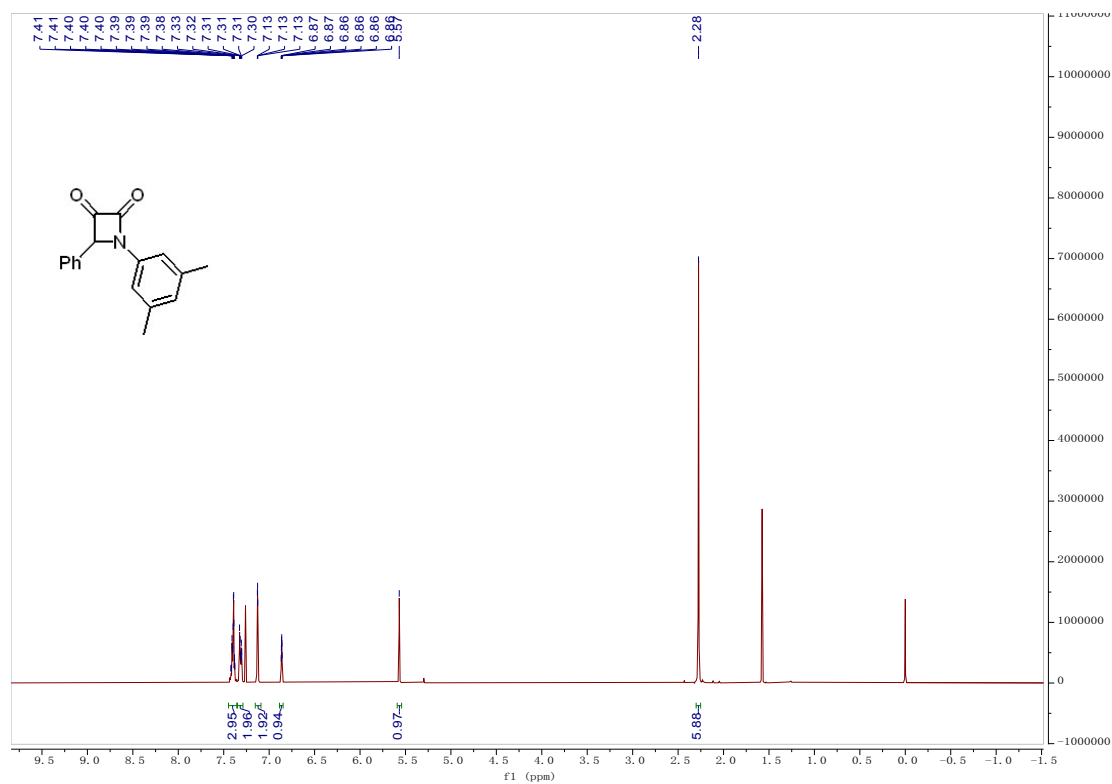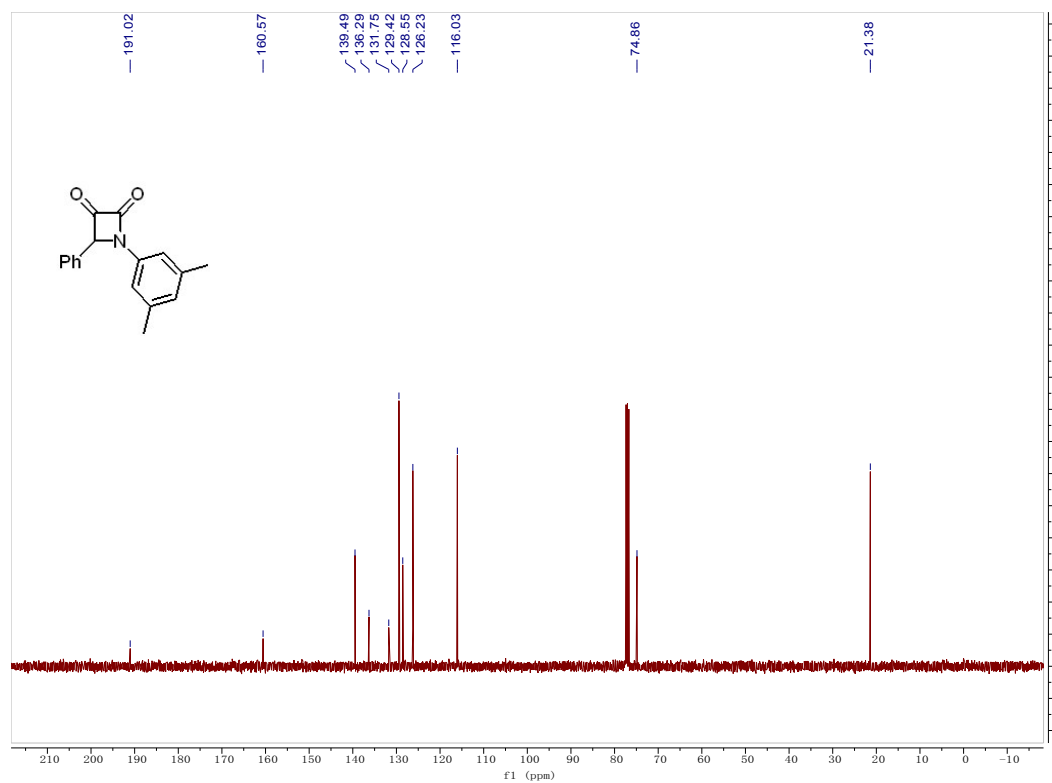



# <sup>1</sup>H NMR and <sup>13</sup>C NMR of 1h

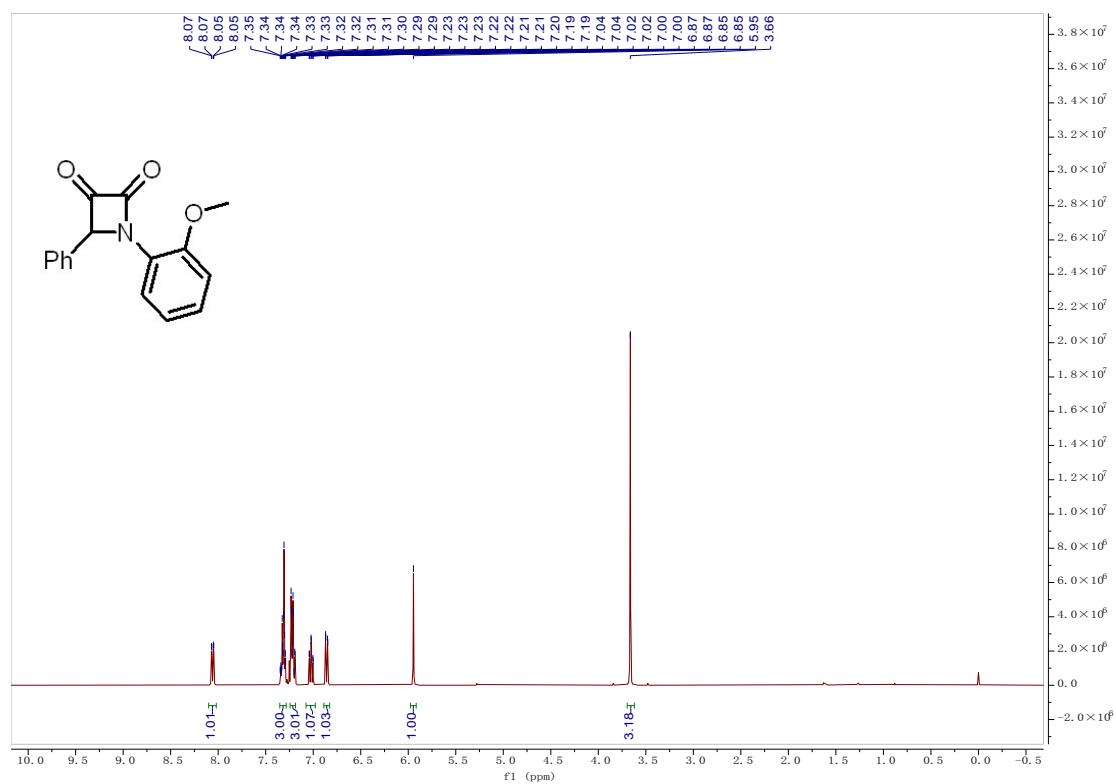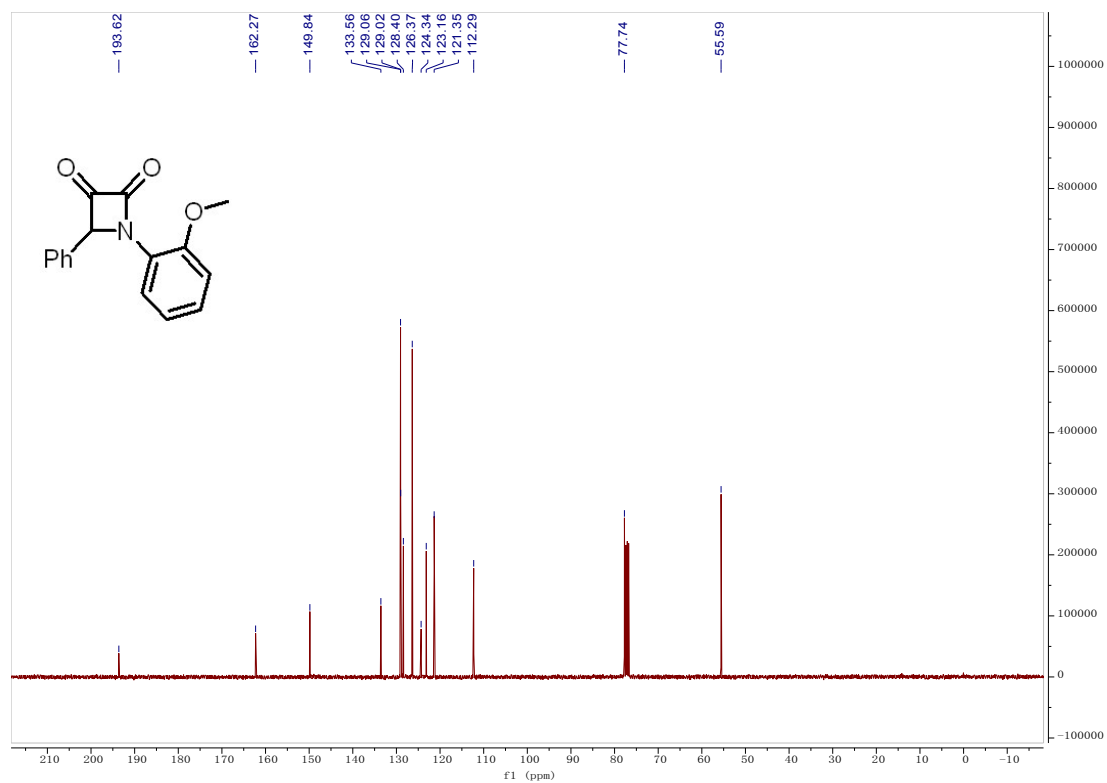

# <sup>1</sup>H NMR and <sup>13</sup>C NMR of 1i

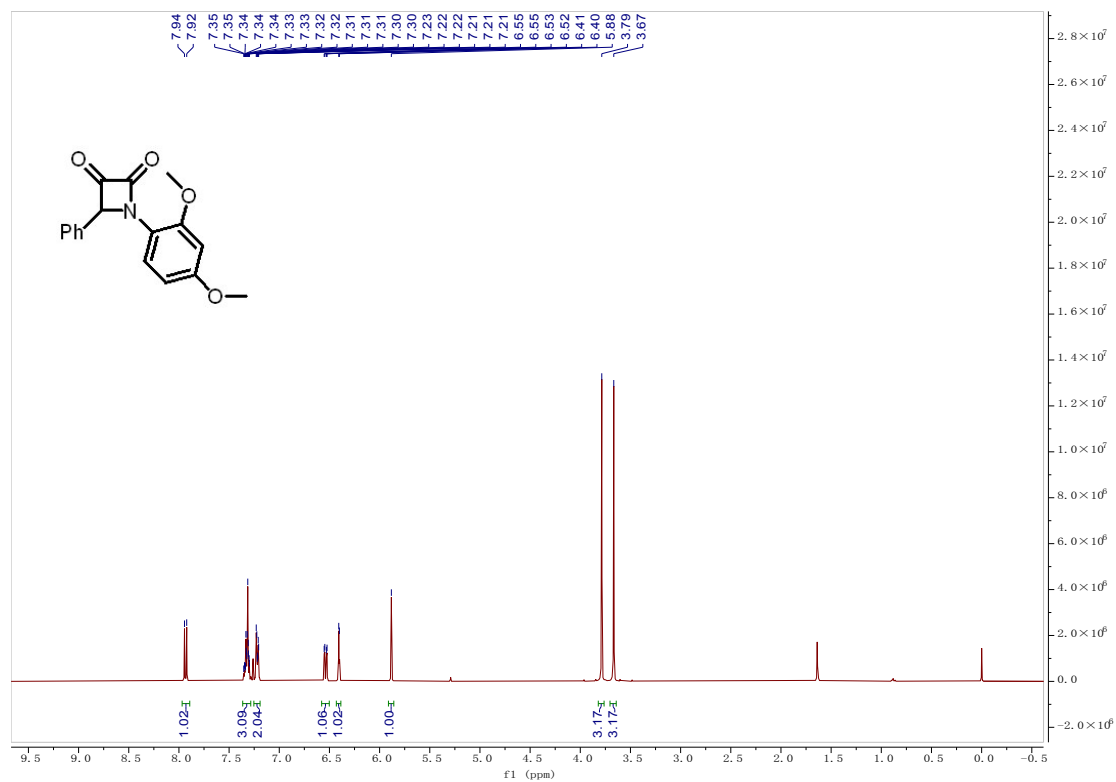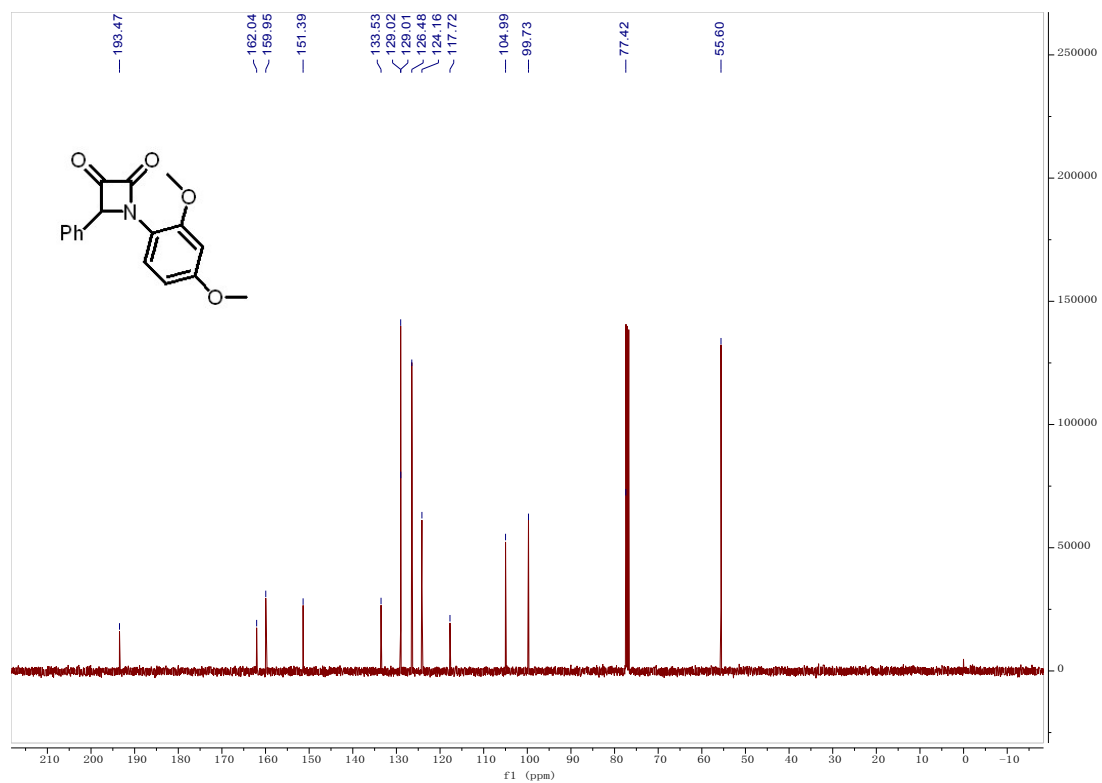

# <sup>1</sup>H NMR and <sup>13</sup>C NMR of 1j

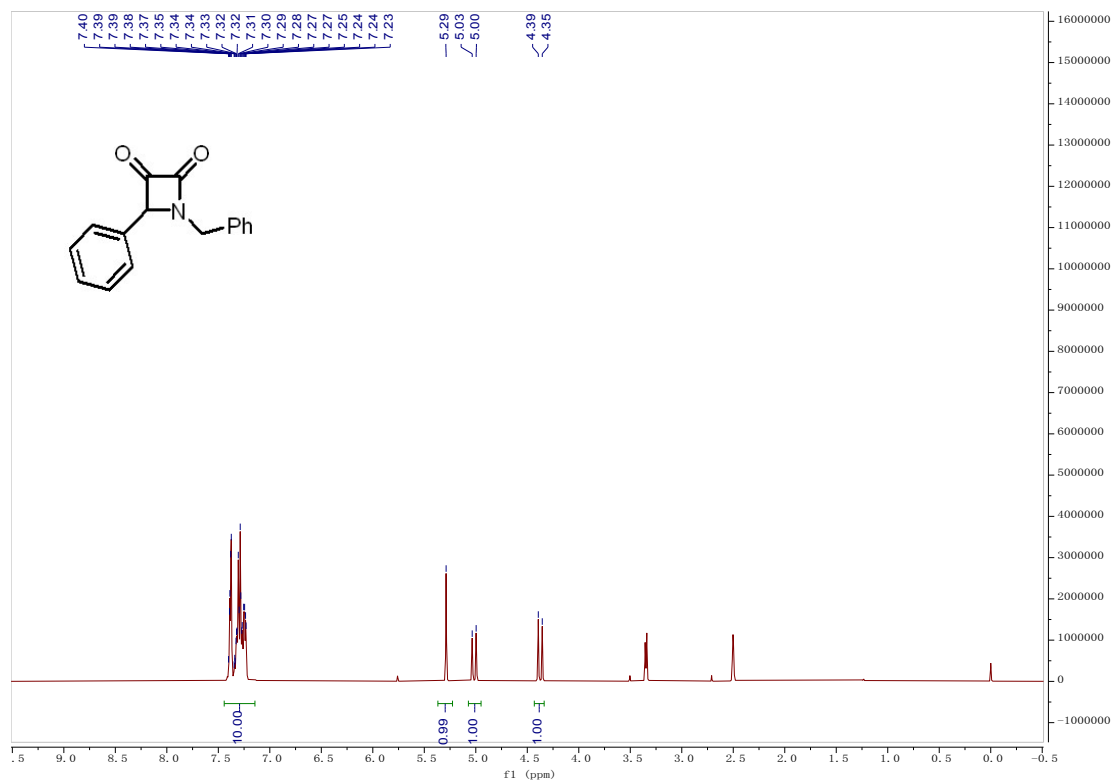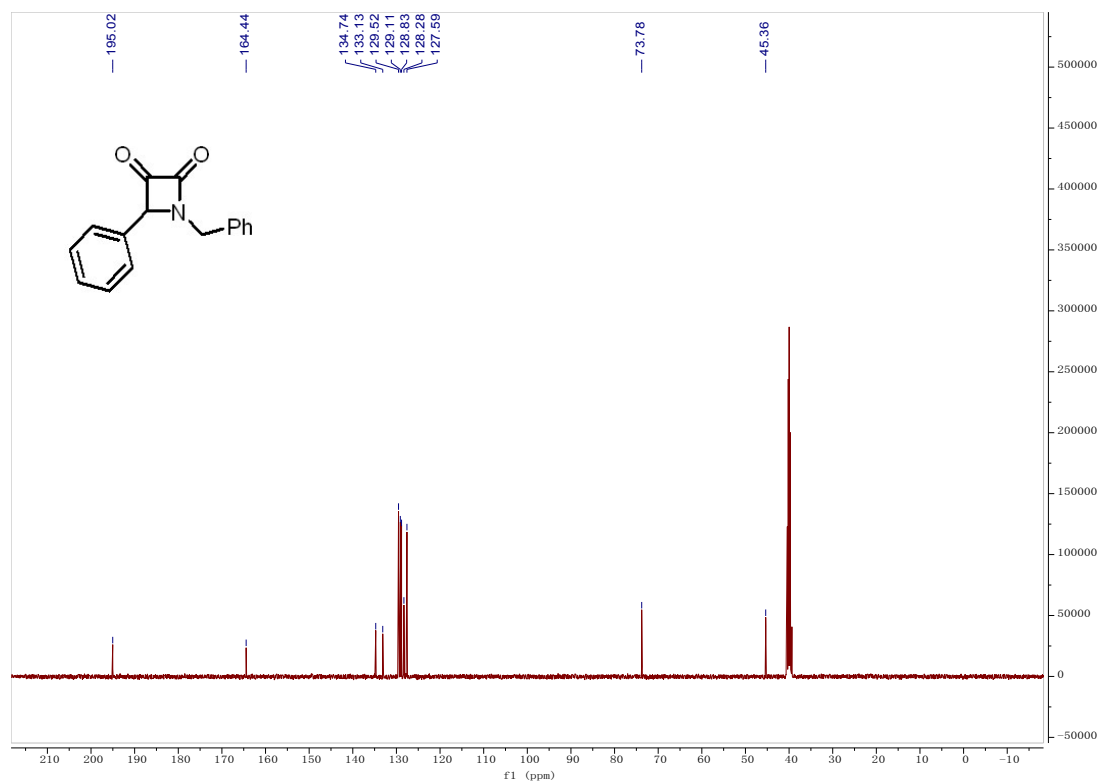

# $^1\text{H}$ NMR and $^{13}\text{C}$ NMR of 1k

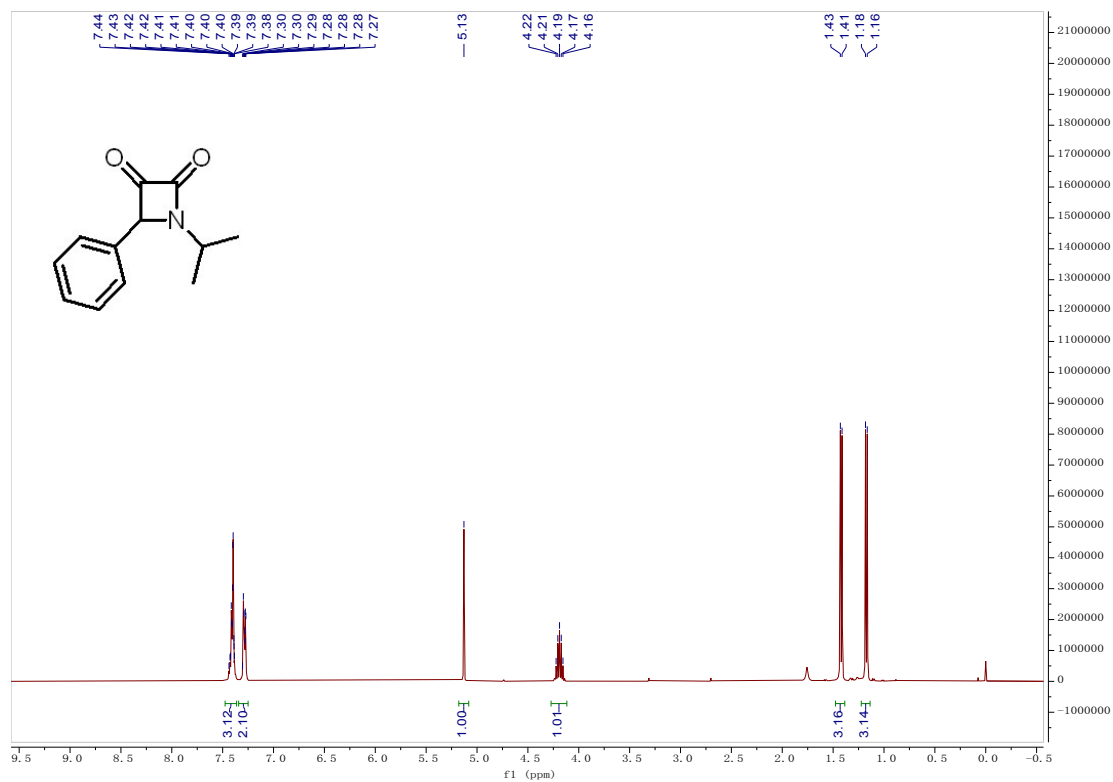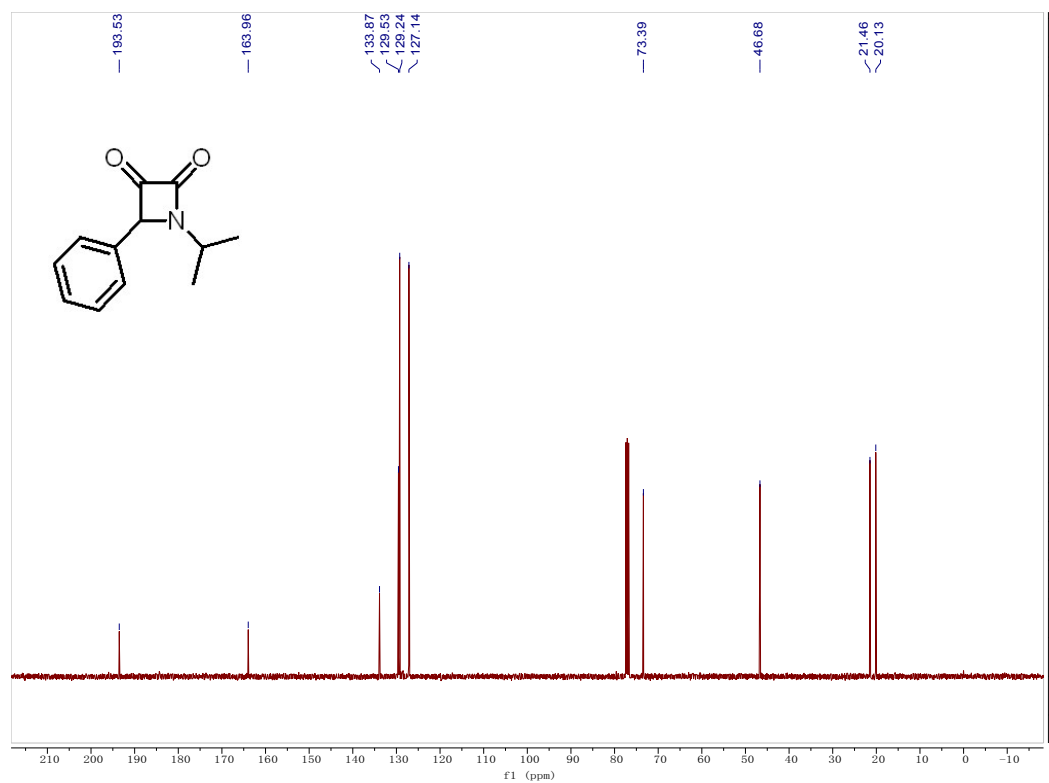

# $^1\text{H}$ NMR and $^{13}\text{C}$ NMR of 11

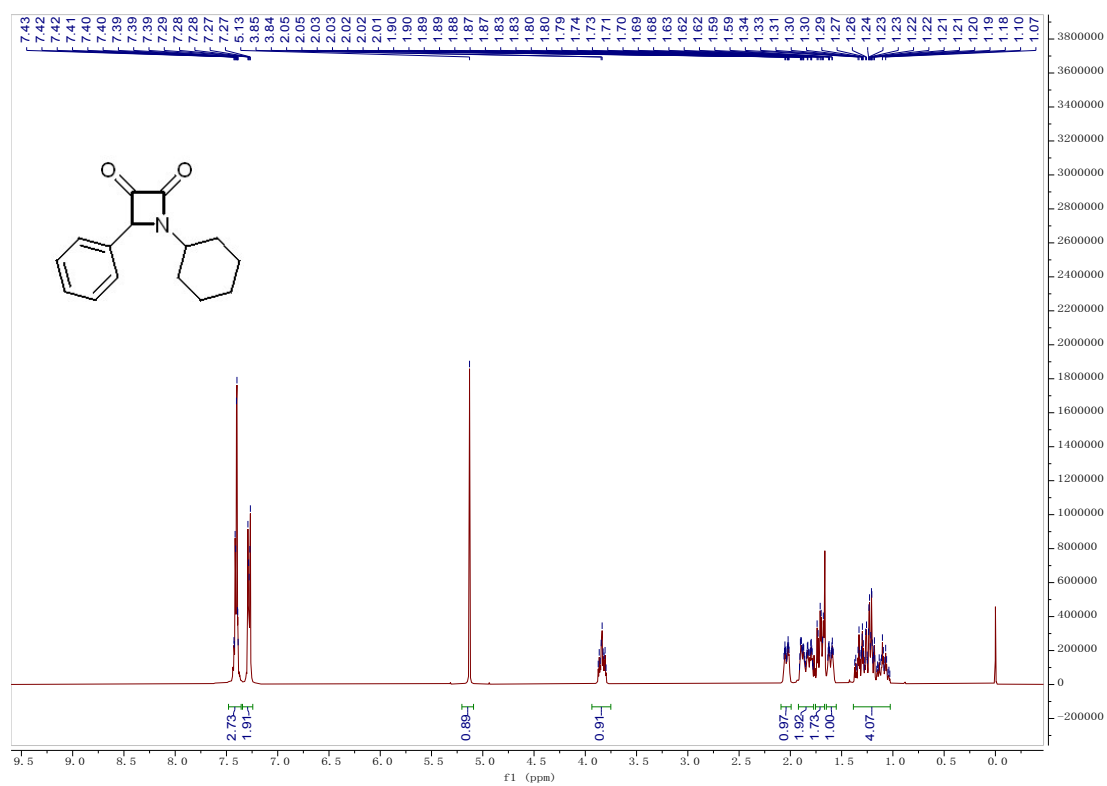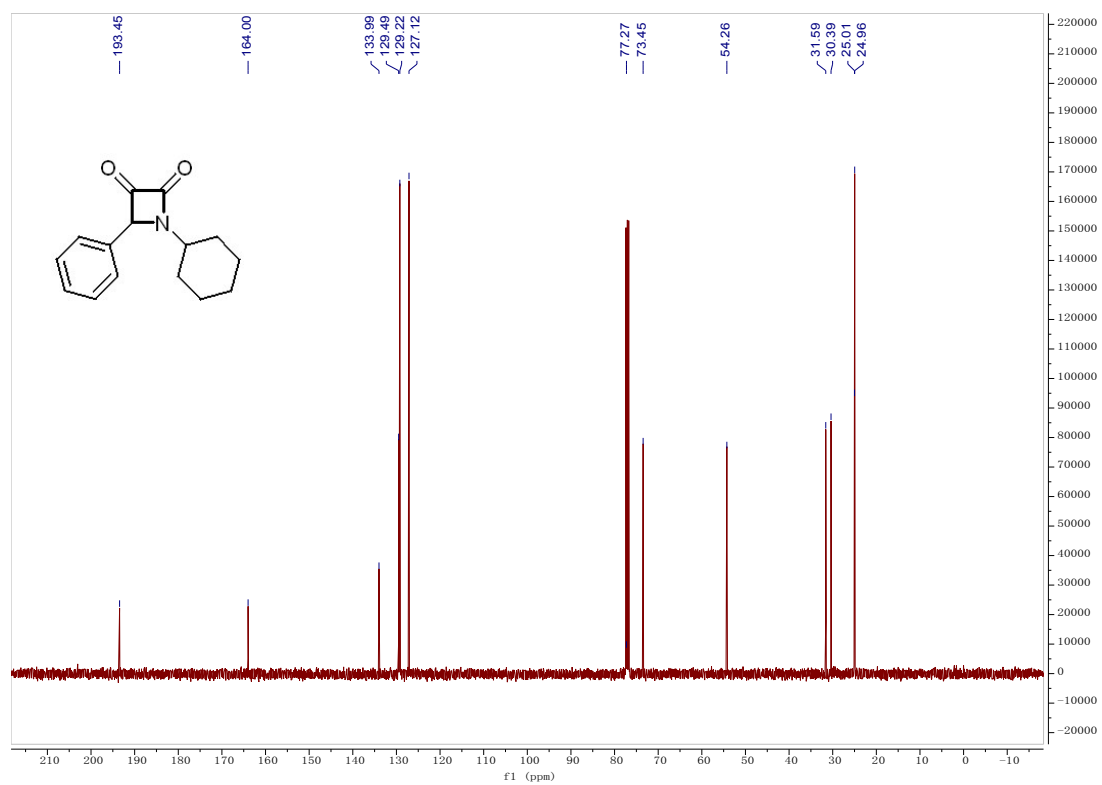

# <sup>1</sup>H NMR and <sup>13</sup>C NMR of 1m

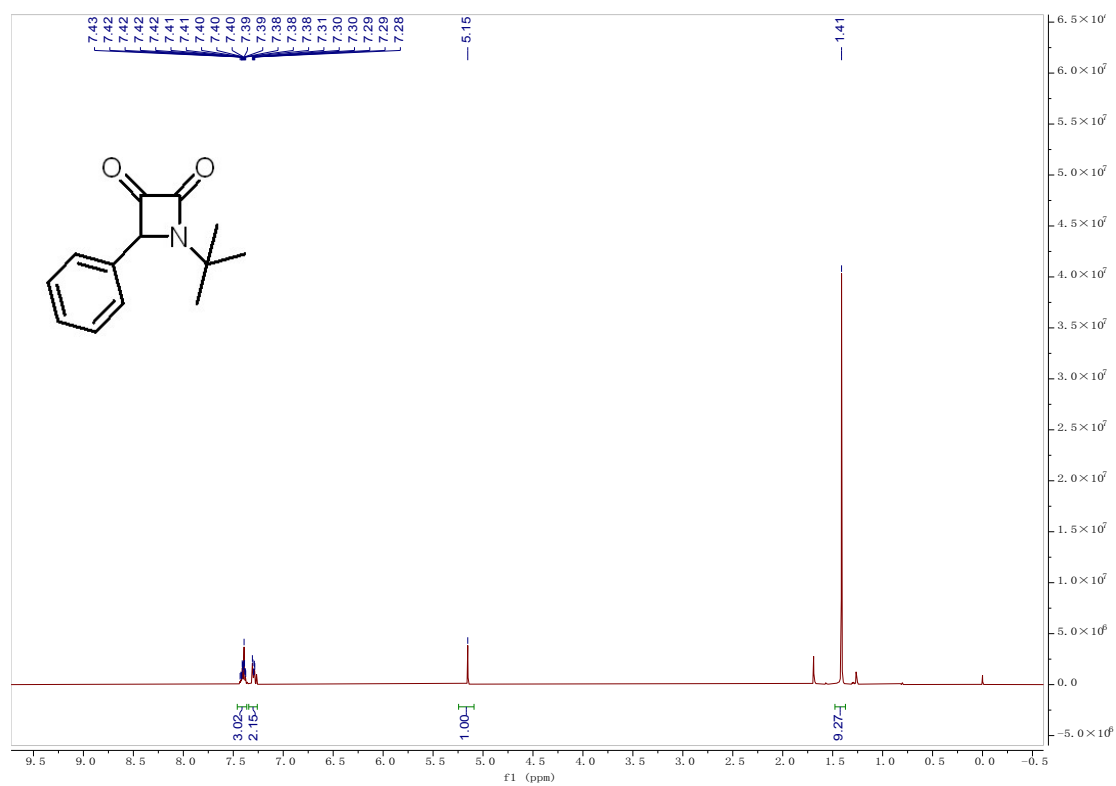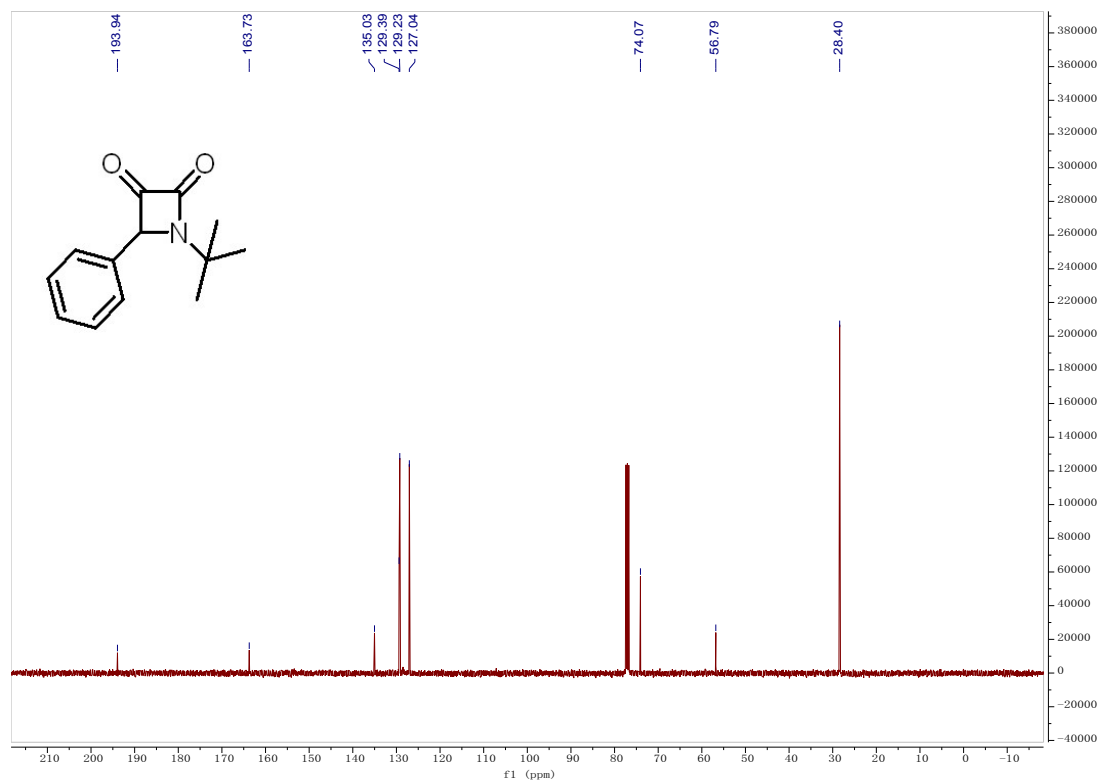

# <sup>1</sup>H NMR and <sup>13</sup>C NMR of 1n

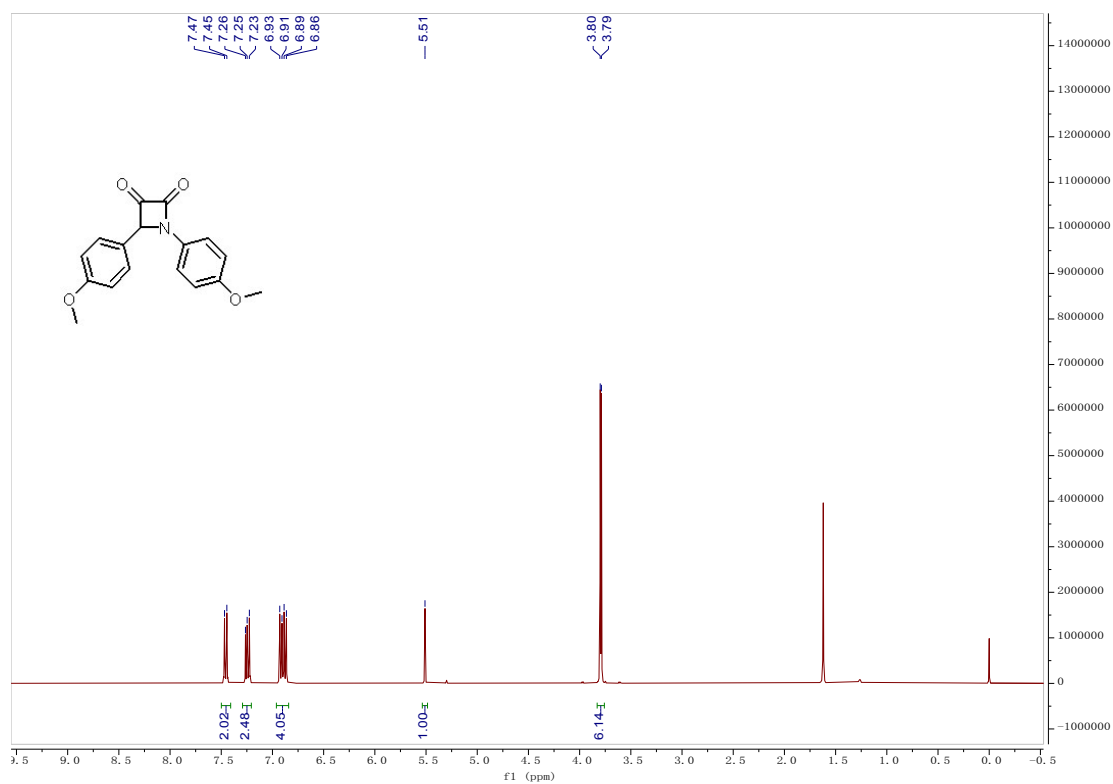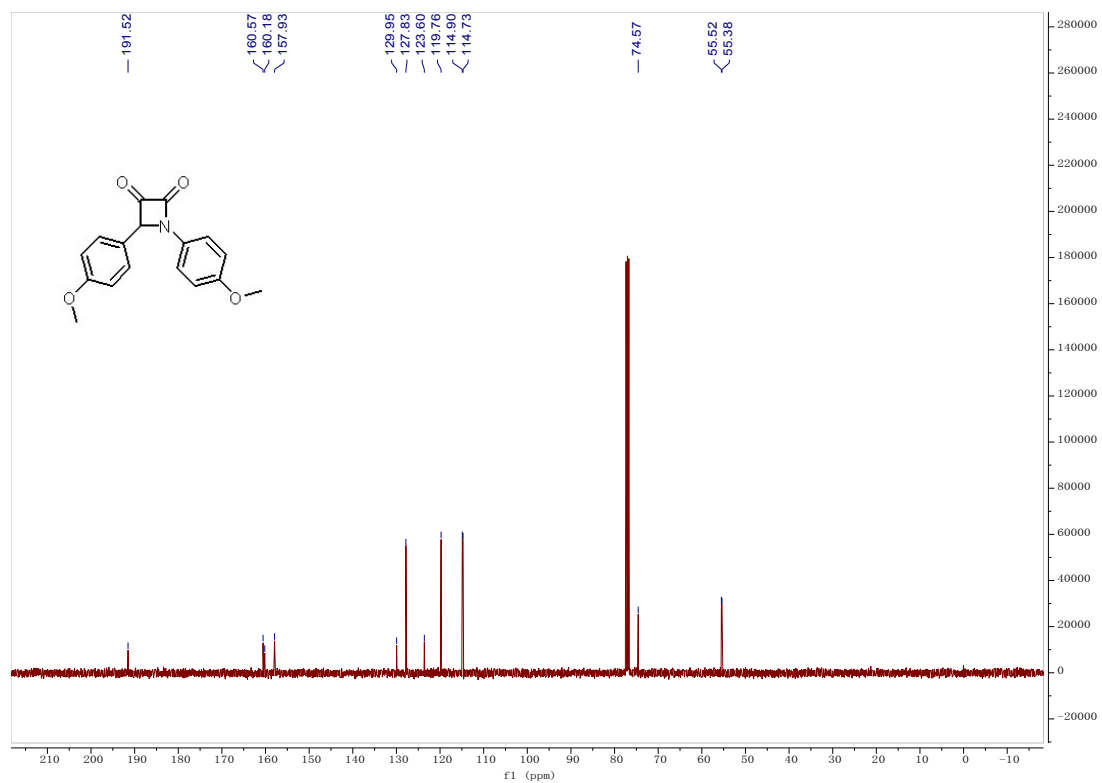

# <sup>1</sup>H NMR and <sup>13</sup>C NMR of 1o

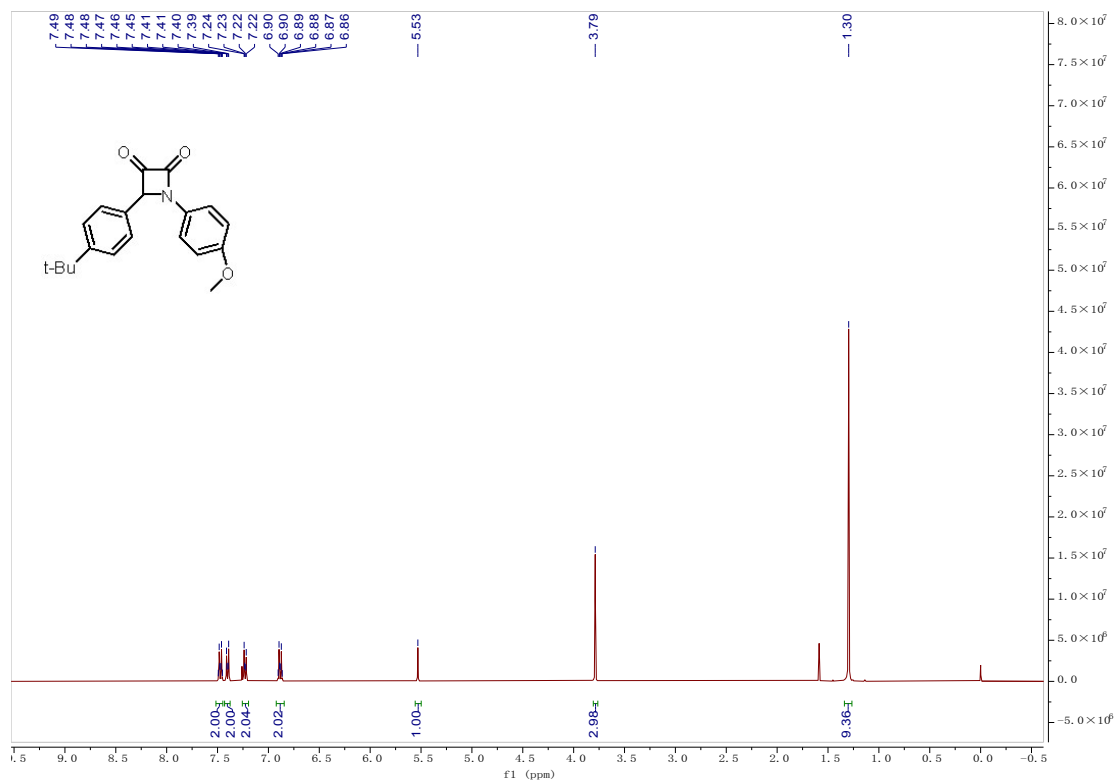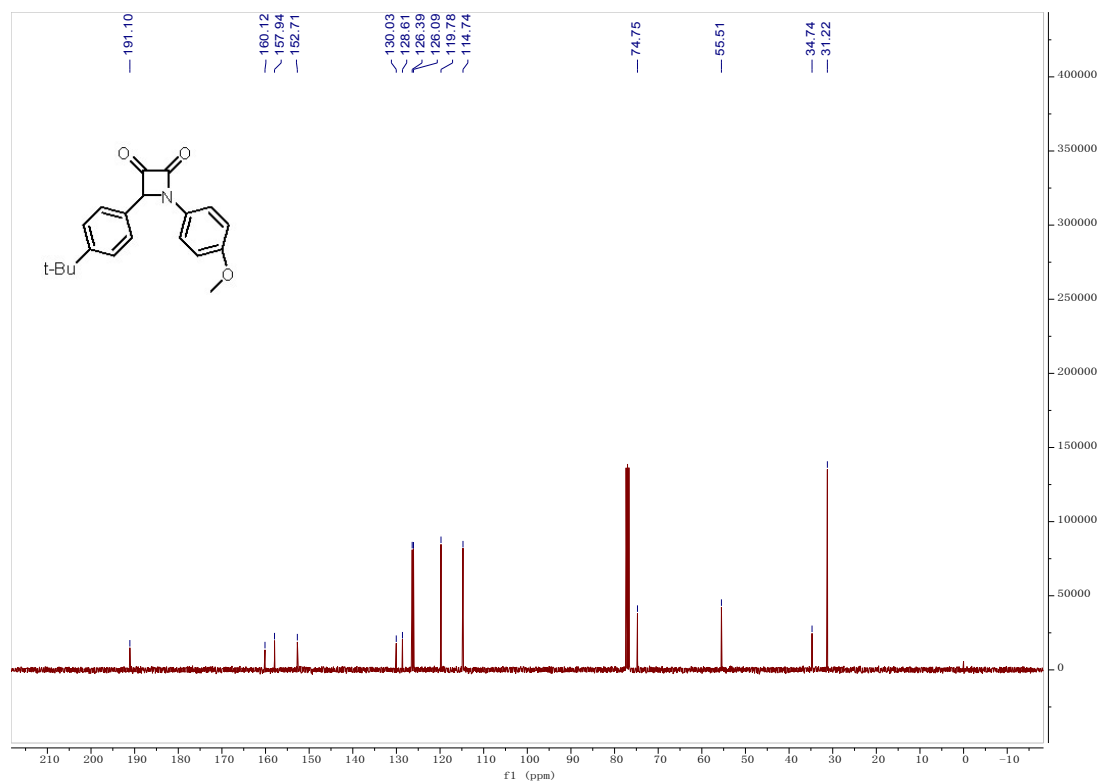



# <sup>1</sup>H NMR and <sup>13</sup>C NMR of 1p

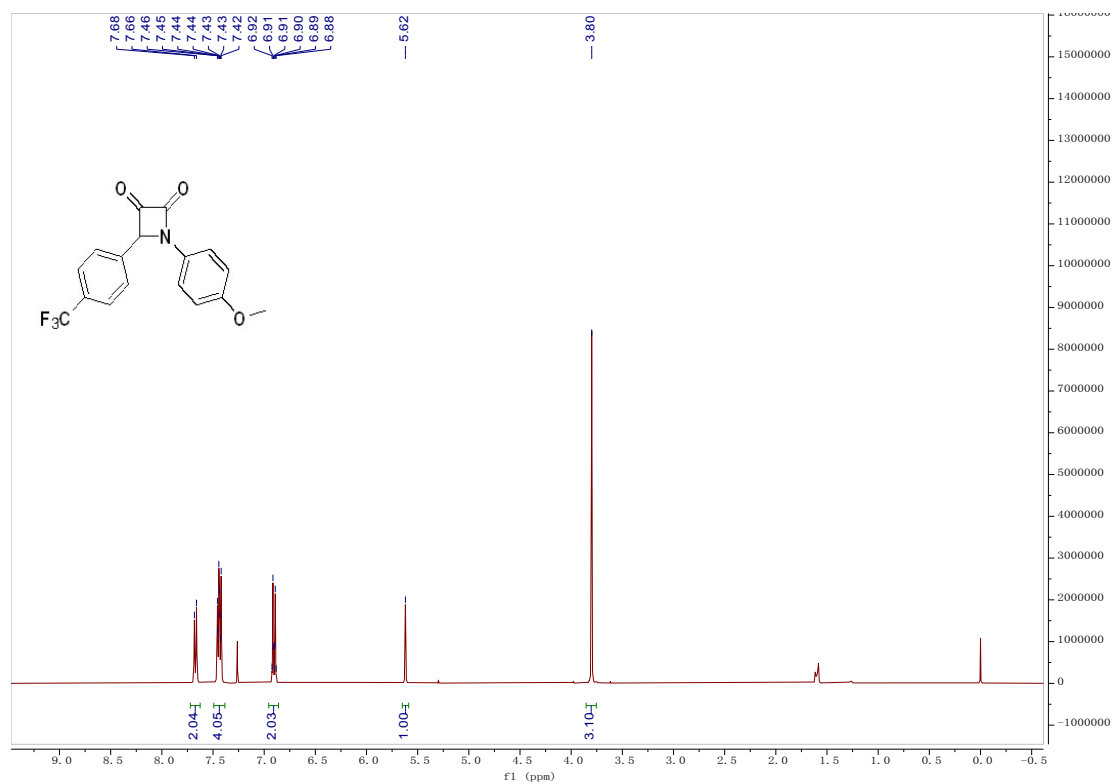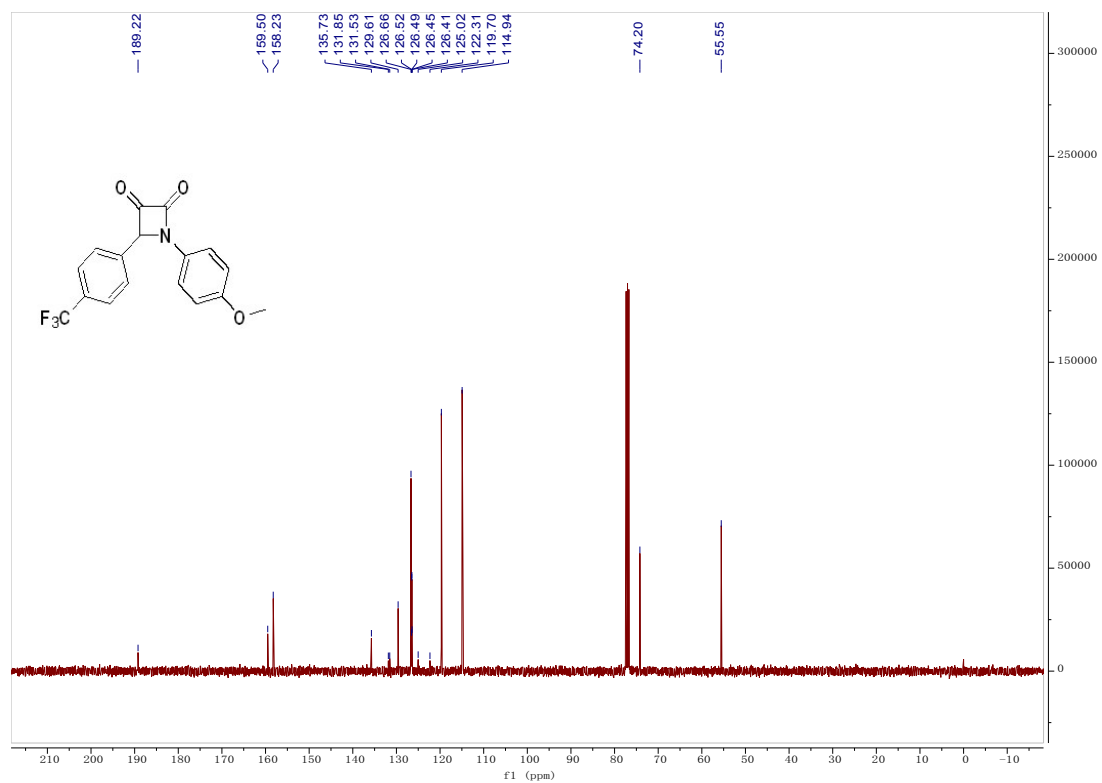

# <sup>1</sup>H NMR and <sup>13</sup>C NMR of 1q

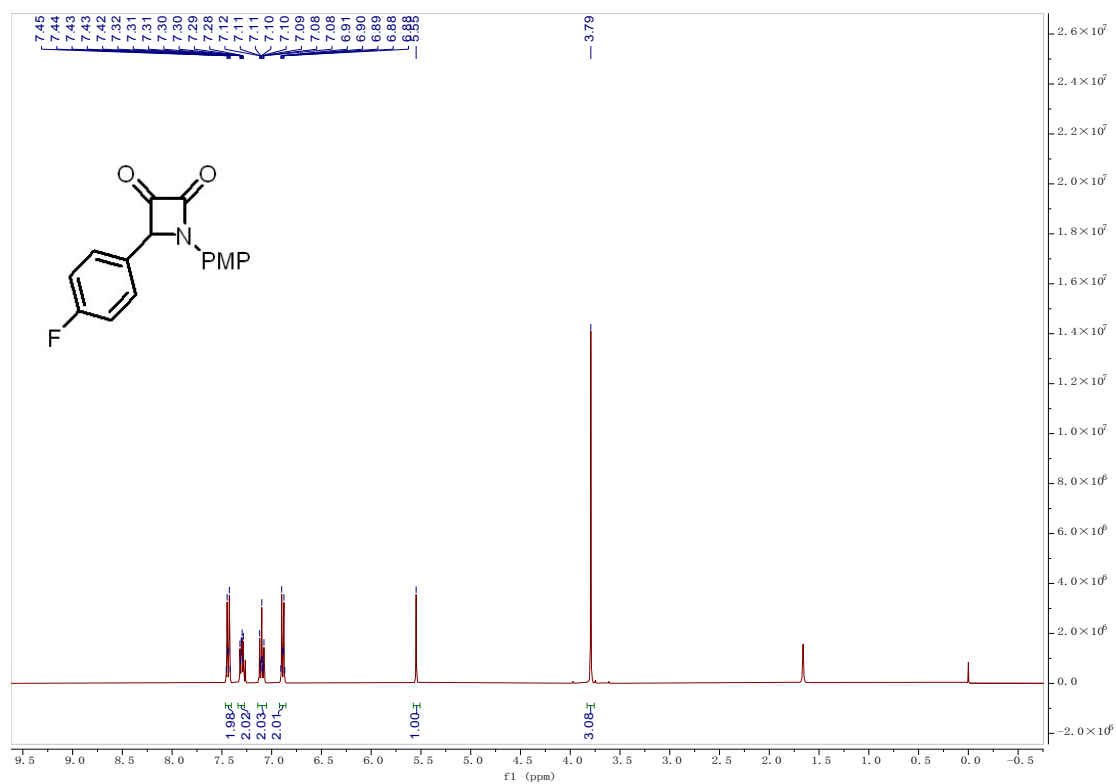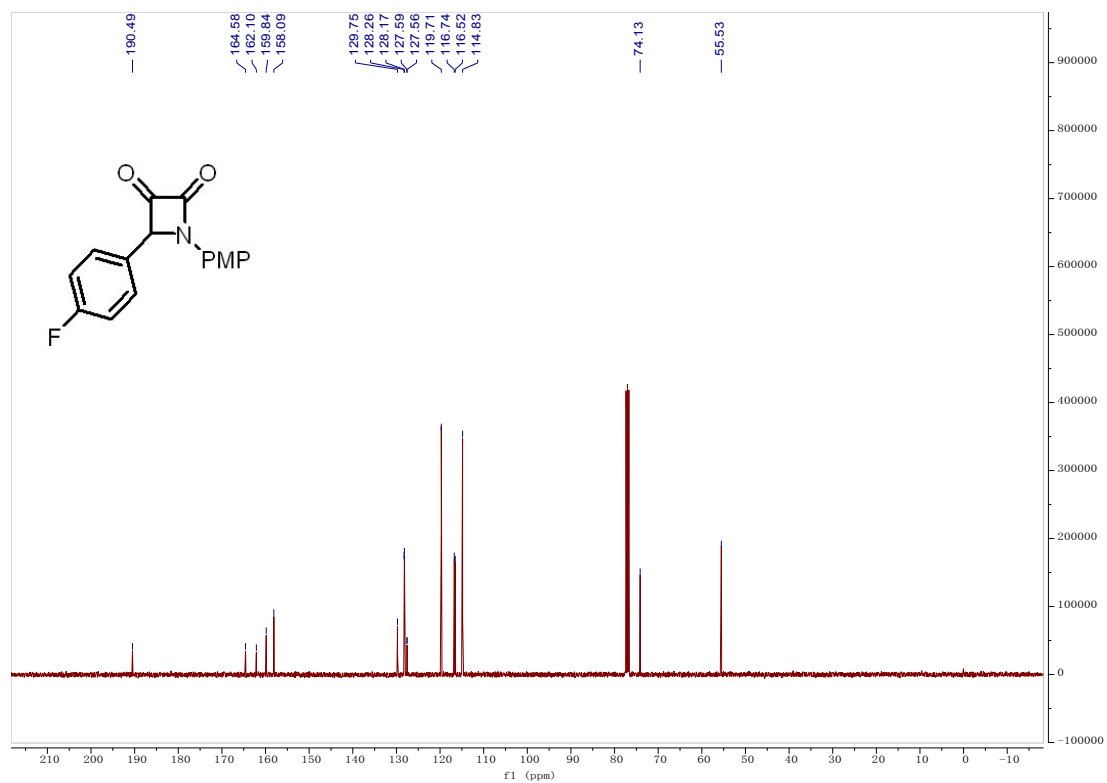

# $^1\text{H}$ NMR and $^{13}\text{C}$ NMR of 1r

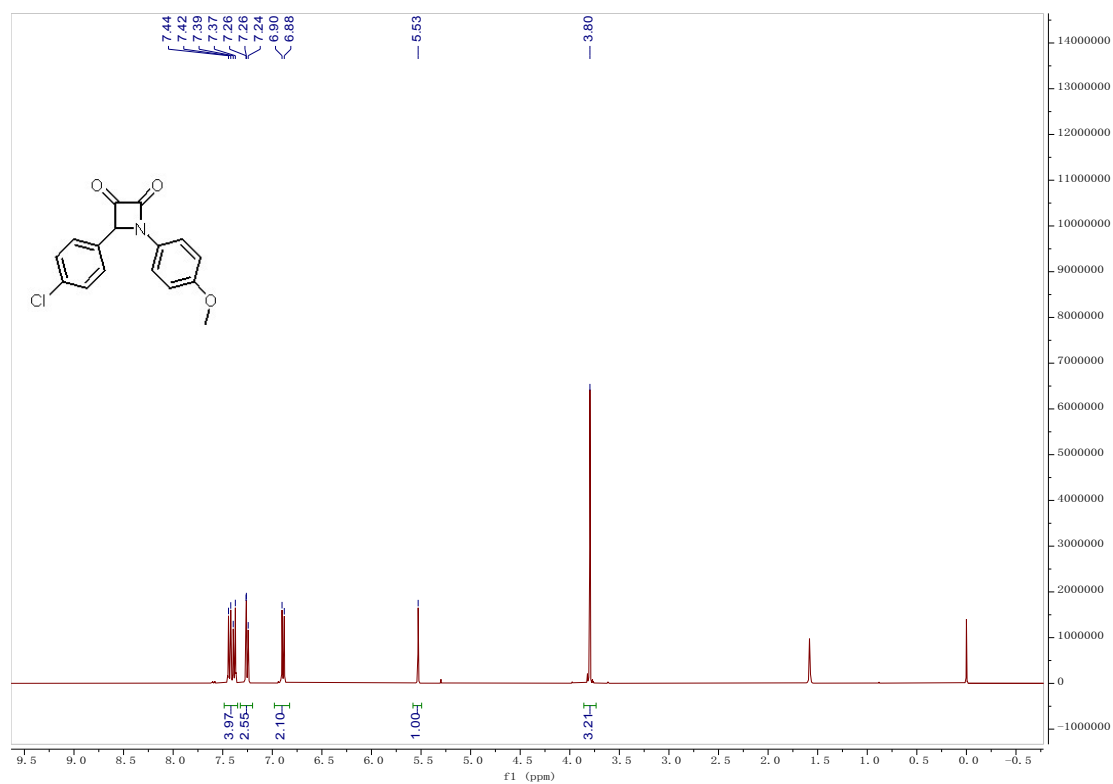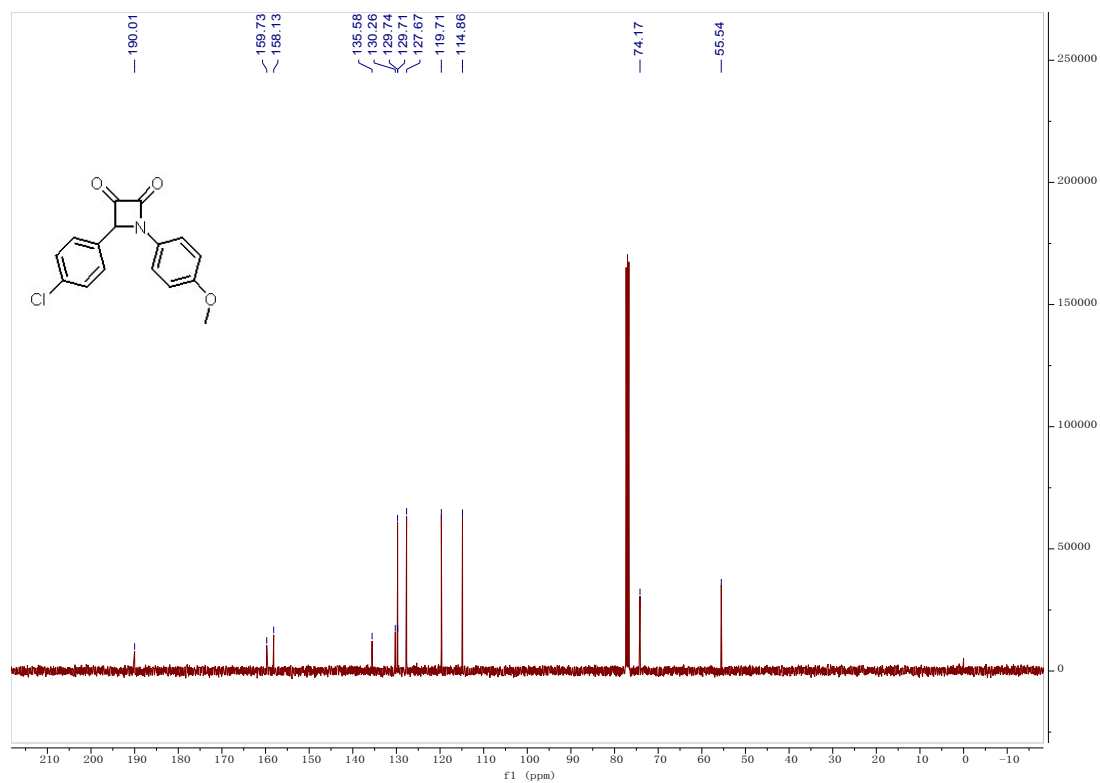

# <sup>1</sup>H NMR and <sup>13</sup>C NMR of 1s

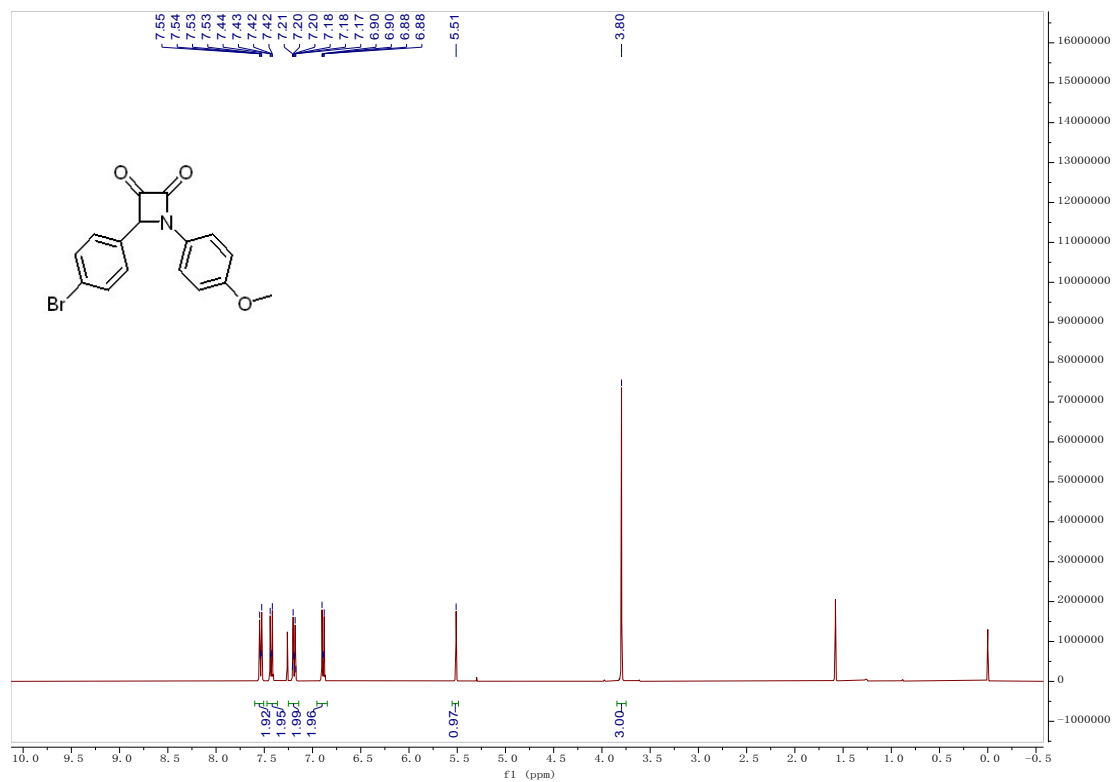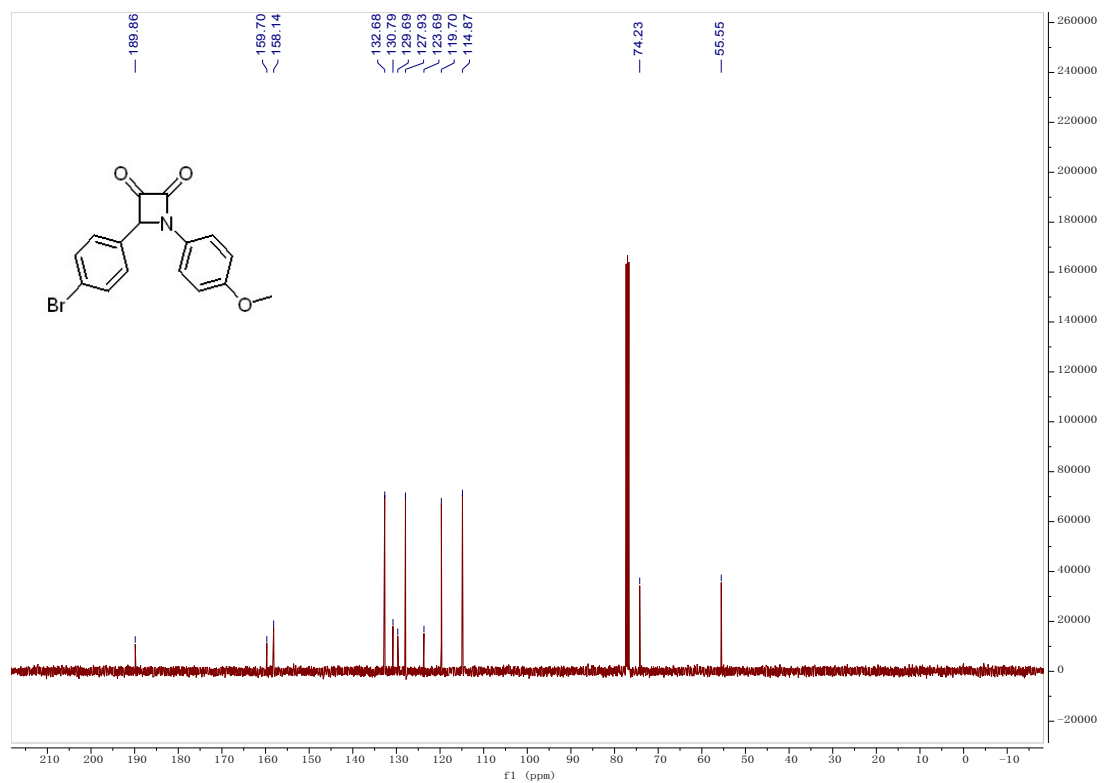

# <sup>1</sup>H NMR and <sup>13</sup>C NMR of 1t

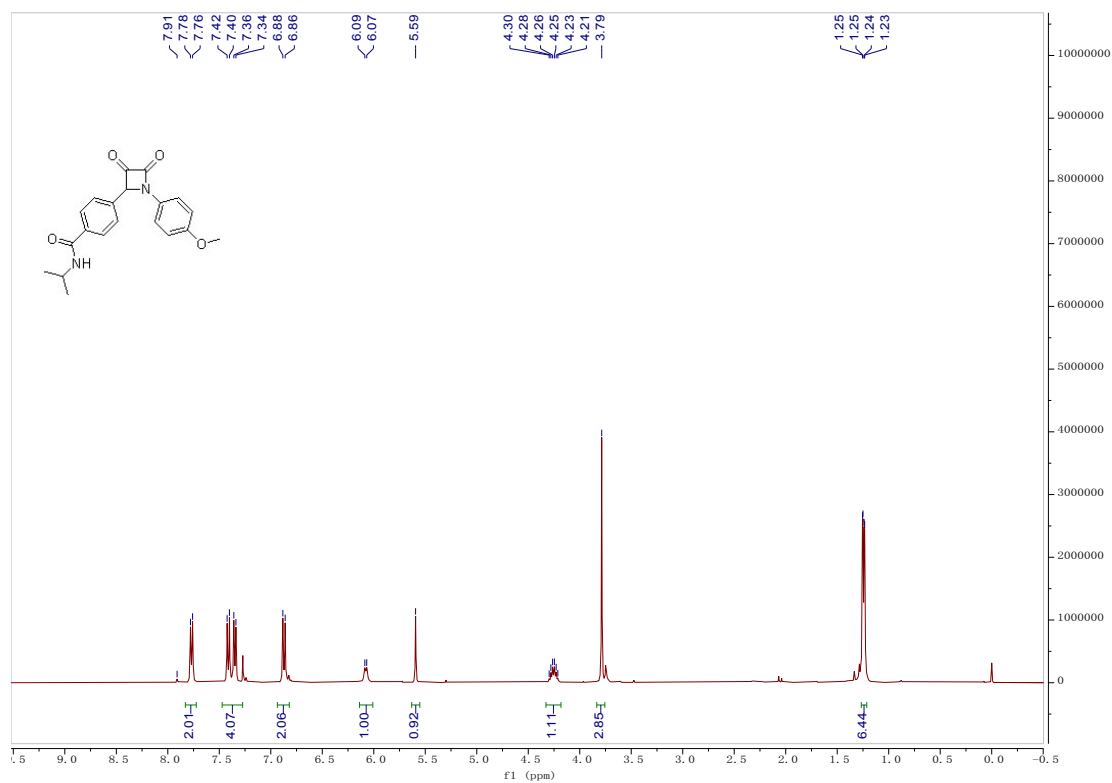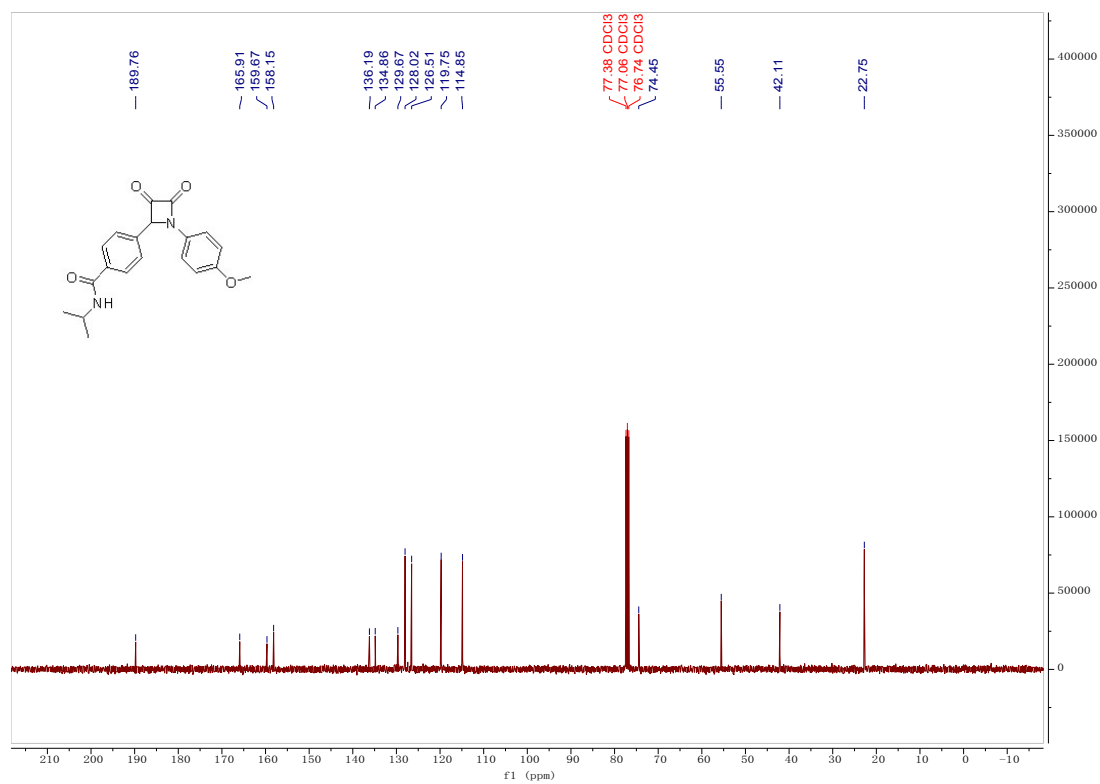

# $^1\text{H}$ NMR and $^{13}\text{C}$ NMR of 1u

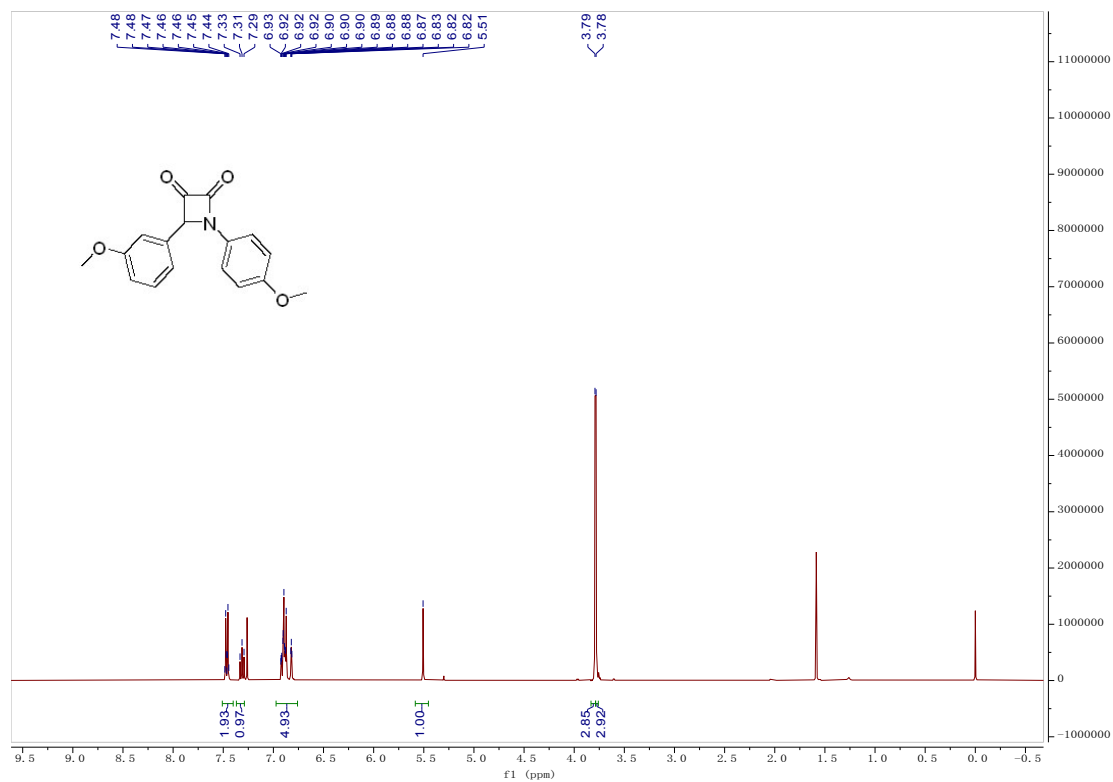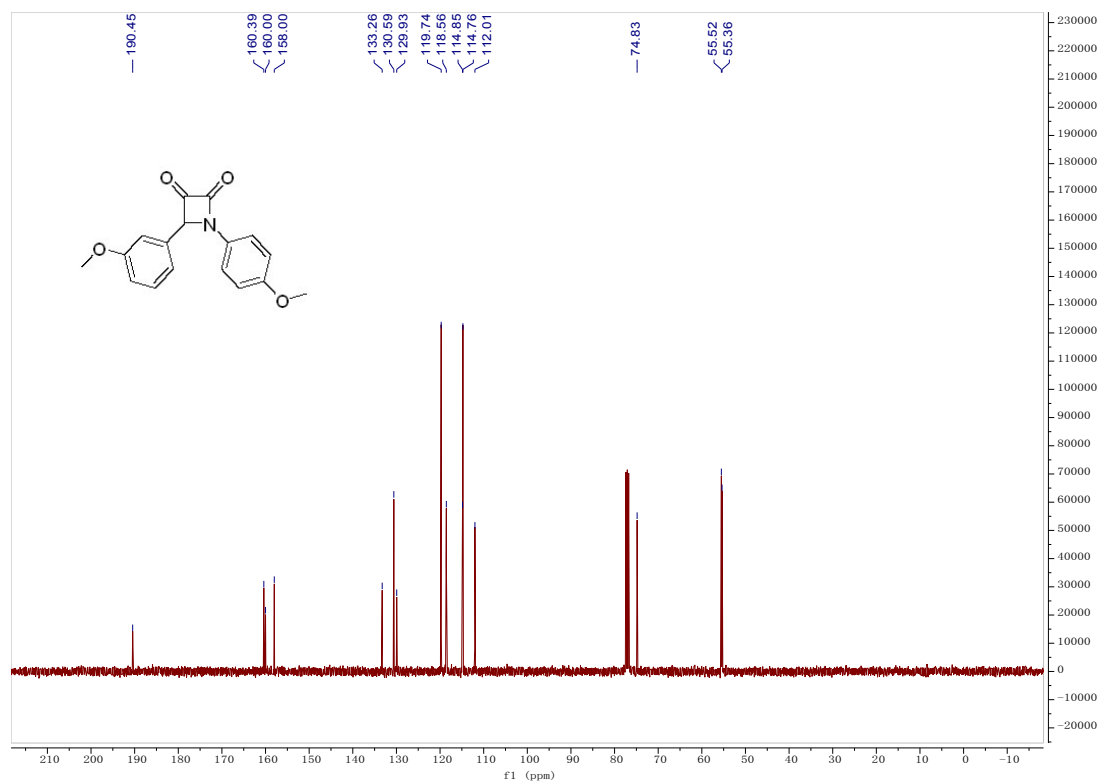

# <sup>1</sup>H NMR and <sup>13</sup>C NMR of 1v

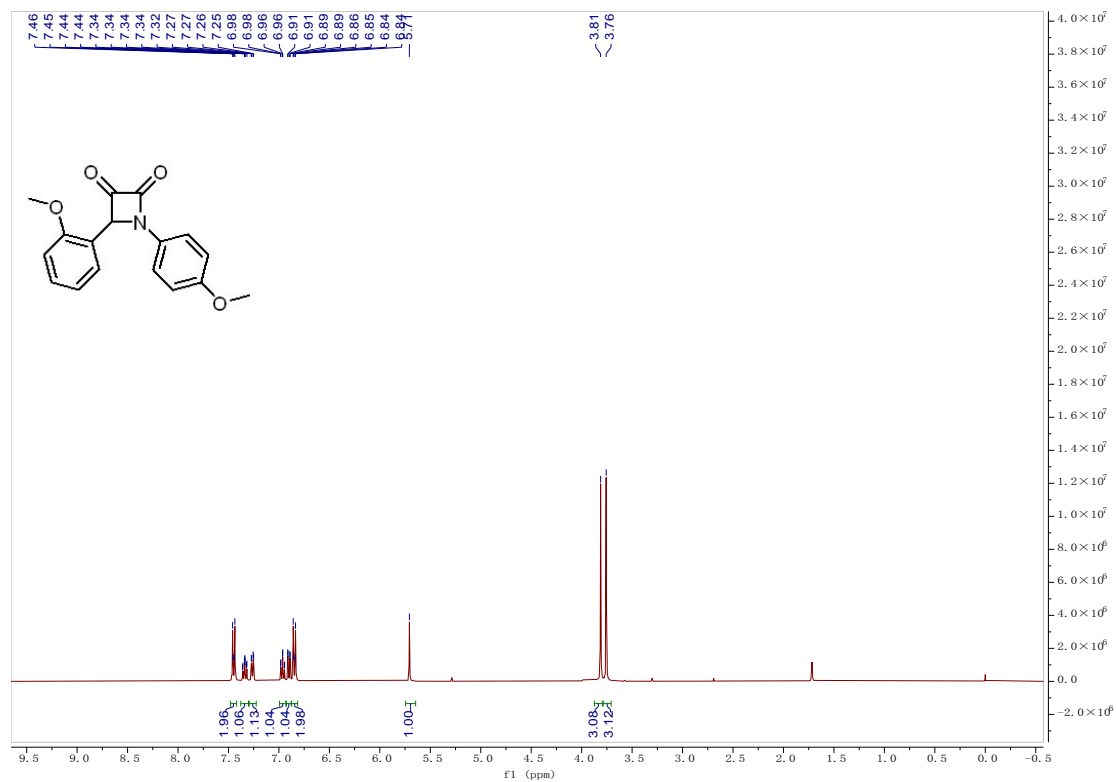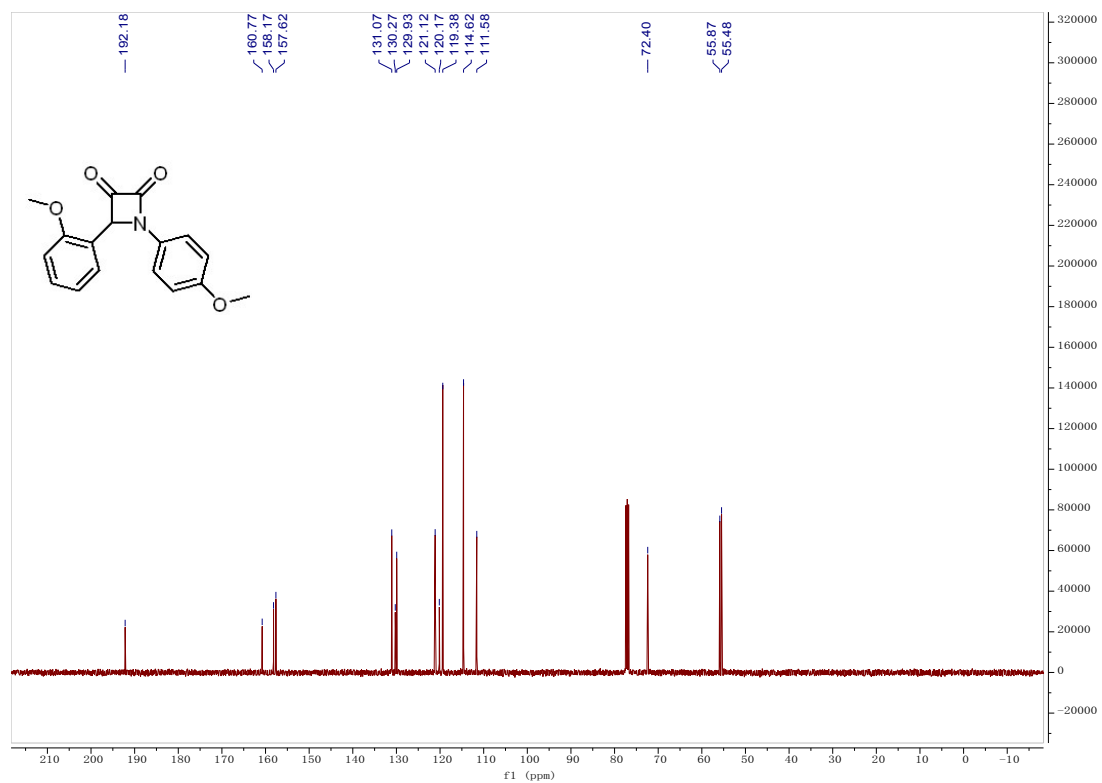

# $^1\text{H}$ NMR and $^{13}\text{C}$ NMR of 1w

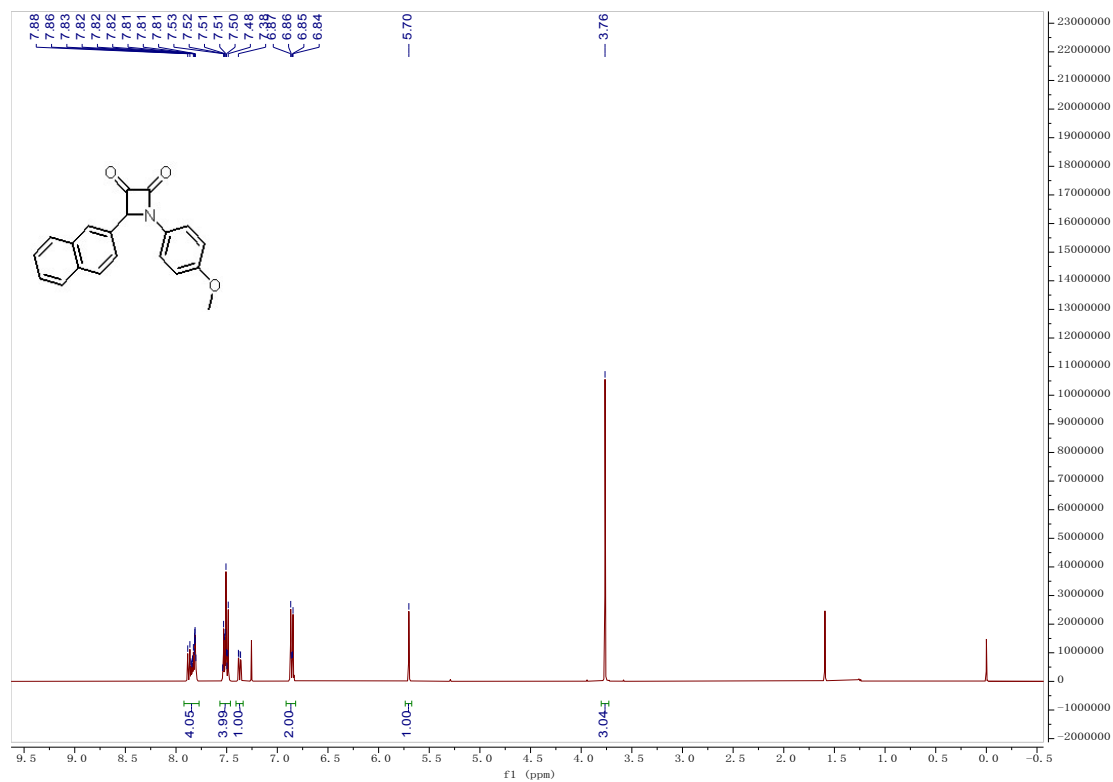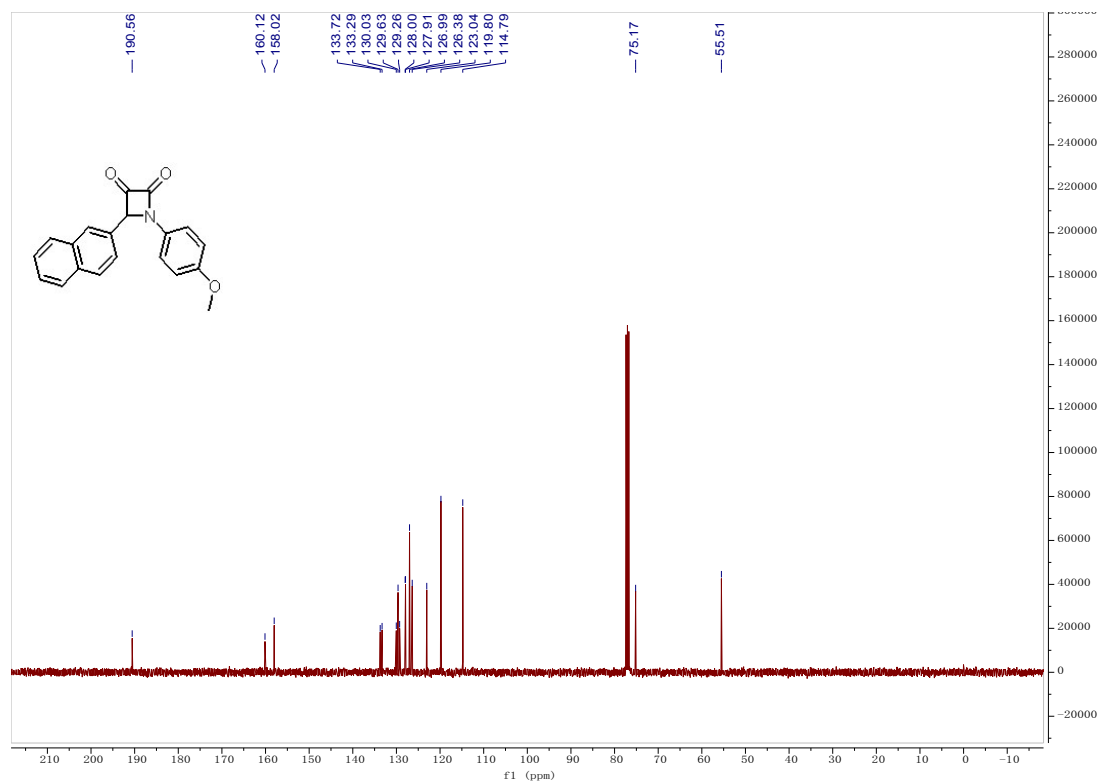



# $^1\text{H}$ NMR and $^{13}\text{C}$ NMR of 1x

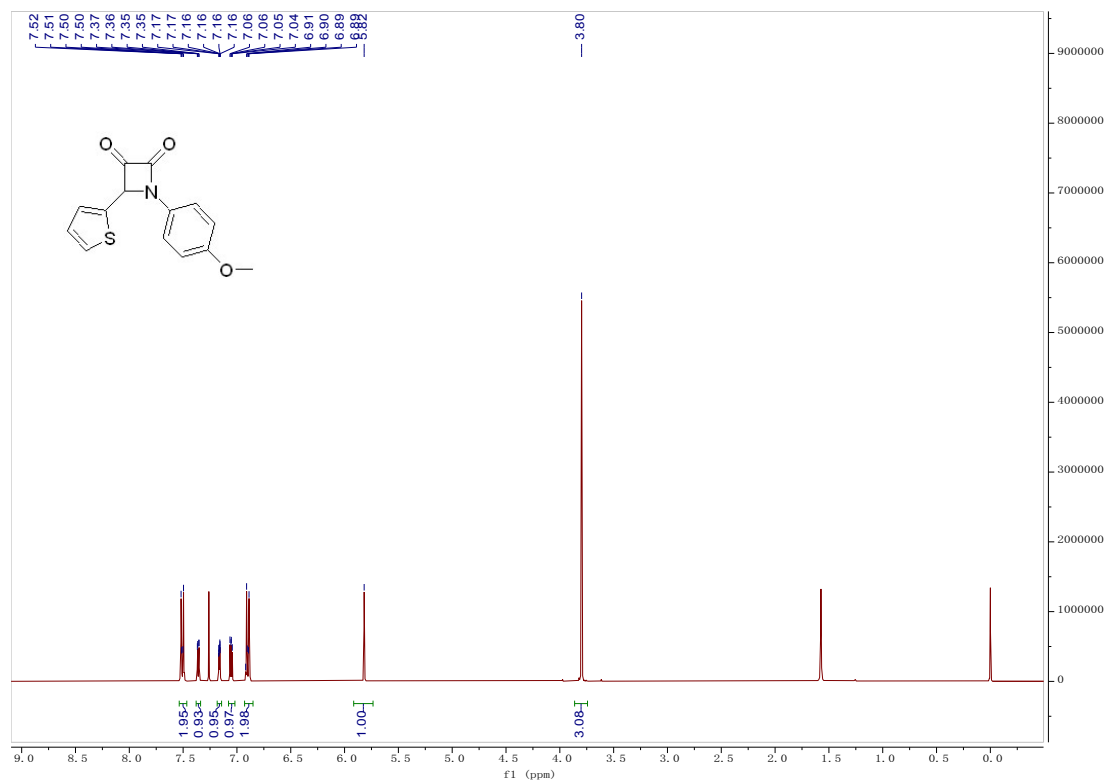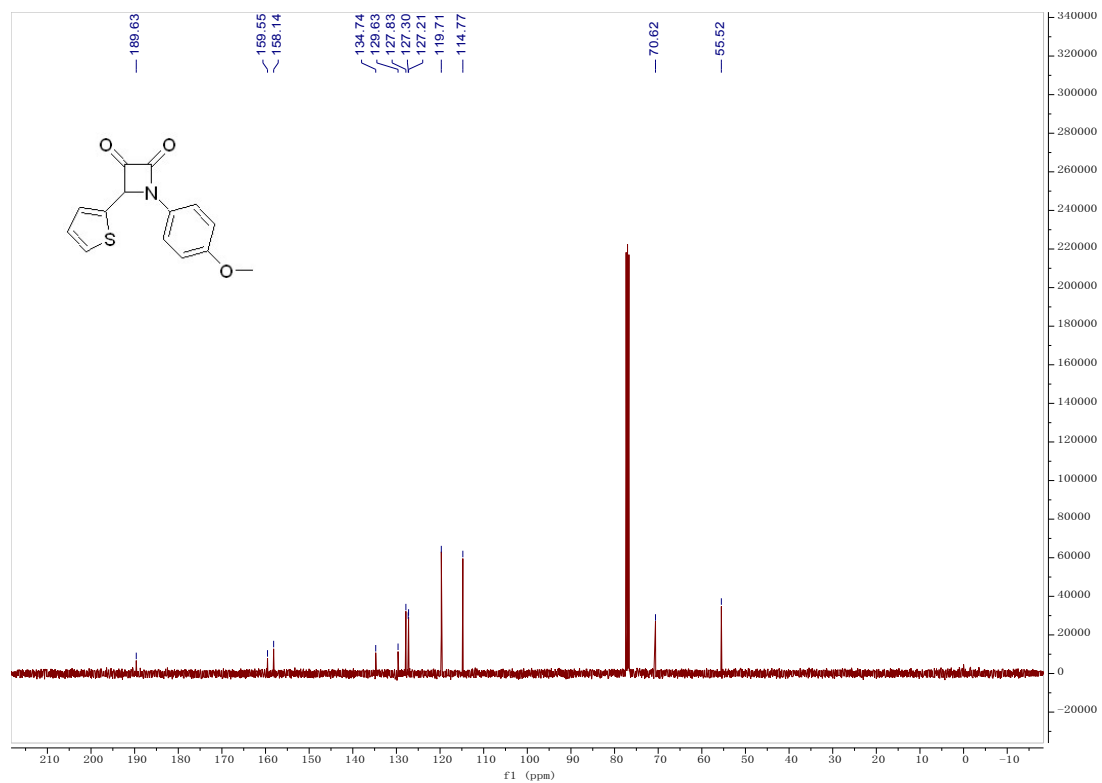

# <sup>1</sup>H NMR and <sup>13</sup>C NMR of 1y

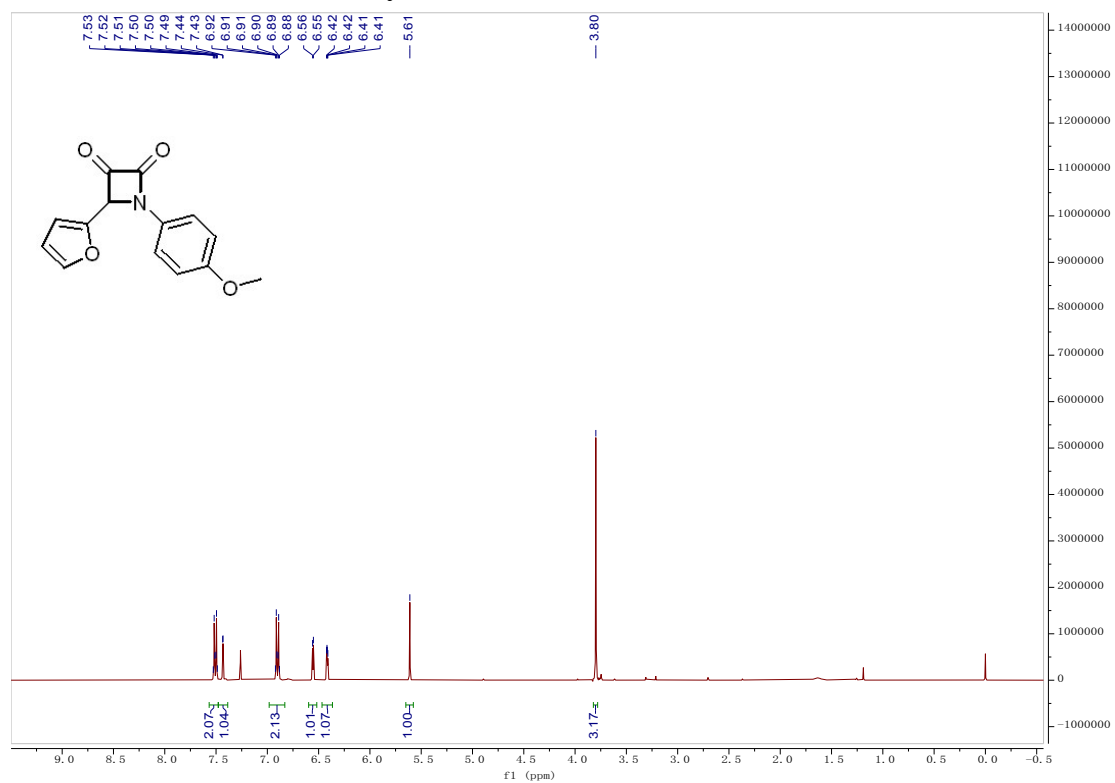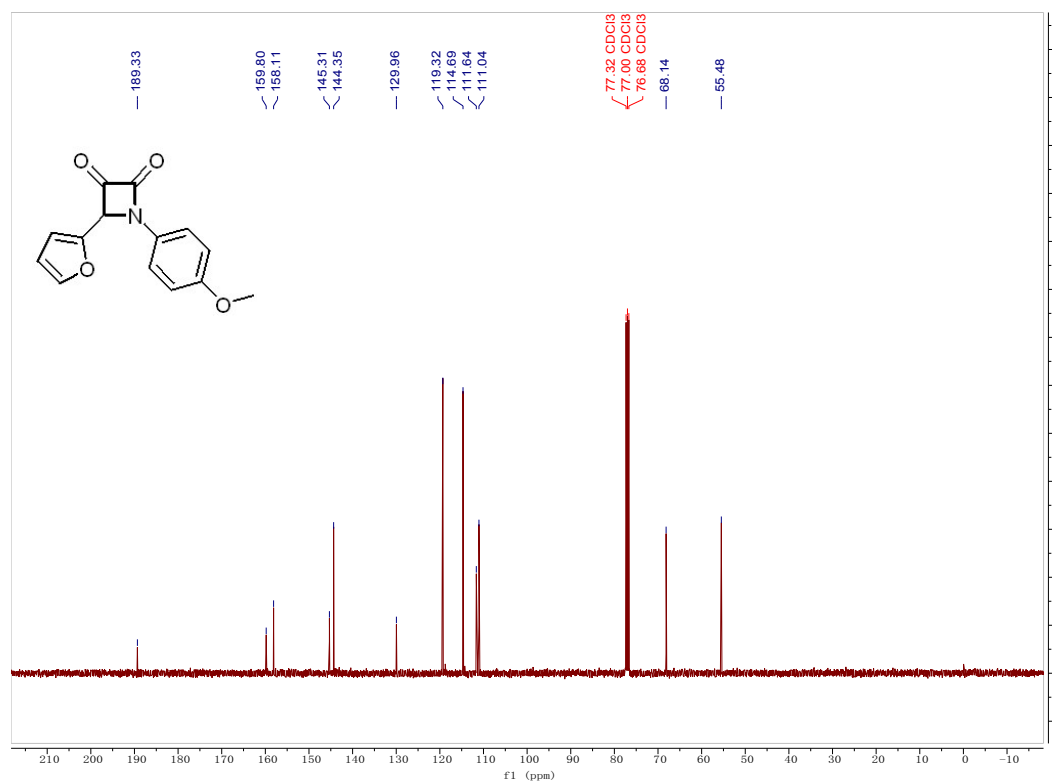

# $^1\text{H}$ NMR and $^{13}\text{C}$ NMR of 1z

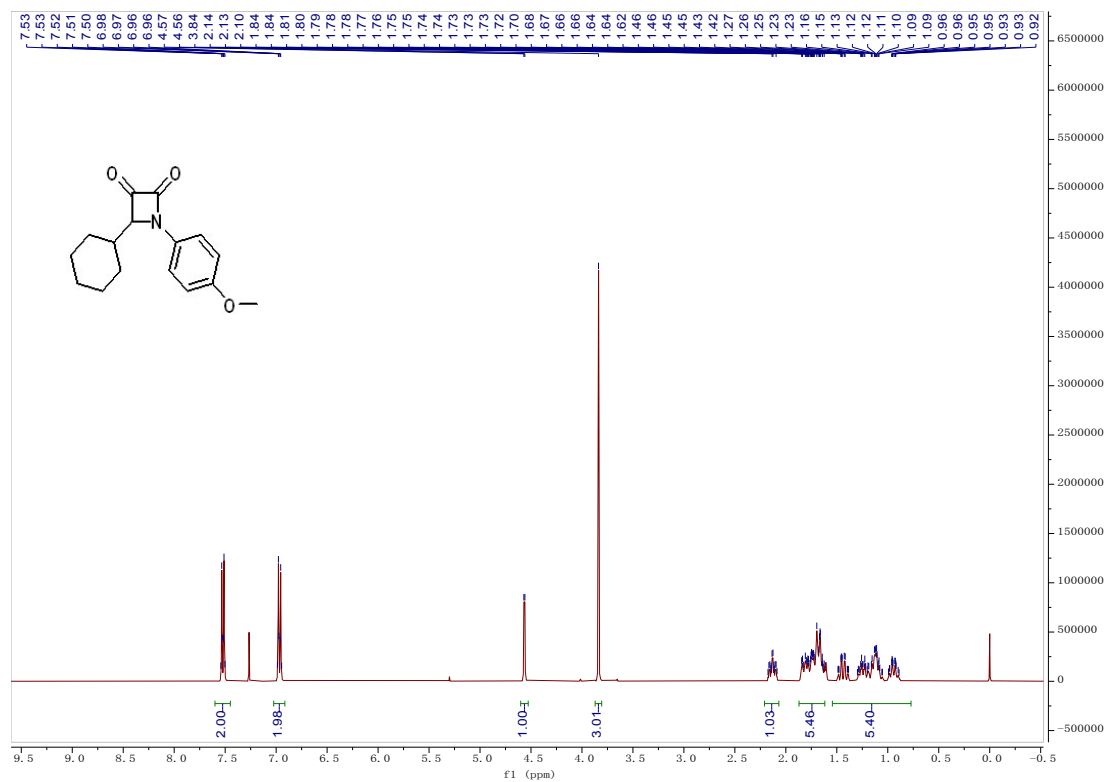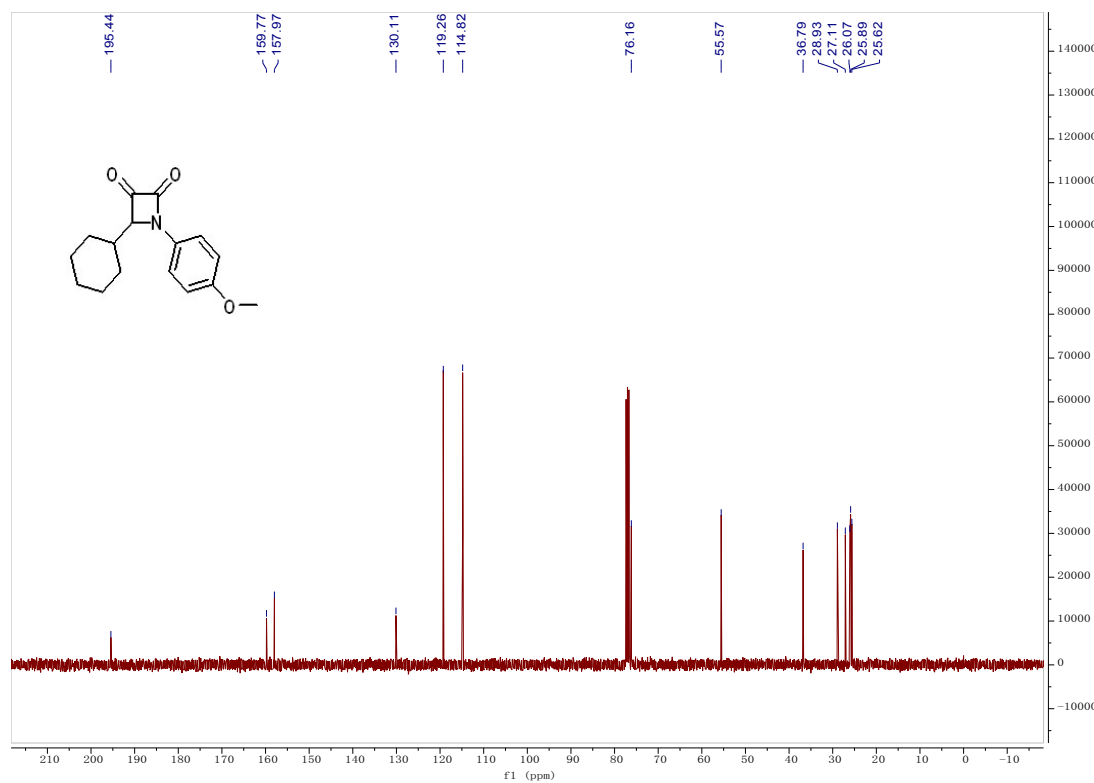

# <sup>1</sup>H NMR and <sup>13</sup>C NMR of 1aa

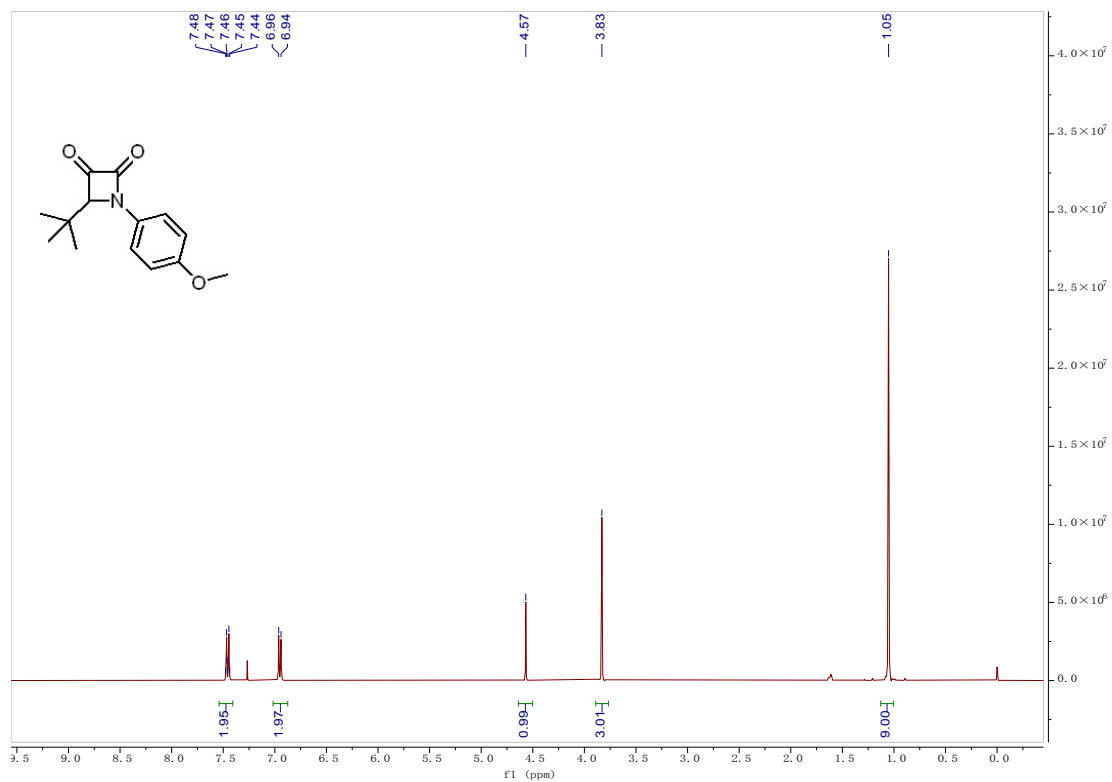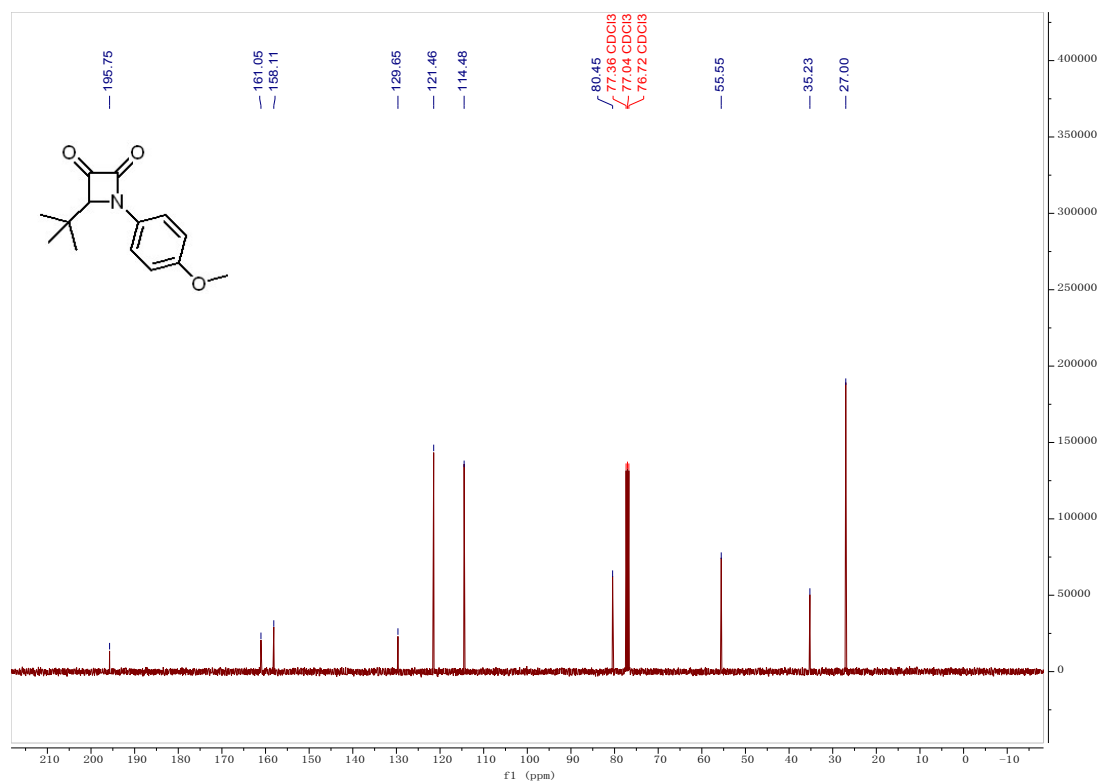

# <sup>1</sup>H NMR and <sup>13</sup>C NMR of 2a

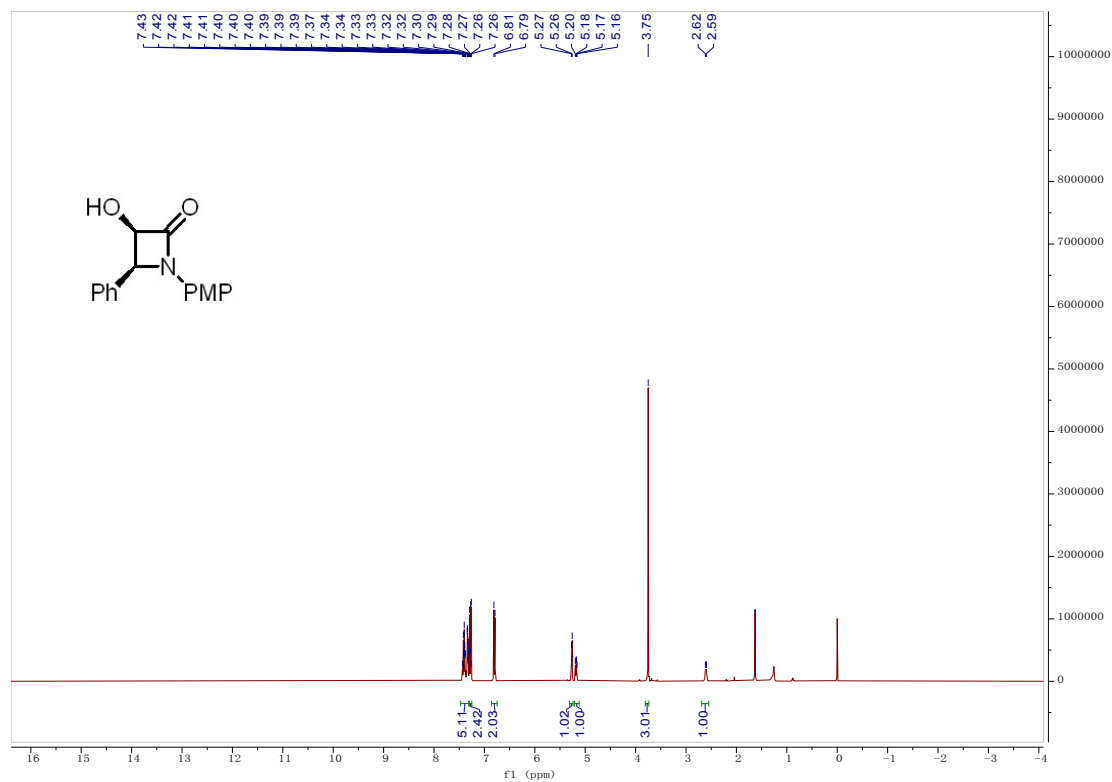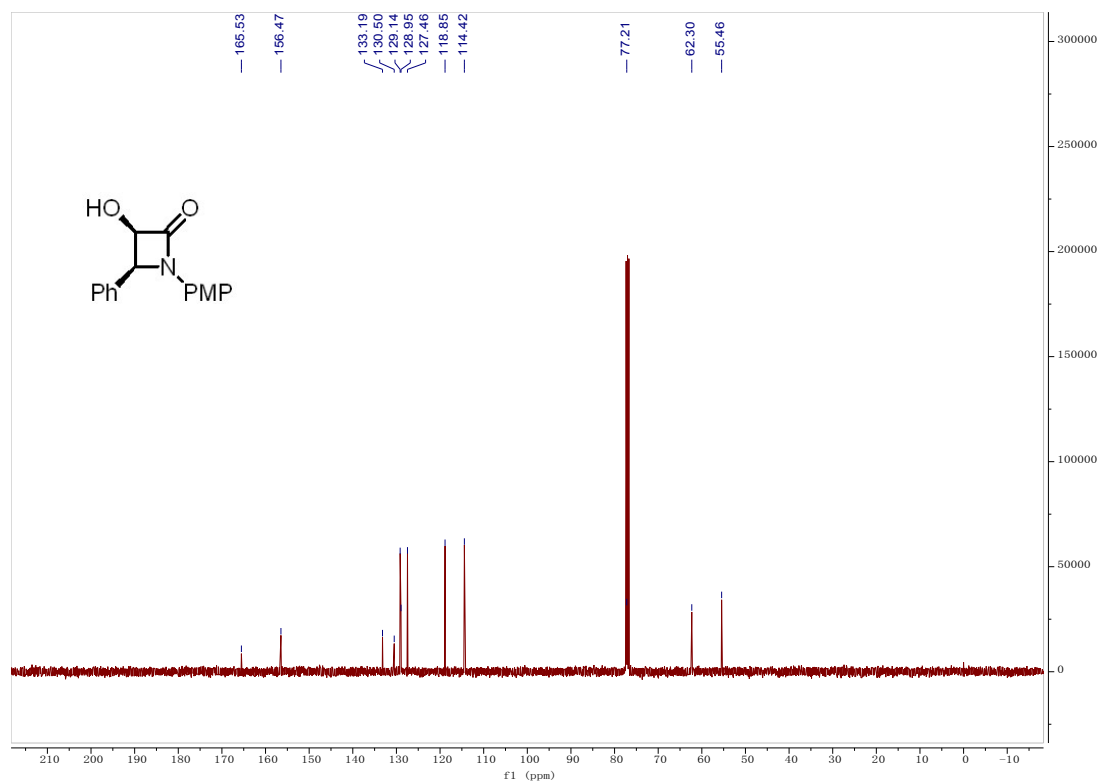

# $^1\text{H}$ NMR and $^{13}\text{C}$ NMR of 2b

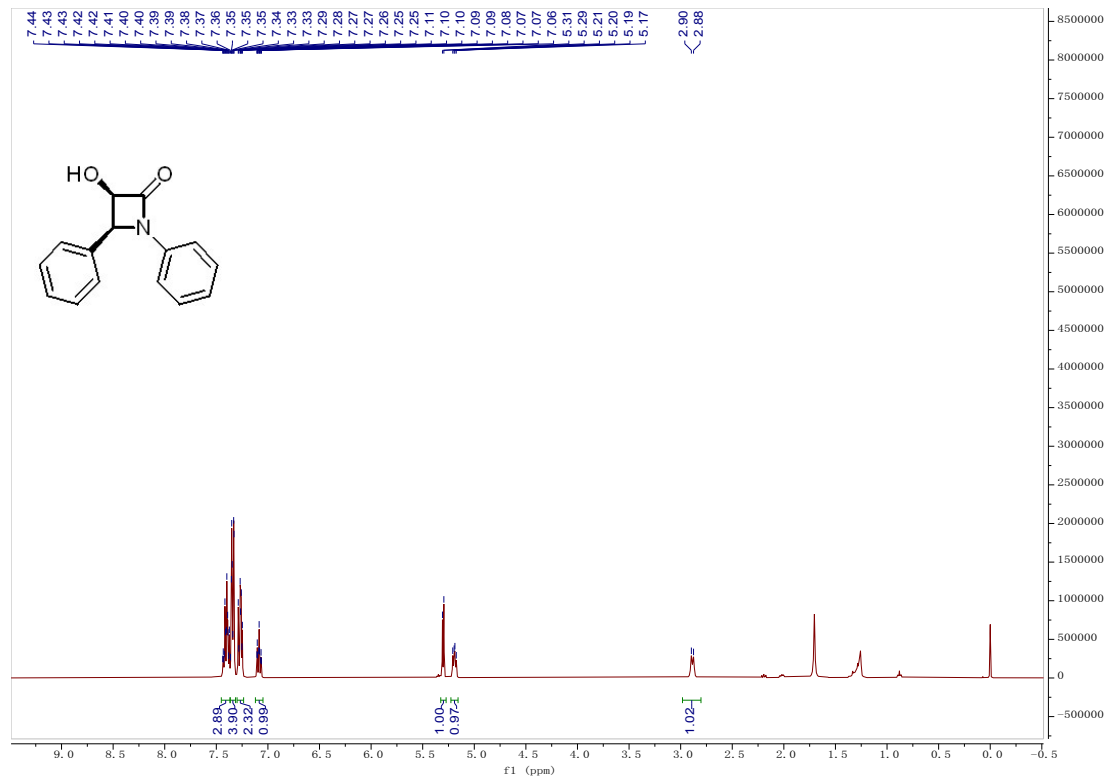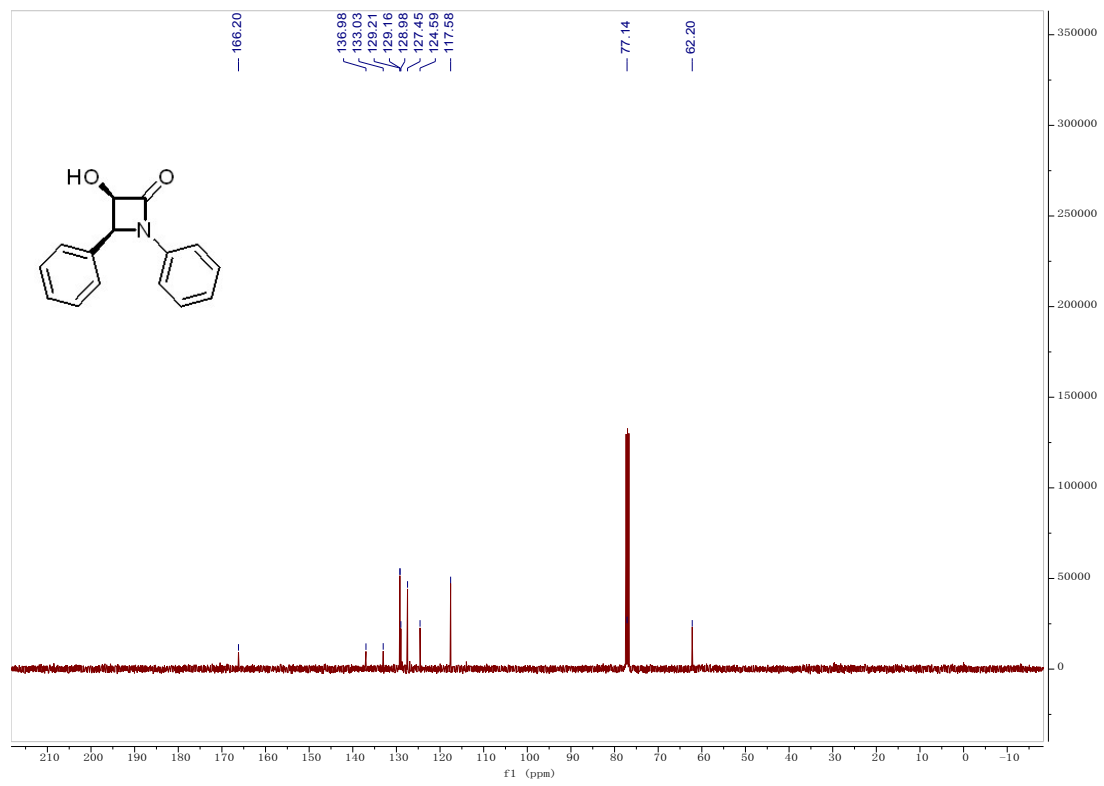

# $^1\text{H}$ NMR and $^{13}\text{C}$ NMR of 2c

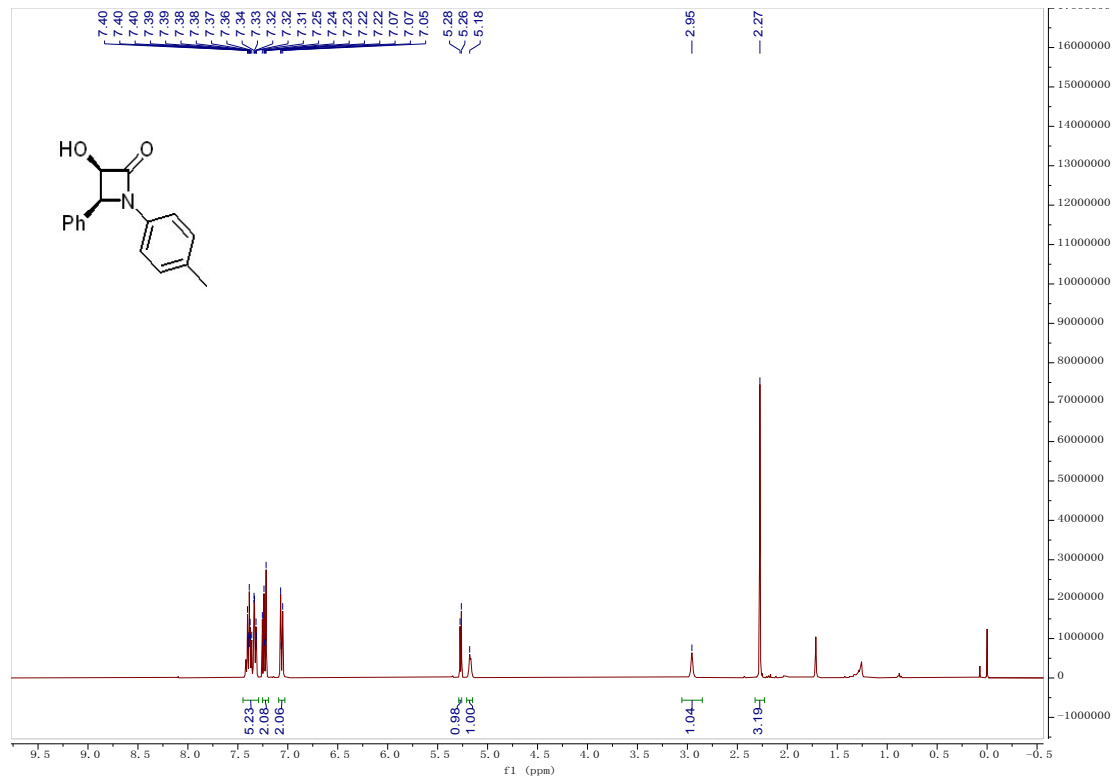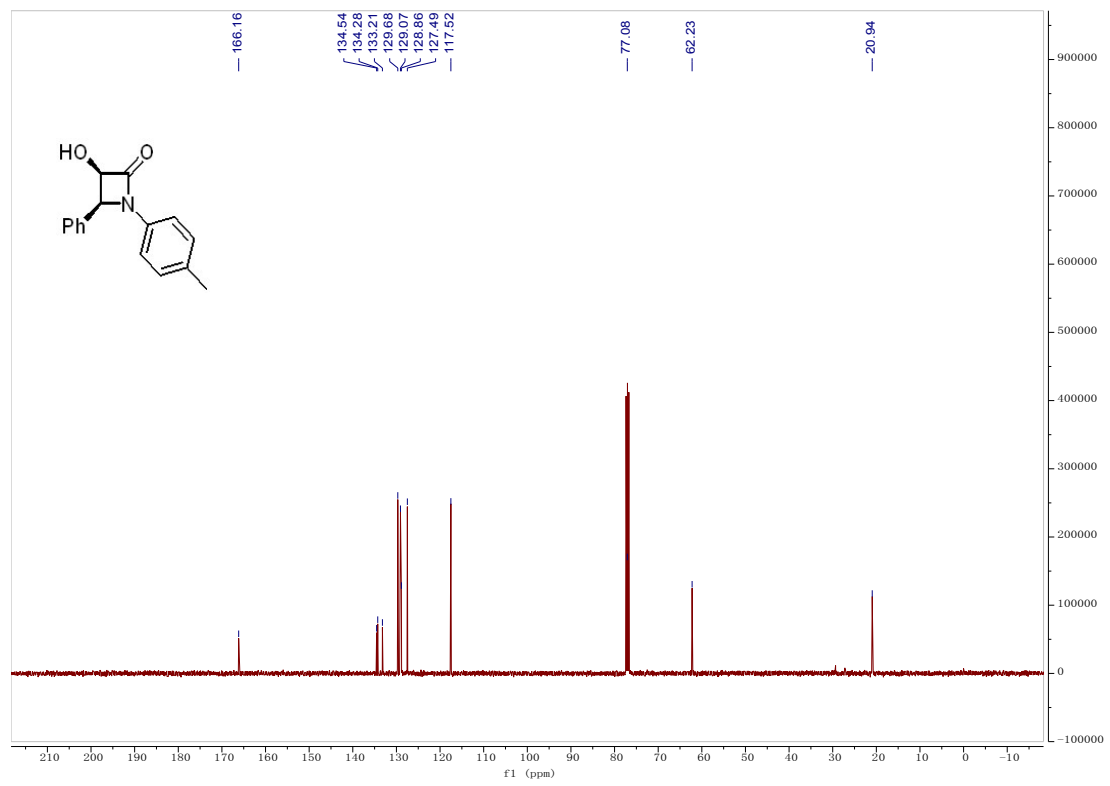

# <sup>1</sup>H NMR and <sup>13</sup>C NMR of 2d

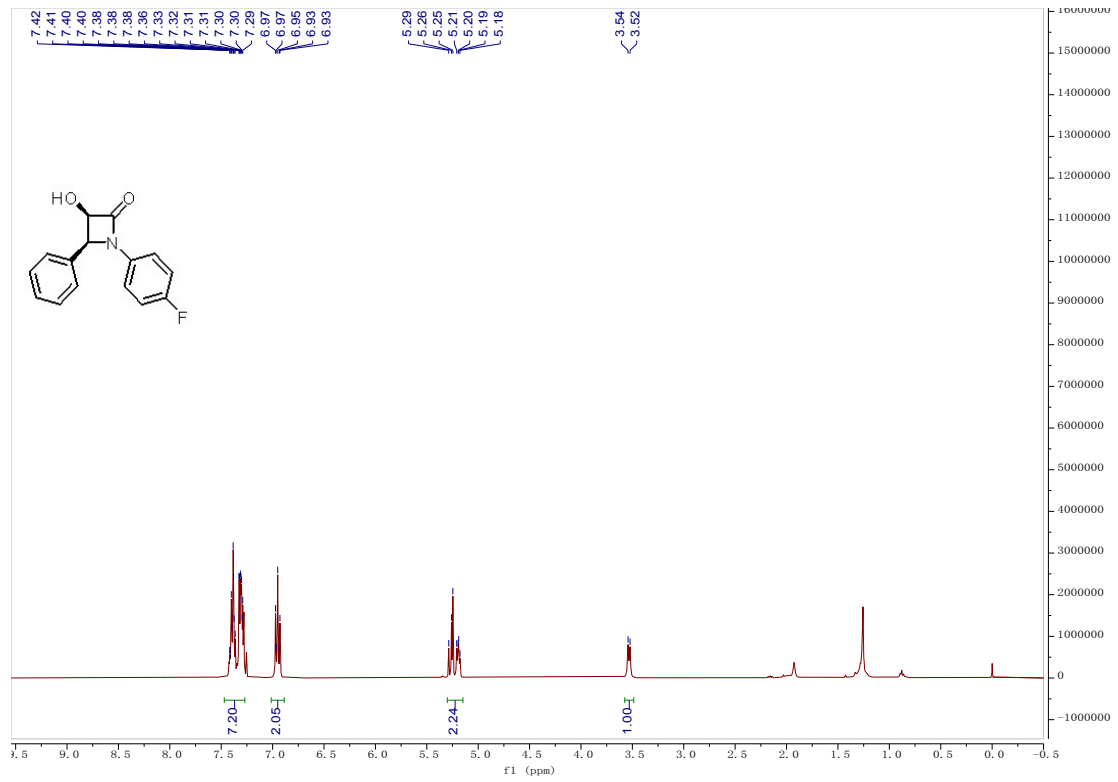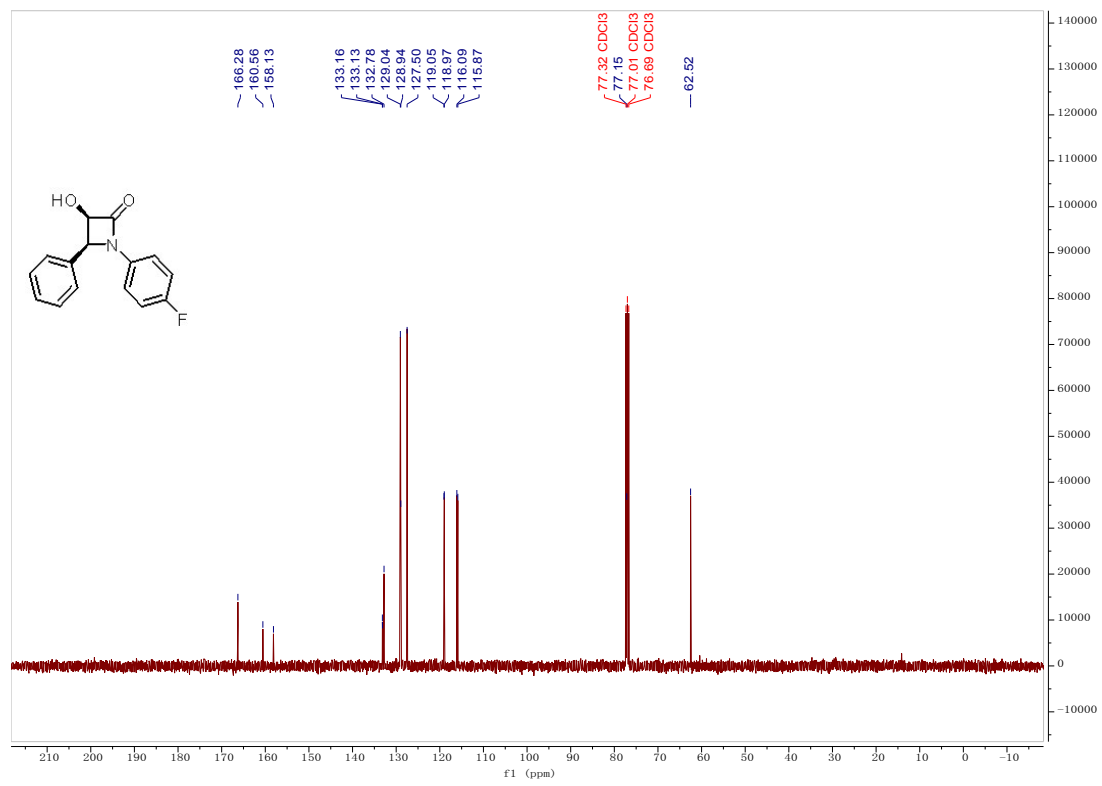



# $^1\text{H}$ NMR and $^{13}\text{C}$ NMR of 2e

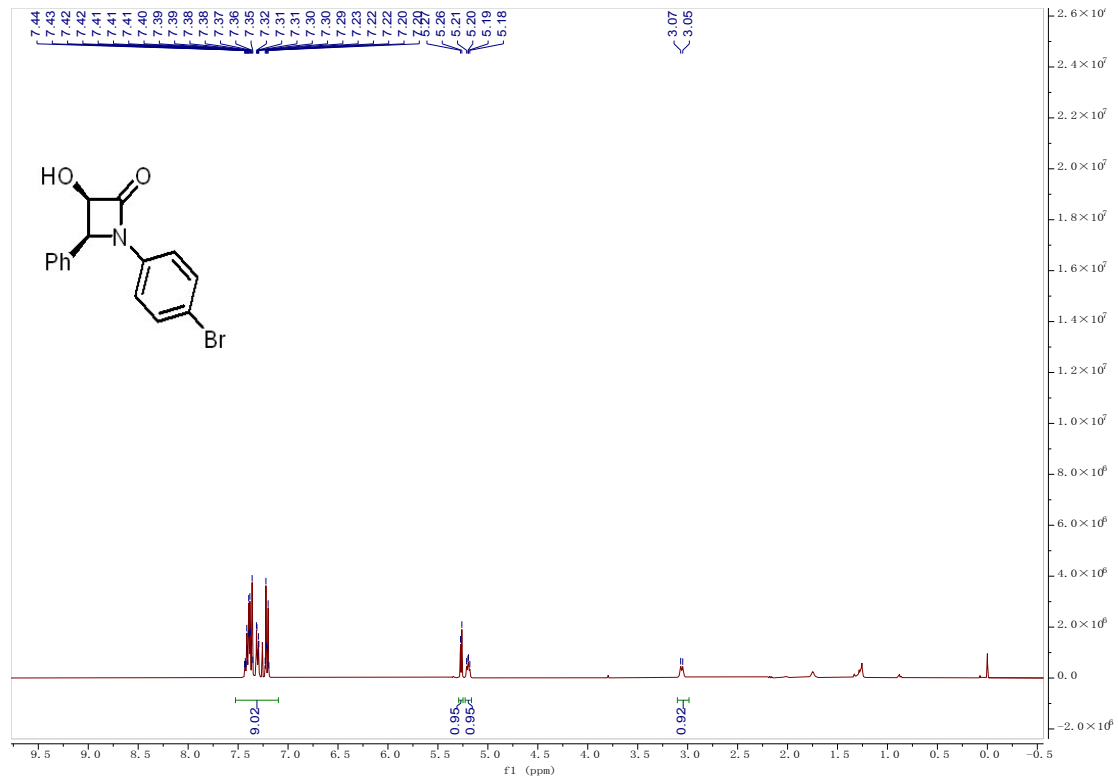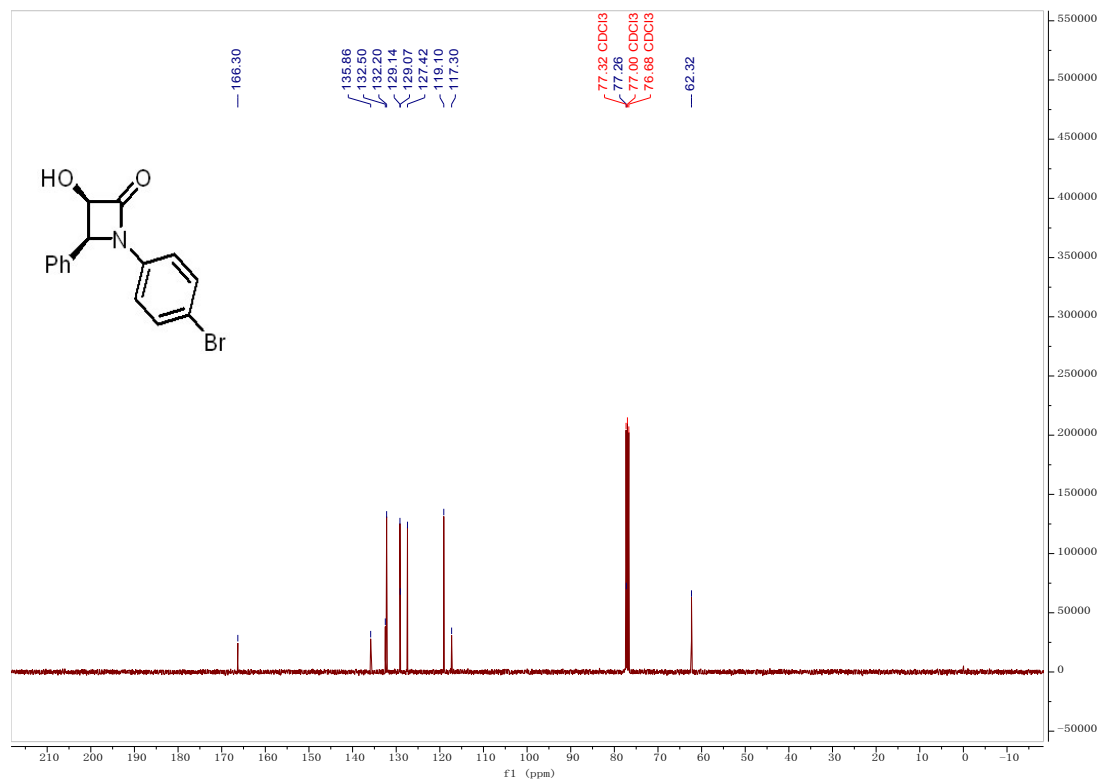

# $^1\text{H}$ NMR and $^{13}\text{C}$ NMR of 2f

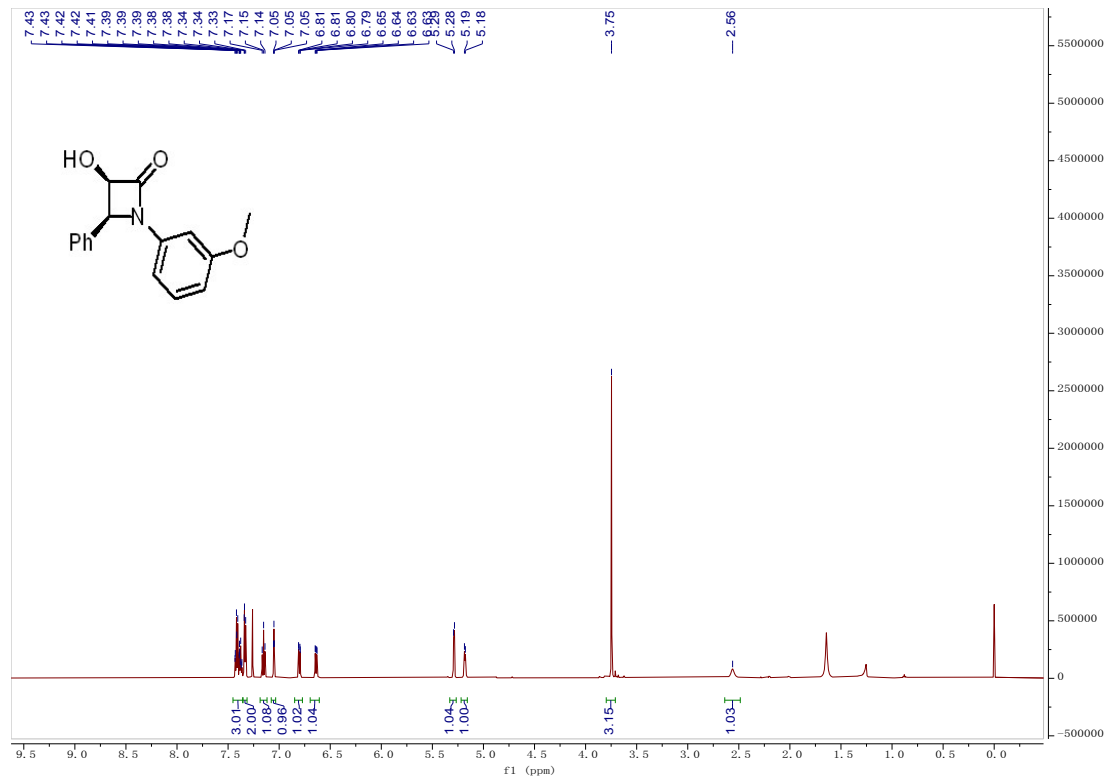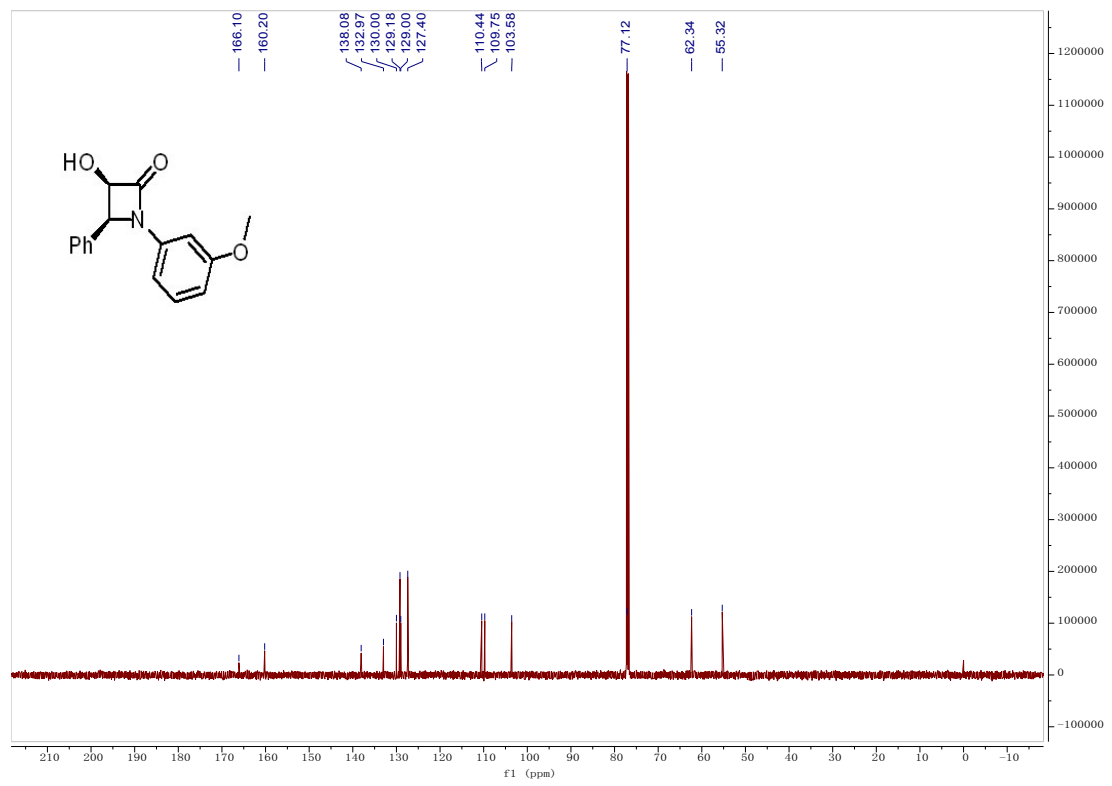

# <sup>1</sup>H NMR and <sup>13</sup>C NMR of 2g

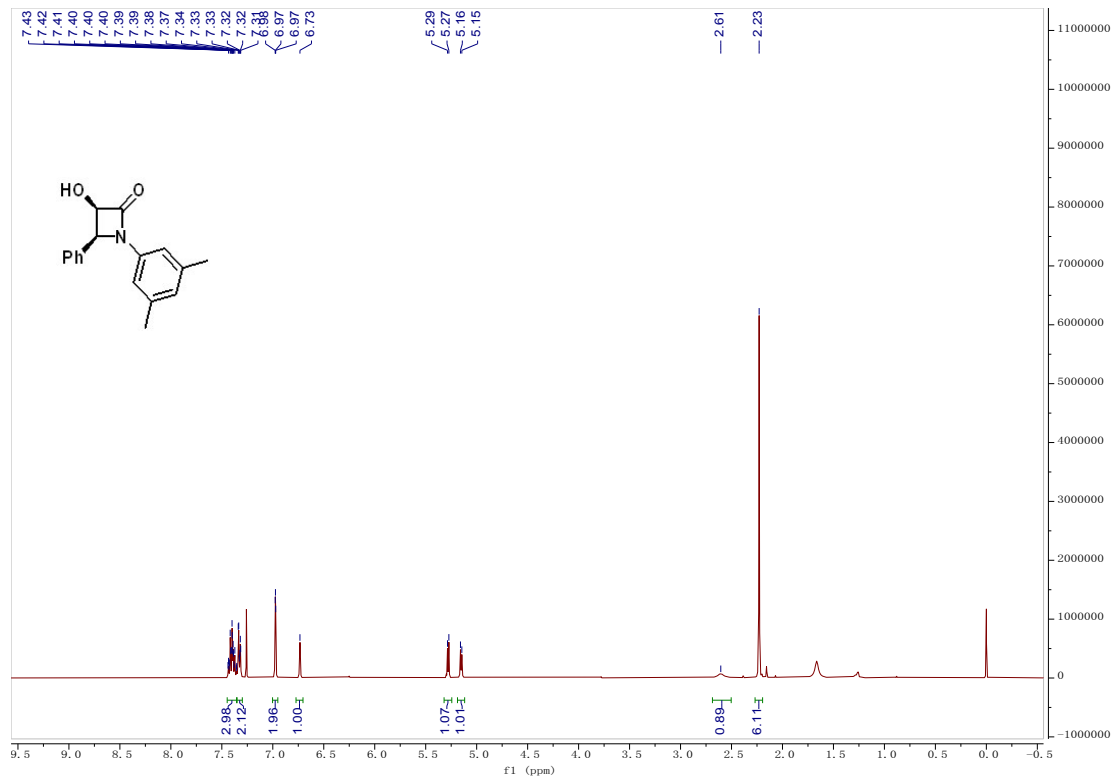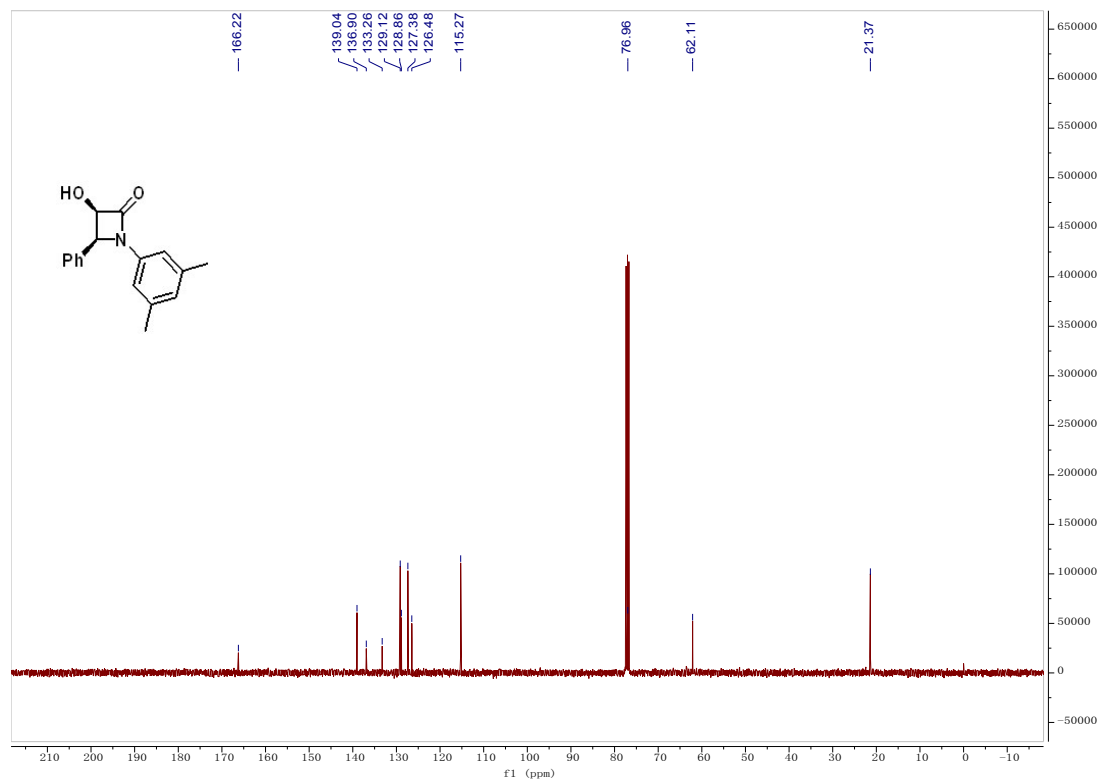

# $^1\text{H}$ NMR and $^{13}\text{C}$ NMR of 2h

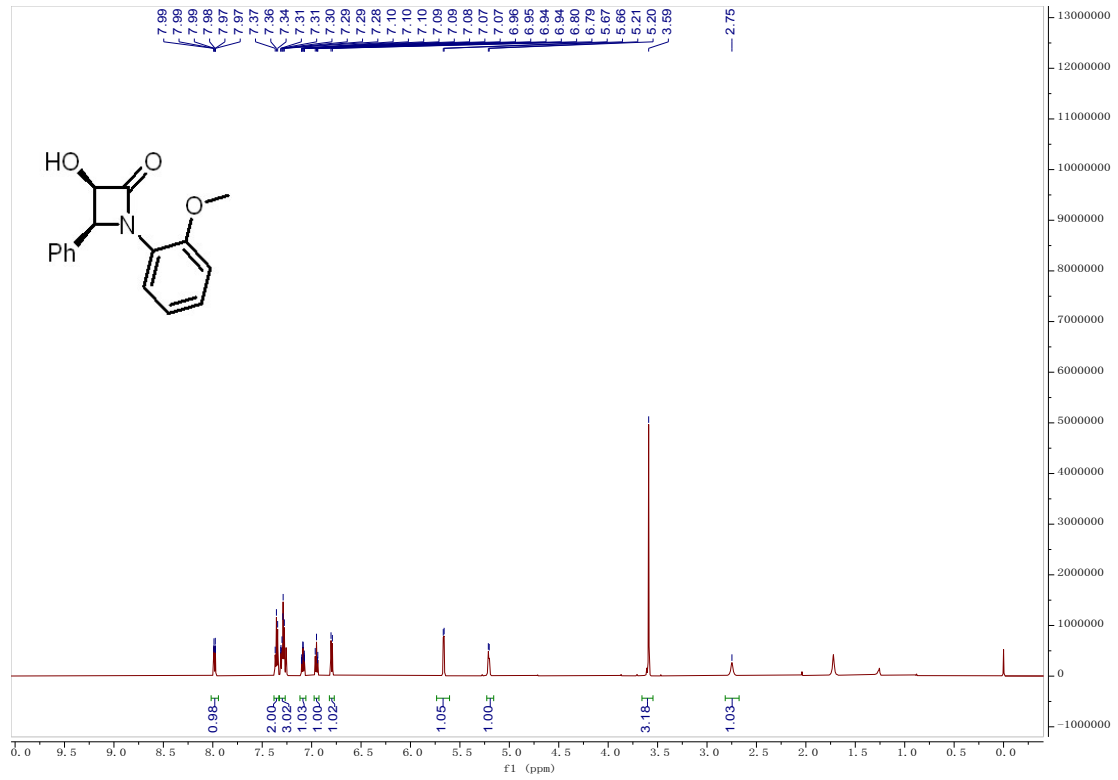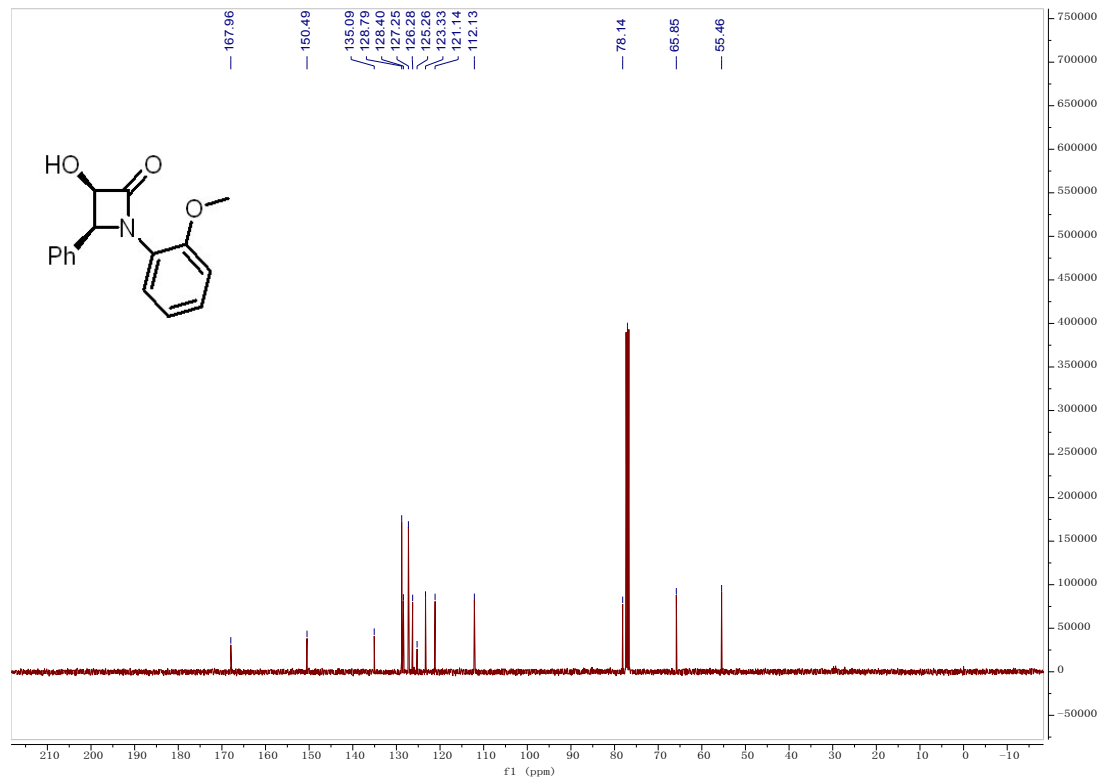

# $^1\text{H}$ NMR and $^{13}\text{C}$ NMR of 2i

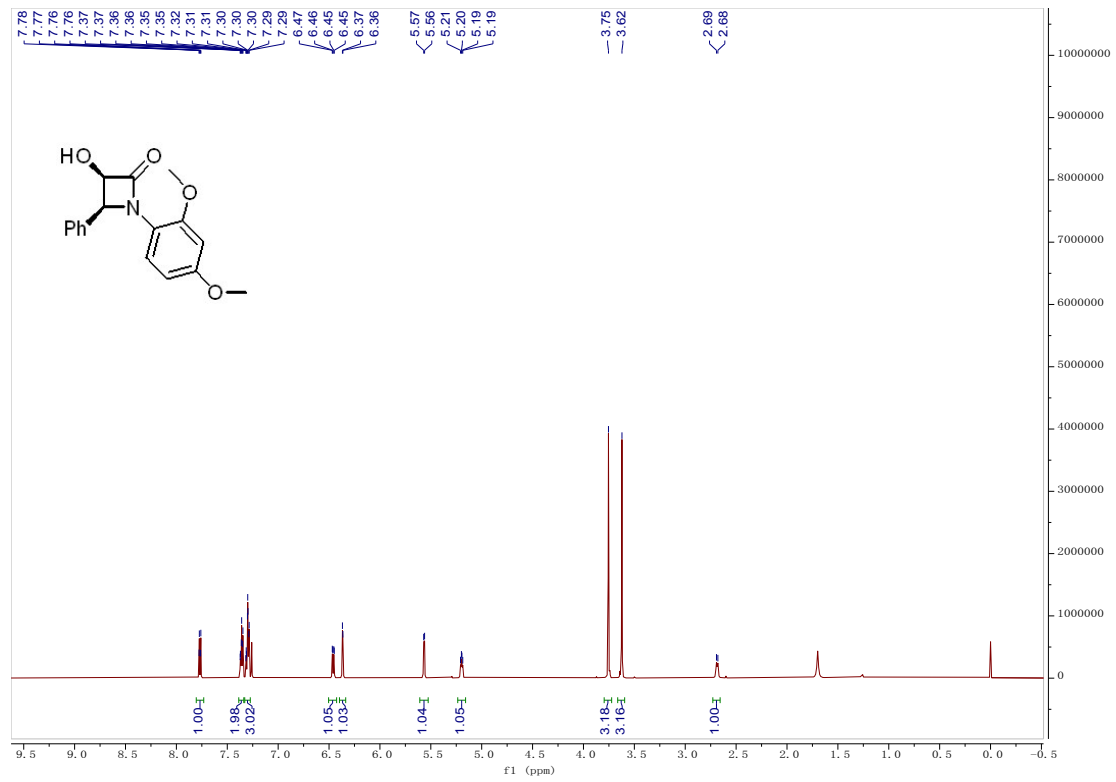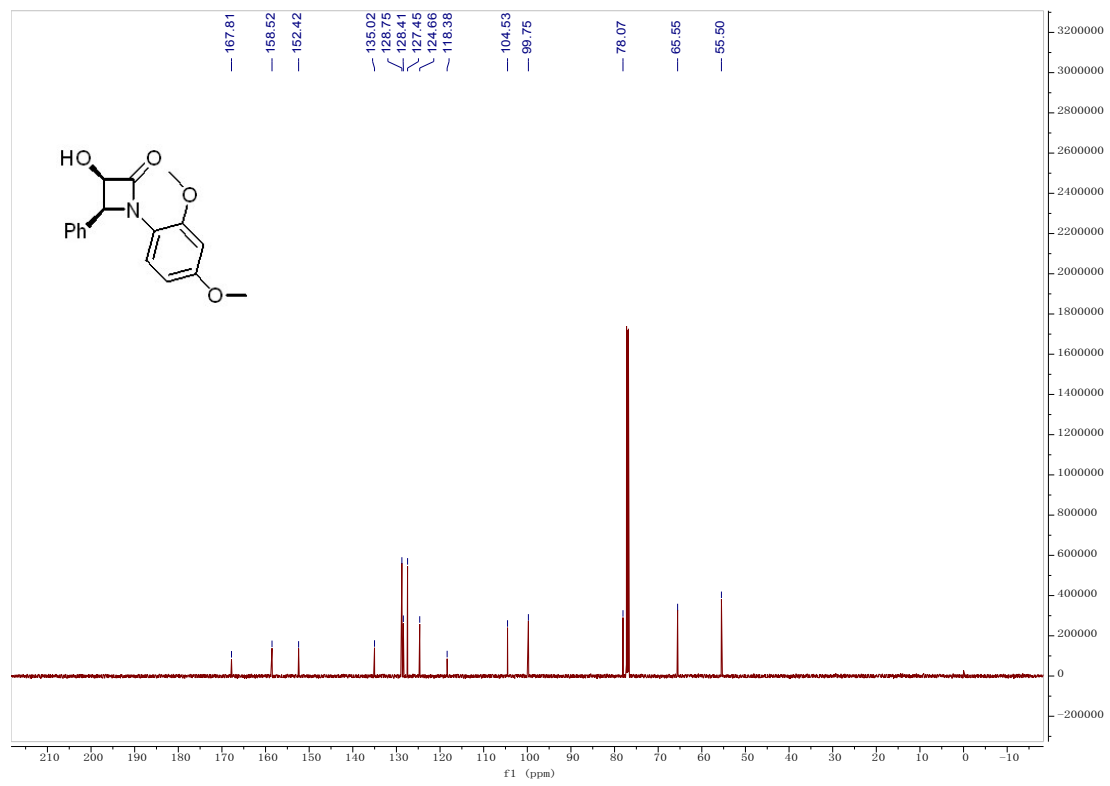

# $^1\text{H}$ NMR and $^{13}\text{C}$ NMR of 2j

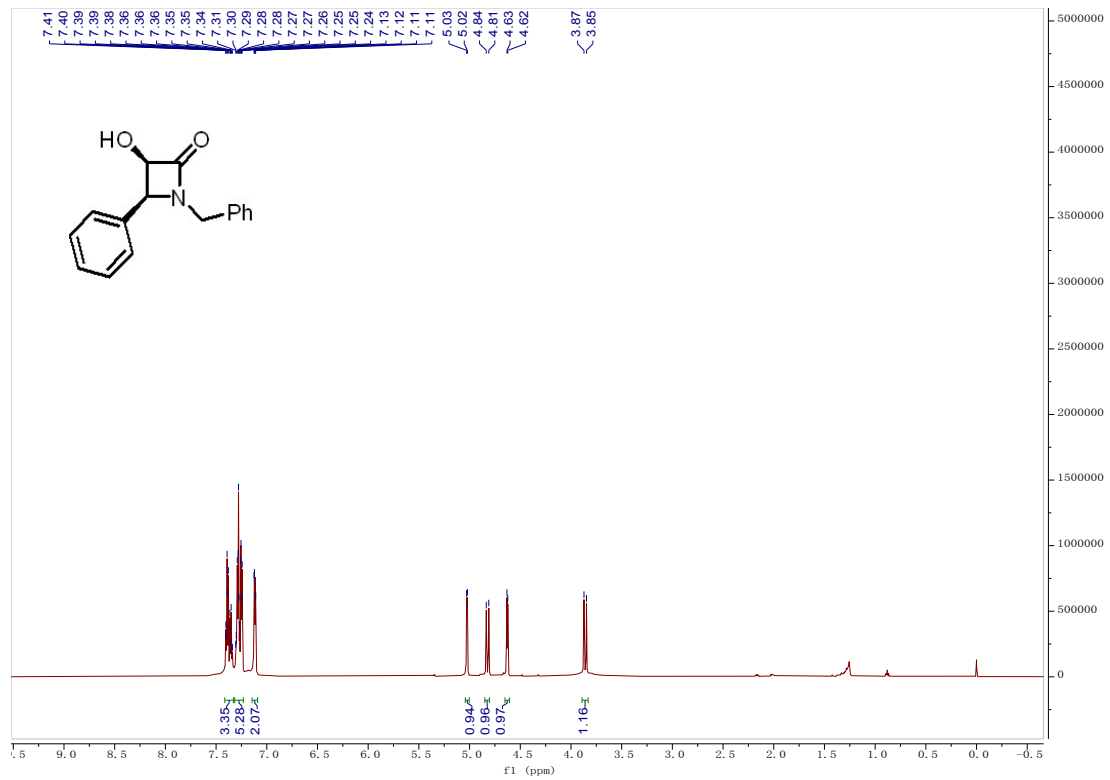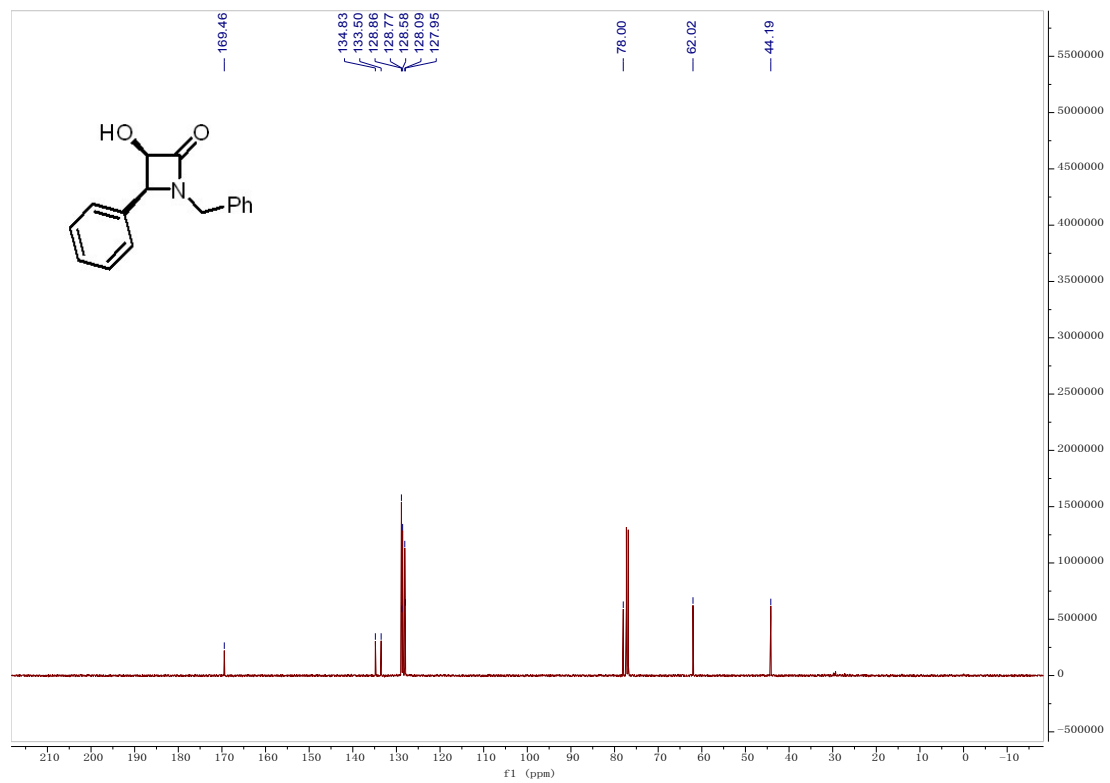

# $^1\text{H}$ NMR and $^{13}\text{C}$ NMR of 2k

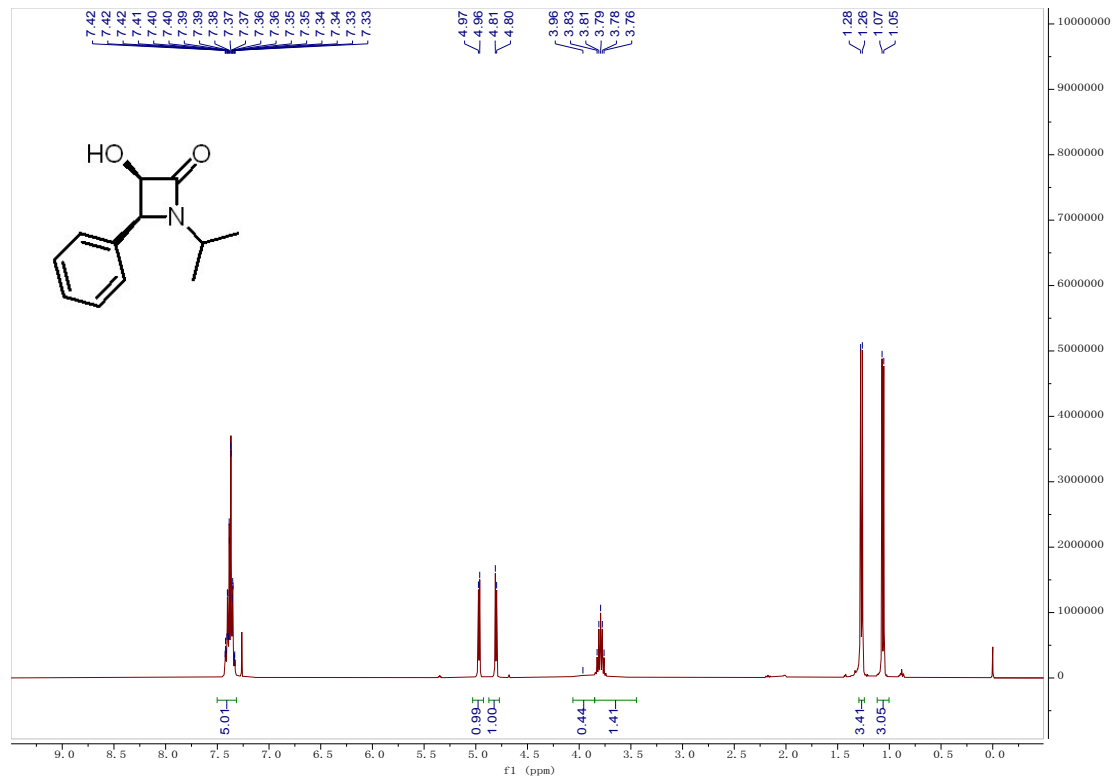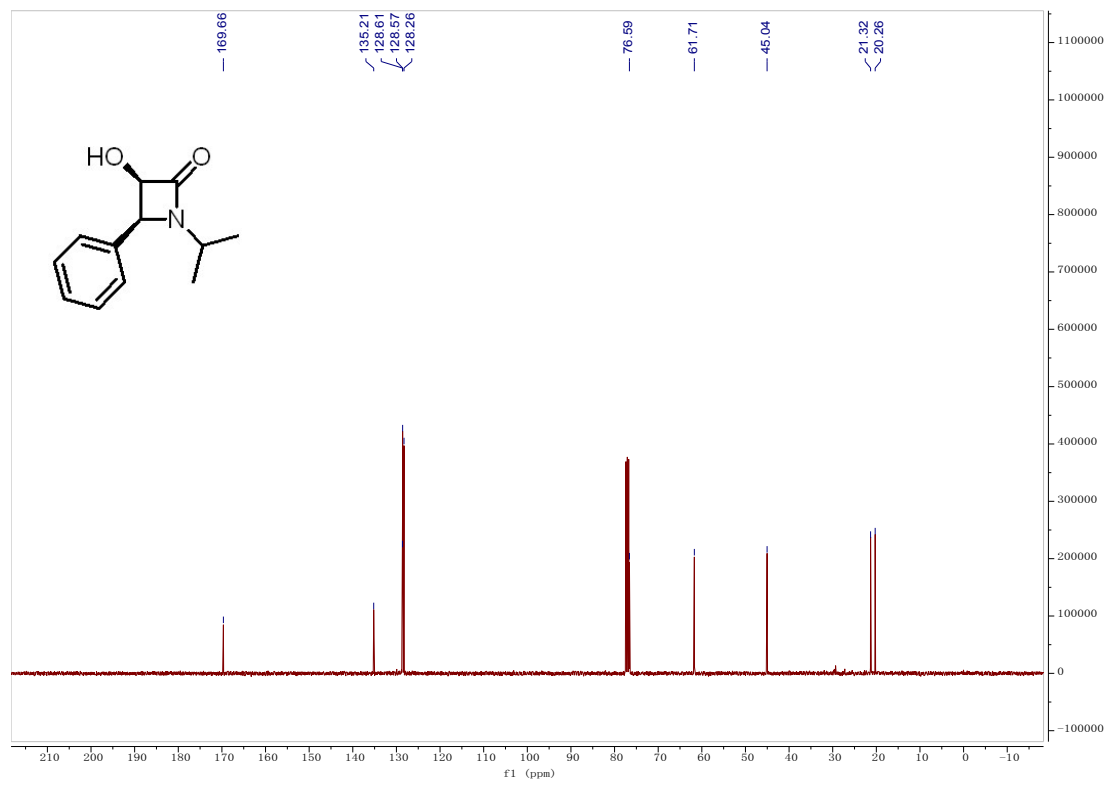

# <sup>1</sup>H NMR and <sup>13</sup>C NMR of 2l

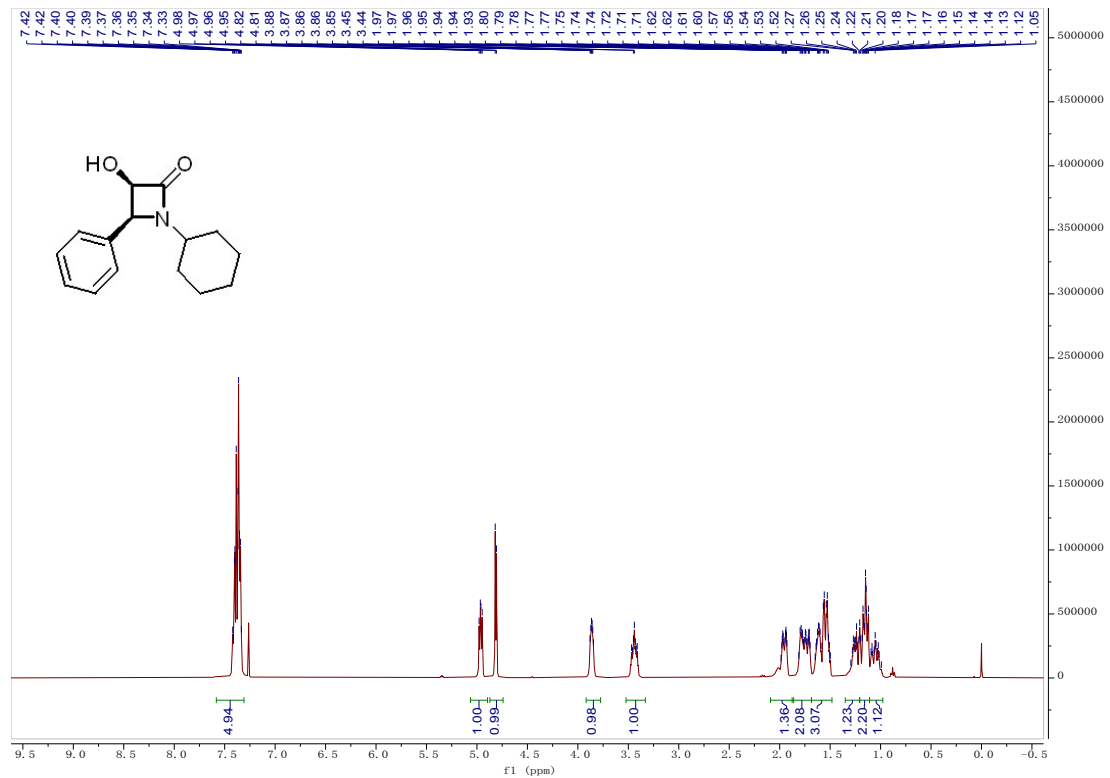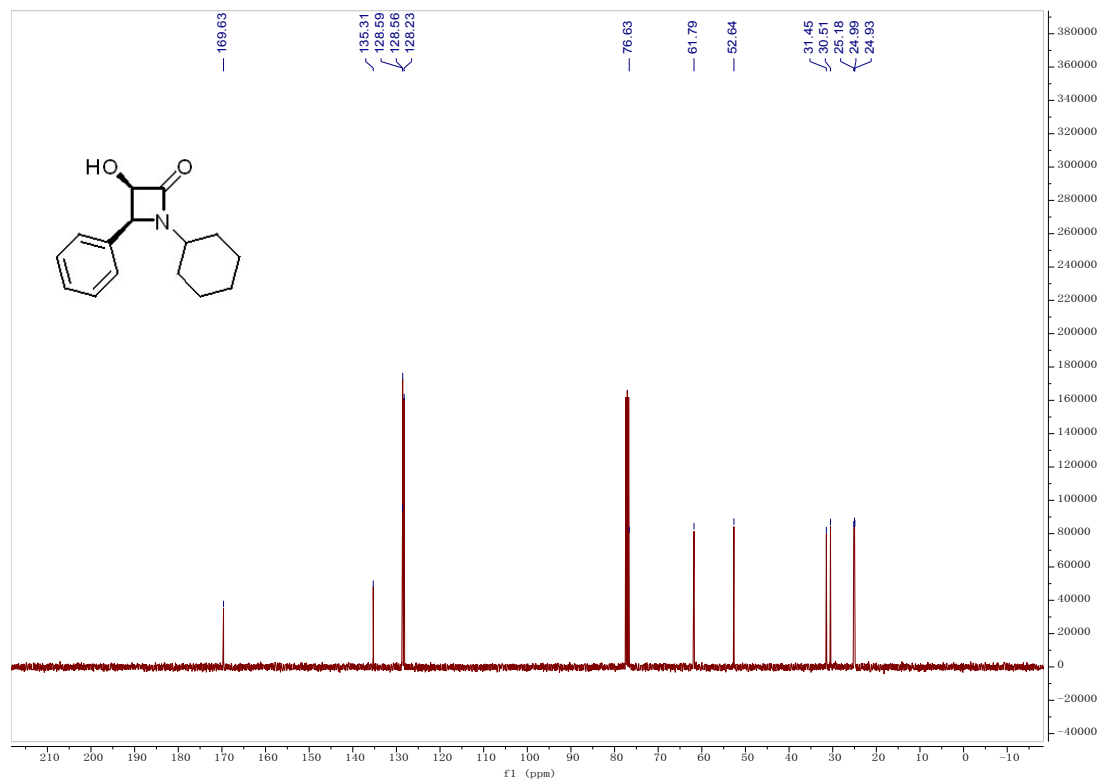



# $^1\text{H}$ NMR and $^{13}\text{C}$ NMR of 2m

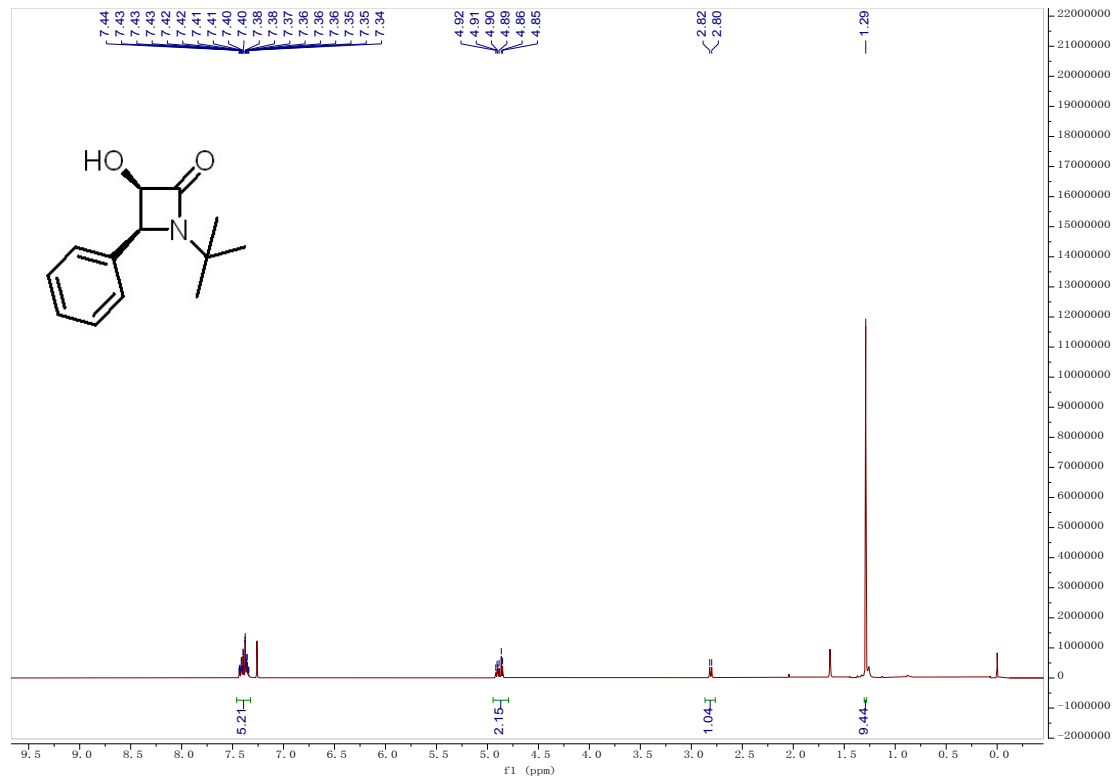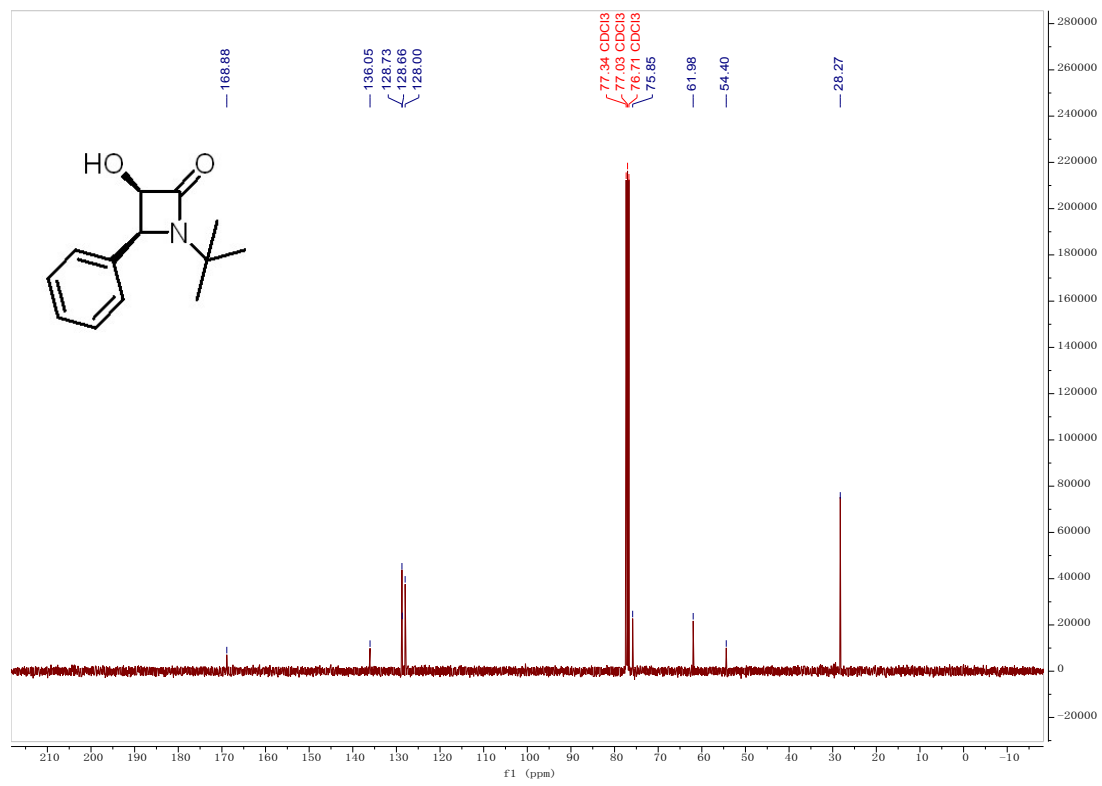

# <sup>1</sup>H NMR and <sup>13</sup>C NMR of 2n

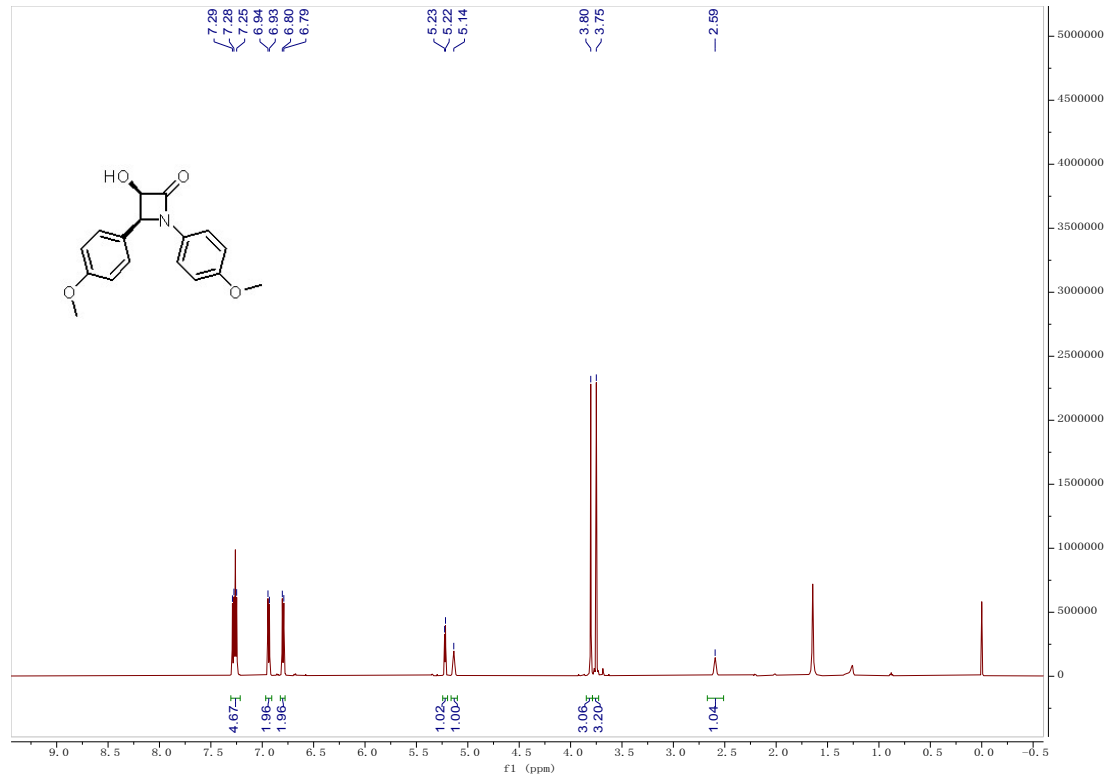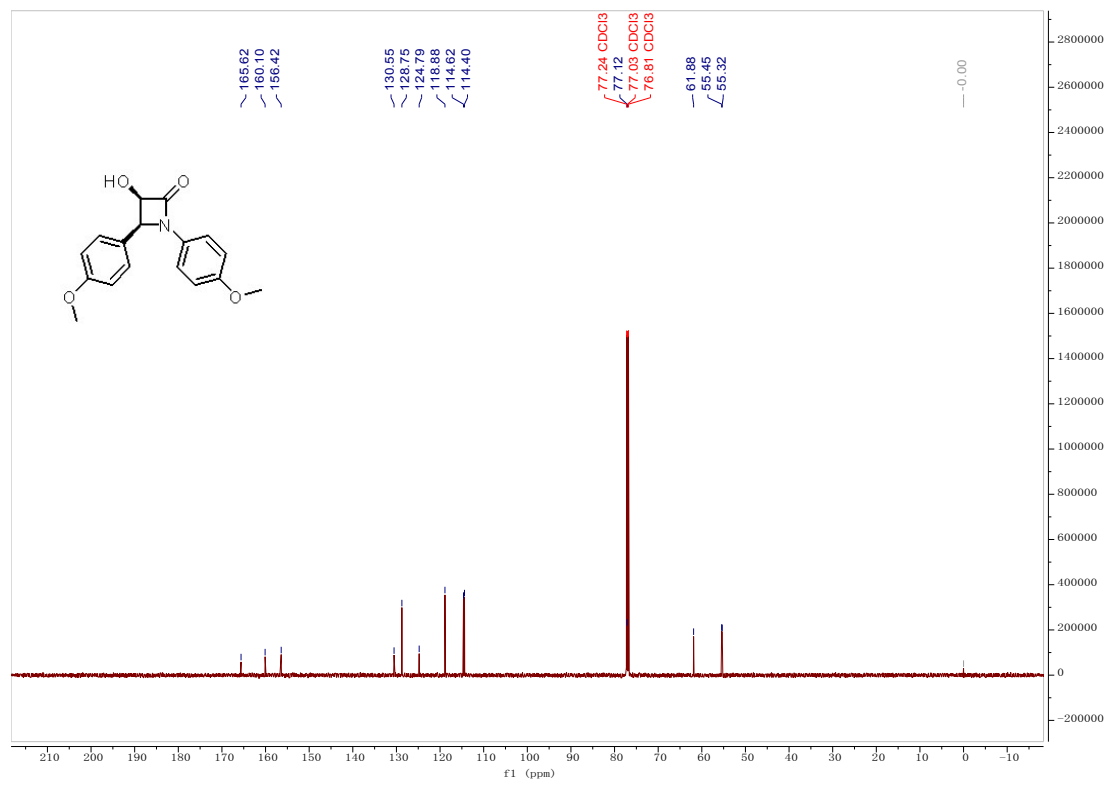

# <sup>1</sup>H NMR and <sup>13</sup>C NMR of 2o

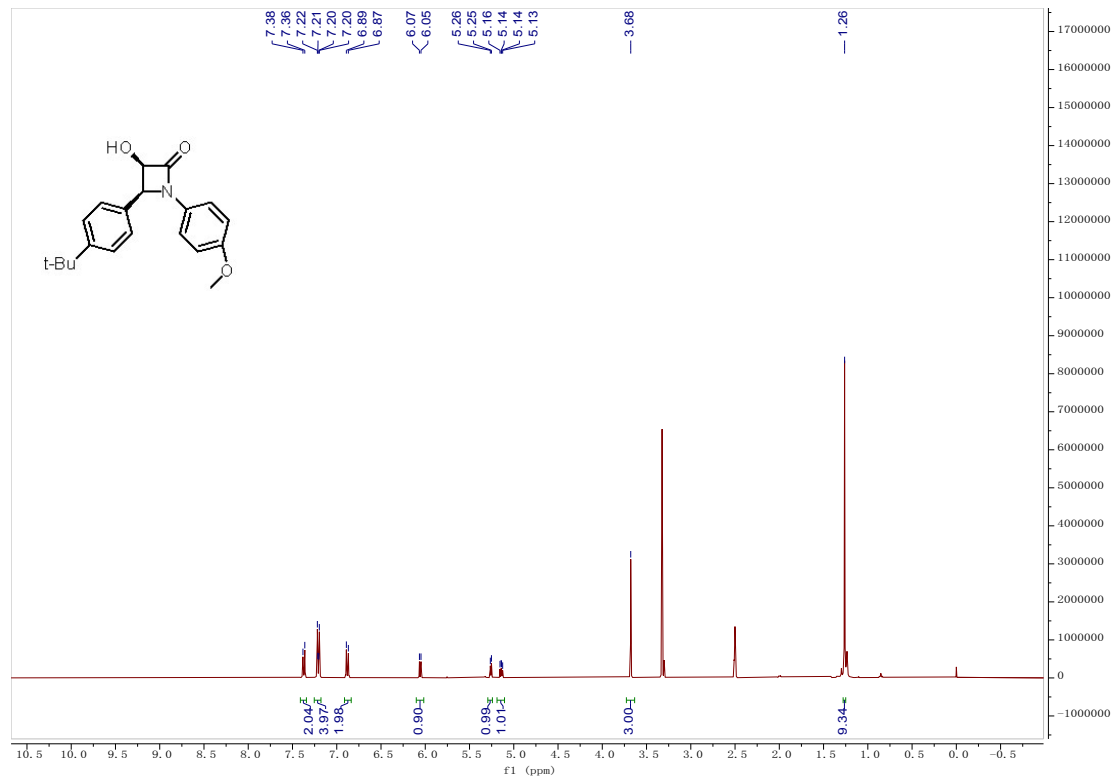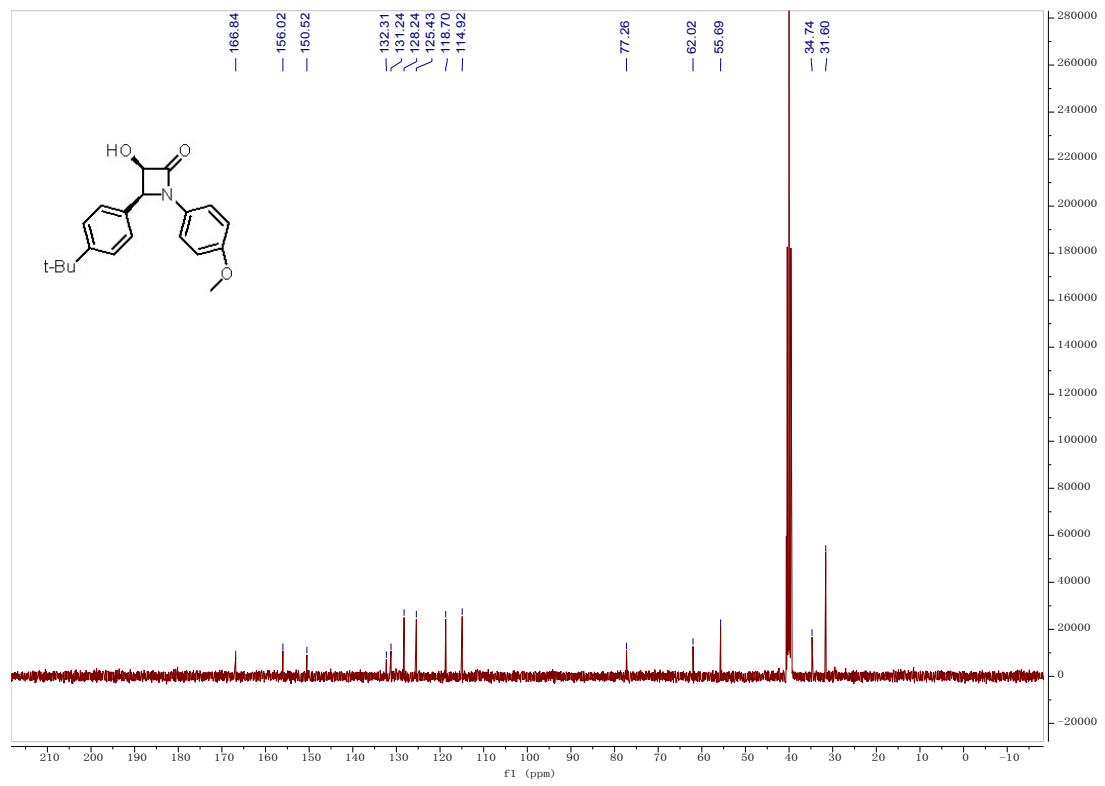

# <sup>1</sup>H NMR and <sup>13</sup>C NMR of 2p

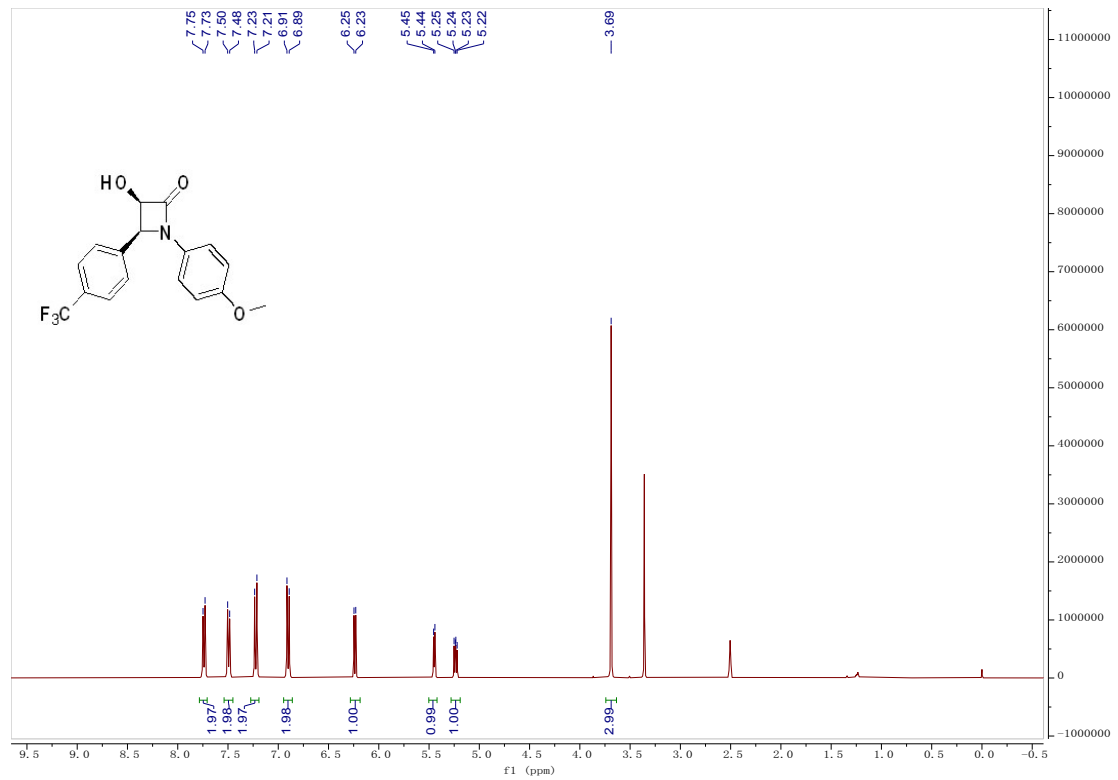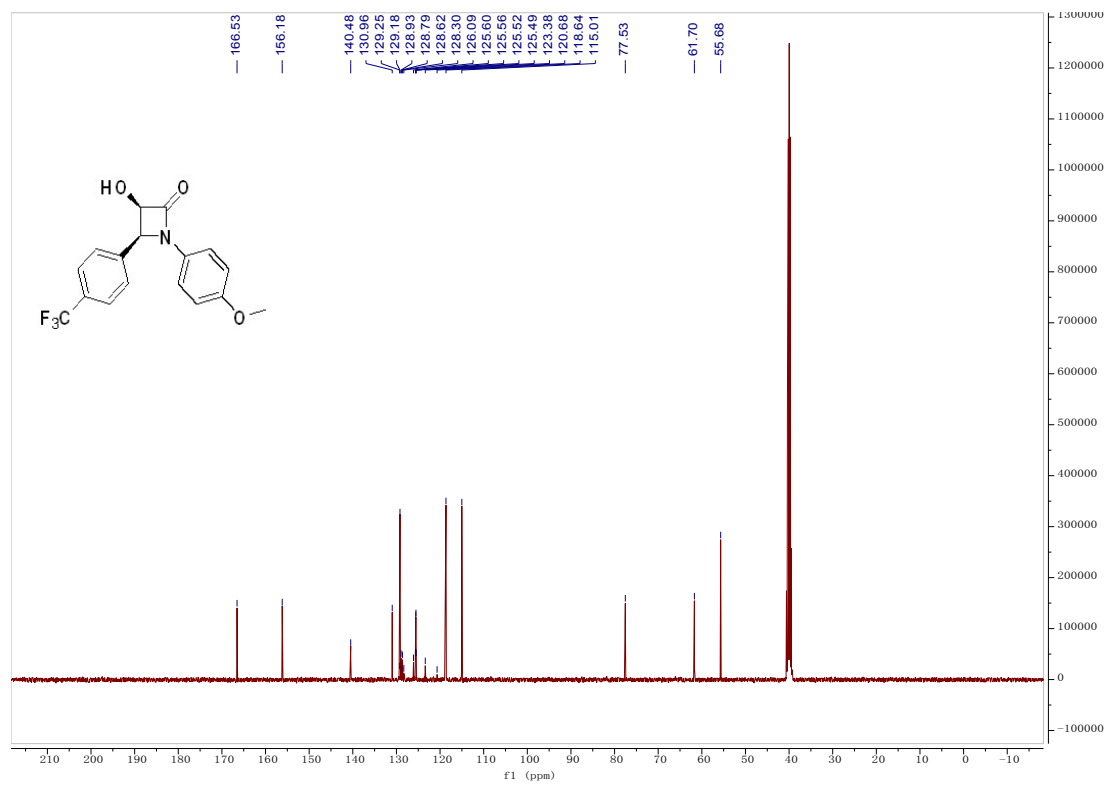

# $^1\text{H}$ NMR and $^{13}\text{C}$ NMR of 2q

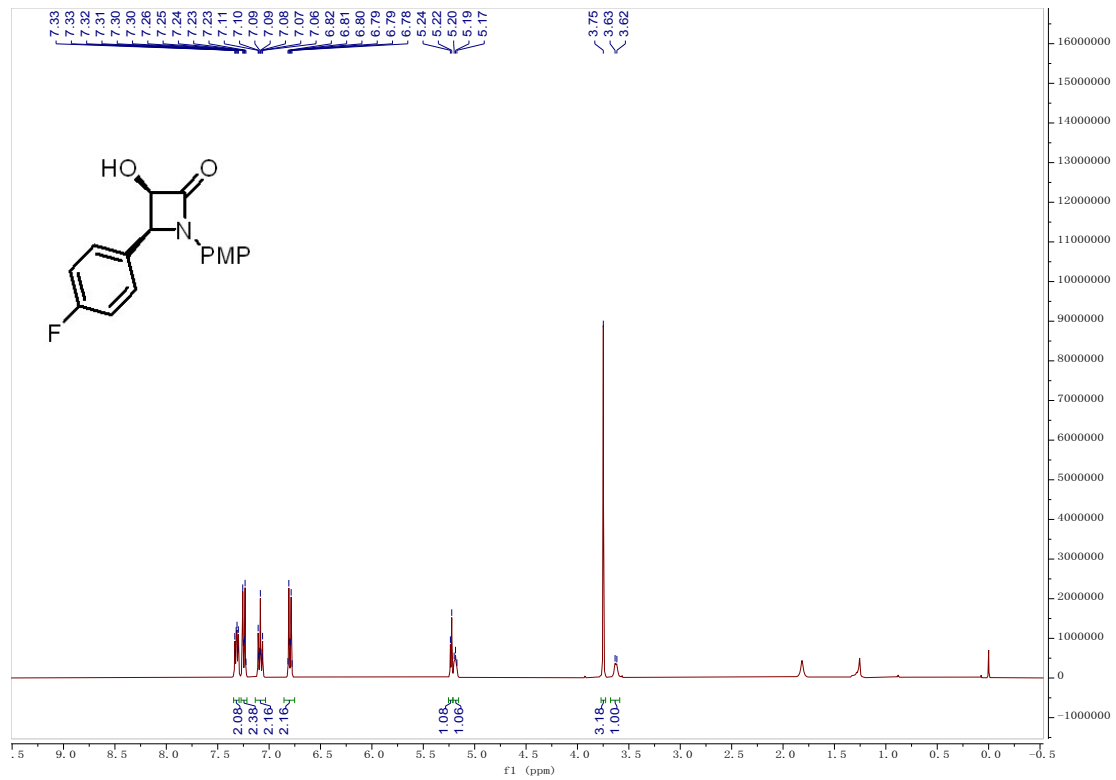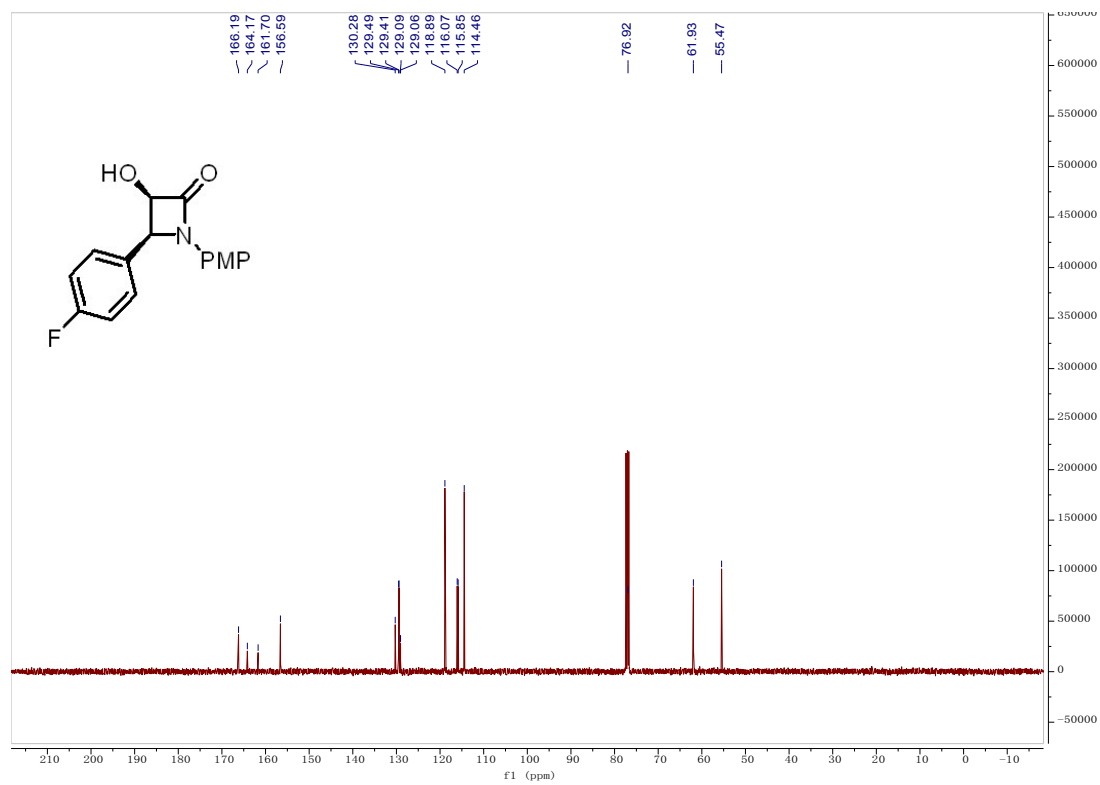

# <sup>1</sup>H NMR and <sup>13</sup>C NMR of 2r

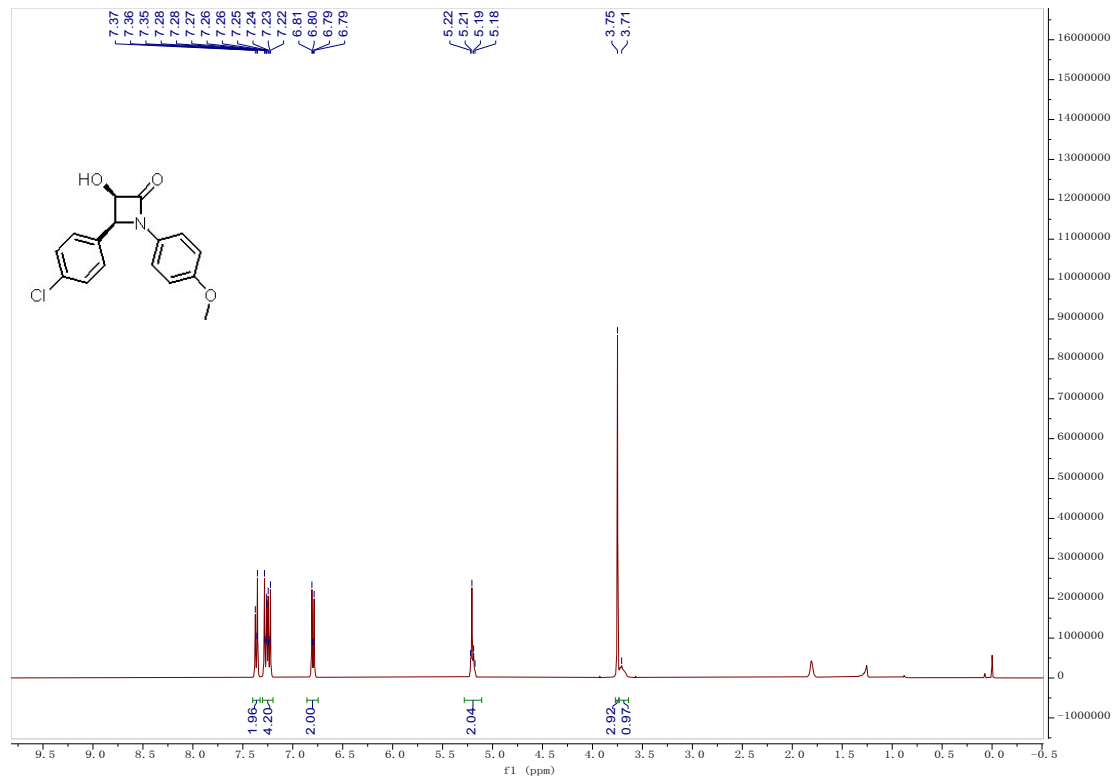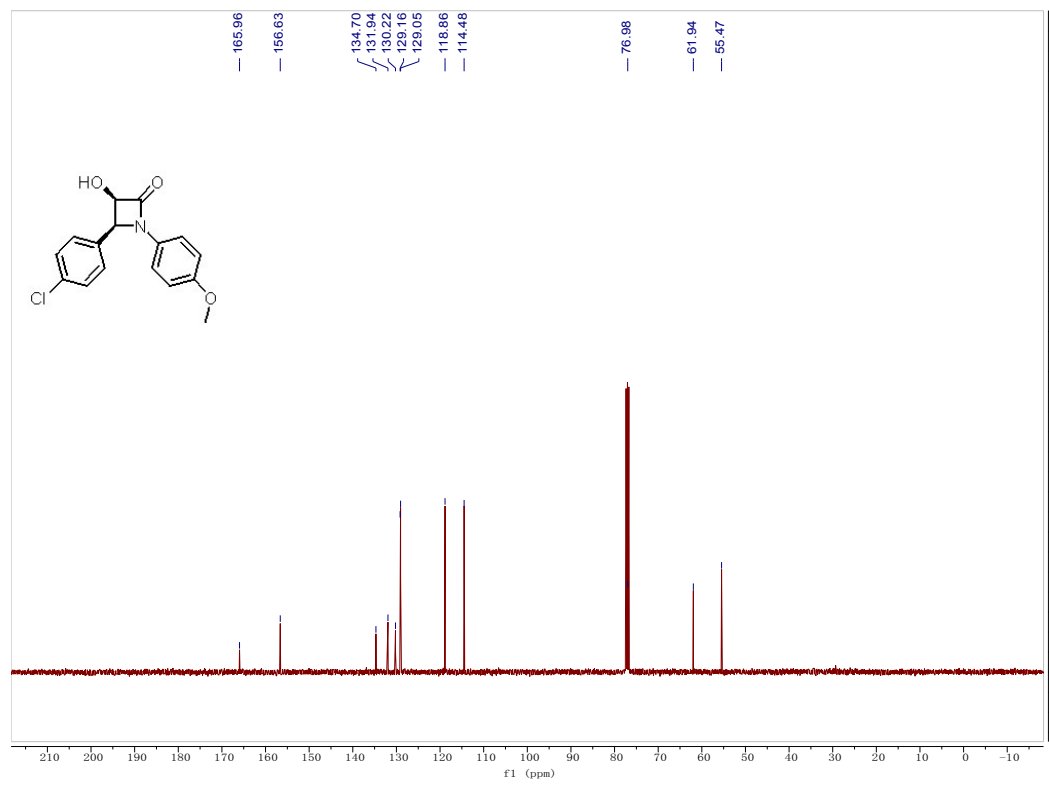

# $^1\text{H}$ NMR and $^{13}\text{C}$ NMR of 2s

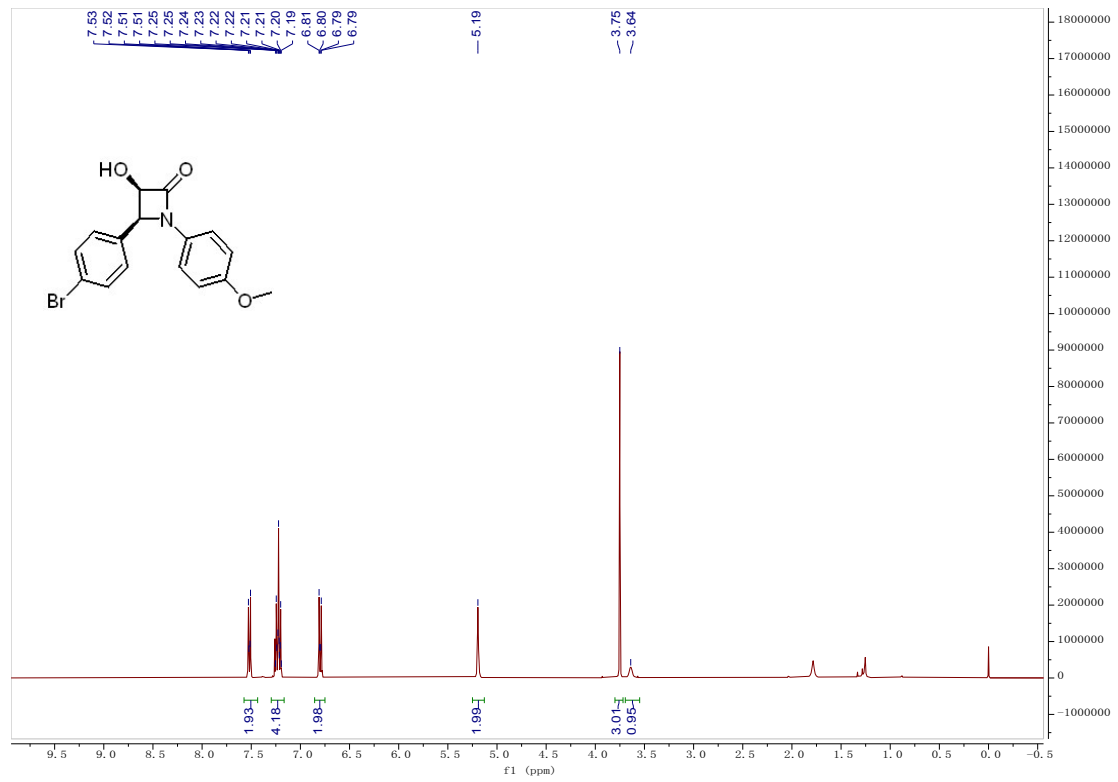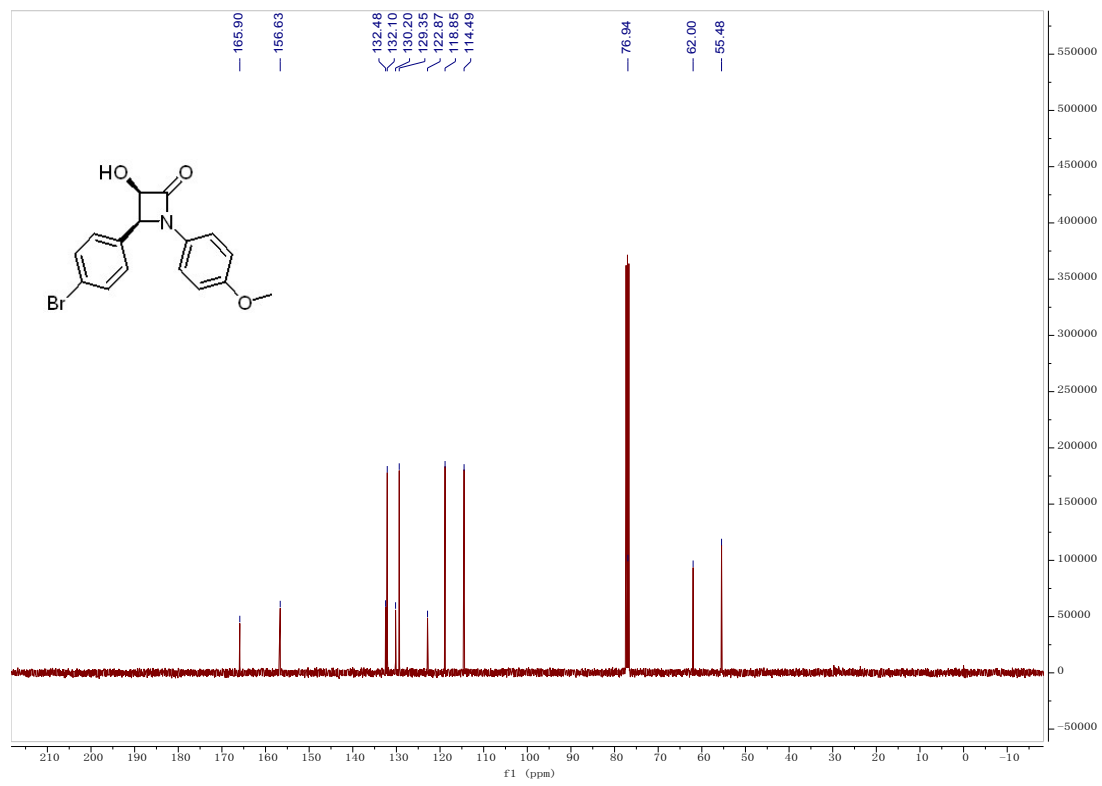

# <sup>1</sup>H NMR and <sup>13</sup>C NMR of 2t

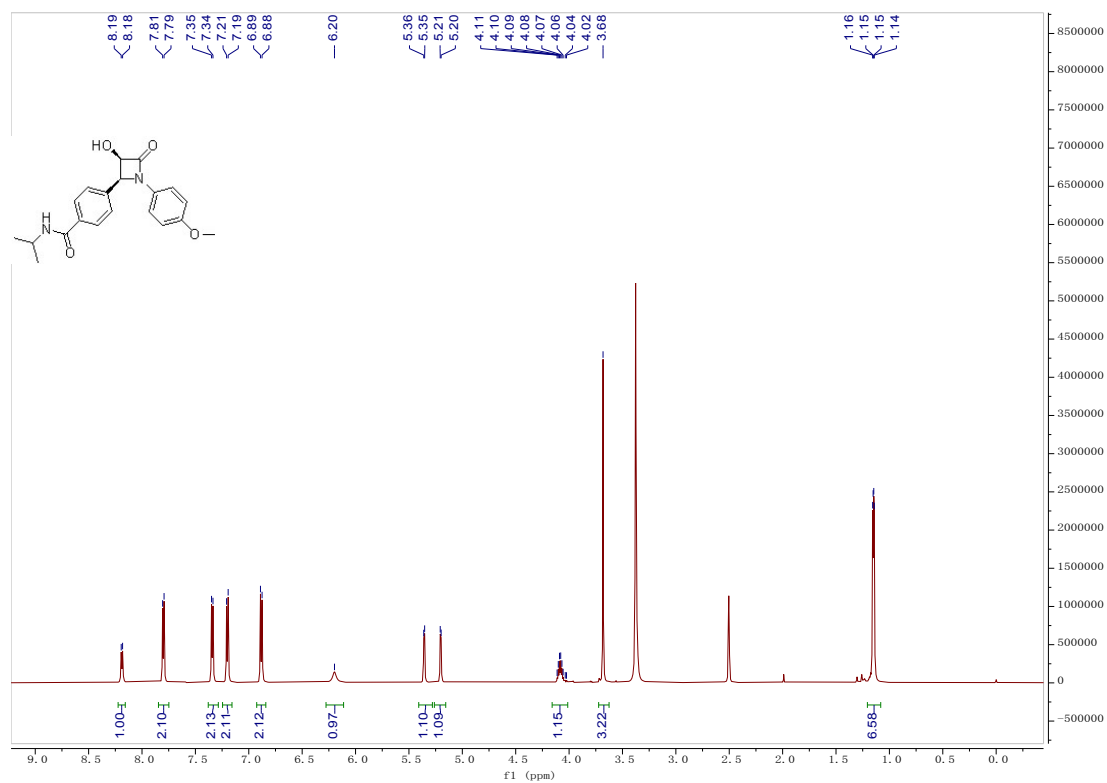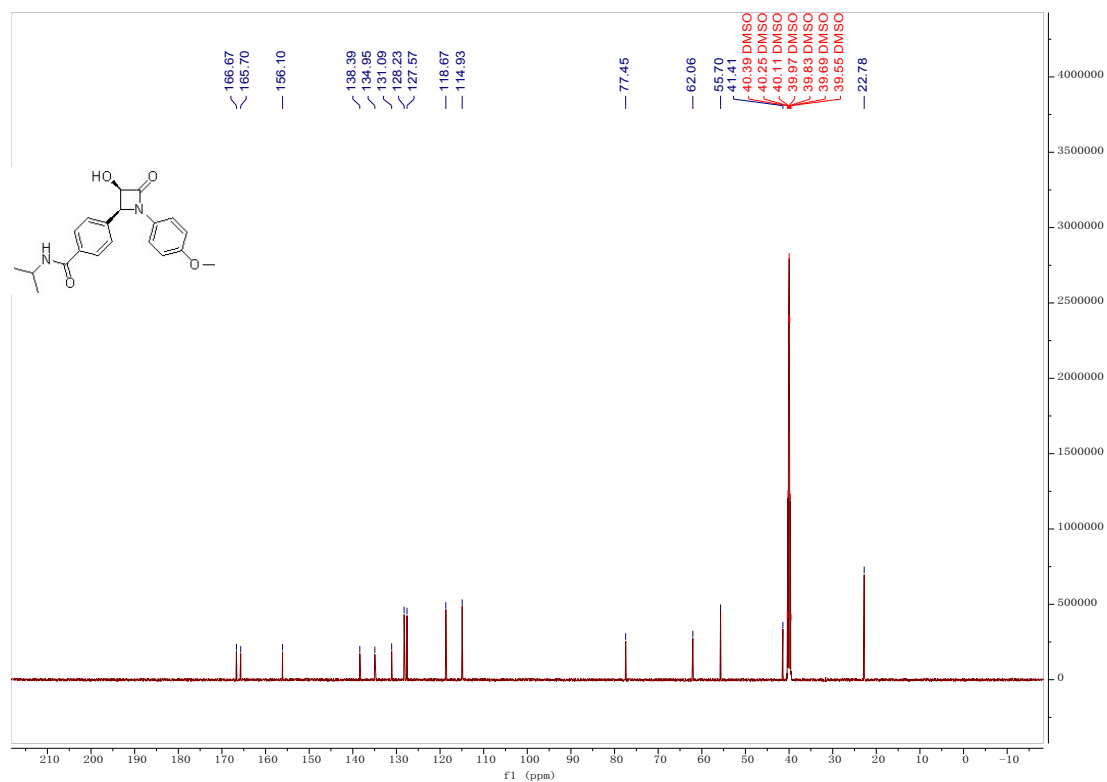



# <sup>1</sup>H NMR and <sup>13</sup>C NMR of 2u

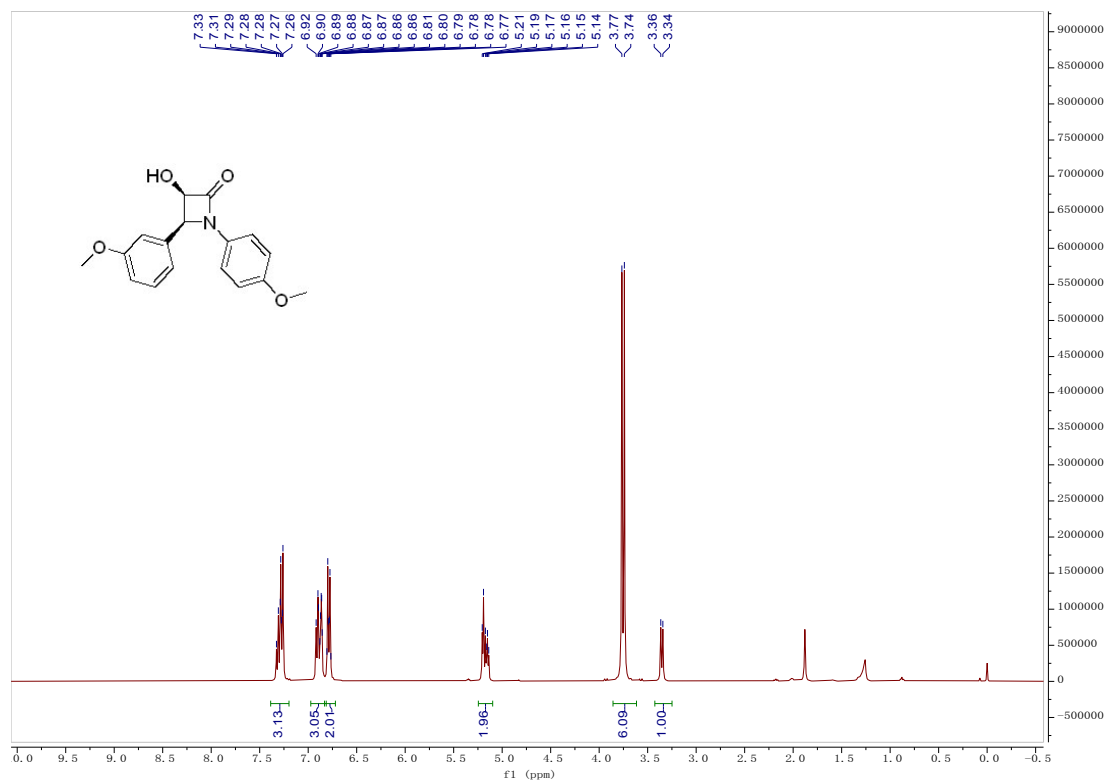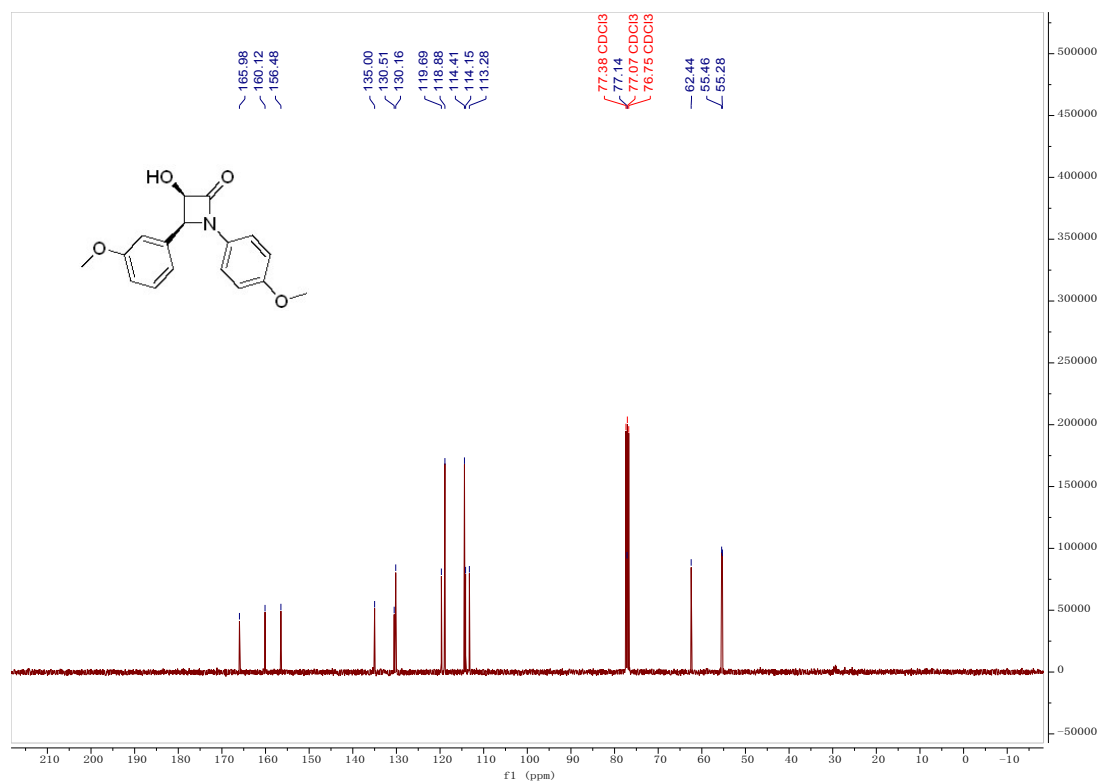

# <sup>1</sup>H NMR and <sup>13</sup>C NMR of 2v

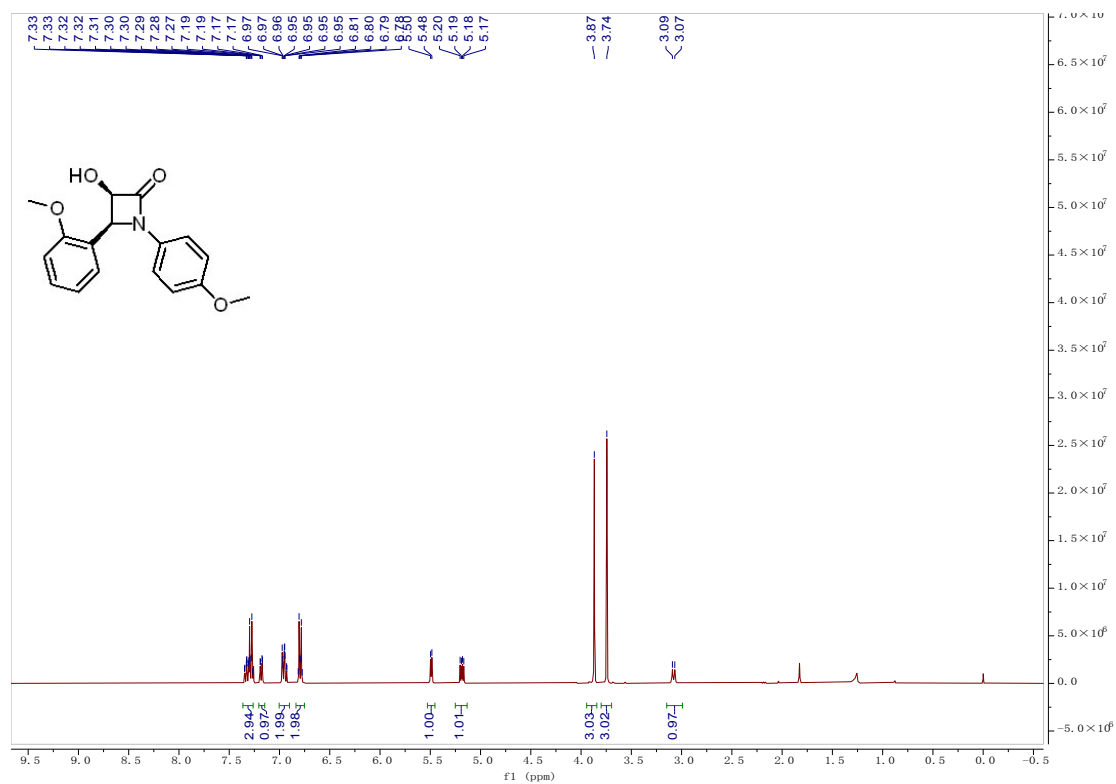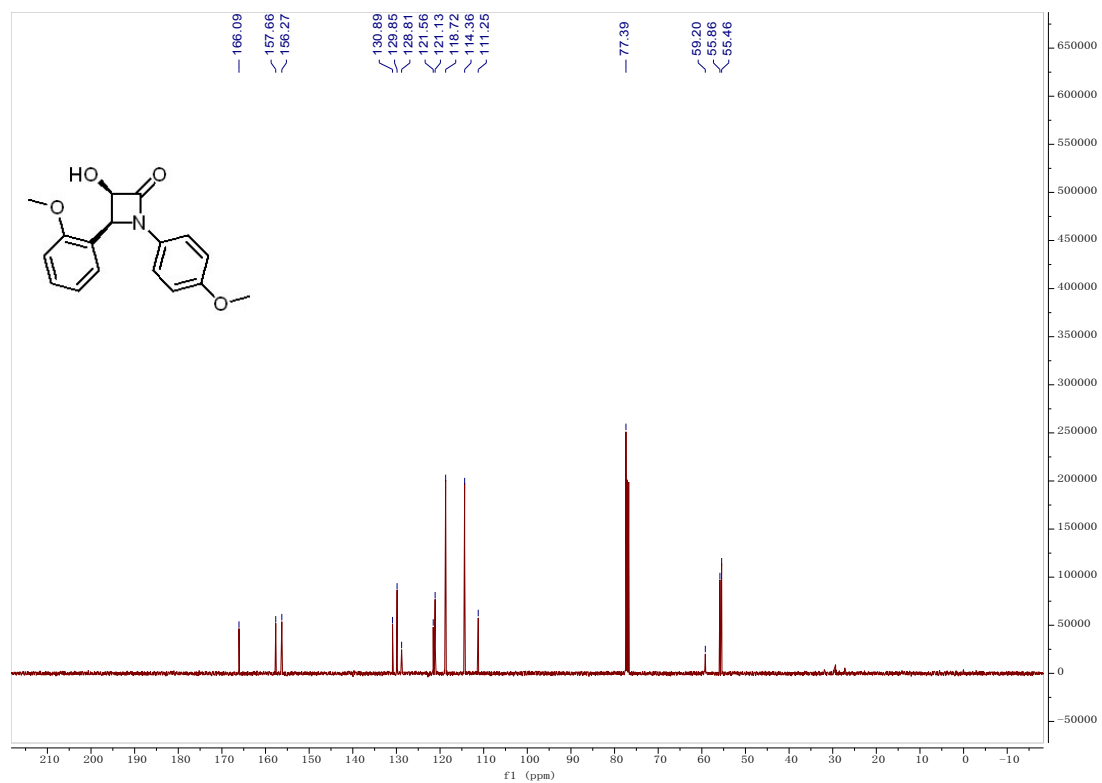

# <sup>1</sup>H NMR and <sup>13</sup>C NMR of 2w

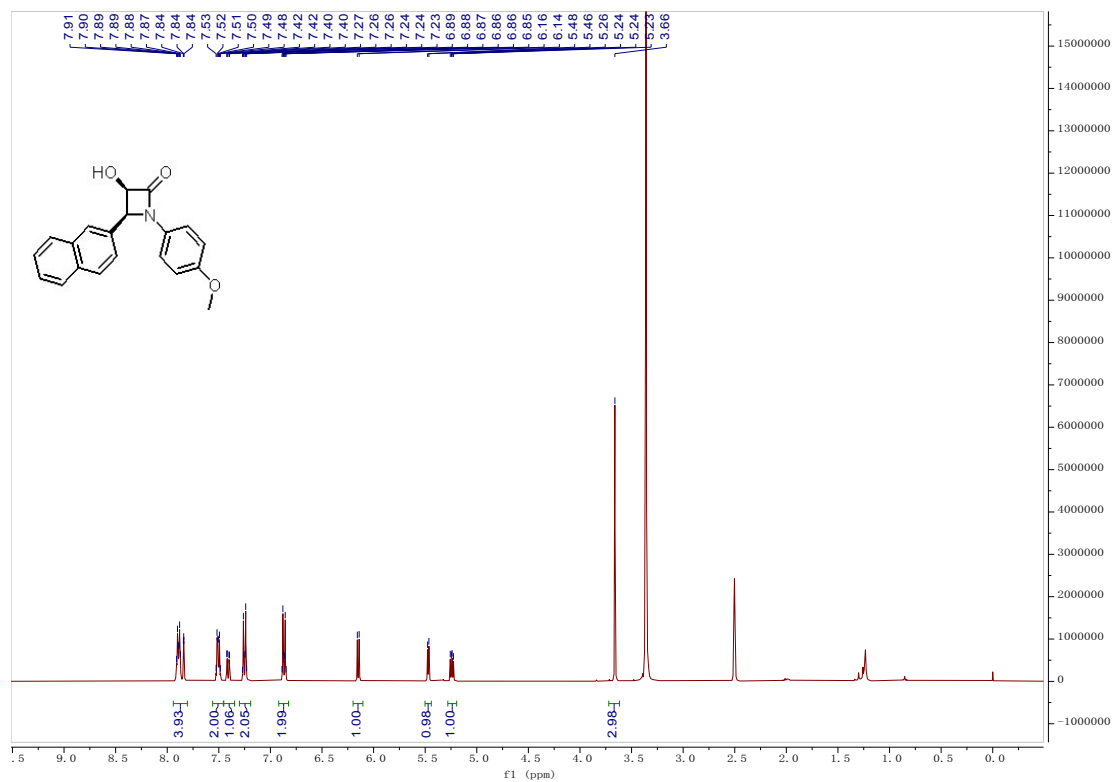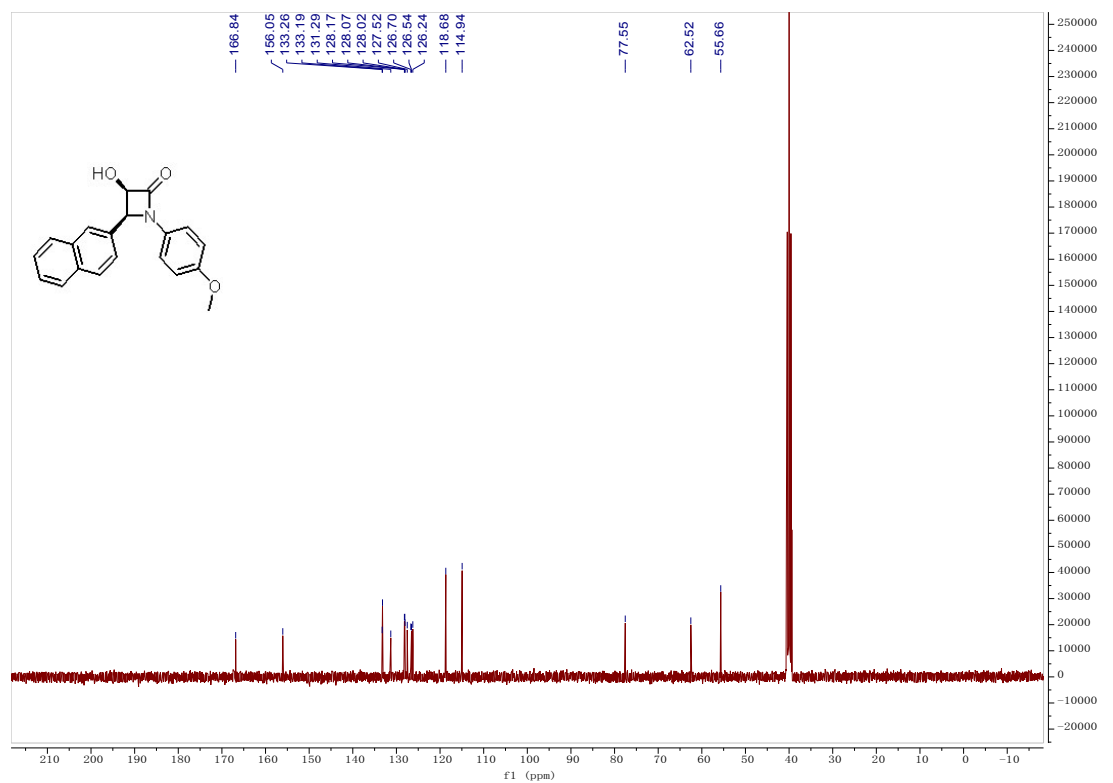

# $^1\text{H}$ NMR and $^{13}\text{C}$ NMR of 2x

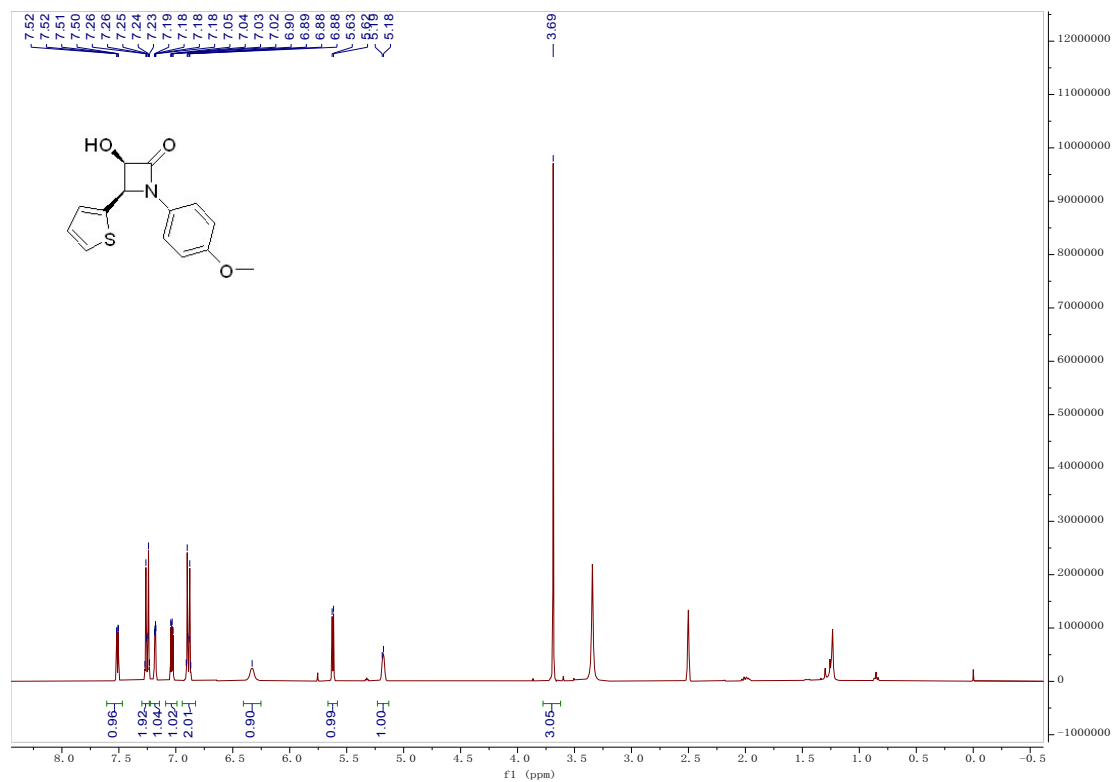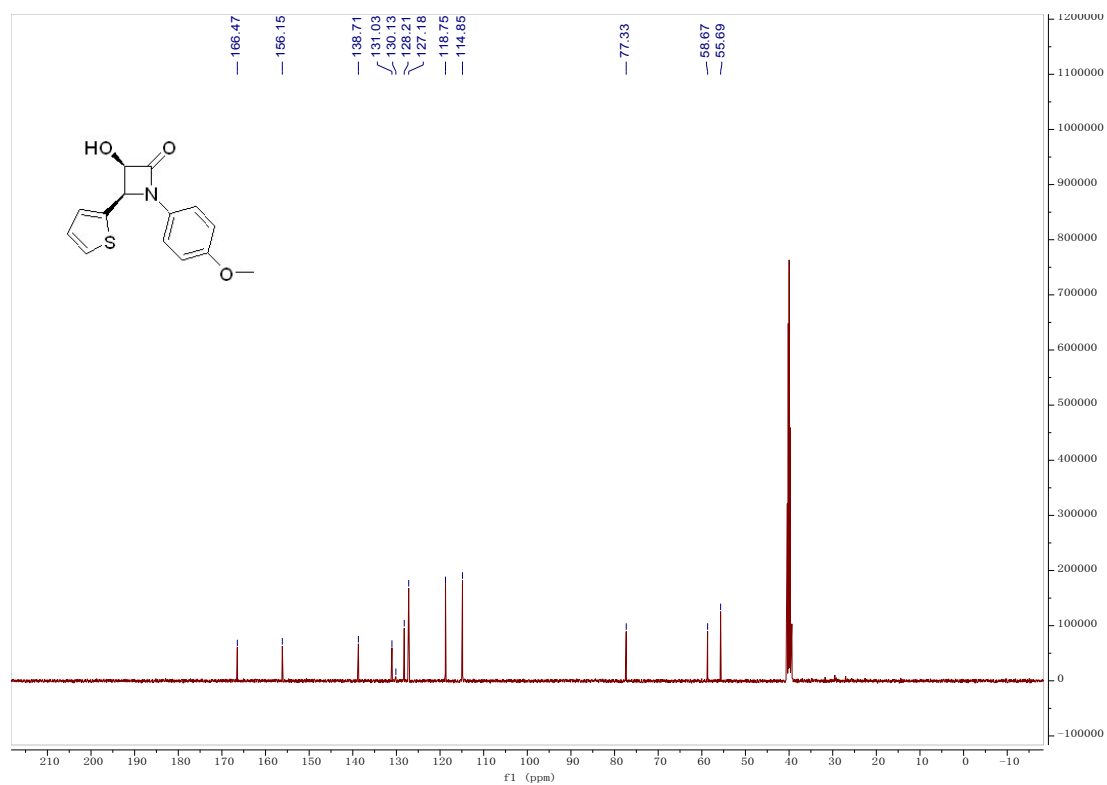

# <sup>1</sup>H NMR and <sup>13</sup>C NMR of 2y

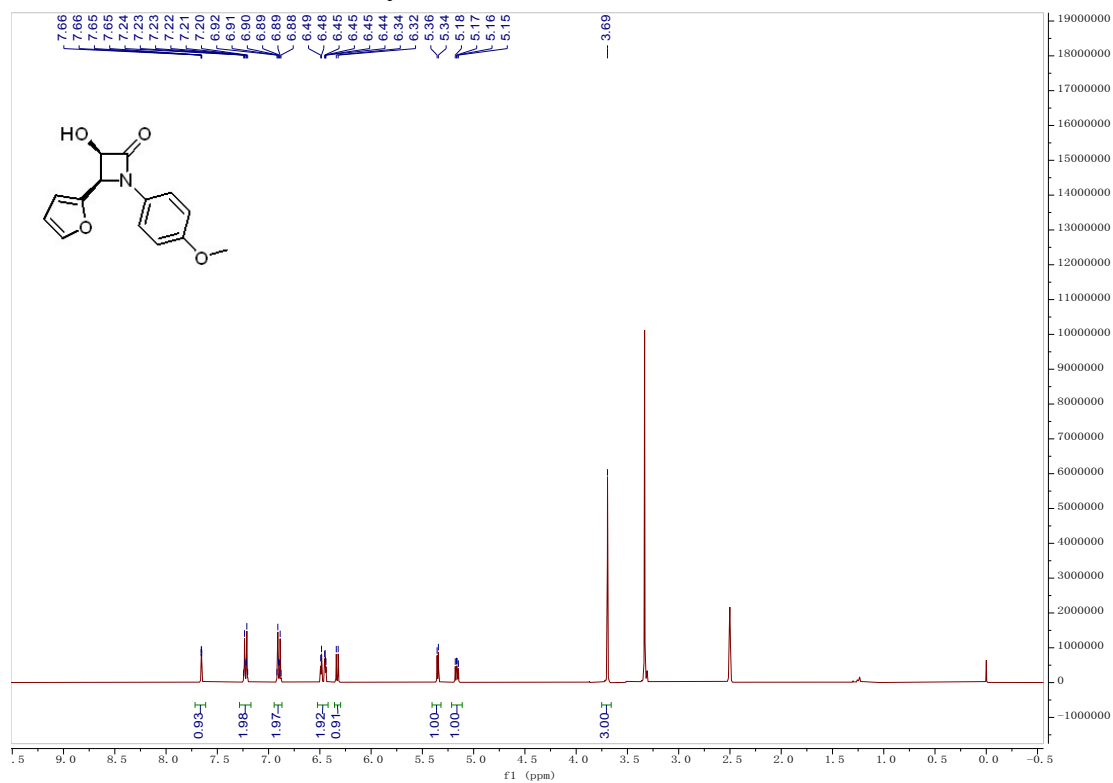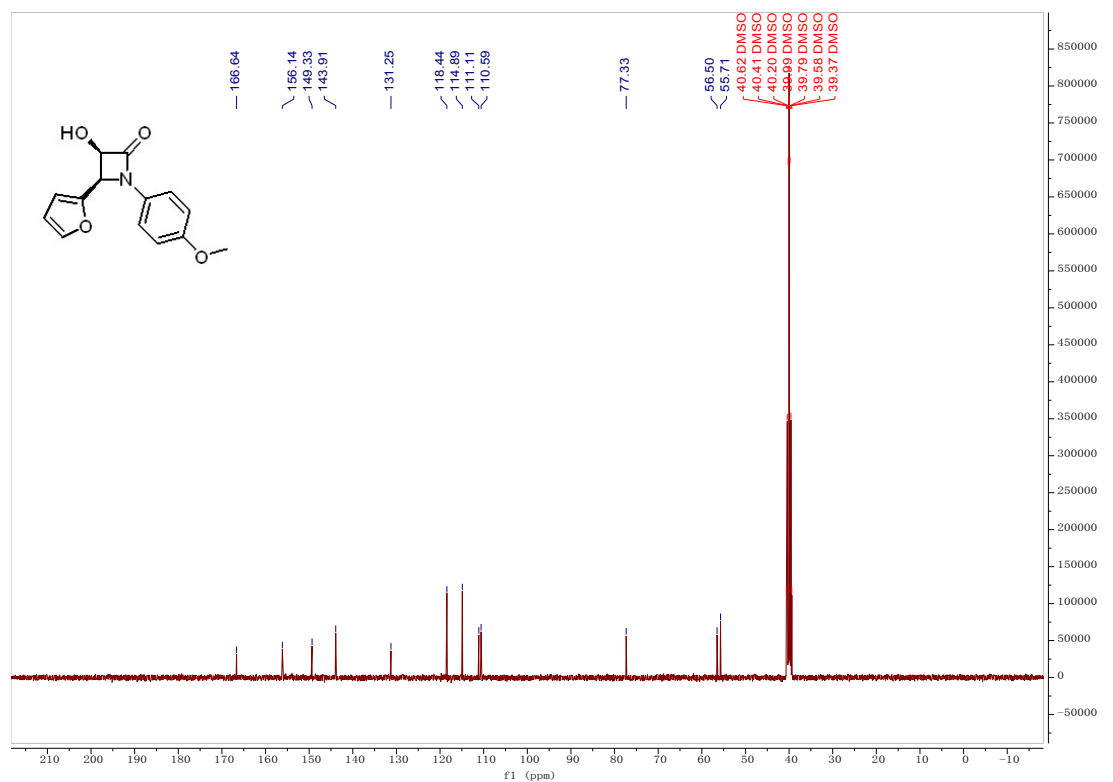

# $^1\text{H}$ NMR and $^{13}\text{C}$ NMR of 2z

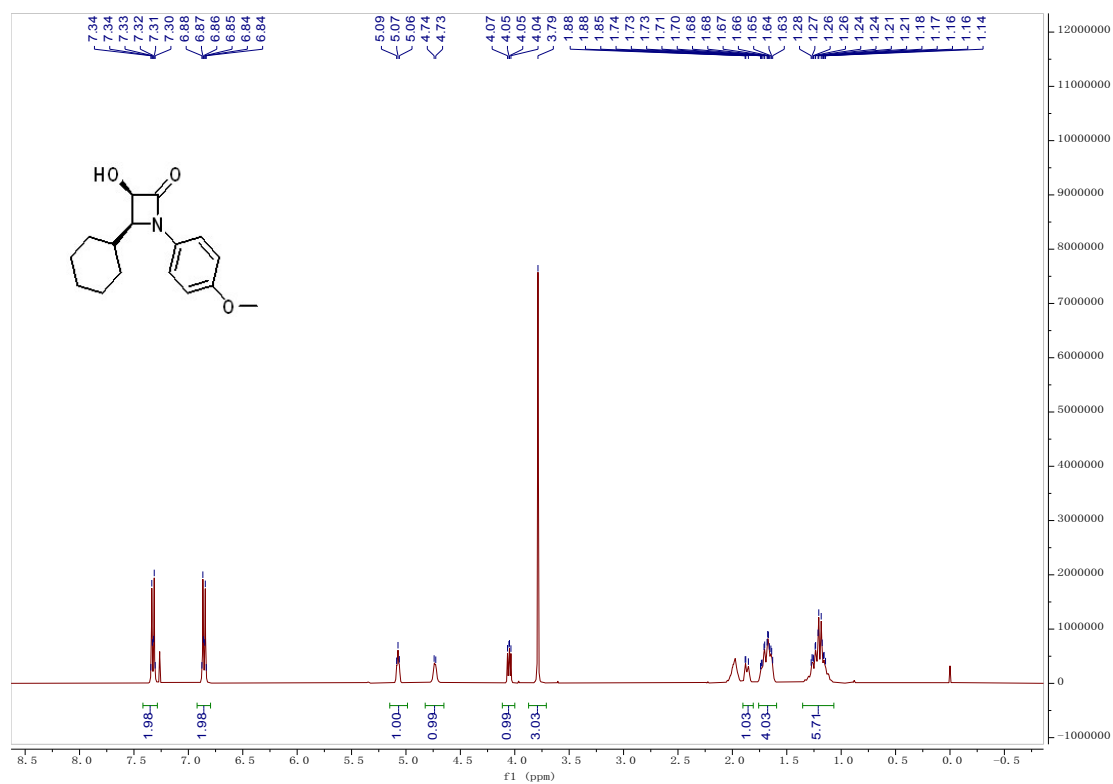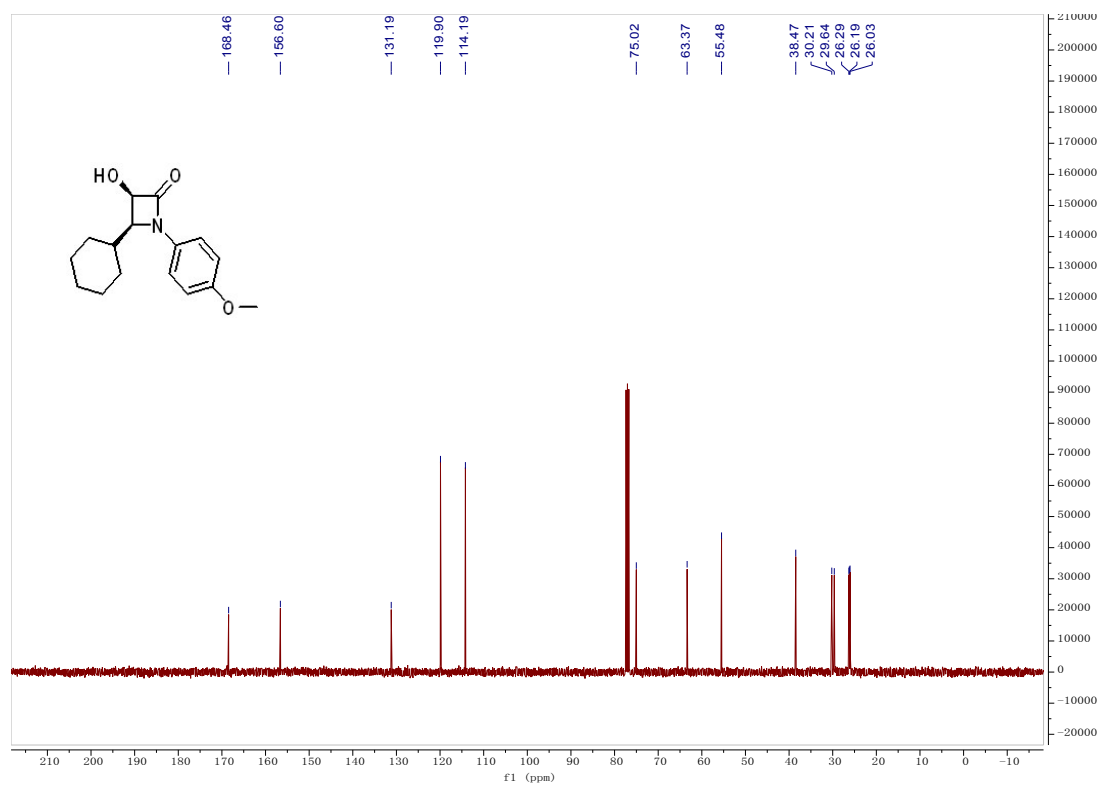

# <sup>1</sup>H NMR and <sup>13</sup>C NMR of 2aa

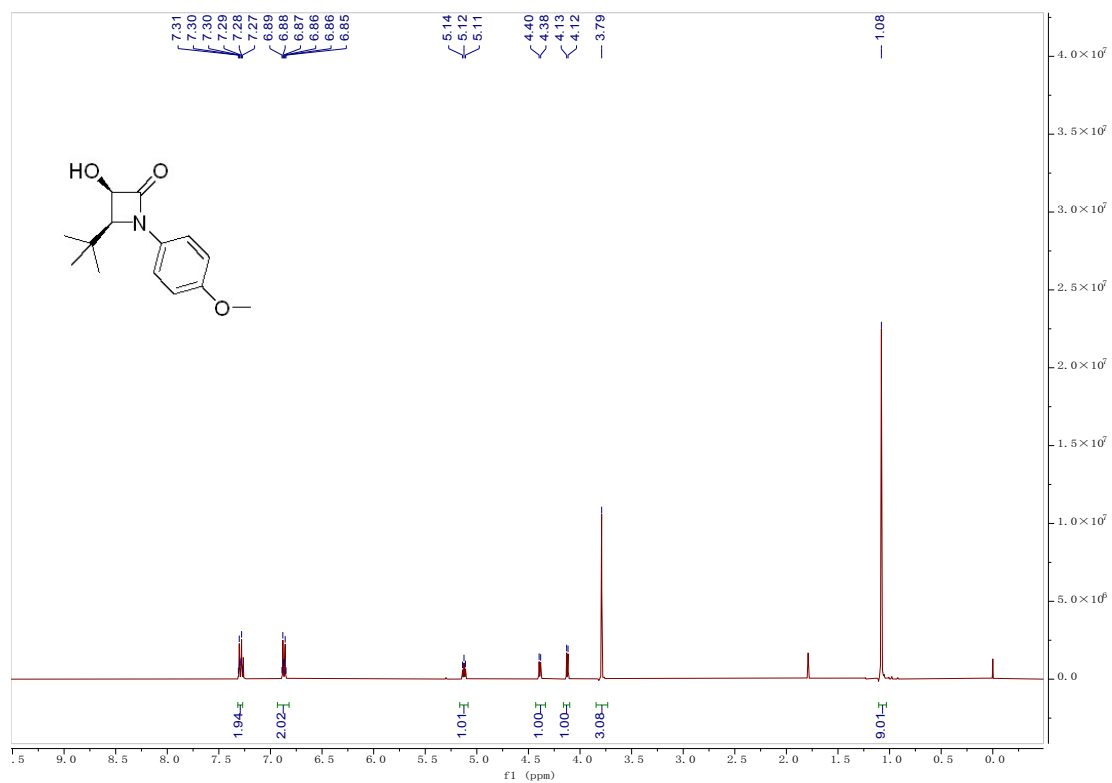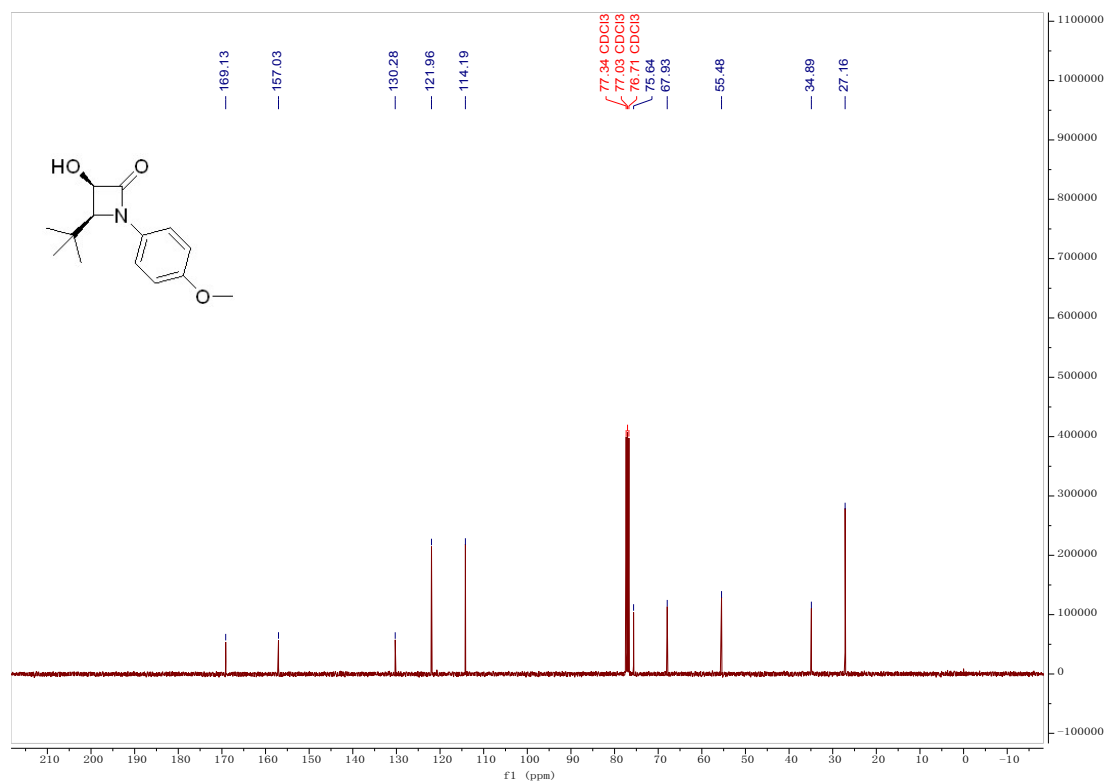

# <sup>1</sup>H NMR and <sup>13</sup>C NMR of 4a

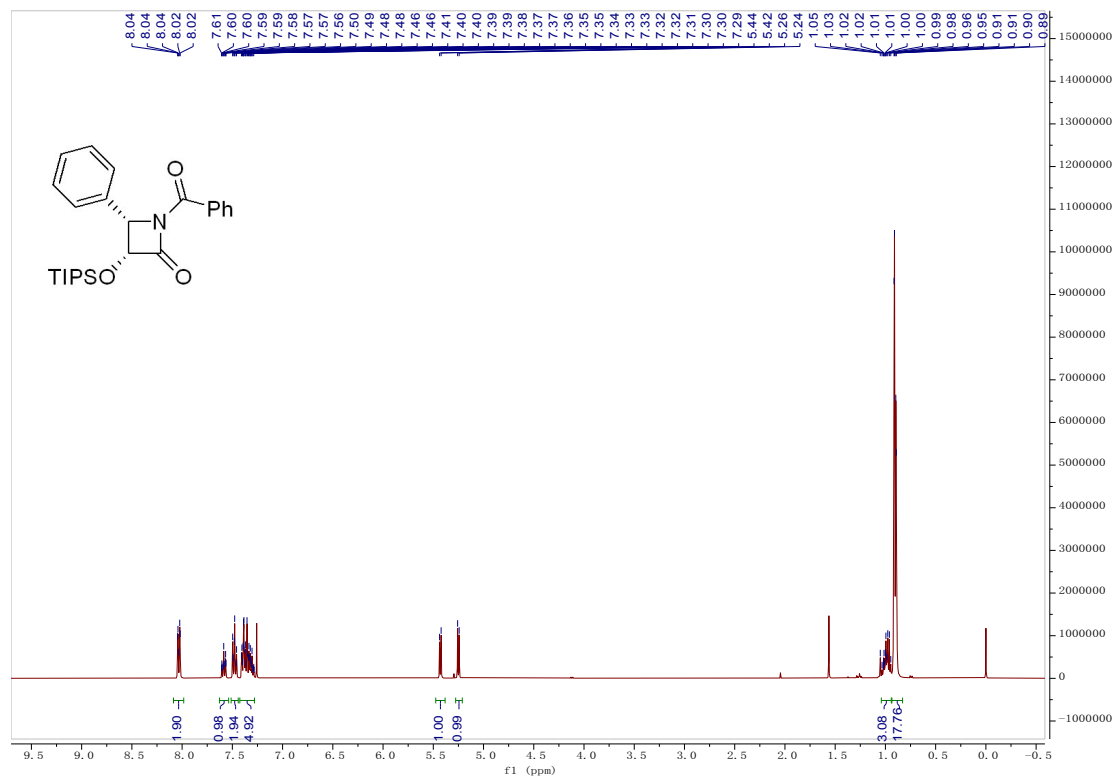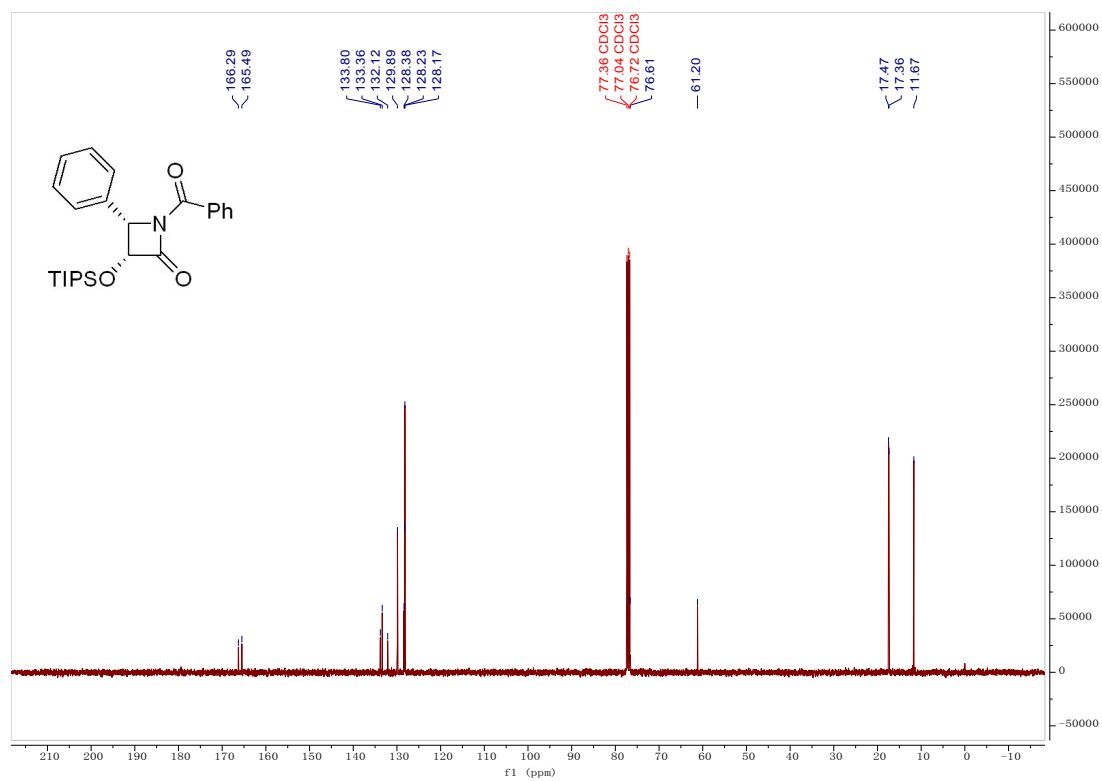



# <sup>1</sup>H NMR and <sup>13</sup>C NMR of 5n

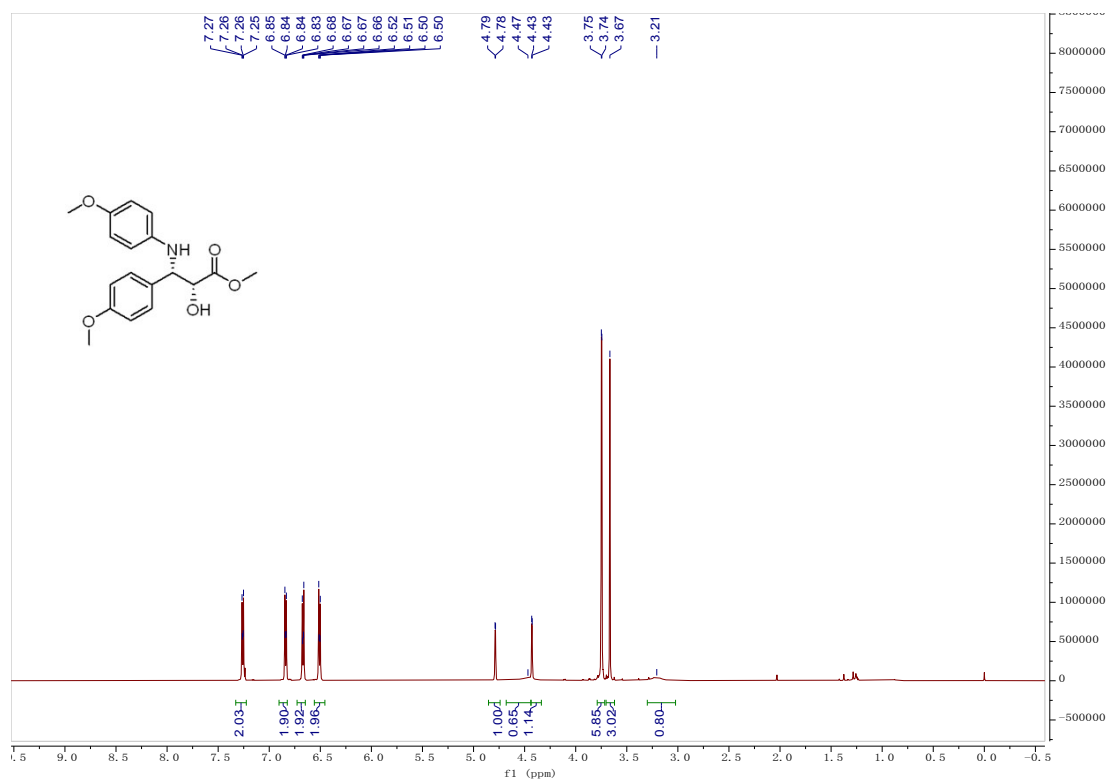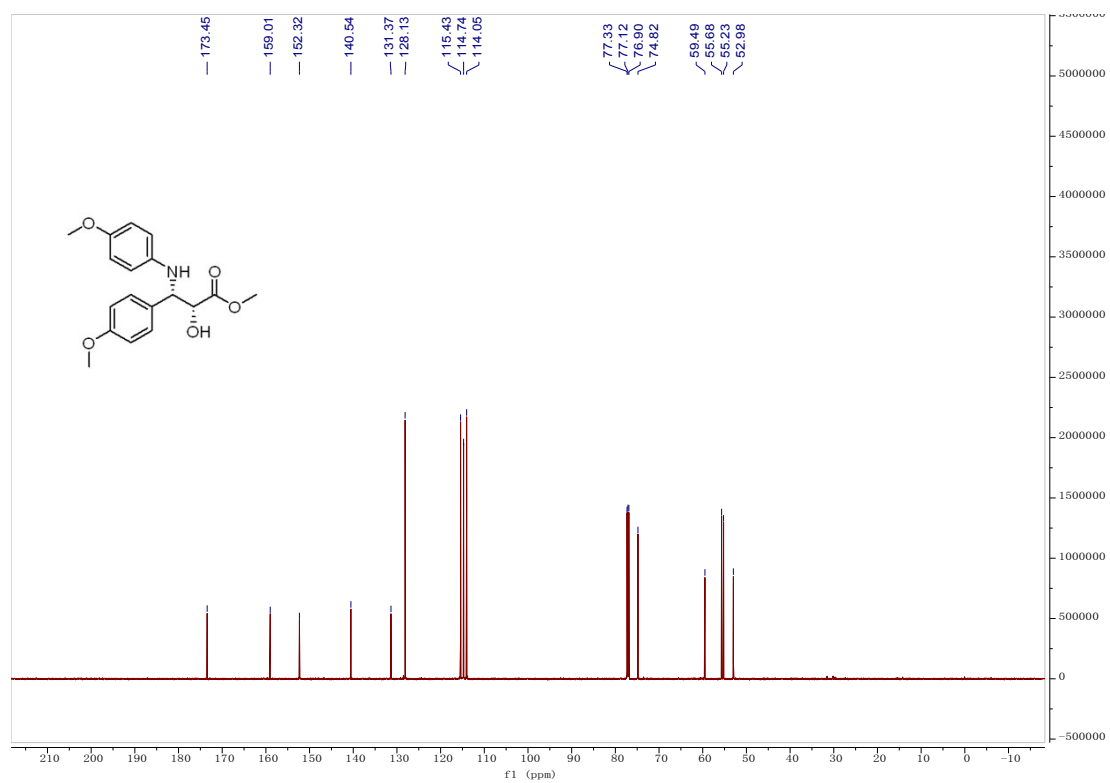



## 9. HPLC Spectra of the Products.

Data File D:\CHEM32\...\WFY-2-117\WFY-2-117 2019-05-12 19-59-00\001-P1-C1-wfy-2-117-rac.D  
 Sample Name: wfy-2-117-rac

```

=====
Acq. Operator   : SYSTEM                      Seq. Line :    1
Acq. Instrument : 1260-DAD                    Location  : P1-C-01
Injection Date  : 5/12/2019 19:59:51         Inj       :    1
                                           Inj Volume: 3.000 µl
Different Inj Volume from Sample Entry! Actual Inj Volume : 2.000 µl
Acq. Method     : D:\Chem32\1\Data\WFY\wfy-2-117\wfy-2-117 2019-05-12 19-59-00\IA-85-15-1ml-30min.M
Last changed    : 1/7/2019 21:25:37 by SYSTEM
Analysis Method : D:\Chem32\1\Data\WFY\wfy-2-117\wfy-2-117 2019-05-12 19-59-00\IA-85-15-1ml-30min.M (Sequence Method)
Last changed    : 4/19/2020 22:41:24 by SYSTEM
                 (modified after loading)
Additional Info  : Peak(s) manually integrated
  
```

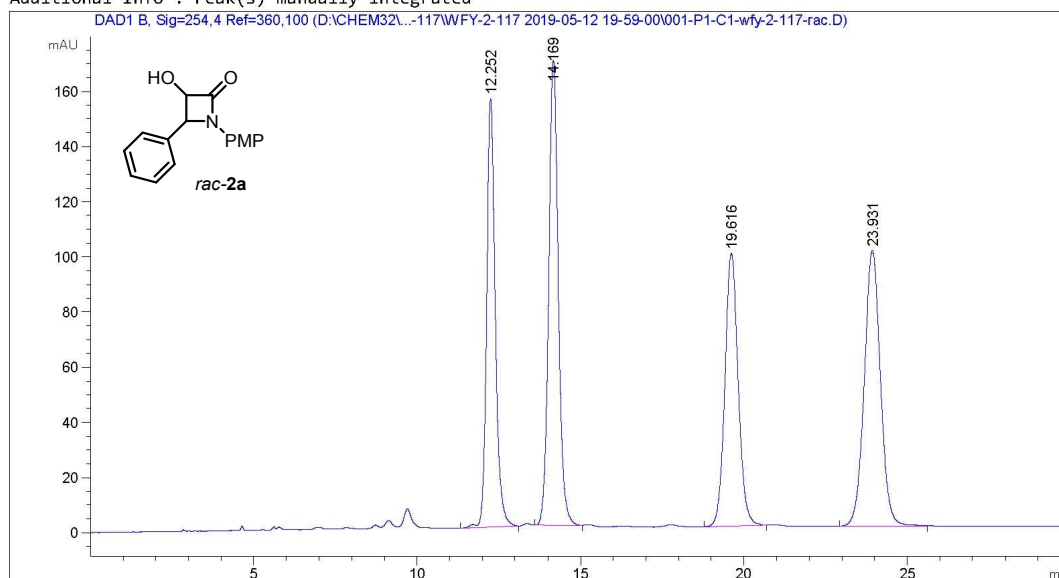

### Area Percent Report

```

Sorted By      : Signal
Multiplier     : 1.0000
Dilution       : 1.0000
Use Multiplier & Dilution Factor with ISTDs
  
```

Signal 1: DAD1 B, Sig=254,4 Ref=360,100

| Peak # | RetTime [min] | Type | Width [min] | Area [mAU*s] | Height [mAU] | Area %  |
|--------|---------------|------|-------------|--------------|--------------|---------|
| 1      | 12.252        | VB R | 0.2749      | 2826.83594   | 155.51921    | 22.6851 |
| 2      | 14.169        | BB   | 0.3112      | 3427.30908   | 168.54640    | 27.5039 |
| 3      | 19.616        | BB   | 0.4302      | 2783.29785   | 98.95164     | 22.3357 |
| 4      | 23.931        | BB   | 0.5299      | 3423.74170   | 99.87918     | 27.4753 |

Data File D:\CHEM32\...\Wfy-3-35-COMPLEX 2019-09-09 15-50-15\003-P1-A5-wfy-3-DCM complex.D  
Sample Name: wfy-3-DCM complex

=====

|                 |                     |            |            |
|-----------------|---------------------|------------|------------|
| Acq. Operator   | : SYSTEM            | Seq. Line  | : 3        |
| Acq. Instrument | : 1260-DAD          | Location   | : P1-A-05  |
| Injection Date  | : 9/9/2019 16:37:24 | Inj        | : 1        |
|                 |                     | Inj Volume | : 3.000 µl |

Different Inj Volume from Sample Entry! Actual Inj Volume : 5.000 µl

|                 |                                                                                                             |
|-----------------|-------------------------------------------------------------------------------------------------------------|
| Acq. Method     | : D:\Chem32\1\Data\Wfy\wfy-3-35\wfy-3-35-complex 2019-09-09 15-50-15\IA-85-15-1ml-30min.M                   |
| Last changed    | : 1/7/2019 21:25:37 by SYSTEM                                                                               |
| Analysis Method | : D:\Chem32\1\Data\Wfy\wfy-3-35\wfy-3-35-complex 2019-09-09 15-50-15\IA-85-15-1ml-30min.M (Sequence Method) |
| Last changed    | : 4/19/2020 22:40:02 by SYSTEM (modified after loading)                                                     |

Additional Info : Peak(s) manually integrated

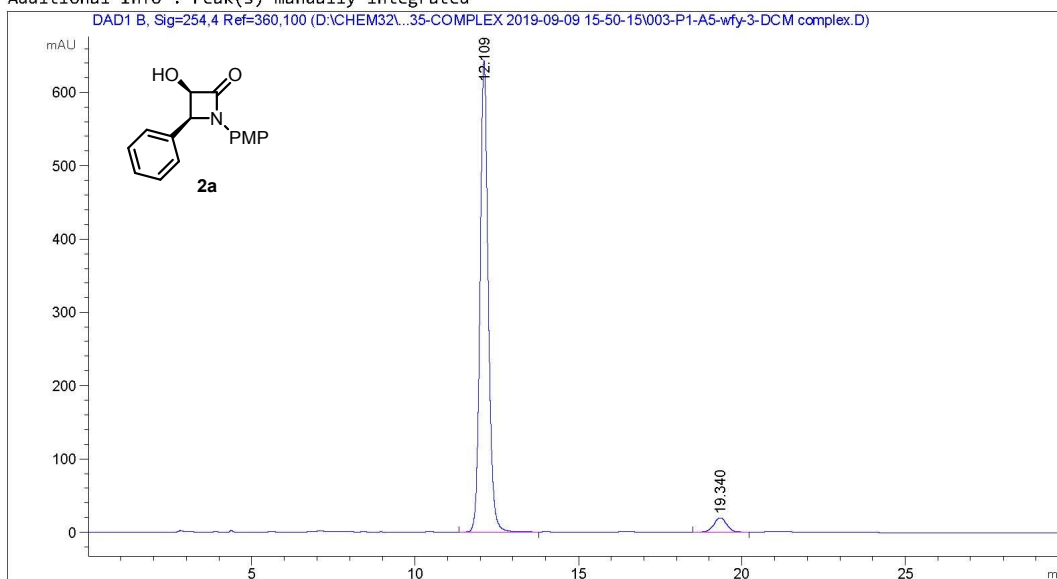

=====  
Area Percent Report  
=====

Sorted By : Signal  
Multiplier : 1.0000  
Dilution : 1.0000  
Use Multiplier & Dilution Factor with ISTDs

Signal 1: DAD1 B, Sig=254,4 Ref=360,100

| Peak # | RetTime [min] | Type | Width [min] | Area [mAU*s] | Height [mAU] | Area %  |
|--------|---------------|------|-------------|--------------|--------------|---------|
| 1      | 12.109        | BB   | 0.2652      | 1.12109e4    | 643.78705    | 95.3865 |
| 2      | 19.340        | BB   | 0.4181      | 542.23633    | 19.76000     | 4.6135  |

Totals : 1.17532e4 663.54705

Data File D:\CHEM32\...FY-3-60\WFY-3-60 2019-10-21 10-19-44\013-P1-E11-WFY-3-60-N-ph-rac.D  
 Sample Name: WFY-3-60-N-ph-rac

```
=====
Acq. Operator   : SYSTEM                      Seq. Line :   13
Acq. Instrument : 1260-DAD                   Location  : P1-E-11
Injection Date  : 10/21/2019 15:55:45       Inj       :    1
                                           Inj Volume: 3.000 µl

Acq. Method     : D:\Chem32\1\Data\WFY\WFY-3-60\wfy-3-60 2019-10-21 10-19-44\IA-90-10-1.0ml-
                  25min.M
Last changed    : 3/16/2019 16:37:28 by SYSTEM
Analysis Method : D:\Chem32\1\Data\WFY\WFY-3-60\wfy-3-60 2019-10-21 10-19-44\IA-90-10-1.0ml-
                  25min.M (Sequence Method)
Last changed    : 11/15/2019 16:31:39 by SYSTEM
                  (modified after loading)
=====
```

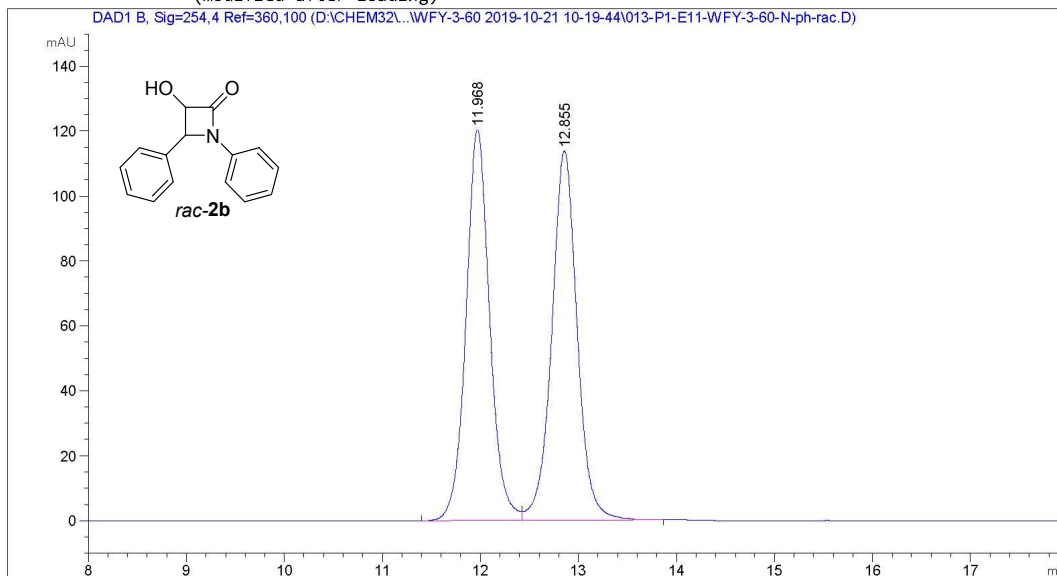

Area Percent Report

```
Sorted By      : Signal
Multiplier     : 1.0000
Dilution       : 1.0000
Use Multiplier & Dilution Factor with ISTDs
```

Signal 1: DAD1 B, Sig=254,4 Ref=360,100

| Peak # | RetTime [min] | Type | Width [min] | Area [mAU*s] | Height [mAU] | Area %  |
|--------|---------------|------|-------------|--------------|--------------|---------|
| 1      | 11.968        | BV   | 0.2536      | 2017.66260   | 120.31926    | 49.6550 |
| 2      | 12.855        | VB   | 0.2718      | 2045.69629   | 113.74475    | 50.3450 |

Totals : 4063.35889 234.06401

```

=====
Acq. Operator   : SYSTEM                      Seq. Line :   14
Acq. Instrument : 1260-DAD                    Location  : P1-F-11
Injection Date  : 10/21/2019 16:21:40        Inj       :    1
                                           Inj Volume: 3.000 µl
Different Inj Volume from Sample Entry! Actual Inj Volume : 10.000 µl
Acq. Method     : D:\Chem32\1\Data\WFY\WFY-3-60\wfy-3-60 2019-10-21 10-19-44\IA-90-10-1.0ml-
                25min.M
Last changed    : 3/16/2019 16:37:28 by SYSTEM
Analysis Method : D:\Chem32\1\Data\WFY\WFY-3-60\wfy-3-60 2019-10-21 10-19-44\IA-90-10-1.0ml-
                25min.M (Sequence Method)
Last changed    : 11/15/2019 16:32:19 by SYSTEM
                (modified after loading)
Additional Info : Peak(s) manually integrated
  
```

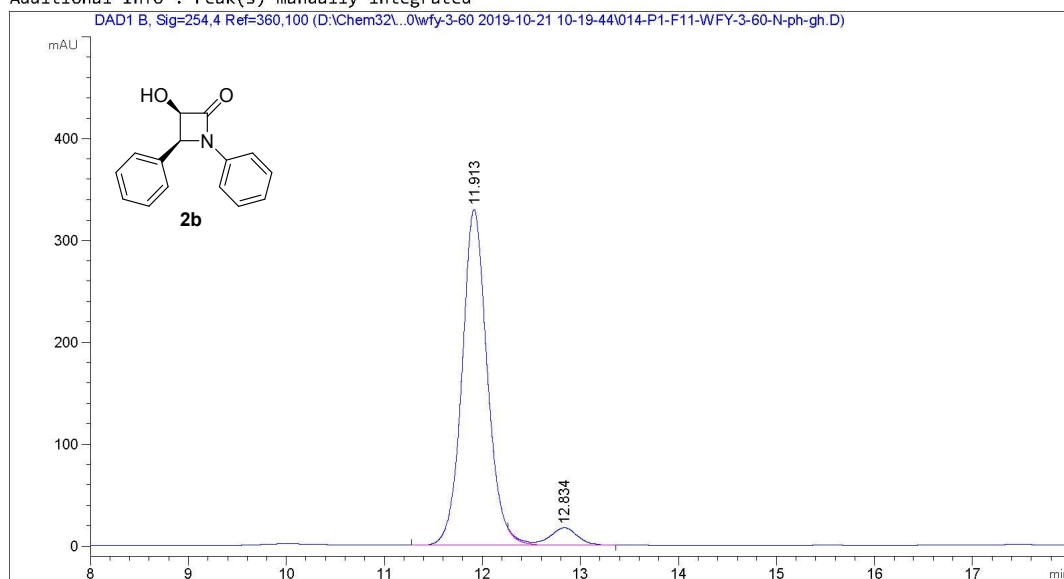

Area Percent Report

```

Sorted By      :      Signal
Multiplier     :      1.0000
Dilution      :      1.0000
Use Multiplier & Dilution Factor with ISTDs
  
```

Signal 1: DAD1 B, Sig=254,4 Ref=360,100

| Peak # | RetTime [min] | Type | Width [min] | Area [mAU*s] | Height [mAU] | Area %  |
|--------|---------------|------|-------------|--------------|--------------|---------|
| 1      | 11.913        | BV R | 0.2708      | 5905.14404   | 329.88065    | 94.5105 |
| 2      | 12.834        | VB E | 0.3011      | 342.98813    | 17.01727     | 5.4895  |

Totals :                                  6248.13217    346.89791

```

=====
Acq. Operator   : SYSTEM                      Seq. Line :    2
Sample Operator : SYSTEM
Acq. Instrument : LC                        Location  : P1-E-01
Injection Date  : 6/30/2019 4:28:26 PM      Inj       :    1
                                           Inj Volume: 1.000 µl
Different Inj Volume from Sample Entry! Actual Inj Volume : 3.000 µl
Acq. Method     : D:\ChemStation\1\Data\WfY\wfy-2-186\wfy-2-186 2019-06-30 16-17-10\IA-85-15-
                  1ML-30 min.M
Last changed    : 6/26/2019 8:16:18 PM by SYSTEM
Analysis Method : D:\ChemStation\1\Data\WfY\wfy-2-186\wfy-2-186 2019-06-30 16-17-10\IA-85-15-
                  1ML-30 min.M (Sequence Method)
Last changed    : 12/18/2019 8:25:53 PM by SYSTEM
                  (modified after loading)
  
```

Additional Info : Peak(s) manually integrated

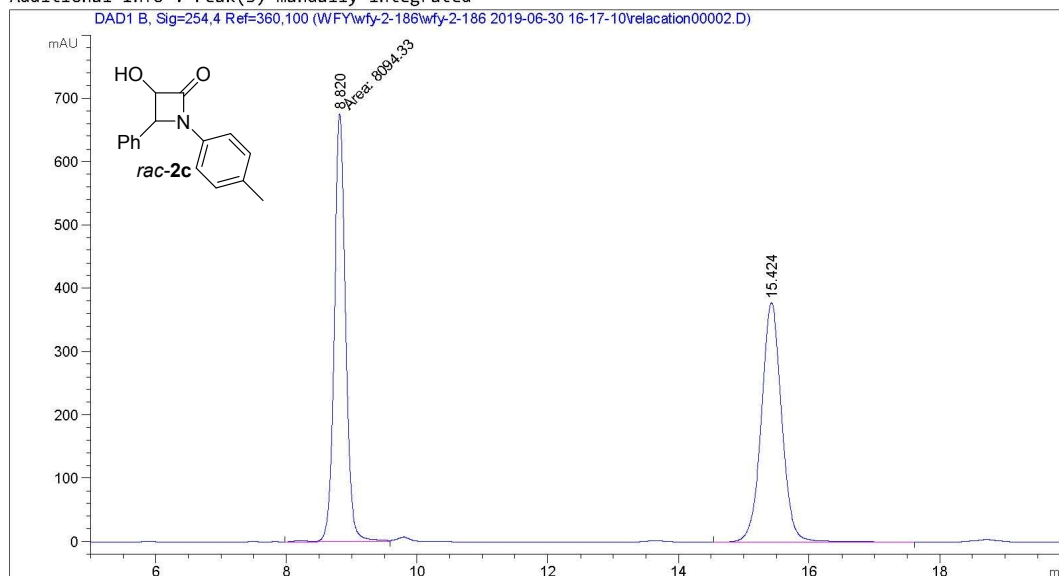

Area Percent Report

```

Sorted By      : Signal
Multiplier     : 1.0000
Dilution       : 1.0000
Use Multiplier & Dilution Factor with ISTDs
  
```

Signal 1: DAD1 B, Sig=254,4 Ref=360,100

| Peak # | RetTime [min] | Type | Width [min] | Area [mAU*s] | Height [mAU] | Area %  |
|--------|---------------|------|-------------|--------------|--------------|---------|
| 1      | 8.820         | MF   | 0.1995      | 8094.32568   | 676.24884    | 50.0021 |
| 2      | 15.424        | BB   | 0.3260      | 8093.64795   | 377.72263    | 49.9979 |

```

=====
Acq. Operator   : SYSTEM                      Seq. Line :    4
Sample Operator : SYSTEM
Acq. Instrument : LC                        Location  : P1-E-03
Injection Date  : 6/30/2019 5:30:16 PM      Inj       :    1
                                           Inj Volume: 1.000 µl
Different Inj Volume from Sample Entry! Actual Inj Volume : 10.000 µl
Acq. Method     : D:\ChemStation\1\Data\WfY\wfy-2-186\wfy-2-186 2019-06-30 16-17-10\IA-85-15-
                  1ML-30 min.M
Last changed    : 6/26/2019 8:16:18 PM by SYSTEM
Analysis Method : D:\ChemStation\1\Data\WfY\wfy-2-186\wfy-2-186 2019-06-30 16-17-10\IA-85-15-
                  1ML-30 min.M (Sequence Method)
Last changed    : 12/18/2019 8:24:30 PM by SYSTEM
                  (modified after loading)
Additional Info : Peak(s) manually integrated
  
```

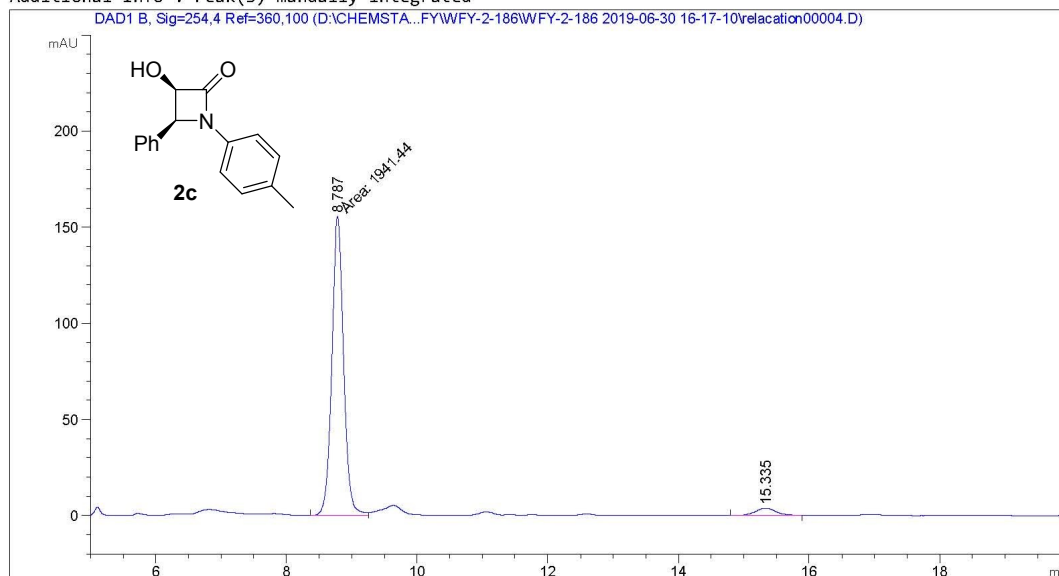

Area Percent Report

```

Sorted By      : Signal
Multiplier     : 1.0000
Dilution       : 1.0000
Use Multiplier & Dilution Factor with ISTDs
  
```

Signal 1: DAD1 B, Sig=254,4 Ref=360,100

| Peak # | RetTime [min] | Type | Width [min] | Area [mAU*s] | Height [mAU] | Area %  |
|--------|---------------|------|-------------|--------------|--------------|---------|
| 1      | 8.787         | MF   | 0.2081      | 1941.43738   | 155.46277    | 96.0785 |
| 2      | 15.335        | BB   | 0.3267      | 79.24133     | 3.68805      | 3.9215  |





=====

|                 |                       |            |            |
|-----------------|-----------------------|------------|------------|
| Acq. Operator   | : SYSTEM              | Seq. Line  | : 11       |
| Acq. Instrument | : 1260-DAD            | Location   | : P1-E-10  |
| Injection Date  | : 10/21/2019 15:14:25 | Inj        | : 1        |
|                 |                       | Inj Volume | : 3.000 µl |

Different Inj Volume from Sample Entry! Actual Inj Volume : 10.000 µl

|                 |                                                                                                     |
|-----------------|-----------------------------------------------------------------------------------------------------|
| Acq. Method     | : D:\Chem32\1\Data\WFY\WFY-3-60\wfy-3-60 2019-10-21 10-19-44\IA-85-15-1ml-30min.M                   |
| Last changed    | : 1/7/2019 21:25:37 by SYSTEM                                                                       |
| Analysis Method | : D:\Chem32\1\Data\WFY\WFY-3-60\wfy-3-60 2019-10-21 10-19-44\IA-85-15-1ml-30min.M (Sequence Method) |
| Last changed    | : 11/15/2019 16:29:33 by SYSTEM<br>(modified after loading)                                         |

Additional Info : Peak(s) manually integrated

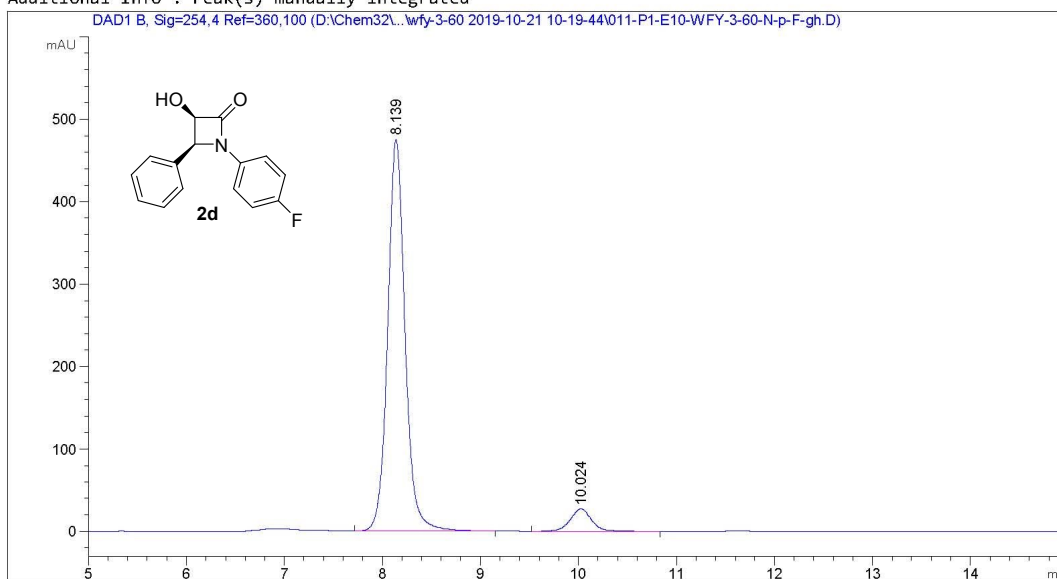

=====  
Area Percent Report  
=====

Sorted By : Signal  
Multiplier : 1.0000  
Dilution : 1.0000  
Use Multiplier & Dilution Factor with ISTDs

Signal 1: DAD1 B, Sig=254,4 Ref=360,100

| Peak # | RetTime [min] | Type | Width [min] | Area [mAU*s] | Height [mAU] | Area %  |
|--------|---------------|------|-------------|--------------|--------------|---------|
| 1      | 8.139         | BB   | 0.1850      | 5822.56787   | 475.07040    | 93.5051 |
| 2      | 10.024        | BB   | 0.2258      | 404.43726    | 27.14475     | 6.4949  |

Totals : 6227.00513 502.21515

Data File D:\CHEM32\...Y-3-60\Wfy-3-60 2019-10-21 10-19-44\008-P1-E7-WFY-3-60-N-p-Br-rac.D  
 Sample Name: WFY-3-60-N-p-Br-rac

```

=====
Acq. Operator   : SYSTEM                      Seq. Line :    8
Acq. Instrument : 1260-DAD                    Location  : P1-E-07
Injection Date  : 10/21/2019 13:41:37        Inj       :    1
                                           Inj Volume: 3.000 µl

Acq. Method    : D:\Chem32\1\Data\Wfy\Wfy-3-60\wfy-3-60 2019-10-21 10-19-44\IA-85-15-1ml-
                30min.M
Last changed   : 1/7/2019 21:25:37 by SYSTEM
Analysis Method : D:\Chem32\1\Data\Wfy\Wfy-3-60\wfy-3-60 2019-10-21 10-19-44\IA-85-15-1ml-
                30min.M (Sequence Method)
Last changed   : 11/15/2019 16:26:42 by SYSTEM
                (modified after loading)
Additional Info : Peak(s) manually integrated
  
```

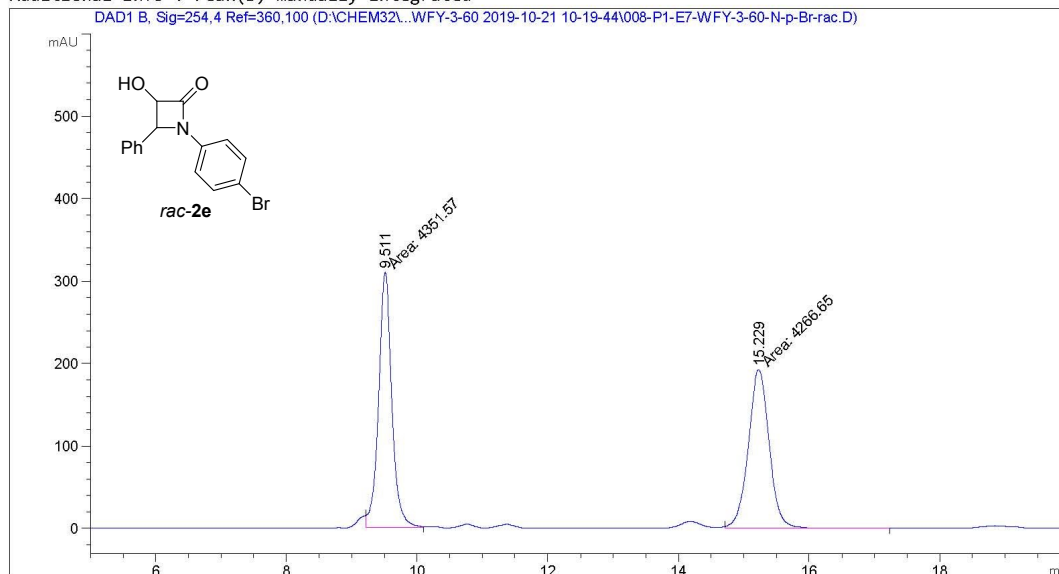

Area Percent Report

```

=====
Sorted By      : Signal
Multiplier     : 1.0000
Dilution      : 1.0000
Use Multiplier & Dilution Factor with ISTDs
  
```

Signal 1: DAD1 B, Sig=254,4 Ref=360,100

| Peak # | RetTime [min] | Type | Width [min] | Area [mAU*s] | Height [mAU] | Area %  |
|--------|---------------|------|-------------|--------------|--------------|---------|
| 1      | 9.511         | FM   | 0.2340      | 4351.57227   | 309.97708    | 50.4927 |
| 2      | 15.229        | FM   | 0.3691      | 4266.65186   | 192.66867    | 49.5073 |

Totals : 8618.22412 502.64575



Data File D:\CHEMSTA...\1\DATA\WfY\WfY-3-61\WfY-3-61 2019-11-16 16-09-23\relacation00002.D  
 Sample Name: wfy-3-61-N-MeO-rac

```

=====
Acq. Operator   : SYSTEM                      Seq. Line :    2
Sample Operator : SYSTEM
Acq. Instrument : LC                        Location  : P1-E-01
Injection Date  : 11/16/2019 4:20:40 PM      Inj       :    1
                                           Inj Volume: 1.000 µl
Different Inj Volume from Sample Entry! Actual Inj Volume : 5.000 µl
Acq. Method    : D:\ChemStation\1\Data\WfY\wfy-3-61\wfy-3-61 2019-11-16 16-09-23\OD-3-90-10-
                1ML-30min.M
Last changed   : 6/28/2019 8:29:21 AM by SYSTEM
Analysis Method : D:\ChemStation\1\Data\WfY\wfy-3-61\wfy-3-61 2019-11-16 16-09-23\OD-3-90-10-
                1ML-30min.M (Sequence Method)
Last changed   : 11/19/2019 9:43:05 PM by SYSTEM
                (modified after loading)
  
```

Additional Info : Peak(s) manually integrated

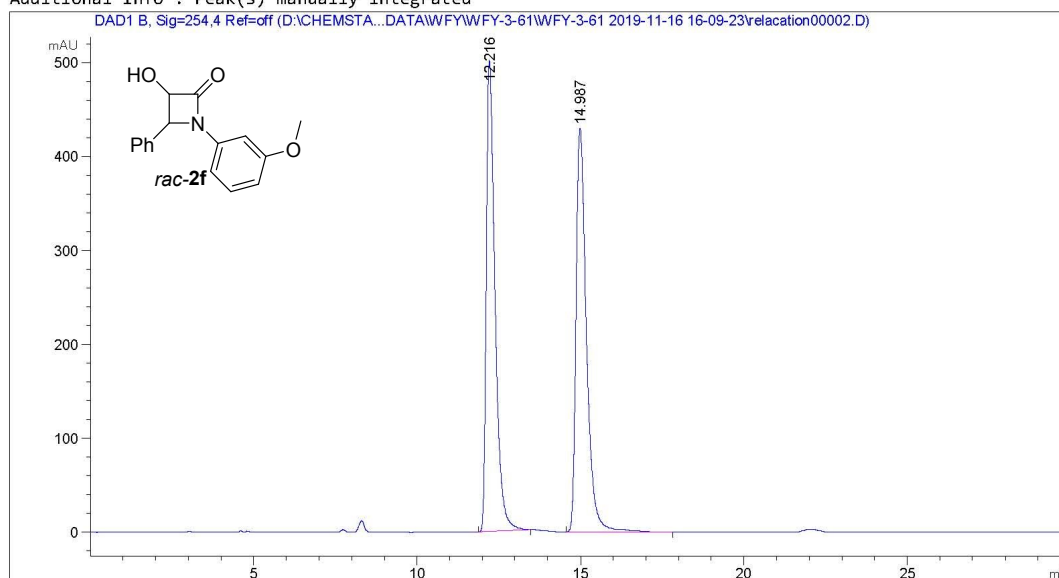

Area Percent Report

```

Sorted By      : Signal
Multiplier     : 1.0000
Dilution       : 1.0000
Use Multiplier & Dilution Factor with ISTDs
  
```

Signal 1: DAD1 B, Sig=254,4 Ref=off

| Peak # | RetTime [min] | Type | Width [min] | Area [mAU*s] | Height [mAU] | Area %  |
|--------|---------------|------|-------------|--------------|--------------|---------|
| 1      | 12.216        | BB   | 0.2782      | 9287.84180   | 501.23859    | 49.4806 |
| 2      | 14.987        | BB   | 0.3336      | 9482.82031   | 429.53882    | 50.5194 |



```

=====
Acq. Operator   : SYSTEM                      Seq. Line :    2
Sample Operator : SYSTEM
Acq. Instrument : LC                        Location  : P2-C-01
Injection Date  : 10/21/2019 9:27:25 AM      Inj       :    1
                                           Inj Volume: 1.000 µl
Different Inj Volume from Sample Entry! Actual Inj Volume : 3.000 µl
Acq. Method    : D:\ChemStation\1\Data\WFY\wfy-3-60\wfy-3-60-N-35Me 2019-10-21 09-16-11\OD-3
               : -90-10-1ML-30min.M
Last changed   : 6/28/2019 8:29:21 AM by SYSTEM
Analysis Method : D:\ChemStation\1\Data\WFY\wfy-3-60\wfy-3-60-N-35Me 2019-10-21 09-16-11\OD-3
               : -90-10-1ML-30min.M (Sequence Method)
Last changed   : 11/14/2019 6:37:36 PM by SYSTEM
               : (modified after loading)
Additional Info : Peak(s) manually integrated
  
```

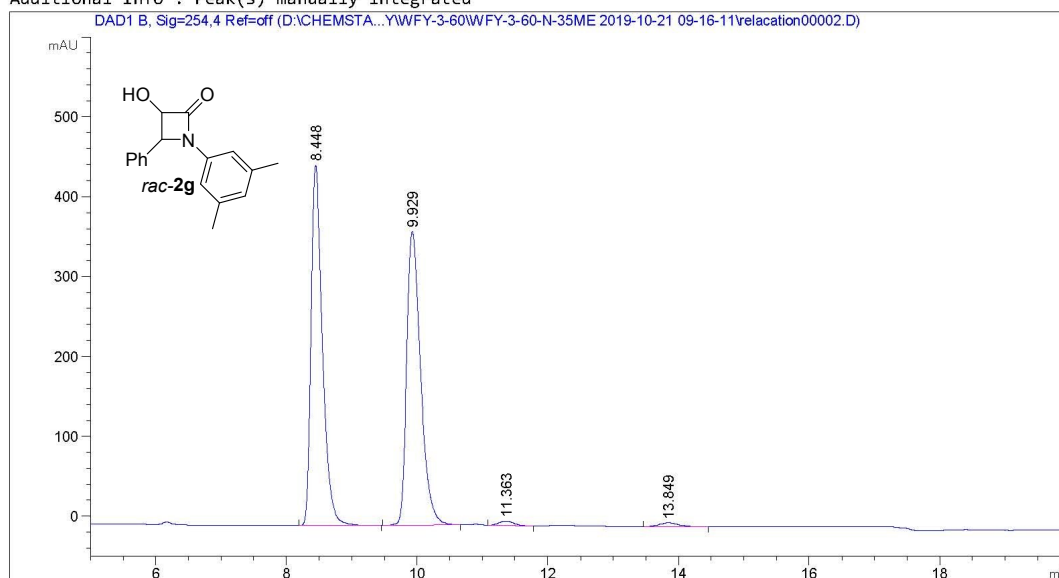

Area Percent Report

```

Sorted By      : Signal
Multiplier    : 1.0000
Dilution      : 1.0000
Use Multiplier & Dilution Factor with ISTDs
  
```

Signal 1: DAD1 B, Sig=254,4 Ref=off

| Peak # | RetTime [min] | Type | Width [min] | Area [mAU*s] | Height [mAU] | Area %  |
|--------|---------------|------|-------------|--------------|--------------|---------|
| 1      | 8.448         | BB   | 0.1855      | 5471.21289   | 451.12543    | 49.4161 |
| 2      | 9.929         | BB   | 0.2241      | 5422.83057   | 367.69009    | 48.9791 |
| 3      | 11.363        | BB   | 0.2457      | 88.44357     | 5.61560      | 0.7988  |

```

=====
Acq. Operator   : SYSTEM                      Seq. Line :    3
Sample Operator : SYSTEM
Acq. Instrument : LC                        Location  : P2-C-02
Injection Date  : 10/21/2019 9:58:16 AM      Inj       :    1
                                           Inj Volume: 1.000 µl
Different Inj Volume from Sample Entry! Actual Inj Volume : 5.000 µl
Acq. Method     : D:\ChemStation\1\Data\WFY\wfy-3-60\wfy-3-60-N-35Me 2019-10-21 09-16-11\OD-3
                  -90-10-1ML-30min.M
Last changed    : 6/28/2019 8:29:21 AM by SYSTEM
Analysis Method : D:\ChemStation\1\Data\WFY\wfy-3-60\wfy-3-60-N-35Me 2019-10-21 09-16-11\OD-3
                  -90-10-1ML-30min.M (Sequence Method)
Last changed    : 11/14/2019 6:39:01 PM by SYSTEM
                  (modified after loading)
Additional Info  : Peak(s) manually integrated
  
```

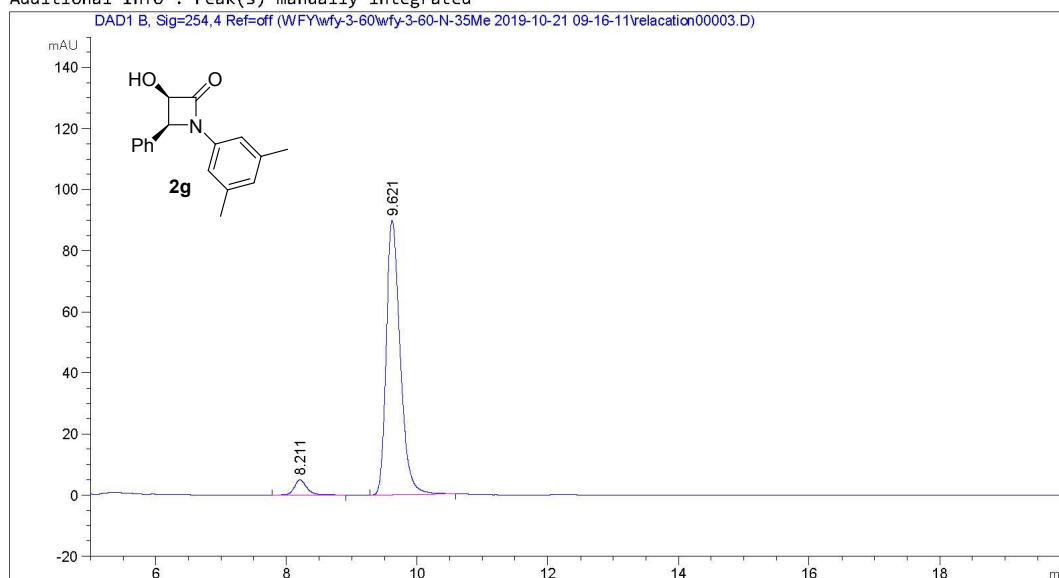

Area Percent Report

```

Sorted By      : Signal
Multiplier     : 1.0000
Dilution      : 1.0000
Use Multiplier & Dilution Factor with ISTDs
  
```

Signal 1: DAD1 B, Sig=254,4 Ref=off

| Peak # | RetTime [min] | Type | Width [min] | Area [mAU*s] | Height [mAU] | Area %  |
|--------|---------------|------|-------------|--------------|--------------|---------|
| 1      | 8.211         | BB   | 0.2059      | 68.27014     | 5.04445      | 4.8913  |
| 2      | 9.621         | BB   | 0.2264      | 1327.46912   | 89.83994     | 95.1087 |







```

=====
Acq. Operator   : SYSTEM                      Seq. Line :    4
Acq. Instrument : 1260-DAD                    Location  : P1-B-03
Injection Date  : 6/6/2019 11:01:58          Inj       :    1
                                           Inj Volume: 3.000 µl

Acq. Method    : D:\Chem32\1\Data\WFY\wfy-2-163\wfy-2-163-3 2019-06-06 09-43-58\IA-85-15-1ml
                -30min.M
Last changed   : 1/7/2019 21:25:37 by SYSTEM
Analysis Method : D:\Chem32\1\Data\WFY\wfy-2-163\wfy-2-163-3 2019-06-06 09-43-58\IA-85-15-1ml
                -30min.M (Sequence Method)
Last changed   : 12/18/2019 21:08:51 by SYSTEM
                (modified after loading)
Additional Info : Peak(s) manually integrated
  
```

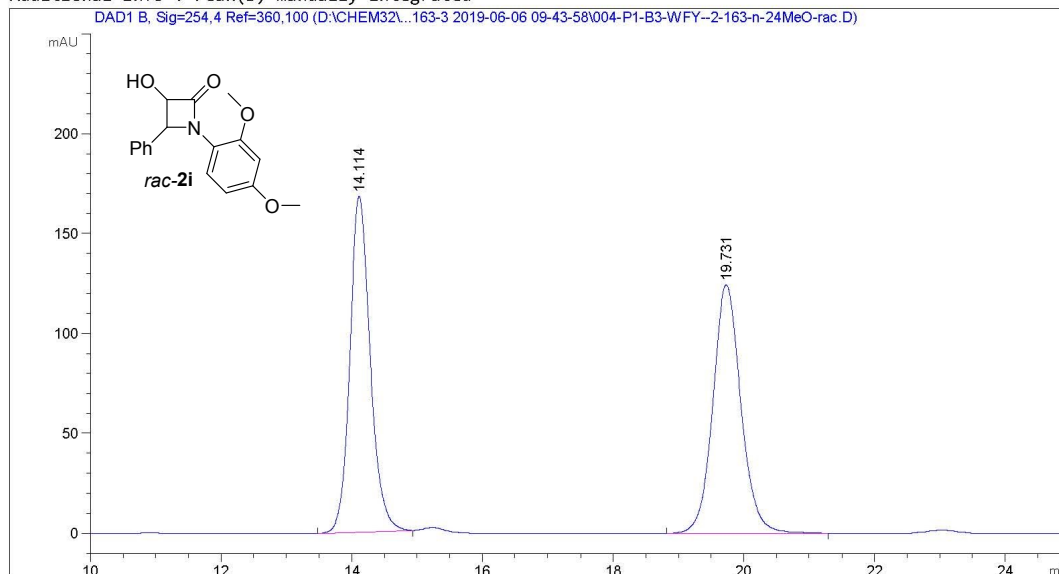

=====  
 Area Percent Report  
 =====

```

Sorted By      :      Signal
Multiplier     :      1.0000
Dilution      :      1.0000
Use Multiplier & Dilution Factor with ISTDs
  
```

Signal 1: DAD1 B, Sig=254,4 Ref=360,100

| Peak # | RetTime [min] | Type | Width [min] | Area [mAU*s] | Height [mAU] | Area %  |
|--------|---------------|------|-------------|--------------|--------------|---------|
| 1      | 14.114        | BB   | 0.3278      | 3626.81567   | 168.06200    | 49.5057 |
| 2      | 19.731        | BB   | 0.4550      | 3699.23828   | 124.36620    | 50.4943 |

Totals :                    7326.05396   292.42819

```

=====
Acq. Operator   : SYSTEM                      Seq. Line :    2
Acq. Instrument : 1260-DAD                    Location  : P1-B-04
Injection Date  : 6/6/2019 13:01:44          Inj       :    1
                                           Inj Volume: 3.000 µl
Different Inj Volume from Sample Entry! Actual Inj Volume : 10.000 µl
Acq. Method     : D:\Chem32\1\Data\WFY\wfy-2-163\wfy-2-163-24MeO 2019-06-06 12-45-27\IA-85-15
                  -1ml-30min.M
Last changed    : 1/7/2019 21:25:37 by SYSTEM
Analysis Method : D:\Chem32\1\Data\WFY\wfy-2-163\wfy-2-163-24MeO 2019-06-06 12-45-27\IA-85-15
                  -1ml-30min.M (Sequence Method)
Last changed    : 12/18/2019 21:07:20 by SYSTEM
                  (modified after loading)
Additional Info  : Peak(s) manually integrated
  
```

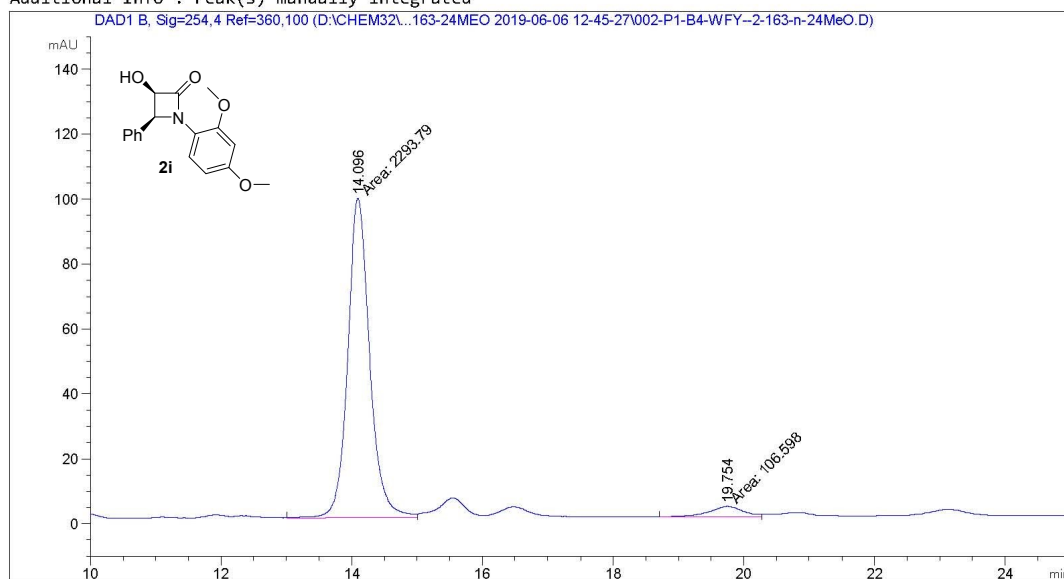

Area Percent Report

```

Sorted By      : Signal
Multiplier     : 1.0000
Dilution      : 1.0000
Use Multiplier & Dilution Factor with ISTDs
  
```

Signal 1: DAD1 B, Sig=254,4 Ref=360,100

| Peak # | RetTime [min] | Type | Width [min] | Area [mAU*s] | Height [mAU] | Area %  |
|--------|---------------|------|-------------|--------------|--------------|---------|
| 1      | 14.096        | MF   | 0.3885      | 2293.79004   | 98.40395     | 95.5591 |
| 2      | 19.754        | MF   | 0.5817      | 106.59768    | 3.05441      | 4.4409  |

Totals : 2400.38772 101.45835





=====

|                 |                                                                                                                         |                                         |                              |
|-----------------|-------------------------------------------------------------------------------------------------------------------------|-----------------------------------------|------------------------------|
| Acq. Operator   | : SYSTEM                                                                                                                | Seq. Line                               | : 10                         |
| Sample Operator | : SYSTEM                                                                                                                |                                         |                              |
| Acq. Instrument | : LC                                                                                                                    | Location                                | : P1-C-07                    |
| Injection Date  | : 11/16/2019 2:15:39 PM                                                                                                 | Inj                                     | : 1                          |
|                 |                                                                                                                         | Inj Volume                              | : 1.000 µl                   |
|                 |                                                                                                                         | Different Inj Volume from Sample Entry! | Actual Inj Volume : 5.000 µl |
| Acq. Method     | : D:\ChemStation\1\Data\Wfy\wfy-3-54\wfy-3-54-p-Br and CF3 2019-11-16 10-57-11\OD-3-90-10-1ML-30min.M                   |                                         |                              |
| Last changed    | : 11/16/2019 12:28:44 PM by SYSTEM                                                                                      |                                         |                              |
| Analysis Method | : D:\ChemStation\1\Data\Wfy\wfy-3-54\wfy-3-54-p-Br and CF3 2019-11-16 10-57-11\OD-3-90-10-1ML-30min.M (Sequence Method) |                                         |                              |
| Last changed    | : 11/19/2019 9:27:35 PM by SYSTEM                                                                                       |                                         |                              |
|                 | (modified after loading)                                                                                                |                                         |                              |

Additional Info : Peak(s) manually integrated

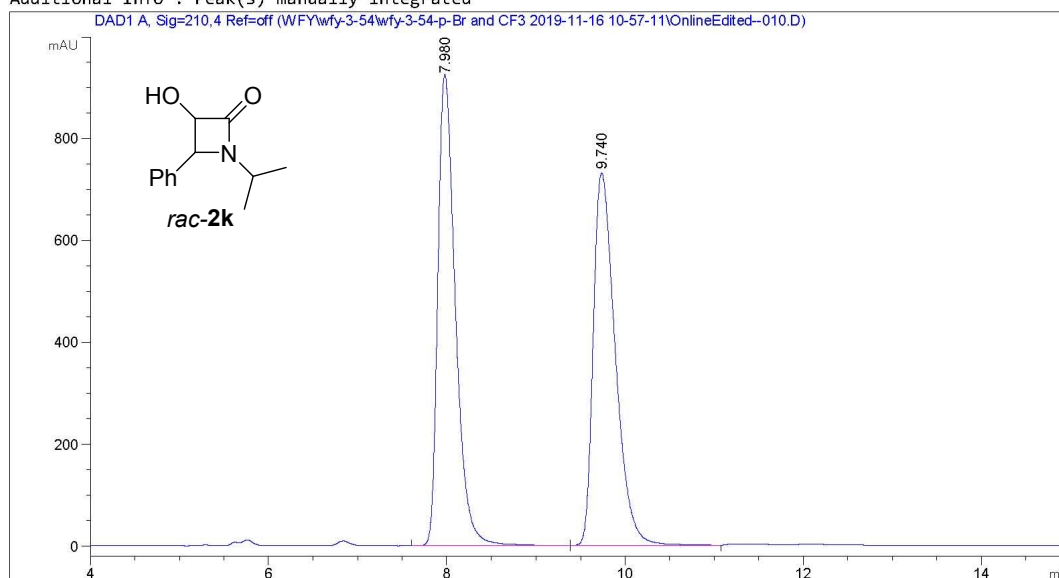

=====  
Area Percent Report  
=====

Sorted By : Signal  
Multiplier : 1.0000  
Dilution : 1.0000  
Use Multiplier & Dilution Factor with ISTDs

Signal 1: DAD1 A, Sig=210,4 Ref=off

| Peak # | RetTime [min] | Type | Width [min] | Area [mAU*s] | Height [mAU] | Area %  |
|--------|---------------|------|-------------|--------------|--------------|---------|
| 1      | 7.980         | BB   | 0.2087      | 1.25994e4    | 926.00726    | 50.2652 |
| 2      | 9.740         | BB   | 0.2628      | 1.24664e4    | 731.55688    | 49.7348 |

=====

|                                                                      |                                                                                                                         |            |            |
|----------------------------------------------------------------------|-------------------------------------------------------------------------------------------------------------------------|------------|------------|
| Acq. Operator                                                        | : SYSTEM                                                                                                                | Seq. Line  | : 11       |
| Sample Operator                                                      | : SYSTEM                                                                                                                |            |            |
| Acq. Instrument                                                      | : LC                                                                                                                    | Location   | : P1-C-08  |
| Injection Date                                                       | : 11/16/2019 2:36:33 PM                                                                                                 | Inj        | : 1        |
|                                                                      |                                                                                                                         | Inj Volume | : 1.000 µl |
| Different Inj Volume from Sample Entry! Actual Inj Volume : 8.000 µl |                                                                                                                         |            |            |
| Acq. Method                                                          | : D:\ChemStation\1\Data\Wfy\wfy-3-54\wfy-3-54-p-Br and CF3 2019-11-16 10-57-11\OD-3-90-10-1ML-30min.M                   |            |            |
| Last changed                                                         | : 11/16/2019 12:28:44 PM by SYSTEM                                                                                      |            |            |
| Analysis Method                                                      | : D:\ChemStation\1\Data\Wfy\wfy-3-54\wfy-3-54-p-Br and CF3 2019-11-16 10-57-11\OD-3-90-10-1ML-30min.M (Sequence Method) |            |            |
| Last changed                                                         | : 11/19/2019 9:28:29 PM by SYSTEM                                                                                       |            |            |
|                                                                      | (modified after loading)                                                                                                |            |            |

Additional Info : Peak(s) manually integrated

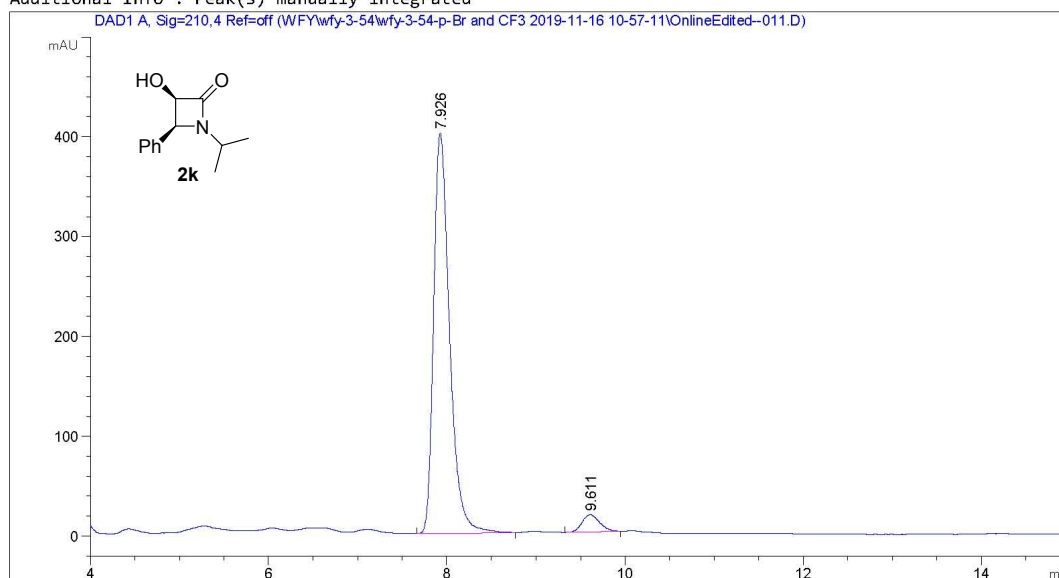

=====  
Area Percent Report  
=====

Sorted By : Signal  
Multiplier : 1.0000  
Dilution : 1.0000  
Use Multiplier & Dilution Factor with ISTDs

Signal 1: DAD1 A, Sig=210,4 Ref=off

| Peak # | RetTime [min] | Type | Width [min] | Area [mAU*s] | Height [mAU] | Area %  |
|--------|---------------|------|-------------|--------------|--------------|---------|
| 1      | 7.926         | BB   | 0.1880      | 4944.41602   | 400.47427    | 95.4395 |
| 2      | 9.611         | BB   | 0.2116      | 236.26707    | 17.26842     | 4.5605  |







```

=====
Acq. Operator   : SYSTEM                      Seq. Line :    8
Sample Operator : SYSTEM
Acq. Instrument : LC                        Location  : P1-C-05
Injection Date  : 11/16/2019 1:33:48 PM      Inj       :    1
                                           Inj Volume: 1.000 µl
Different Inj Volume from Sample Entry! Actual Inj Volume : 5.000 µl
Acq. Method     : D:\ChemStation\1\Data\Wfy\wfy-3-54\wfy-3-54-p-Br and CF3 2019-11-16 10-57-
                  11\OD-3-90-10-1ML-30min.M
Last changed    : 11/16/2019 12:28:44 PM by SYSTEM
Analysis Method : D:\ChemStation\1\Data\Wfy\wfy-3-54\wfy-3-54-p-Br and CF3 2019-11-16 10-57-
                  11\OD-3-90-10-1ML-30min.M (Sequence Method)
Last changed    : 11/19/2019 9:24:45 PM by SYSTEM
                  (modified after loading)
  
```

Additional Info : Peak(s) manually integrated

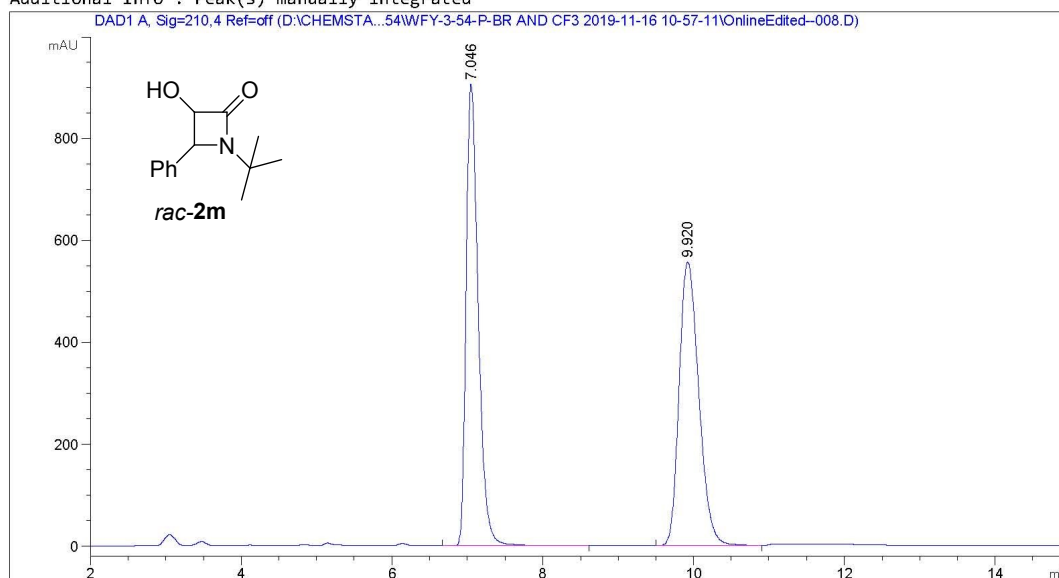

Area Percent Report

```

Sorted By      : Signal
Multiplier     : 1.0000
Dilution      : 1.0000
Use Multiplier & Dilution Factor with ISTDs
  
```

Signal 1: DAD1 A, Sig=210,4 Ref=off

| Peak # | RetTime [min] | Type | Width [min] | Area [mAU*s] | Height [mAU] | Area %  |
|--------|---------------|------|-------------|--------------|--------------|---------|
| 1      | 7.046         | BV R | 0.1718      | 1.00922e4    | 906.98041    | 50.1066 |
| 2      | 9.920         | BB   | 0.2826      | 1.00492e4    | 556.80591    | 49.8934 |



Data File D:\CHEM32\...-3-60\WfY-3-60 2019-10-21 10-19-44\002-P1-E1-WfY-3-60-PMP-PMP-RAC.D  
 Sample Name: WfY-3-60-PMP-PMP-RAC

```

=====
Acq. Operator   : SYSTEM                      Seq. Line :    2
Acq. Instrument : 1260-DAD                    Location  : P1-E-01
Injection Date  : 10/21/2019 10:35:59        Inj       :    1
                                                    Inj Volume: 3.000 µl

Acq. Method     : D:\Chem32\1\Data\WfY\WfY-3-60\wfy-3-60 2019-10-21 10-19-44\IA-85-15-1ml-
30min.M
Last changed    : 1/7/2019 21:25:37 by SYSTEM
Analysis Method : D:\Chem32\1\Data\WfY\WfY-3-60\wfy-3-60 2019-10-21 10-19-44\IA-85-15-1ml-
30min.M (Sequence Method)
Last changed    : 11/15/2019 16:15:32 by SYSTEM
(modified after loading)
Additional Info  : Peak(s) manually integrated
  
```

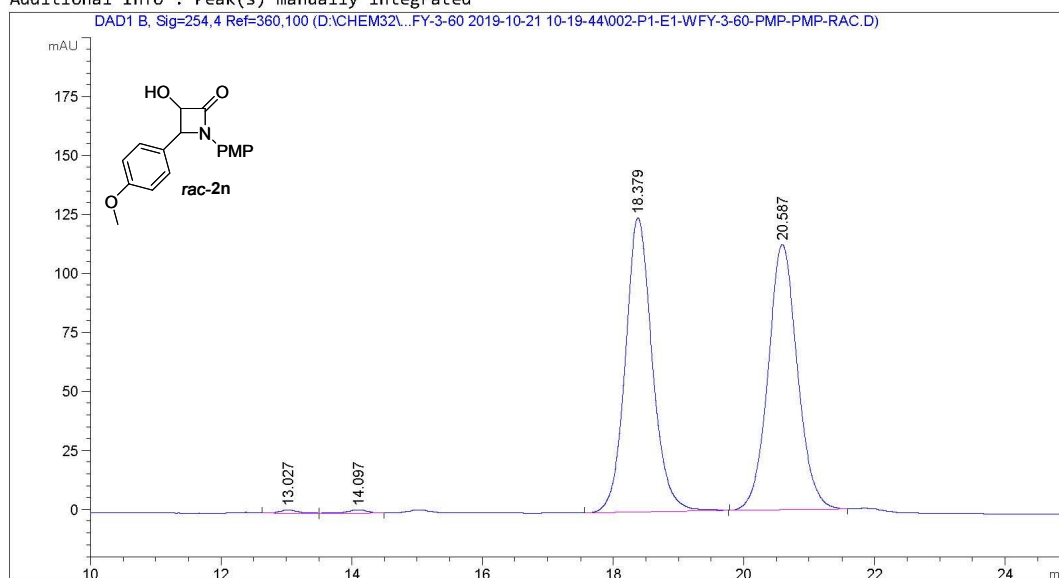

Area Percent Report

```

Sorted By      : Signal
Multiplier     : 1.0000
Dilution       : 1.0000
Use Multiplier & Dilution Factor with ISTDs
  
```

Signal 1: DAD1 B, Sig=254,4 Ref=360,100

| Peak # | RetTime [min] | Type | Width [min] | Area [mAU*s] | Height [mAU] | Area %  |
|--------|---------------|------|-------------|--------------|--------------|---------|
| 1      | 13.027        | BB   | 0.2796      | 24.73135     | 1.32593      | 0.3481  |
| 2      | 14.097        | BB   | 0.2996      | 26.97620     | 1.31347      | 0.3797  |
| 3      | 18.379        | BB   | 0.4339      | 3568.28564   | 124.67841    | 50.2229 |
| 4      | 20.587        | BB   | 0.4738      | 3484.90698   | 112.36911    | 49.0493 |

Data File D:\Chem32\...Y-3-60\wfy-3-60 2019-10-21 10-19-44\003-P1-E2-WFY-3-60-PMP-PMP-gh.D  
 Sample Name: WFY-3-60-PMP-PMP-gh

```

=====
Acq. Operator   : SYSTEM                      Seq. Line :    3
Acq. Instrument : 1260-DAD                    Location  : P1-E-02
Injection Date  : 10/21/2019 11:06:55        Inj       :    1
                                                Inj Volume: 3.000 µl
Different Inj Volume from Sample Entry! Actual Inj Volume : 10.000 µl
Acq. Method     : D:\Chem32\1\Data\WFY\WFY-3-60\wfy-3-60 2019-10-21 10-19-44\IA-85-15-1ml-30min.M
Last changed    : 1/7/2019 21:25:37 by SYSTEM
Analysis Method : D:\Chem32\1\Data\WFY\WFY-3-60\wfy-3-60 2019-10-21 10-19-44\IA-85-15-1ml-30min.M (Sequence Method)
Last changed    : 11/15/2019 16:15:32 by SYSTEM
                (modified after loading)
Additional Info  : Peak(s) manually integrated
  
```

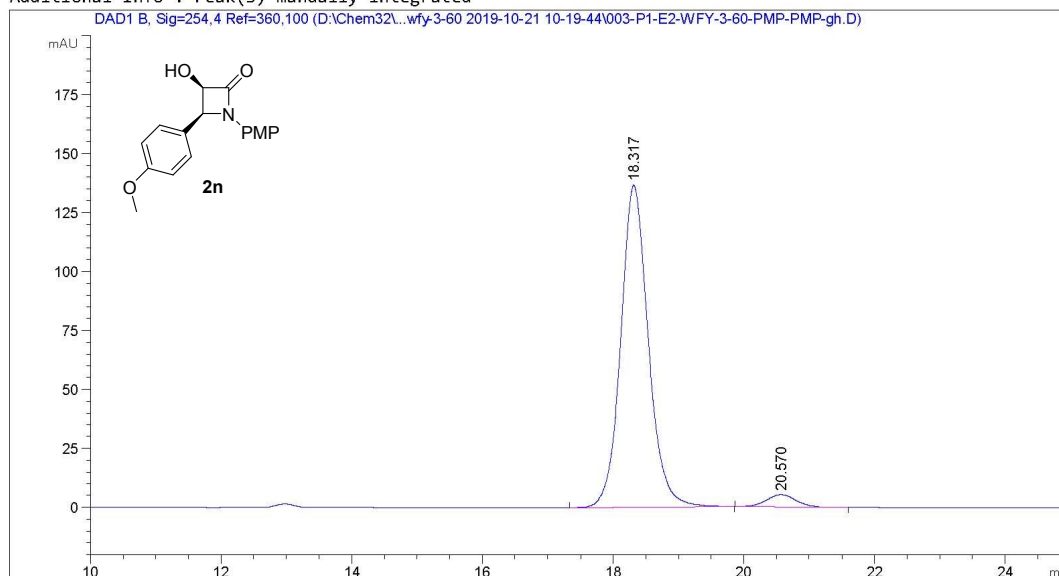

=====  
 Area Percent Report  
 =====

```

Sorted By      : Signal
Multiplier     : 1.0000
Dilution       : 1.0000
Use Multiplier & Dilution Factor with ISTDs
  
```

Signal 1: DAD1 B, Sig=254,4 Ref=360,100

| Peak # | RetTime [min] | Type | Width [min] | Area [mAU*s] | Height [mAU] | Area %  |
|--------|---------------|------|-------------|--------------|--------------|---------|
| 1      | 18.317        | BB   | 0.4438      | 4002.24438   | 136.59238    | 95.9853 |
| 2      | 20.570        | BB   | 0.4814      | 167.40054    | 5.28678      | 4.0147  |

Totals :                    4169.64493 141.87916







```
=====
Acq. Operator   : SYSTEM                      Seq. Line :    6
Sample Operator : SYSTEM
Acq. Instrument : LC                        Location  : P1-C-03
Injection Date  : 11/16/2019 12:52:00 PM      Inj       :    1
                                           Inj Volume: 1.000 µl
Different Inj Volume from Sample Entry! Actual Inj Volume : 5.000 µl
Acq. Method    : D:\ChemStation\1\Data\WFY\wfy-3-54\wfy-3-54-p-Br and CF3 2019-11-16 10-57-
11\OD-3-90-10-1ML-30min.M
Last changed   : 11/16/2019 12:28:44 PM by SYSTEM
Analysis Method : D:\ChemStation\1\Data\WFY\wfy-3-54\wfy-3-54-p-Br and CF3 2019-11-16 10-57-
11\OD-3-90-10-1ML-30min.M (Sequence Method)
Last changed   : 11/19/2019 9:07:39 PM by SYSTEM
                (modified after loading)
=====
```

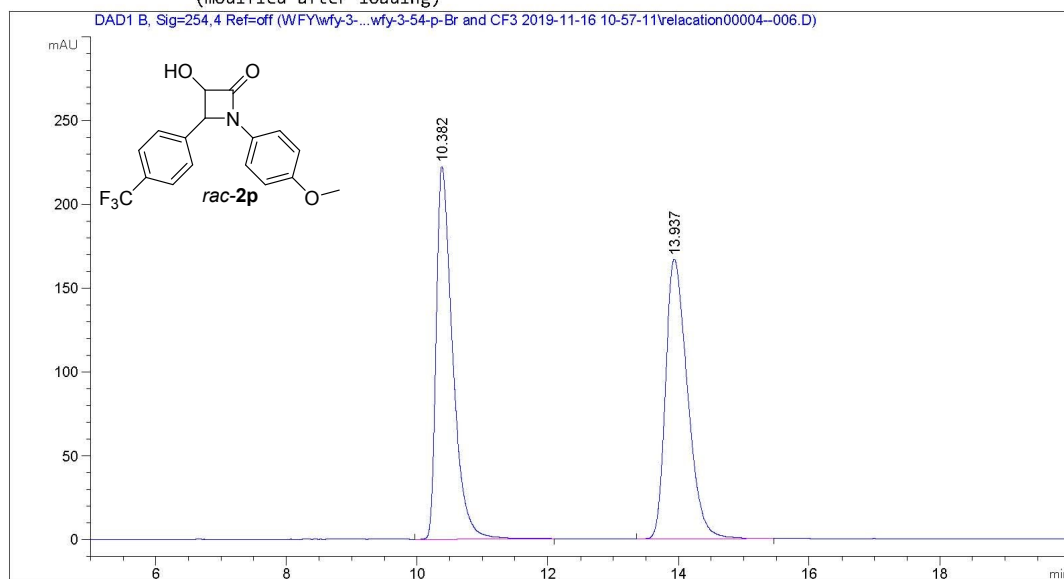

=====  
Area Percent Report  
=====

```
Sorted By      :      Signal
Multiplier     :      1.0000
Dilution       :      1.0000
Use Multiplier & Dilution Factor with ISTDs
```

Signal 1: DAD1 B, Sig=254,4 Ref=off

| Peak # | RetTime [min] | Type | Width [min] | Area [mAU*s] | Height [mAU] | Area %  |
|--------|---------------|------|-------------|--------------|--------------|---------|
| 1      | 3.044         | BB   | 0.1174      | 10.27355     | 1.23083      | 0.1320  |
| 2      | 10.382        | BB   | 0.2637      | 3887.44653   | 222.60713    | 49.9403 |
| 3      | 13.937        | BB   | 0.3457      | 3886.46045   | 166.89842    | 49.9277 |

```

=====
Acq. Operator   : SYSTEM                      Seq. Line :    7
Sample Operator : SYSTEM
Acq. Instrument : LC                        Location  : P1-C-04
Injection Date  : 11/16/2019 1:12:54 PM      Inj       :    1
                                           Inj Volume: 1.000 µl
Different Inj Volume from Sample Entry! Actual Inj Volume : 5.000 µl
Acq. Method     : D:\ChemStation\1\Data\WFY\wfy-3-54\wfy-3-54-p-Br and CF3 2019-11-16 10-57-
                  11\OD-3-90-10-1ML-30min.M
Last changed    : 11/16/2019 12:28:44 PM by SYSTEM
Analysis Method : D:\ChemStation\1\Data\WFY\wfy-3-54\wfy-3-54-p-Br and CF3 2019-11-16 10-57-
                  11\OD-3-90-10-1ML-30min.M (Sequence Method)
Last changed    : 11/19/2019 9:33:25 PM by SYSTEM
                  (modified after loading)
Additional Info : Peak(s) manually integrated
  
```

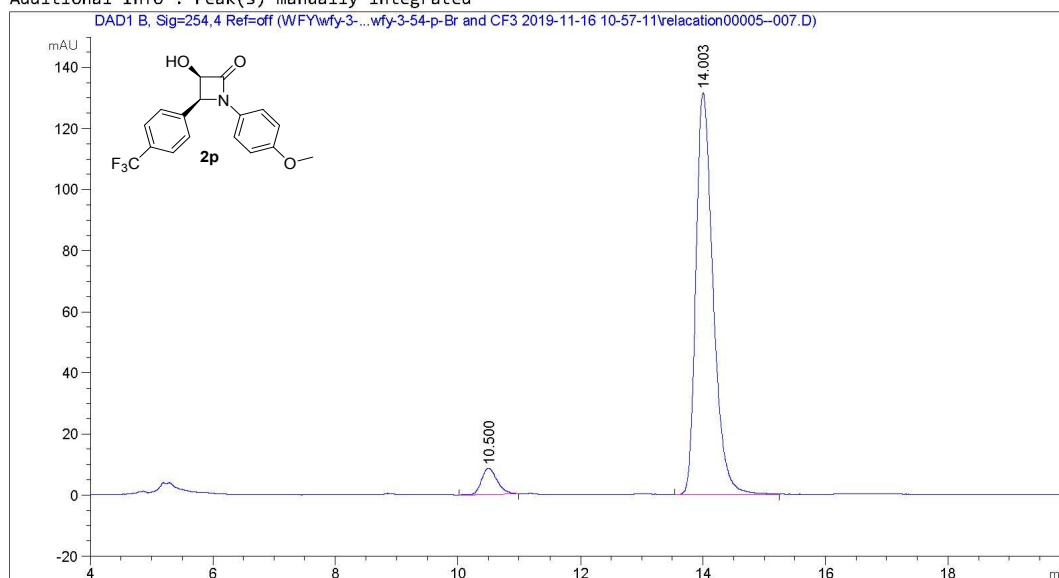

Area Percent Report

```

Sorted By      : Signal
Multiplier     : 1.0000
Dilution       : 1.0000
Use Multiplier & Dilution Factor with ISTDs
  
```

Signal 1: DAD1 B, Sig=254,4 Ref=off

| Peak # | RetTime [min] | Type | Width [min] | Area [mAU*s] | Height [mAU] | Area %  |
|--------|---------------|------|-------------|--------------|--------------|---------|
| 1      | 10.500        | BB   | 0.2656      | 149.71025    | 8.57843      | 5.5519  |
| 2      | 14.003        | BB   | 0.2980      | 2546.85449   | 131.45151    | 94.4481 |

Data File D:\Chem32\...3-54\wfy-3-54 2019-10-09 21-17-53\002-P1-E1-wfy-3-54-4Fph-pmp-rac.D  
 Sample Name: wfy-3-54-4Fph-pmp-rac

```

=====
Acq. Operator   : SYSTEM                      Seq. Line :    2
Acq. Instrument : 1260-DAD                   Location  : P1-E-01
Injection Date  : 10/9/2019 21:29:09        Inj       :    1
                                           Inj Volume: 3.000 µl

Acq. Method     : D:\Chem32\1\Data\Wfy\wfy-3-54\wfy-3-54 2019-10-09 21-17-53\IA-90-10-1.0ml-
                 30min.M
Last changed    : 7/24/2019 08:50:24 by SYSTEM
Analysis Method : D:\Chem32\1\Data\Wfy\wfy-3-54\wfy-3-54 2019-10-09 21-17-53\IA-90-10-1.0ml-
                 30min.M (Sequence Method)
Last changed    : 11/14/2019 18:51:36 by SYSTEM
                 (modified after loading)
Additional Info  : Peak(s) manually integrated
  
```

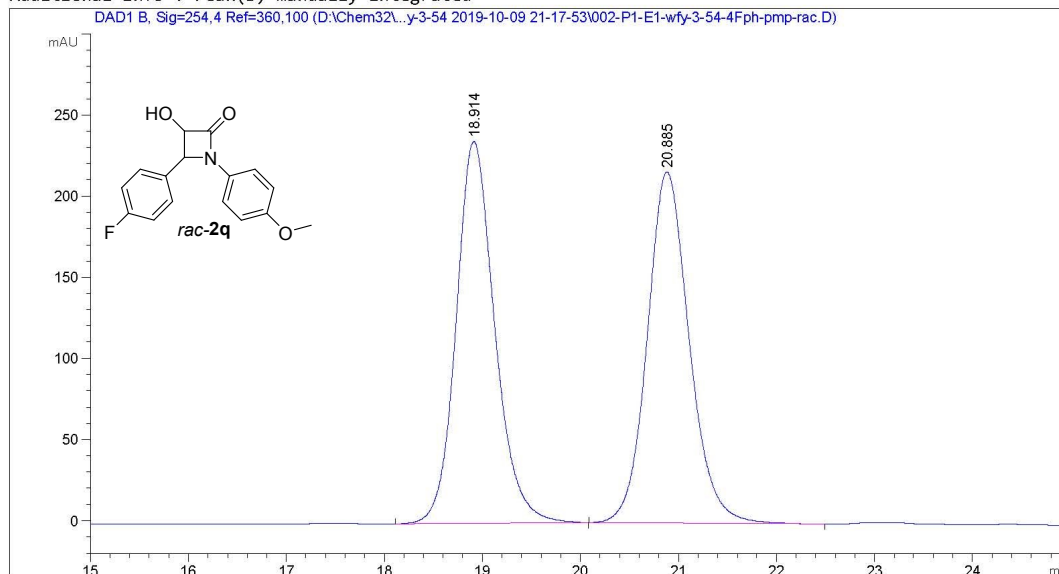

=====  
 Area Percent Report  
 =====

```

Sorted By      : Signal
Multiplier     : 1.0000
Dilution       : 1.0000
Use Multiplier & Dilution Factor with ISTDs
  
```

Signal 1: DAD1 B, Sig=254,4 Ref=360,100

| Peak # | RetTime [min] | Type | Width [min] | Area [mAU*s] | Height [mAU] | Area %  |
|--------|---------------|------|-------------|--------------|--------------|---------|
| 1      | 18.914        | BB   | 0.4141      | 6413.76074   | 235.21341    | 49.9667 |
| 2      | 20.885        | BB   | 0.4524      | 6422.32031   | 216.30305    | 50.0333 |

Totals :                    1.28361e4    451.51646

Data File D:\Chem32\...-3-54\wfy-3-54 2019-10-09 21-17-53\003-P1-E2-wfy-3-54-4Fph-pmp-gh.D  
 Sample Name: wfy-3-54-4Fph-pmp-gh

```

=====
Acq. Operator   : SYSTEM                      Seq. Line :    3
Acq. Instrument : 1260-DAD                    Location  : P1-E-02
Injection Date  : 10/9/2019 22:00:04         Inj       :    1
                                           Inj Volume: 3.000 µl
Different Inj Volume from Sample Entry! Actual Inj Volume : 5.000 µl
Acq. Method     : D:\Chem32\1\Data\Wfy\wfy-3-54\wfy-3-54 2019-10-09 21-17-53\IA-90-10-1.0ml-
                 30min.M
Last changed    : 7/24/2019 08:50:24 by SYSTEM
Analysis Method : D:\Chem32\1\Data\Wfy\wfy-3-54\wfy-3-54 2019-10-09 21-17-53\IA-90-10-1.0ml-
                 30min.M (Sequence Method)
Last changed    : 11/14/2019 18:52:03 by SYSTEM
                 (modified after loading)
Additional Info : Peak(s) manually integrated
  
```

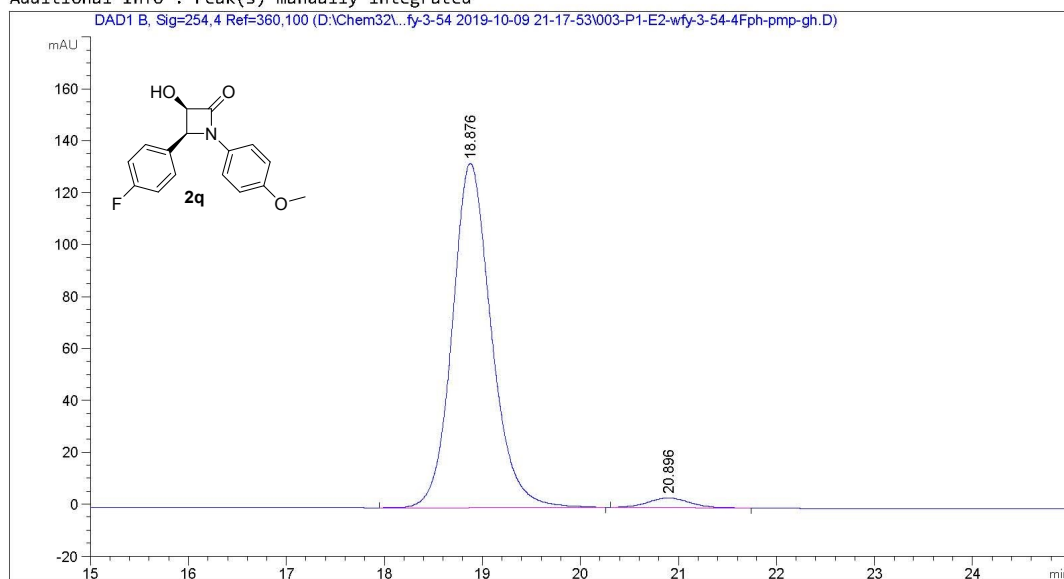

Area Percent Report

```

Sorted By      : Signal
Multiplier     : 1.0000
Dilution      : 1.0000
Use Multiplier & Dilution Factor with ISTDs
  
```

Signal 1: DAD1 B, Sig=254,4 Ref=360,100

| Peak # | RetTime [min] | Type | Width [min] | Area [mAU*s] | Height [mAU] | Area %  |
|--------|---------------|------|-------------|--------------|--------------|---------|
| 1      | 18.876        | BB   | 0.4200      | 3659.78003   | 132.60747    | 97.1604 |
| 2      | 20.896        | BB   | 0.4458      | 106.95877    | 3.67228      | 2.8396  |

Totals : 3766.73880 136.27974

Data File D:\Chem32\...-54\wfy-3-54 2019-10-09 21-17-53\004-P1-E3-wfy-3-54-4Clph-pmp-rac.D  
 Sample Name: wfy-3-54-4Clph-pmp-rac

```

=====
Acq. Operator   : SYSTEM                      Seq. Line :    4
Acq. Instrument : 1260-DAD                    Location  : P1-E-03
Injection Date  : 10/9/2019 22:30:58         Inj       :    1
                                           Inj Volume: 3.000 µl

Acq. Method     : D:\Chem32\1\Data\Wfy\wfy-3-54\wfy-3-54 2019-10-09 21-17-53\IA-90-10-1.0ml-
                 30min.M
Last changed    : 7/24/2019 08:50:24 by SYSTEM
Analysis Method : D:\Chem32\1\Data\Wfy\wfy-3-54\wfy-3-54 2019-10-09 21-17-53\IA-90-10-1.0ml-
                 30min.M (Sequence Method)
Last changed    : 11/14/2019 18:53:01 by SYSTEM
                 (modified after loading)
Additional Info  : Peak(s) manually integrated
  
```

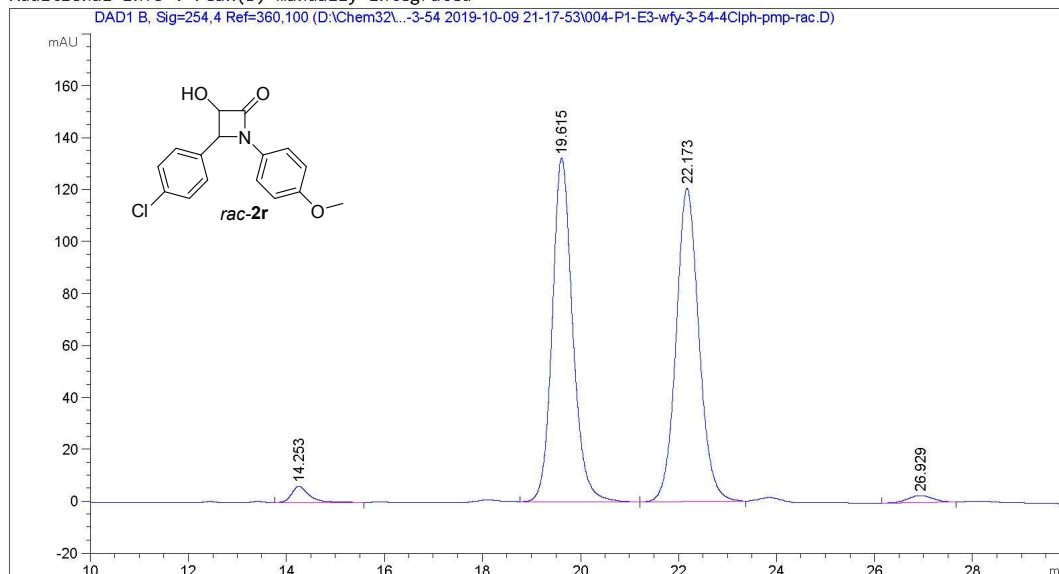

=====  
 Area Percent Report  
 =====

```

Sorted By      : Signal
Multiplier     : 1.0000
Dilution       : 1.0000
Use Multiplier & Dilution Factor with ISTDs
  
```

Signal 1: DAD1 B, Sig=254,4 Ref=360,100

| Peak # | RetTime [min] | Type | Width [min] | Area [mAU*s] | Height [mAU] | Area %  |
|--------|---------------|------|-------------|--------------|--------------|---------|
| 1      | 14.253        | BB   | 0.3633      | 151.60417    | 6.15692      | 1.9001  |
| 2      | 19.615        | BB   | 0.4403      | 3837.85669   | 132.36440    | 48.1020 |
| 3      | 22.173        | BB   | 0.4924      | 3893.10571   | 120.66217    | 48.7944 |
| 4      | 26.929        | BB   | 0.5075      | 96.01798     | 2.73532      | 1.2034  |

Data File D:\Chem32\...3-54\wfy-3-54 2019-10-09 21-17-53\005-P1-E4-wfy-3-54-4Clph-pmp-gh.D  
 Sample Name: wfy-3-54-4Clph-pmp-gh

```

=====
Acq. Operator   : SYSTEM                      Seq. Line :    5
Acq. Instrument : 1260-DAD                    Location  : P1-E-04
Injection Date  : 10/9/2019 23:01:54         Inj       :    1
                                           Inj Volume: 3.000 µl
Different Inj Volume from Sample Entry! Actual Inj Volume : 5.000 µl
Acq. Method     : D:\Chem32\1\Data\WfY\wfy-3-54\wfy-3-54 2019-10-09 21-17-53\IA-90-10-1.0ml-
                 30min.M
Last changed    : 7/24/2019 08:50:24 by SYSTEM
Analysis Method : D:\Chem32\1\Data\WfY\wfy-3-54\wfy-3-54 2019-10-09 21-17-53\IA-90-10-1.0ml-
                 30min.M (Sequence Method)
Last changed    : 11/14/2019 18:54:22 by SYSTEM
                 (modified after loading)
Additional Info : Peak(s) manually integrated
  
```

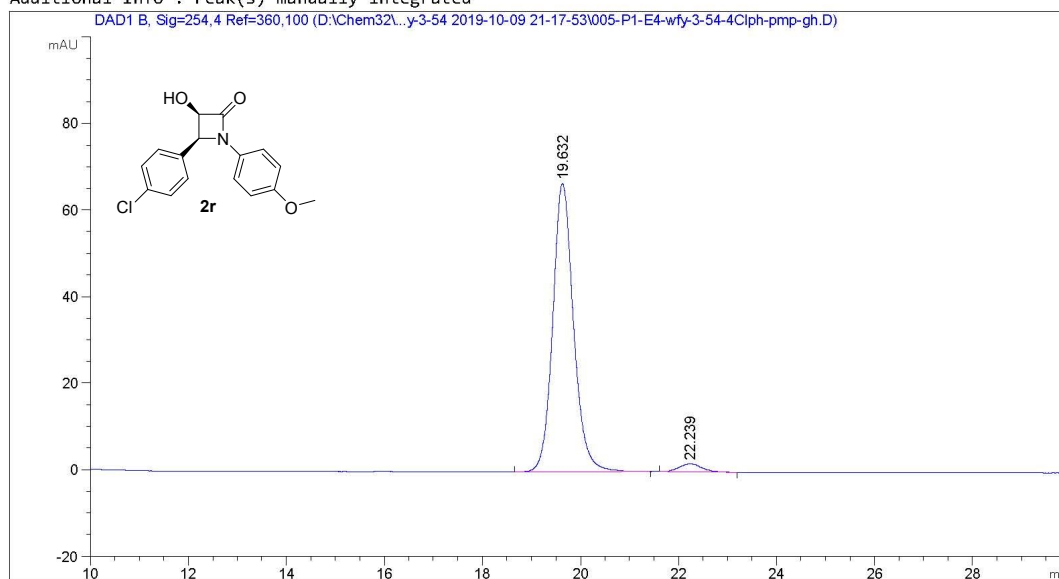

Area Percent Report

```

Sorted By      :      Signal
Multiplier     :      1.0000
Dilution       :      1.0000
Use Multiplier & Dilution Factor with ISTDs
  
```

Signal 1: DAD1 B, Sig=254,4 Ref=360,100

| Peak # | RetTime [min] | Type | Width [min] | Area [mAU*s] | Height [mAU] | Area %  |
|--------|---------------|------|-------------|--------------|--------------|---------|
| 1      | 19.632        | BB   | 0.4484      | 1965.79492   | 66.59377     | 97.0672 |
| 2      | 22.239        | BB   | 0.4506      | 59.39445     | 1.87994      | 2.9328  |

Totals :                    2025.18938   68.47372

```

=====
Acq. Operator   : SYSTEM                      Seq. Line :    4
Sample Operator : SYSTEM
Acq. Instrument : LC                        Location  : P1-C-01
Injection Date  : 11/16/2019 12:10:12 PM    Inj       :    1
                                           Inj Volume: 1.000 µl
Different Inj Volume from Sample Entry! Actual Inj Volume : 10.000 µl
Acq. Method     : D:\ChemStation\1\Data\WFY\wfy-3-54\wfy-3-54-p-Br and CF3 2019-11-16 10-57-
                  11\OD-3-90-10-1ML-30min.M
Last changed    : 11/16/2019 12:28:44 PM by SYSTEM
                  (modified after loading)
Analysis Method : D:\ChemStation\1\Data\WFY\wfy-3-54\wfy-3-54-p-Br and CF3 2019-11-16 10-57-
                  11\OD-3-90-10-1ML-30min.M (Sequence Method)
Last changed    : 11/19/2019 9:05:48 PM by SYSTEM
                  (modified after loading)
Additional Info : Peak(s) manually integrated
  
```

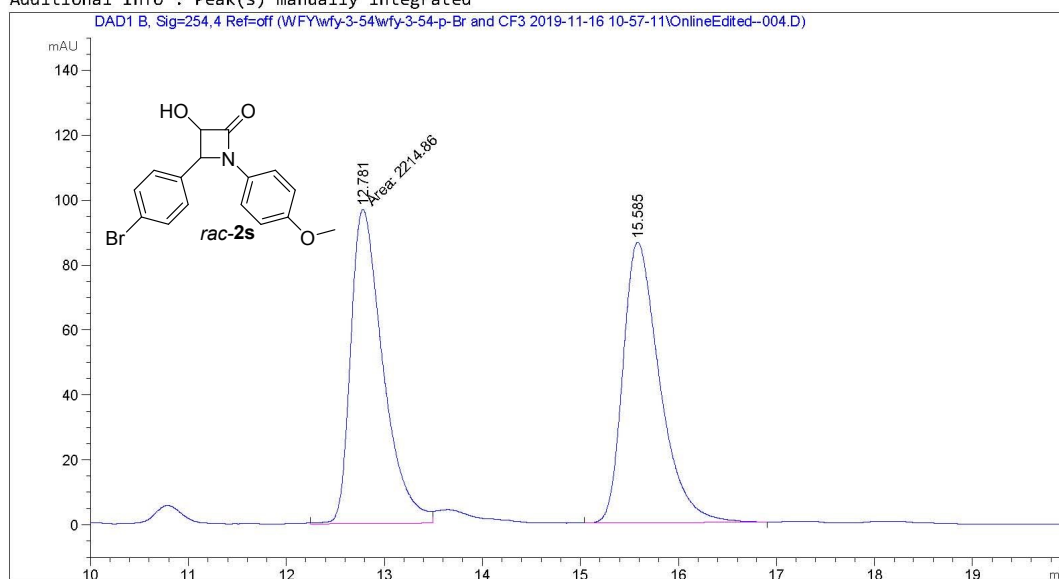

Area Percent Report

```

Sorted By      : Signal
Multiplier     : 1.0000
Dilution       : 1.0000
Use Multiplier & Dilution Factor with ISTDs
  
```

Signal 1: DAD1 B, Sig=254,4 Ref=off

| Peak # | RetTime [min] | Type | Width [min] | Area [mAU*s] | Height [mAU] | Area %  |
|--------|---------------|------|-------------|--------------|--------------|---------|
| 1      | 12.781        | MM   | 0.3814      | 2214.85864   | 96.79659     | 49.6119 |
| 2      | 15.585        | BB   | 0.3958      | 2249.51392   | 86.39938     | 50.3881 |

```

=====
Acq. Operator   : SYSTEM                      Seq. Line :    5
Sample Operator : SYSTEM
Acq. Instrument : LC                        Location  : P1-C-02
Injection Date  : 11/16/2019 12:31:06 PM    Inj       :    1
                                           Inj Volume: 1.000 µl
Different Inj Volume from Sample Entry! Actual Inj Volume : 3.000 µl
Acq. Method     : D:\ChemStation\1\Data\Wfy\wfy-3-54\wfy-3-54-p-Br and CF3 2019-11-16 10-57-
                  11\OD-3-90-10-1ML-30min.M
Last changed    : 11/16/2019 12:28:44 PM by SYSTEM
Analysis Method : D:\ChemStation\1\Data\Wfy\wfy-3-54\wfy-3-54-p-Br and CF3 2019-11-16 10-57-
                  11\OD-3-90-10-1ML-30min.M (Sequence Method)
Last changed    : 11/19/2019 9:04:36 PM by SYSTEM
                  (modified after loading)
Additional Info : Peak(s) manually integrated
  
```

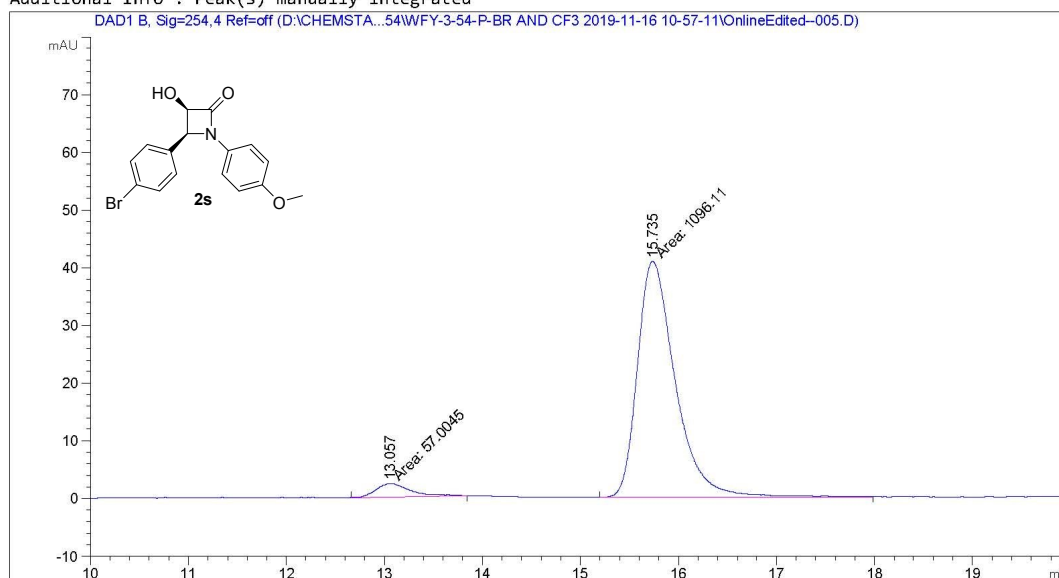

Area Percent Report

```

Sorted By      : Signal
Multiplier     : 1.0000
Dilution       : 1.0000
Use Multiplier & Dilution Factor with ISTDs
  
```

Signal 1: DAD1 B, Sig=254,4 Ref=off

| Peak # | RetTime [min] | Type | Width [min] | Area [mAU*s] | Height [mAU] | Area %  |
|--------|---------------|------|-------------|--------------|--------------|---------|
| 1      | 13.057        | MM   | 0.4088      | 57.00448     | 2.32401      | 4.9435  |
| 2      | 15.735        | MM   | 0.4467      | 1096.11255   | 40.89233     | 95.0565 |



=====

|                 |                      |            |            |
|-----------------|----------------------|------------|------------|
| Acq. Operator   | : SYSTEM             | Seq. Line  | : 2        |
| Acq. Instrument | : 1260-DAD           | Location   | : P2-D-01  |
| Injection Date  | : 10/8/2020 16:28:13 | Inj        | : 1        |
|                 |                      | Inj Volume | : 3.000 µl |

Different Inj Volume from Sample Entry! Actual Inj Volume : 5.000 µl

|                 |                                                                                                               |
|-----------------|---------------------------------------------------------------------------------------------------------------|
| Acq. Method     | : D:\Chem32\1\Data\WfY\wfy-4-paper2\Nipr-pmp-rac-2 2020-10-08 16-21-55\IA-85-15-1ml-30min.M                   |
| Last changed    | : 1/7/2019 21:25:37 by SYSTEM                                                                                 |
| Analysis Method | : d:\Chem32\1\Data\WfY\wfy-4-paper2\Nipr-pmp-rac-2 2020-10-08 16-21-55\IA-85-15-1ml-30min.M (Sequence Method) |
| Last changed    | : 10/9/2020 08:54:53 by SYSTEM<br>(modified after loading)                                                    |

Additional Info : Peak(s) manually integrated

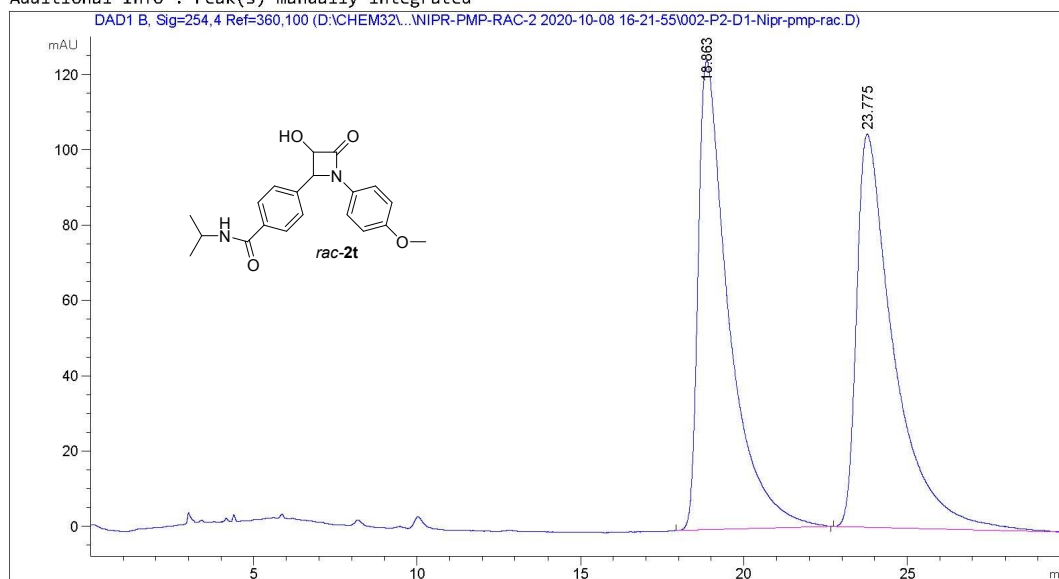

=====  
Area Percent Report  
=====

Sorted By : Signal  
Multiplier : 1.0000  
Dilution : 1.0000  
Use Multiplier & Dilution Factor with ISTDs

Signal 1: DAD1 B, Sig=254,4 Ref=360,100

| Peak # | RetTime [min] | Type | Width [min] | Area [mAU*s] | Height [mAU] | Area %  |
|--------|---------------|------|-------------|--------------|--------------|---------|
| 1      | 18.863        | BB   | 0.9134      | 8067.21631   | 124.59436    | 49.5297 |
| 2      | 23.775        | BBA  | 1.1272      | 8220.42383   | 104.33062    | 50.4703 |

Totals : 1.62876e4 228.92498

```

=====
Acq. Operator   : SYSTEM                      Seq. Line :    3
Acq. Instrument : 1260-DAD                    Location  : P2-D-04
Injection Date  : 10/8/2020 15:14:01         Inj       :    1
                                           Inj Volume: 3.000 µl
Different Inj Volume from Sample Entry! Actual Inj Volume : 8.000 µl
Acq. Method    : D:\Chem32\1\Data\WfY\wfy-4-paper2\Nipr-pmp-gh 2020-10-08 14-31-54\IA-85-15-
                1ml-30min.M
Last changed   : 1/7/2019 21:25:37 by SYSTEM
Analysis Method : D:\Chem32\1\Data\WfY\wfy-4-paper2\Nipr-pmp-gh 2020-10-08 14-31-54\IA-85-15-
                1ml-30min.M (Sequence Method)
Last changed   : 10/8/2020 16:20:01 by SYSTEM
                (modified after loading)
Additional Info : Peak(s) manually integrated
  
```

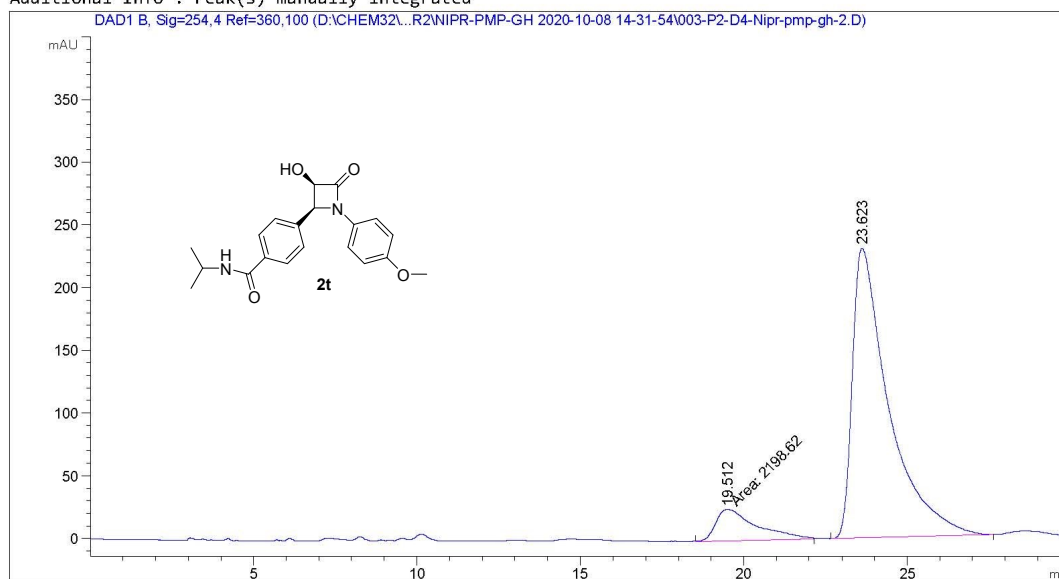

Area Percent Report

```

Sorted By      : Signal
Multiplier     : 1.0000
Dilution       : 1.0000
Use Multiplier & Dilution Factor with ISTDs
  
```

Signal 1: DAD1 B, Sig=254,4 Ref=360,100

| Peak # | RetTime [min] | Type | Width [min] | Area [mAU*s] | Height [mAU] | Area %  |
|--------|---------------|------|-------------|--------------|--------------|---------|
| 1      | 19.512        | MM   | 1.4493      | 2198.61914   | 25.28300     | 10.9829 |
| 2      | 23.623        | BB   | 1.0702      | 1.78199e4    | 230.95465    | 89.0171 |

Totals :                    2.00185e4    256.23765

Data File D:\Chem32\...3-60\wfy-3-60 2019-10-21 10-19-44\004-P1-E3-WFY-3-60-3MeO-PMP-rac.D  
 Sample Name: WFY-3-60-3MeO-PMP-rac

```

=====
Acq. Operator   : SYSTEM                      Seq. Line :    4
Acq. Instrument : 1260-DAD                    Location  : P1-E-03
Injection Date  : 10/21/2019 11:37:51        Inj       :    1
                                           Inj Volume: 3.000 µl

Acq. Method     : D:\Chem32\1\Data\WFY\WFY-3-60\wfy-3-60 2019-10-21 10-19-44\IA-85-15-1ml-
30min.M
Last changed    : 1/7/2019 21:25:37 by SYSTEM
Analysis Method : D:\Chem32\1\Data\WFY\WFY-3-60\wfy-3-60 2019-10-21 10-19-44\IA-85-15-1ml-
30min.M (Sequence Method)
Last changed    : 11/15/2019 16:17:57 by SYSTEM
                 (modified after loading)

Additional Info : Peak(s) manually integrated
  
```

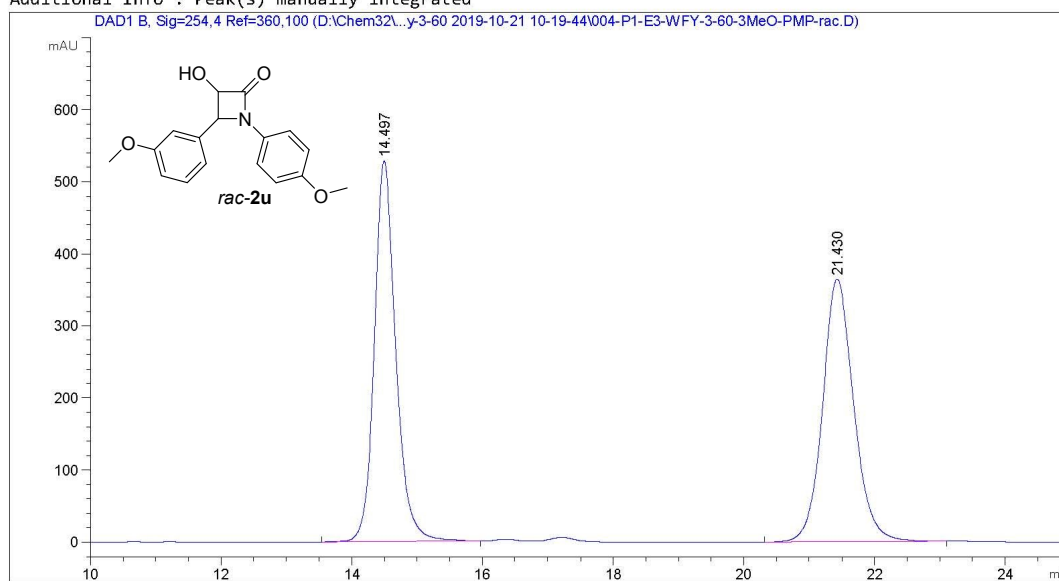

Area Percent Report

```

Sorted By      : Signal
Multiplier     : 1.0000
Dilution       : 1.0000
Use Multiplier & Dilution Factor with ISTDs
  
```

Signal 1: DAD1 B, Sig=254,4 Ref=360,100

| Peak # | RetTime [min] | Type | Width [min] | Area [mAU*s] | Height [mAU] | Area %  |
|--------|---------------|------|-------------|--------------|--------------|---------|
| 1      | 14.497        | BB   | 0.3409      | 1.19822e4    | 527.68707    | 49.9497 |
| 2      | 21.430        | BB   | 0.5007      | 1.20064e4    | 364.09576    | 50.0503 |

Totals :                                    2.39886e4    891.78284

Data File D:\Chem32\...-3-60\wfy-3-60 2019-10-21 10-19-44\005-P1-E4-WFY-3-60-3MeO-PMP-gh.D  
 Sample Name: WFY-3-60-3MeO-PMP-gh

```

=====
Acq. Operator   : SYSTEM                      Seq. Line :    5
Acq. Instrument : 1260-DAD                    Location  : P1-E-04
Injection Date  : 10/21/2019 12:08:47        Inj       :    1
                                           Inj Volume: 3.000 µl
Different Inj Volume from Sample Entry! Actual Inj Volume : 10.000 µl
Acq. Method     : D:\Chem32\1\Data\WFY\WFY-3-60\wfy-3-60 2019-10-21 10-19-44\IA-85-15-1ml-
                                           30min.M
Last changed    : 1/7/2019 21:25:37 by SYSTEM
Analysis Method : D:\Chem32\1\Data\WFY\WFY-3-60\wfy-3-60 2019-10-21 10-19-44\IA-85-15-1ml-
                                           30min.M (Sequence Method)
Last changed    : 11/15/2019 16:18:37 by SYSTEM
                                           (modified after loading)
Additional Info  : Peak(s) manually integrated
  
```

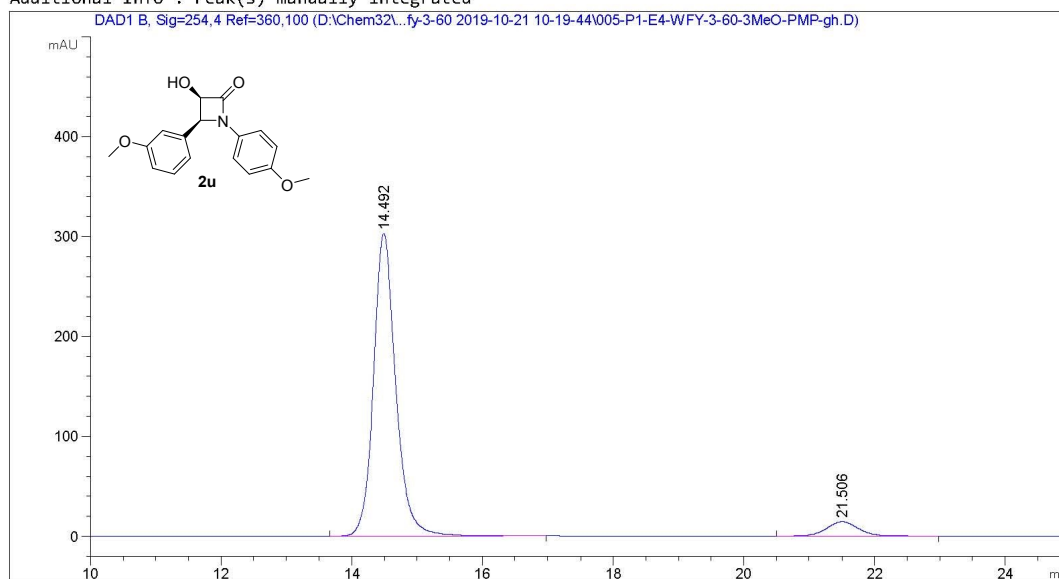

Area Percent Report

```

Sorted By      : Signal
Multiplier     : 1.0000
Dilution       : 1.0000
Use Multiplier & Dilution Factor with ISTDs
  
```

Signal 1: DAD1 B, Sig=254,4 Ref=360,100

| Peak # | RetTime [min] | Type | Width [min] | Area [mAU*s] | Height [mAU] | Area %  |
|--------|---------------|------|-------------|--------------|--------------|---------|
| 1      | 14.492        | BB   | 0.3559      | 7166.12158   | 302.98111    | 93.4674 |
| 2      | 21.506        | BB   | 0.5172      | 500.85095    | 14.63854     | 6.5326  |

Totals : 7666.97253 317.61965

Data File D:\Chem32\...3-60\wfy-3-60 2019-10-21 10-19-44\006-P1-E5-WFY-3-60-2MeO-PMP-rac.D  
 Sample Name: WFY-3-60-2MeO-PMP-rac

```

=====
Acq. Operator   : SYSTEM                      Seq. Line :    6
Acq. Instrument : 1260-DAD                    Location  : P1-E-05
Injection Date  : 10/21/2019 12:39:44        Inj       :    1
                                           Inj Volume: 3.000 µl

Acq. Method     : D:\Chem32\1\Data\WFY\WFY-3-60\wfy-3-60 2019-10-21 10-19-44\IA-85-15-1ml-
                                           30min.M
Last changed    : 1/7/2019 21:25:37 by SYSTEM
Analysis Method : D:\Chem32\1\Data\WFY\WFY-3-60\wfy-3-60 2019-10-21 10-19-44\IA-85-15-1ml-
                                           30min.M (Sequence Method)
Last changed    : 11/15/2019 16:20:12 by SYSTEM
                                           (modified after loading)
Additional Info  : Peak(s) manually integrated
  
```

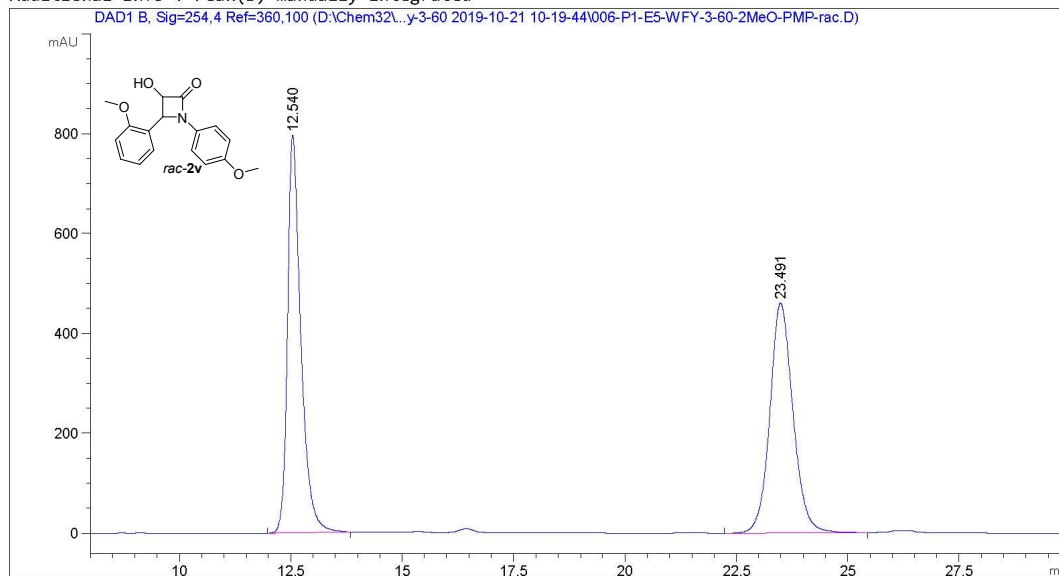

=====  
 Area Percent Report  
 =====

```

Sorted By      :      Signal
Multiplier     :      1.0000
Dilution      :      1.0000
Use Multiplier & Dilution Factor with ISTDs
  
```

Signal 1: DAD1 B, Sig=254,4 Ref=360,100

| Peak # | RetTime [min] | Type | Width [min] | Area [mAU*s] | Height [mAU] | Area %  |
|--------|---------------|------|-------------|--------------|--------------|---------|
| 1      | 12.540        | BB   | 0.3067      | 1.64155e4    | 795.71454    | 49.7787 |
| 2      | 23.491        | BB   | 0.5459      | 1.65615e4    | 460.17523    | 50.2213 |

Totals :                                    3.29771e4  1255.88977











=====

|                                                                      |                                                                                                                                  |            |            |
|----------------------------------------------------------------------|----------------------------------------------------------------------------------------------------------------------------------|------------|------------|
| Acq. Operator                                                        | : SYSTEM                                                                                                                         | Seq. Line  | : 4        |
| Sample Operator                                                      | : SYSTEM                                                                                                                         |            |            |
| Acq. Instrument                                                      | : LC                                                                                                                             | Location   | : P2-C-03  |
| Injection Date                                                       | : 10/16/2019 1:53:26 PM                                                                                                          | Inj        | : 1        |
|                                                                      |                                                                                                                                  | Inj Volume | : 1.000 µl |
| Different Inj Volume from Sample Entry! Actual Inj Volume : 5.000 µl |                                                                                                                                  |            |            |
| Acq. Method                                                          | : D:\ChemStation\1\Data\WFY\wfy-3-54\wfy-3-54-saifen~cyclohexane 2019-10-16<br>12-40-28\OD-3-90-10-1ML-30min.M                   |            |            |
| Last changed                                                         | : 6/28/2019 8:29:21 AM by SYSTEM                                                                                                 |            |            |
| Analysis Method                                                      | : D:\ChemStation\1\Data\WFY\wfy-3-54\wfy-3-54-saifen~cyclohexane 2019-10-16<br>12-40-28\OD-3-90-10-1ML-30min.M (Sequence Method) |            |            |
| Last changed                                                         | : 11/14/2019 2:39:57 PM by SYSTEM                                                                                                |            |            |
|                                                                      | (modified after loading)                                                                                                         |            |            |

Additional Info : Peak(s) manually integrated

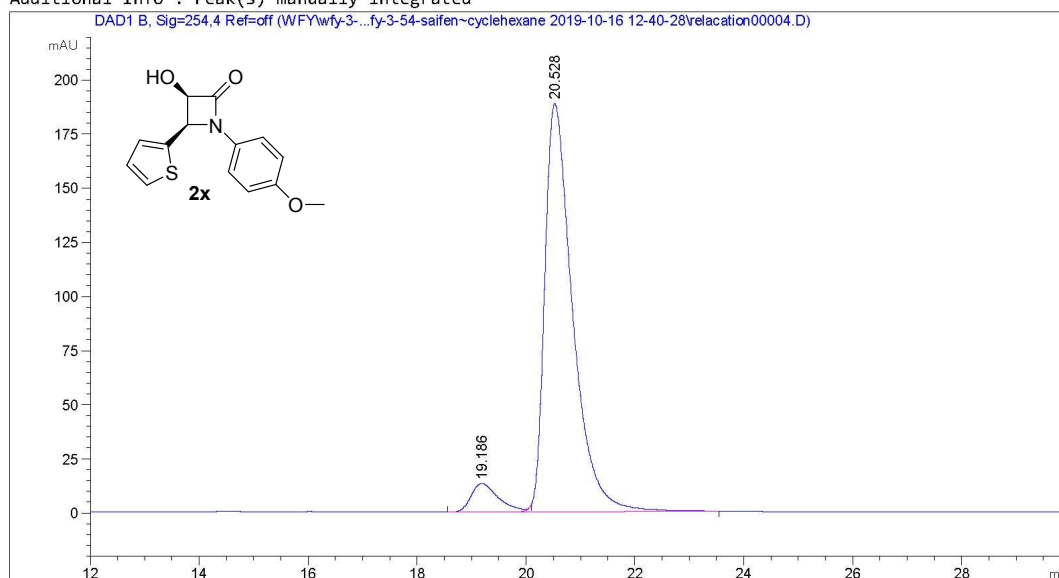

=====  
Area Percent Report  
=====

Sorted By : Signal  
Multiplier : 1.0000  
Dilution : 1.0000  
Use Multiplier & Dilution Factor with ISTDs

Signal 1: DAD1 B, Sig=254,4 Ref=off

| Peak # | RetTime [min] | Type | Width [min] | Area [mAU*s] | Height [mAU] | Area %  |
|--------|---------------|------|-------------|--------------|--------------|---------|
| 1      | 19.186        | BV E | 0.5213      | 453.74026    | 13.12718     | 6.3606  |
| 2      | 20.528        | VB R | 0.5354      | 6679.85205   | 188.52869    | 93.6394 |

Data File D:\CHEM32\...\R2\FUNAN-PMP-GH-2 2020-09-24 09-19-16\002-P2-D4-FUNAN-PMP-RAC(Na).D  
 Sample Name: FUNAN-PMP-RAC(Na)

```

=====
Acq. Operator   : SYSTEM                      Seq. Line :    2
Acq. Instrument : 1260-DAD                    Location  : P2-D-04
Injection Date  : 9/24/2020 09:35:29         Inj       :    1
                                           Inj Volume: 3.000 µl
Different Inj Volume from Sample Entry! Actual Inj Volume : 5.000 µl
Acq. Method     : D:\Chem32\1\Data\WFY\wfy-4-paper2\FUNAN-PMP-GH-2 2020-09-24 09-19-16\IA-85-15-1ml-30min.M
Last changed    : 1/7/2019 21:25:37 by SYSTEM
Analysis Method : D:\Chem32\1\Data\WFY\wfy-4-paper2\FUNAN-PMP-GH-2 2020-09-24 09-19-16\IA-85-15-1ml-30min.M (Sequence Method)
Last changed    : 10/8/2020 16:15:27 by SYSTEM
                 (modified after loading)
Additional Info : Peak(s) manually integrated
  
```

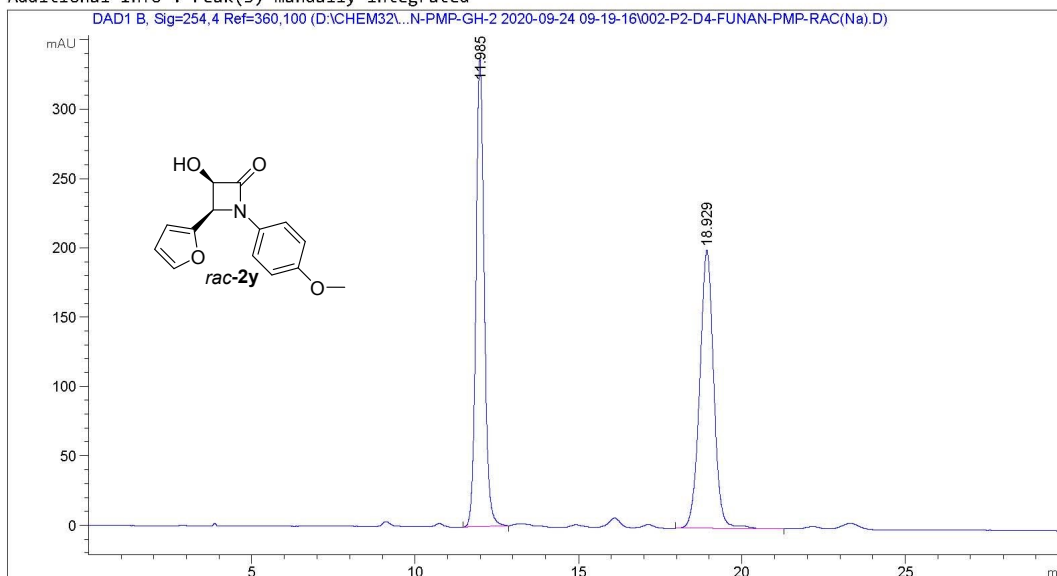

Area Percent Report

```

Sorted By      : Signal
Multiplier     : 1.0000
Dilution      : 1.0000
Use Multiplier & Dilution Factor with ISTDs
  
```

Signal 1: DAD1 B, Sig=254,4 Ref=360,100

| Peak # | RetTime [min] | Type | Width [min] | Area [mAU*s] | Height [mAU] | Area %  |
|--------|---------------|------|-------------|--------------|--------------|---------|
| 1      | 11.985        | BB   | 0.2652      | 5874.34375   | 337.19861    | 49.5997 |
| 2      | 18.929        | BB   | 0.4510      | 5969.17188   | 200.68852    | 50.4003 |

Totals : 1.18435e4 537.88713

=====

|                 |                      |            |            |
|-----------------|----------------------|------------|------------|
| Acq. Operator   | : SYSTEM             | Seq. Line  | : 3        |
| Acq. Instrument | : 1260-DAD           | Location   | : P2-D-03  |
| Injection Date  | : 9/24/2020 10:06:22 | Inj        | : 1        |
|                 |                      | Inj Volume | : 3.000 µl |

Different Inj Volume from Sample Entry! Actual Inj Volume : 5.000 µl

|                 |                                                                                                               |
|-----------------|---------------------------------------------------------------------------------------------------------------|
| Acq. Method     | : D:\Chem32\1\Data\WFY\wfy-4-paper2\FUNAN-PMP-GH-2 2020-09-24 09-19-16\IA-85-15-1ml-30min.M                   |
| Last changed    | : 1/7/2019 21:25:37 by SYSTEM                                                                                 |
| Analysis Method | : D:\Chem32\1\Data\WFY\wfy-4-paper2\FUNAN-PMP-GH-2 2020-09-24 09-19-16\IA-85-15-1ml-30min.M (Sequence Method) |
| Last changed    | : 10/8/2020 16:15:27 by SYSTEM (modified after loading)                                                       |

Additional Info : Peak(s) manually integrated

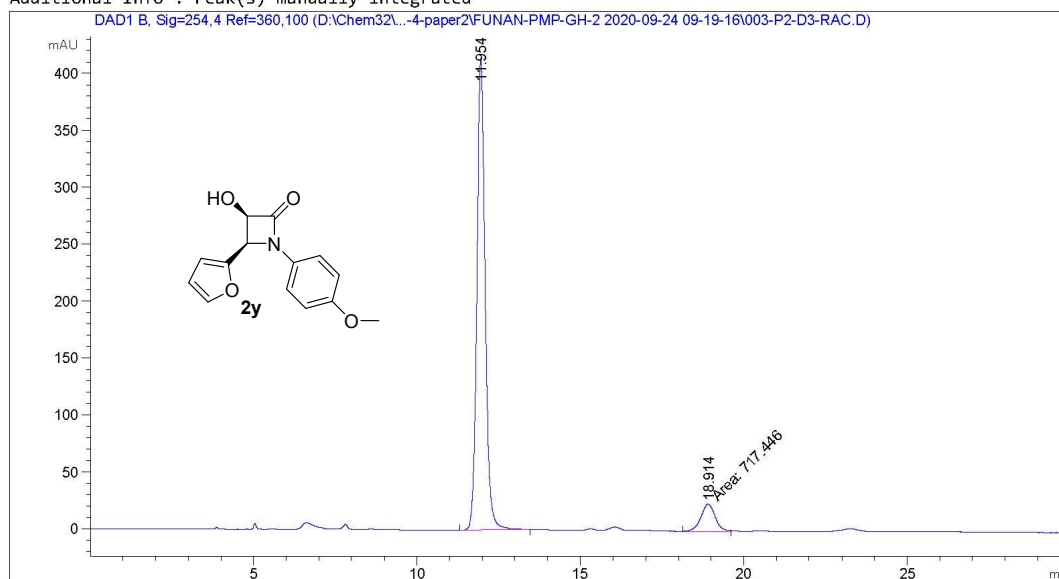

=====  
Area Percent Report  
=====

Sorted By : Signal  
Multiplier : 1.0000  
Dilution : 1.0000  
Use Multiplier & Dilution Factor with ISTDs

Signal 1: DAD1 B, Sig=254,4 Ref=360,100

| Peak # | RetTime [min] | Type | Width [min] | Area [mAU*s] | Height [mAU] | Area %  |
|--------|---------------|------|-------------|--------------|--------------|---------|
| 1      | 11.954        | BB   | 0.2665      | 7231.65381   | 412.65378    | 90.9745 |
| 2      | 18.914        | MM   | 0.4986      | 717.44562    | 23.98012     | 9.0255  |

Totals : 7949.09943 436.63390

```

=====
Acq. Operator   : SYSTEM                      Seq. Line :    3
Sample Operator : SYSTEM
Acq. Instrument : LC                        Location  : P2-C-02
Injection Date  : 10/16/2019 1:22:35 PM      Inj       :    1
                                           Inj Volume: 1.000 µl
Different Inj Volume from Sample Entry! Actual Inj Volume : 5.000 µl
Acq. Method     : D:\ChemStation\1\Data\Wfy\wfy-3-54\wfy-3-54-saifen~cyclehexane 2019-10-16
                                           12-40-28\OD-3-90-10-1ML-30min.M
Last changed    : 6/28/2019 8:29:21 AM by SYSTEM
Analysis Method : D:\ChemStation\1\Data\Wfy\wfy-3-54\wfy-3-54-saifen~cyclehexane 2019-10-16
                                           12-40-28\OD-3-90-10-1ML-30min.M (Sequence Method)
Last changed    : 11/14/2019 2:42:46 PM by SYSTEM
                                           (modified after loading)
Additional Info : Peak(s) manually integrated
  
```

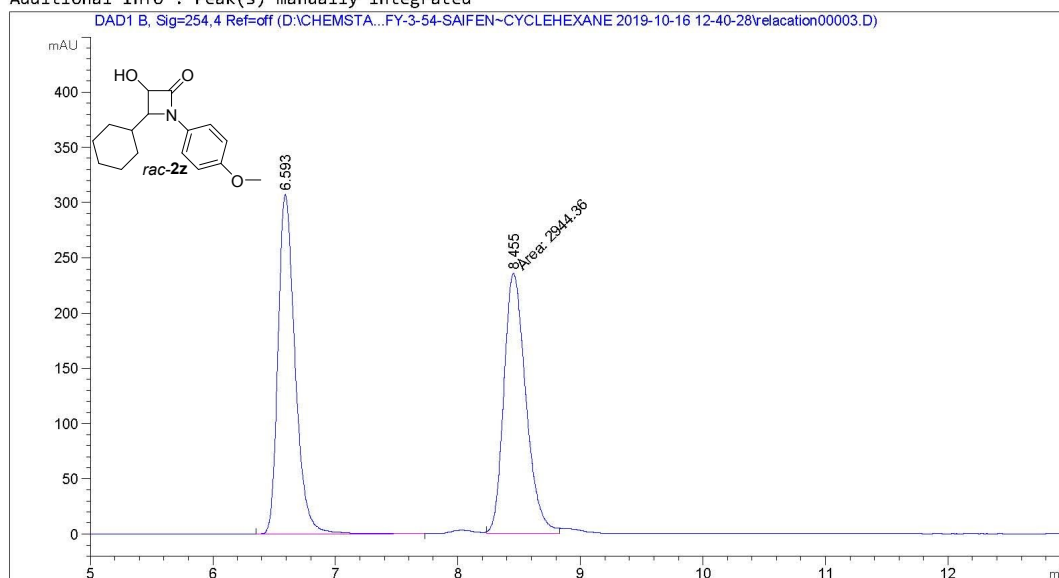

Area Percent Report

```

Sorted By      : Signal
Multiplier     : 1.0000
Dilution       : 1.0000
Use Multiplier & Dilution Factor with ISTDs
  
```

Signal 1: DAD1 B, Sig=254,4 Ref=off

| Peak # | RetTime [min] | Type | Width [min] | Area [mAU*s] | Height [mAU] | Area %  |
|--------|---------------|------|-------------|--------------|--------------|---------|
| 1      | 6.593         | BB   | 0.1465      | 2964.00635   | 307.38565    | 50.1662 |
| 2      | 8.455         | FM   | 0.2082      | 2944.36230   | 235.64851    | 49.8338 |

```

=====
Acq. Operator   : SYSTEM                      Seq. Line :    5
Sample Operator : SYSTEM
Acq. Instrument : LC                        Location  : P2-C-04
Injection Date  : 10/16/2019 2:24:17 PM      Inj       :    1
                                           Inj Volume: 1.000 µl
Different Inj Volume from Sample Entry! Actual Inj Volume : 5.000 µl
Acq. Method     : D:\ChemStation\1\Data\Wfy\wfy-3-54\wfy-3-54-saifen~cyclohexane 2019-10-16
                  12-40-28\OD-3-90-10-1ML-30min.M
Last changed    : 6/28/2019 8:29:21 AM by SYSTEM
Analysis Method : D:\ChemStation\1\Data\Wfy\wfy-3-54\wfy-3-54-saifen~cyclohexane 2019-10-16
                  12-40-28\OD-3-90-10-1ML-30min.M (Sequence Method)
Last changed    : 11/14/2019 2:44:23 PM by SYSTEM
                  (modified after loading)
  
```

Additional Info : Peak(s) manually integrated

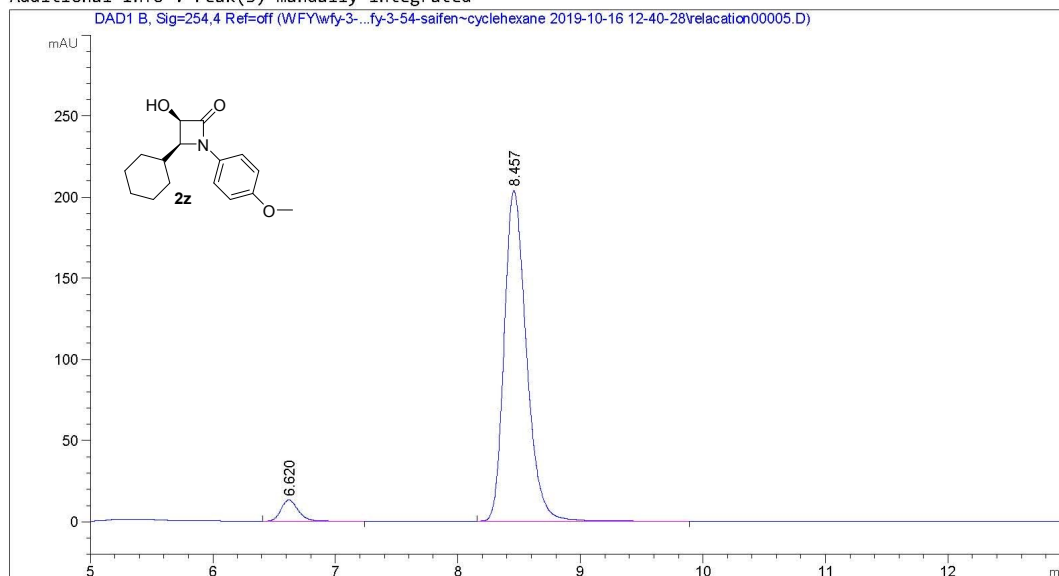

Area Percent Report

```

Sorted By      : Signal
Multiplier     : 1.0000
Dilution       : 1.0000
Use Multiplier & Dilution Factor with ISTDs
  
```

Signal 1: DAD1 B, Sig=254,4 Ref=off

| Peak # | RetTime [min] | Type | Width [min] | Area [mAU*s] | Height [mAU] | Area %  |
|--------|---------------|------|-------------|--------------|--------------|---------|
| 1      | 6.620         | BB   | 0.1489      | 129.83894    | 13.18489     | 4.8267  |
| 2      | 8.457         | BB   | 0.1926      | 2560.18066   | 203.73653    | 95.1733 |







```

=====
Acq. Operator   : SYSTEM                      Seq. Line :    2
Sample Operator : SYSTEM
Acq. Instrument : LC                        Location  : P1-C-08
Injection Date  : 11/24/2019 5:02:28 PM      Inj       :    1
                                           Inj Volume: 1.000 µl
Different Inj Volume from Sample Entry! Actual Inj Volume : 5.000 µl
Acq. Method     : D:\ChemStation\1\Data\WFY\WFY-3-PMPPMP-KAIHUAN\WFY-3-PMP-PMP-KAIHUAN-90-10
                 2019-11-24 16-51-12\OD-3-90-10-1ML-45min.M
Last changed    : 6/27/2019 12:37:27 PM by SYSTEM
Analysis Method : D:\ChemStation\1\Data\WFY\WFY-3-PMPPMP-KAIHUAN\WFY-3-PMP-PMP-KAIHUAN-90-10
                 2019-11-24 16-51-12\OD-3-90-10-1ML-45min.M (Sequence Method)
Last changed    : 12/18/2019 9:04:07 PM by SYSTEM
                 (modified after loading)
Additional Info : Peak(s) manually integrated
  
```

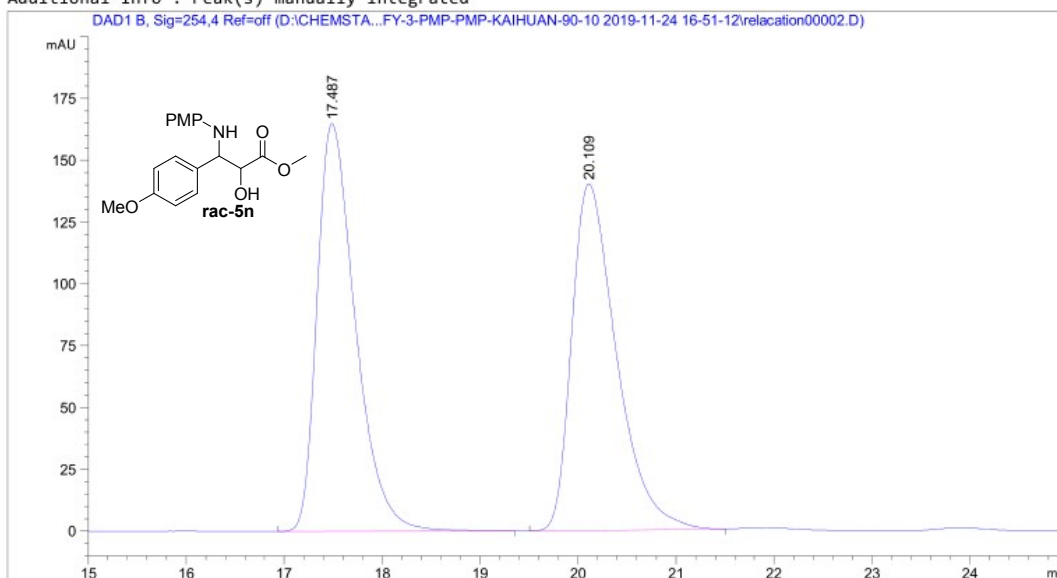

Area Percent Report

```

Sorted By      : Signal
Multiplier     : 1.0000
Dilution       : 1.0000
Use Multiplier & Dilution Factor with ISTDs
  
```

Signal 1: DAD1 B, Sig=254,4 Ref=off

| Peak # | RetTime [min] | Type | Width [min] | Area [mAU*s] | Height [mAU] | Area %  |
|--------|---------------|------|-------------|--------------|--------------|---------|
| 1      | 17.487        | BB   | 0.4133      | 4488.58545   | 165.02647    | 50.2252 |
| 2      | 20.109        | BB   | 0.4842      | 4448.33887   | 140.20222    | 49.7748 |

```

=====
Acq. Operator   : SYSTEM                      Seq. Line :    2
Sample Operator : SYSTEM
Acq. Instrument : LC                        Location  : P1-C-09
Injection Date  : 11/24/2019 8:27:15 PM      Inj       :    1
                                           Inj Volume: 1.000 µl
Different Inj Volume from Sample Entry! Actual Inj Volume : 5.000 µl
Acq. Method    : D:\ChemStation\1\Data\WFY\WFY-3-PMPPMP-KAIHUAN\WFY-PMP-PMP-KAIHUAN-GH 2019-
11-24 20-16-01\OD-3-90-10-1ML-30min.M
Last changed   : 6/28/2019 8:29:21 AM by SYSTEM
Analysis Method : D:\ChemStation\1\Data\WFY\WFY-3-PMPPMP-KAIHUAN\WFY-PMP-PMP-KAIHUAN-GH 2019-
11-24 20-16-01\OD-3-90-10-1ML-30min.M (Sequence Method)
Last changed   : 12/18/2019 9:06:26 PM by SYSTEM
                (modified after loading)
Additional Info : Peak(s) manually integrated
  
```

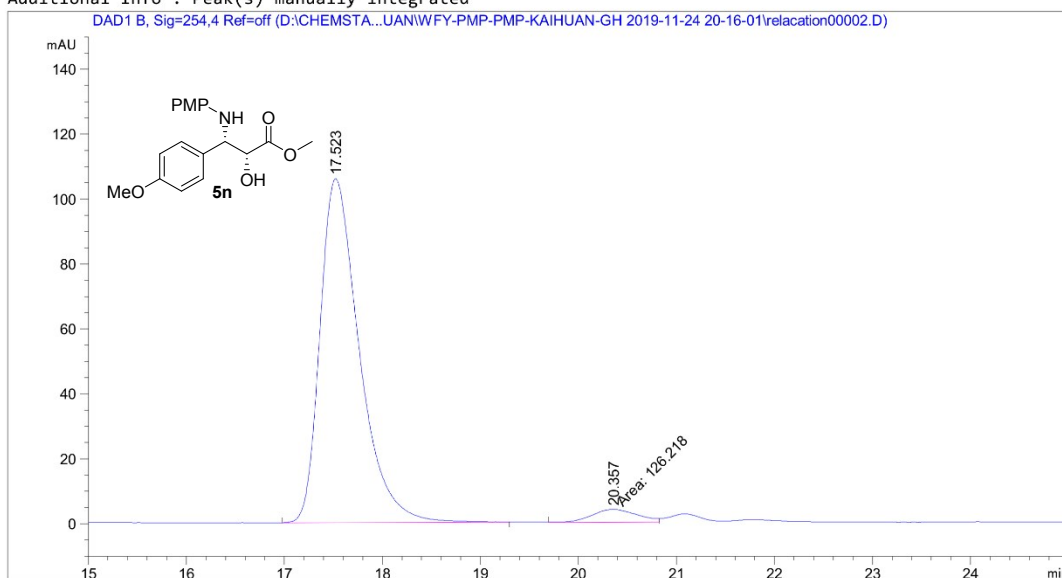

=====  
 Area Percent Report  
 =====

```

Sorted By      : Signal
Multiplier     : 1.0000
Dilution      : 1.0000
Use Multiplier & Dilution Factor with ISTDs
  
```

Signal 1: DAD1 B, Sig=254,4 Ref=off

| Peak # | RetTime [min] | Type | Width [min] | Area [mAU*s] | Height [mAU] | Area %  |
|--------|---------------|------|-------------|--------------|--------------|---------|
| 1      | 17.523        | BB   | 0.4197      | 2937.01978   | 105.86768    | 95.8796 |
| 2      | 20.357        | MF   | 0.5393      | 126.21805    | 3.90050      | 4.1204  |

```

=====
Acq. Operator   : SYSTEM                      Seq. Line : 16
Sample Operator : SYSTEM
Acq. Instrument : LC                        Location  : P1-A-06
Injection Date  : 12/16/2019 12:54:42 AM    Inj       : 1
                                           Inj Volume: 2.000 µl
Different Inj Volume from Sample Entry! Actual Inj Volume : 3.000 µl
Acq. Method     : D:\ChemStation\1\Data\WfY\wfy-3-101\wfy-3-101 2019-12-15 18-14-09\OD-3-90-10-1ML-10min.M
Last changed    : 6/27/2019 12:37:27 PM by SYSTEM
Analysis Method : D:\ChemStation\1\Data\WfY\wfy-3-101\wfy-3-101 2019-12-15 18-14-09\OD-3-90-10-1ML-10min.M (Sequence Method)
Last changed    : 12/18/2019 9:14:31 PM by SYSTEM
                (modified after loading)
  
```

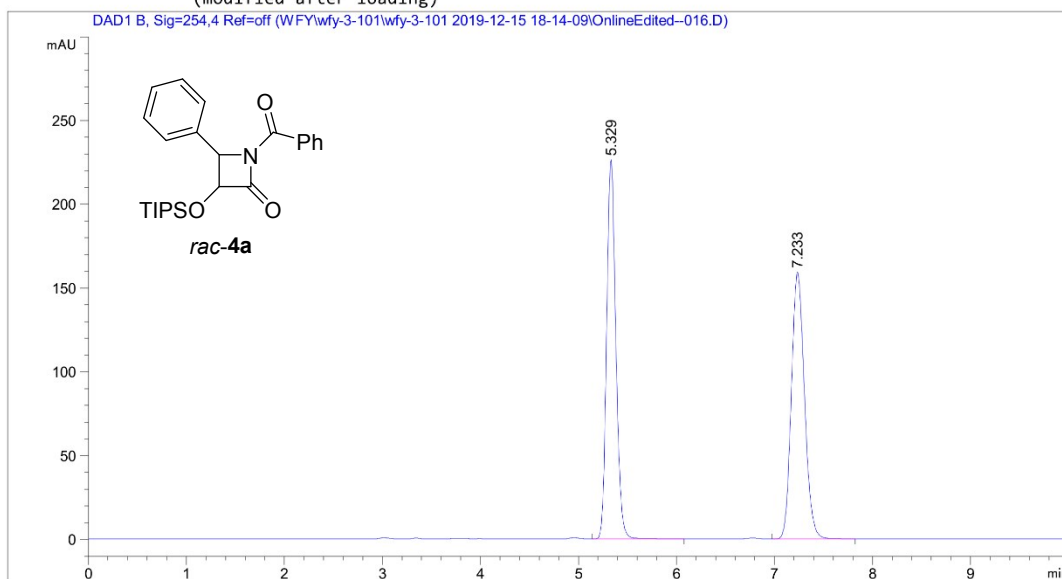

=====  
 Area Percent Report  
 =====

```

Sorted By       : Signal
Multiplier      : 1.0000
Dilution       : 1.0000
Use Multiplier & Dilution Factor with ISTDs
  
```

Signal 1: DAD1 B, Sig=254,4 Ref=off

| Peak # | RetTime [min] | Type | Width [min] | Area [mAU*s] | Height [mAU] | Area %  |
|--------|---------------|------|-------------|--------------|--------------|---------|
| 1      | 5.329         | BB   | 0.1002      | 1477.27869   | 226.32774    | 50.0182 |
| 2      | 7.233         | BB   | 0.1442      | 1476.20435   | 159.22878    | 49.9818 |

Totals :                            2953.48303    385.55652

```

=====
Acq. Operator   : SYSTEM                      Seq. Line : 17
Sample Operator : SYSTEM
Acq. Instrument : LC                        Location  : P1-A-07
Injection Date  : 12/16/2019 1:05:36 AM      Inj       : 1
                                           Inj Volume: 2.000 µl
Different Inj Volume from Sample Entry! Actual Inj Volume : 8.000 µl
Acq. Method     : D:\ChemStation\1\Data\WfY\wfy-3-101\wfy-3-101 2019-12-15 18-14-09\OD-3-90-10-1ML-10min.M
Last changed    : 6/27/2019 12:37:27 PM by SYSTEM
Analysis Method : D:\ChemStation\1\Data\WfY\wfy-3-101\wfy-3-101 2019-12-15 18-14-09\OD-3-90-10-1ML-10min.M (Sequence Method)
Last changed    : 12/18/2019 9:13:44 PM by SYSTEM
                 (modified after loading)
Additional Info  : Peak(s) manually integrated
  
```

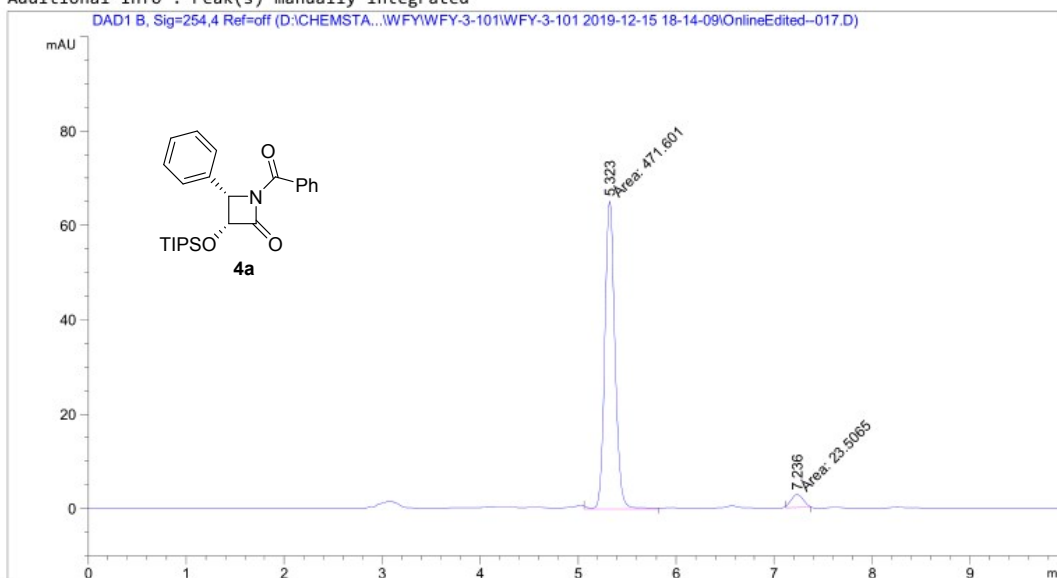

Area Percent Report

```

Sorted By      : Signal
Multiplier     : 1.0000
Dilution      : 1.0000
Use Multiplier & Dilution Factor with ISTDs
  
```

Signal 1: DAD1 B, Sig=254,4 Ref=off

| Peak # | RetTime [min] | Type | Width [min] | Area [mAU*s] | Height [mAU] | Area %  |
|--------|---------------|------|-------------|--------------|--------------|---------|
| 1      | 5.323         | MM   | 0.1203      | 471.60080    | 65.35562     | 95.2522 |
| 2      | 7.236         | MM   | 0.1420      | 23.50647     | 2.75968      | 4.7478  |

## 10. References.

- [1] a) N. Piens, H. Goossens, D. Hertsen, S. Deketelaere, L. Crul, L. Demeurisse, J. De Moor, E. Van den Broeck, K. Mollet, K. Van Hecke, V. Van Speybroeck, M. D'Hooghe, *Chemistry* **2017**, *23*, 18002-18009; b) A. L. Shaikh, B. K. Banik, *Helv. Chim. Acta* **2012**, *95*, 839-844.
- [2] S. S. Bari, M. S. Magtoof, A. Bhalla, *Monatshefte für Chemie - Chemical Monthly* **2010**, *141*, 987-991.
- [3] Y. Yang, M. Drolet, M. M. Kayser, *Tetrahedron: Asymmetry* **2005**, *16*, 2748-2753.
- [4] Y. Kawashima, M. Satoh, Y. Hatada, F. Hazato, Y. Nakashima, K. Sota, Taisho Pharmaceutical Co., Ltd., Japan . **1988**, p. 20 pp.
- [5] G. Cremonesi, P. Dalla Croce, C. La Rosa, *Helv. Chim. Acta* **2005**, *88*, 1580-1588.
- [6] J. A. Carr, T. F. Al-Azemi, T. E. Long, J.-Y. Shim, C. M. Coates, E. Turos, K. S. Bisht, *Tetrahedron* **2003**, *59*, 9147-9160.
- [7] Y. Paik, C. Yang, B. Metaferia, S. Tang, S. Bane, R. Ravindra, N. Shanker, A. A. Alcaraz, S. A. Johnson, J. Schaefer, R. D. O'Connor, L. Cegelski, J. P. Snyder, D. G. I. Kingston, *J. Am. Chem. Soc.* **2007**, *129*, 361-370.
- [8] L. Decuyper, J. Franceus, S. Dhaene, M. Debruyne, K. Vandoorne, N. Piens, G. Dewitte, T. Desmet, M. D'Hooghe, *ACS Omega* **2018**, *3*, 15235-15245.
- [9] R. K. Mishra, C. M. Coates, K. D. Revell, E. Turos, *Org. Lett.* **2007**, *9*, 575-578.
- [10] Y. Paik, C. Yang, B. Metaferia, S. Tang, S. Bane, R. Ravindra, N. Shanker, A. A. Alcaraz, S. A. Johnson, J. Schaefer, R. D. O'Connor, L. Cegelski, J. P. Snyder, D. G. Kingston, *J. Am. Chem. Soc.* **2007**, *129*, 361-370.
- [11] Yadav, Ram Naresh et al, *J. Indian Chem. Soc.*, **2018**, *95*, 1381-1384.
- [12] Anand, Naveen et al, *Tetrahedron: Asymmetry*, **2007**, *18*, 1059-1069.
- [13] Kayser, Margaret M. et al, *Can. J. Chem.*, **2002**, *80*, 796-800.
